# Supplementary material for: A Minimal Set of Tissue-Specific Hypomethylated CpGs Constitute Epigenetic Signatures of Developmental Programming
Source: PLoS One. 2013 Sep 12;8(9):e72670. doi: 10.1371/journal.pone.0072670 (PMC3771925; doi:10.1371/journal.pone.0072670)
Supplement: Data Set S2 — Methyl Sensitive Cut Counting Results for CpG sites surveyed in the lambda phage genome (XLSX) [file pone.0072670.s003.xlsx]

## Sheet: Sheet1
chrm	pos	BN	BR	BV	KN	KR	KV	LN	LR	LV	TN	TR	TV
Lambda	4	0	0	0	0	0	0	0	0	0	0	0	0
Lambda	15	0	0	0	0	0	0	0	0	0	0	0	0
Lambda	43	29	7	12	22	13	4	22	7	7	28	11	9
Lambda	286	8	2	2	4	7	13	3	5	4	10	8	8
Lambda	322	0	0	1	2	0	1	0	0	0	0	0	1
Lambda	377	35	18	15	29	41	58	34	34	25	42	24	40
Lambda	380	69	41	79	57	34	65	66	27	67	53	65	66
Lambda	398	33	33	25	31	46	50	50	48	28	40	45	29
Lambda	465	162	157	141	146	134	177	148	165	150	168	127	144
Lambda	505	2	1	2	4	1	1	0	2	1	1	3	1
Lambda	523	0	0	0	0	0	0	0	0	0	0	0	0
Lambda	548	46	57	52	61	62	60	78	81	51	134	44	37
Lambda	602	14	20	15	25	30	31	22	18	19	25	17	18
Lambda	612	81	113	97	70	93	88	140	107	137	89	96	89
Lambda	679	6	7	10	23	10	19	7	21	17	14	18	18
Lambda	681	20	24	22	39	45	33	19	47	21	29	28	28
Lambda	699	6	7	14	6	2	5	3	1	5	5	11	7
Lambda	744	1	0	3	7	1	4	1	2	0	6	2	1
Lambda	756	11	45	30	18	17	34	66	33	32	56	26	30
Lambda	758	36	56	31	71	43	70	24	53	62	44	48	45
Lambda	761	25	31	26	13	26	18	20	8	29	11	15	20
Lambda	784	84	70	78	45	36	44	58	22	97	22	44	70
Lambda	797	1	0	1	6	1	2	0	1	0	2	0	1
Lambda	811	0	0	0	1	0	0	0	0	0	0	0	0
Lambda	842	1	0	1	1	1	0	0	0	1	3	3	2
Lambda	858	125	68	93	103	64	72	66	75	60	67	76	69
Lambda	882	38	25	34	47	22	19	29	25	25	15	20	26
Lambda	1005	79	61	78	141	51	61	65	65	67	87	52	88
Lambda	1064	2	3	5	13	8	8	3	6	4	4	9	9
Lambda	1102	62	56	53	66	57	66	43	89	30	69	53	64
Lambda	1131	40	14	30	32	22	11	25	22	12	29	16	24
Lambda	1190	17	13	12	10	21	13	15	20	14	7	19	11
Lambda	1198	0	0	0	0	0	0	0	0	0	1	0	0
Lambda	1234	10	2	2	6	4	4	7	2	3	19	6	3
Lambda	1291	7	7	9	7	10	12	3	5	6	6	7	7
Lambda	1402	33	9	14	26	36	33	29	27	29	34	21	21
Lambda	1432	0	0	0	0	0	0	0	1	0	0	0	0
Lambda	1439	0	0	0	0	0	0	0	1	1	0	0	0
Lambda	1501	79	42	87	54	75	67	60	68	73	47	47	74
Lambda	1554	25	31	38	50	35	33	31	67	24	46	26	36
Lambda	1604	8	4	7	6	5	5	2	3	2	5	7	9
Lambda	1646	83	56	83	138	97	87	82	84	69	130	92	82
Lambda	1767	0	1	2	3	2	1	2	1	1	4	2	4
Lambda	1801	0	1	0	0	1	1	0	2	0	1	1	1
Lambda	1824	3	0	1	7	2	4	2	1	2	3	1	2
Lambda	1828	113	78	87	103	123	131	122	51	140	179	88	89
Lambda	1851	0	0	1	2	0	1	1	0	0	1	1	1
Lambda	1870	8	16	11	16	20	23	7	11	8	9	19	12
Lambda	1901	0	1	2	0	0	4	0	0	1	1	1	2
Lambda	1904	9	19	19	12	13	9	14	32	12	7	15	12
Lambda	1926	0	0	1	0	1	1	0	0	0	0	0	0
Lambda	1938	23	54	30	44	42	56	36	73	35	52	30	40
Lambda	1957	3	4	3	14	3	12	3	2	16	7	5	10
Lambda	1983	55	33	45	47	36	33	34	29	42	36	35	42
Lambda	2001	1	1	5	3	6	4	1	2	1	7	3	5
Lambda	2061	1	2	3	3	7	4	2	1	0	2	2	3
Lambda	2064	1	2	1	1	4	6	0	1	2	3	8	1
Lambda	2111	1	1	0	3	0	1	0	3	1	0	1	1
Lambda	2163	20	20	16	14	9	27	22	10	23	25	15	31
Lambda	2203	39	33	34	28	45	33	65	37	27	42	42	48
Lambda	2220	1	7	1	8	6	7	2	1	7	5	6	3
Lambda	2270	11	23	22	14	16	15	22	39	19	28	17	18
Lambda	2292	0	0	0	0	0	0	0	0	0	0	0	1
Lambda	2308	32	28	29	21	14	19	21	7	19	15	21	27
Lambda	2323	0	0	0	0	0	1	0	0	0	0	0	0
Lambda	2330	0	2	3	6	2	4	2	1	6	2	5	1
Lambda	2356	1	2	1	7	9	9	0	0	1	5	1	3
Lambda	2380	0	0	1	0	0	1	0	2	0	0	1	3
Lambda	2491	48	50	60	63	63	77	45	64	43	79	72	60
Lambda	2497	0	0	1	2	0	1	1	0	0	0	0	1
Lambda	2500	1	1	2	3	0	3	0	0	4	1	1	3
Lambda	2505	7	10	5	7	7	6	3	4	14	2	12	7
Lambda	2520	0	0	0	0	0	0	0	0	0	0	0	0
Lambda	2542	106	69	112	93	131	121	93	100	124	69	98	123
Lambda	2621	82	95	111	89	76	93	140	77	69	116	86	110
Lambda	2656	0	0	1	0	0	1	1	0	2	0	0	0
Lambda	2667	25	10	18	17	18	19	19	20	21	19	13	17
Lambda	2794	124	101	101	78	80	61	117	117	90	94	111	91
Lambda	2870	55	17	27	18	31	30	25	17	47	9	27	31
Lambda	2890	5	3	1	20	8	39	6	5	10	30	9	12
Lambda	2901	8	8	4	1	5	11	14	4	13	3	8	4
Lambda	2913	0	0	0	0	0	1	0	1	0	0	0	0
Lambda	2922	0	0	0	0	0	0	0	0	0	0	0	0
Lambda	2941	15	8	10	4	16	14	18	16	14	11	12	16
Lambda	3010	20	23	29	23	35	33	38	22	29	35	32	21
Lambda	3012	96	117	113	104	95	78	137	116	151	99	115	119
Lambda	3045	11	17	12	17	19	26	17	45	18	25	20	20
Lambda	3094	14	16	22	30	4	13	16	12	16	15	14	25
Lambda	3118	62	47	56	85	49	92	43	53	64	73	61	76
Lambda	3160	33	62	55	43	48	39	42	59	50	62	41	39
Lambda	3173	8	4	2	5	11	4	7	3	4	11	6	2
Lambda	3216	10	7	10	16	9	13	7	18	13	10	5	18
Lambda	3233	0	2	1	3	0	2	1	5	2	1	0	1
Lambda	3322	22	16	31	23	23	19	22	21	33	24	16	23
Lambda	3331	13	27	15	14	11	13	25	9	19	10	19	16
Lambda	3343	1	1	4	2	2	3	0	0	4	3	2	4
Lambda	3361	1	1	0	1	1	6	1	0	0	5	1	0
Lambda	3384	0	1	1	7	1	5	0	0	3	5	1	1
Lambda	3394	0	5	3	2	5	4	5	8	6	4	6	4
Lambda	3408	5	2	1	2	4	1	2	0	1	1	2	1
Lambda	3429	0	0	0	0	0	1	1	0	0	1	1	0
Lambda	3434	4	0	1	5	4	1	2	0	2	1	2	4
Lambda	3437	23	26	26	31	29	28	28	23	11	28	40	24
Lambda	3450	23	16	38	39	23	44	21	47	20	26	26	34
Lambda	3482	19	24	16	22	19	11	33	24	14	21	17	10
Lambda	3516	21	7	12	14	5	9	31	20	5	11	15	16
Lambda	3519	3	1	7	4	4	6	1	4	6	1	0	4
Lambda	3523	10	2	5	8	9	8	10	9	6	5	3	8
Lambda	3525	21	17	29	9	18	21	26	21	17	12	12	18
Lambda	3540	10	6	5	7	2	20	14	4	8	11	5	8
Lambda	3573	29	54	53	38	42	33	64	99	51	70	34	34
Lambda	3648	110	72	93	80	89	104	86	68	74	85	98	122
Lambda	3672	16	7	10	19	7	9	11	14	10	14	11	11
Lambda	3726	31	70	55	66	48	50	51	62	41	67	64	32
Lambda	3745	0	0	0	0	0	0	0	0	0	0	0	0
Lambda	3759	11	11	13	12	6	8	13	7	12	10	16	11
Lambda	3780	0	2	1	4	7	3	6	2	4	14	4	4
Lambda	3792	0	0	0	0	0	1	0	0	0	0	0	1
Lambda	3797	1	0	0	5	4	5	1	3	3	2	1	1
Lambda	3800	2	2	1	2	1	2	1	0	1	0	1	1
Lambda	3805	0	0	0	0	0	0	0	0	0	0	0	1
Lambda	3816	2	1	1	11	2	16	2	3	4	9	2	4
Lambda	3827	1	0	1	6	4	8	2	2	5	2	1	1
Lambda	3839	89	99	118	80	58	41	56	106	56	46	71	90
Lambda	3913	25	21	17	36	27	41	29	39	17	33	31	31
Lambda	3927	70	68	61	38	37	21	40	33	38	21	49	53
Lambda	3958	34	27	40	41	28	24	48	30	24	54	41	46
Lambda	4030	47	69	51	87	60	66	51	111	67	92	56	59
Lambda	4102	41	48	52	48	29	28	52	71	56	33	39	32
Lambda	4112	15	4	1	7	7	13	9	2	10	8	12	3
Lambda	4127	26	24	31	24	29	25	34	17	30	21	26	23
Lambda	4129	23	74	67	34	88	57	78	62	64	64	68	41
Lambda	4150	7	9	7	23	18	17	11	13	11	16	16	13
Lambda	4185	114	88	115	78	63	63	93	87	82	56	92	111
Lambda	4226	0	0	1	3	1	1	0	1	1	2	2	1
Lambda	4245	24	15	12	12	15	9	26	8	16	9	34	26
Lambda	4272	3	7	7	6	3	6	9	3	8	3	5	5
Lambda	4281	0	4	4	3	2	2	2	3	2	3	3	2
Lambda	4333	1	2	4	4	6	9	6	1	5	5	3	2
Lambda	4344	13	12	12	9	12	11	16	10	21	12	10	7
Lambda	4355	0	0	0	1	0	3	0	0	0	0	0	0
Lambda	4359	0	0	0	0	0	0	0	0	0	0	0	0
Lambda	4367	0	0	0	1	2	2	0	2	2	0	0	1
Lambda	4386	106	106	107	102	79	62	100	72	96	62	95	102
Lambda	4443	0	0	1	0	1	0	0	0	1	0	1	0
Lambda	4473	0	0	0	0	0	0	0	0	0	0	0	0
Lambda	4489	0	0	0	0	0	0	0	0	0	0	0	0
Lambda	4497	54	7	58	54	5	31	47	19	79	21	12	59
Lambda	4499	0	0	0	0	0	0	0	0	0	0	0	0
Lambda	4515	85	96	81	95	73	94	47	82	83	46	74	94
Lambda	4554	0	0	1	3	2	4	0	0	2	3	2	1
Lambda	4561	75	141	132	99	85	105	114	94	127	99	119	111
Lambda	4609	109	153	156	167	112	89	135	124	110	84	131	153
Lambda	4637	2	1	1	3	4	4	2	3	2	4	2	4
Lambda	4674	26	29	25	26	32	27	22	36	29	31	26	30
Lambda	4681	0	3	7	4	7	14	4	2	14	7	9	7
Lambda	4697	2	4	7	5	4	7	1	0	10	4	3	7
Lambda	4703	2	5	4	7	7	17	4	5	4	7	7	10
Lambda	4707	0	1	1	0	2	4	1	0	0	1	1	0
Lambda	4732	42	58	88	49	69	69	121	52	54	95	86	67
Lambda	4816	38	28	47	26	39	43	34	23	42	30	40	47
Lambda	4819	10	12	6	11	11	13	11	12	5	11	9	7
Lambda	4830	0	0	1	1	0	3	0	0	0	0	0	2
Lambda	4846	5	4	2	6	8	21	2	4	3	10	2	7
Lambda	4881	3	6	14	4	4	13	3	5	14	3	3	20
Lambda	4890	48	41	39	46	60	59	50	80	43	62	41	45
Lambda	4939	27	15	22	18	24	19	29	26	9	28	18	24
Lambda	4946	53	62	55	34	53	36	52	53	71	45	51	45
Lambda	4966	8	3	4	8	8	9	2	3	5	7	6	5
Lambda	4970	85	70	93	74	65	63	76	109	61	64	67	62
Lambda	5019	107	85	93	135	75	61	89	95	61	94	91	99
Lambda	5059	8	3	2	8	5	6	1	4	3	6	5	5
Lambda	5100	33	28	23	18	24	16	30	36	11	34	35	19
Lambda	5107	0	0	0	1	0	1	0	0	0	1	0	0
Lambda	5111	0	0	0	0	0	1	0	0	0	0	0	1
Lambda	5129	0	1	0	0	0	0	0	0	0	0	0	0
Lambda	5144	0	0	0	2	0	2	0	0	0	0	0	1
Lambda	5157	2	7	11	17	17	26	4	5	11	13	10	11
Lambda	5179	86	46	61	44	42	30	49	41	63	18	35	53
Lambda	5227	19	14	10	38	19	23	21	27	14	24	19	14
Lambda	5248	83	82	86	64	49	50	73	55	60	36	84	65
Lambda	5315	13	14	16	15	12	16	13	28	10	15	15	20
Lambda	5395	3	8	5	7	15	23	3	8	12	9	7	8
Lambda	5404	10	9	14	18	26	8	8	23	14	13	8	15
Lambda	5437	55	56	73	47	83	65	56	48	99	71	60	49
Lambda	5439	37	23	28	27	36	29	27	16	37	26	26	23
Lambda	5442	2	2	3	3	2	4	3	0	6	1	2	1
Lambda	5448	0	1	4	4	1	1	1	0	6	1	0	2
Lambda	5452	0	4	3	1	0	8	0	0	3	1	2	4
Lambda	5460	59	75	44	35	62	71	90	79	54	67	68	47
Lambda	5470	0	0	0	0	0	0	0	0	0	0	0	0
Lambda	5475	0	0	0	0	0	0	0	0	0	0	0	0
Lambda	5481	0	0	0	0	0	0	0	0	0	0	0	0
Lambda	5495	3	5	1	1	0	3	6	4	4	3	8	2
Lambda	5569	67	65	79	37	68	61	131	49	86	57	79	49
Lambda	5591	2	1	1	1	2	11	1	0	1	5	0	1
Lambda	5594	0	0	0	0	0	0	0	0	0	0	0	0
Lambda	5605	0	0	0	0	0	0	0	0	0	0	0	0
Lambda	5628	39	30	54	32	35	50	50	41	52	31	43	58
Lambda	5630	10	6	16	6	14	13	5	0	18	2	11	10
Lambda	5643	0	3	3	8	15	19	4	2	4	12	6	8
Lambda	5670	1	1	1	5	5	9	2	2	4	4	6	7
Lambda	5676	3	0	1	11	4	19	1	4	6	9	5	5
Lambda	5694	38	20	42	20	33	37	36	18	22	40	34	35
Lambda	5781	4	1	3	10	5	3	3	2	0	5	1	4
Lambda	5799	37	40	50	40	48	58	55	45	67	60	62	57
Lambda	5809	0	0	0	0	0	0	0	0	0	0	0	0
Lambda	5815	0	0	0	0	0	2	0	0	0	1	0	0
Lambda	5817	1	0	0	1	0	3	0	1	2	2	1	1
Lambda	5821	0	0	1	0	0	2	0	0	1	0	0	1
Lambda	5824	0	0	0	0	0	0	0	0	0	0	0	0
Lambda	5841	131	85	108	104	104	115	67	62	154	50	93	119
Lambda	5856	15	16	10	19	26	20	16	29	14	36	21	14
Lambda	5934	37	25	29	35	26	37	19	41	28	33	38	30
Lambda	5967	28	20	22	26	22	24	16	32	19	16	16	25
Lambda	5980	42	18	26	20	20	13	25	16	20	7	12	24
Lambda	5985	0	0	1	3	1	1	0	2	0	0	2	1
Lambda	6012	41	67	51	46	49	39	56	61	69	37	40	42
Lambda	6046	3	12	12	11	15	17	6	14	5	11	7	7
Lambda	6055	97	108	111	141	72	45	110	78	111	71	83	93
Lambda	6103	0	0	0	0	0	0	0	0	0	0	0	0
Lambda	6111	0	0	0	0	0	0	0	0	0	0	0	0
Lambda	6152	0	0	0	0	0	0	0	0	0	0	0	0
Lambda	6166	0	0	0	0	0	0	0	0	0	0	0	0
Lambda	6196	8	8	10	9	9	13	13	9	9	18	10	15
Lambda	6268	0	0	1	0	0	0	1	0	0	1	0	0
Lambda	6286	2	0	2	2	4	6	1	2	4	7	1	4
Lambda	6293	0	0	0	0	0	3	0	0	0	0	1	2
Lambda	6311	61	64	84	51	32	39	61	39	39	35	48	46
Lambda	6335	0	0	1	5	9	5	1	1	4	8	5	1
Lambda	6358	74	78	84	84	53	40	79	47	58	51	67	69
Lambda	6391	2	2	1	6	4	6	2	2	1	6	4	4
Lambda	6415	68	73	77	53	71	70	89	68	81	65	72	78
Lambda	6427	0	0	0	1	0	0	0	0	0	1	0	1
Lambda	6439	0	0	0	0	0	0	0	6	0	0	0	0
Lambda	6445	36	38	31	22	53	68	47	19	41	46	63	36
Lambda	6453	0	0	0	0	0	0	0	0	0	0	0	0
Lambda	6456	3	4	4	5	5	2	6	2	5	5	5	7
Lambda	6563	6	10	10	13	11	6	19	14	6	22	18	12
Lambda	6580	56	52	52	53	41	47	50	66	40	42	30	44
Lambda	6600	0	0	0	0	0	1	0	0	0	0	0	0
Lambda	6629	61	113	97	54	80	68	62	64	81	46	103	89
Lambda	6632	18	32	27	21	21	23	29	22	21	24	24	29
Lambda	6664	5	8	7	8	7	9	2	7	3	5	9	13
Lambda	6697	92	124	128	125	107	120	136	117	108	105	113	120
Lambda	6710	2	0	2	1	0	7	1	0	1	1	0	5
Lambda	6751	91	70	76	84	111	168	82	51	75	114	96	86
Lambda	6826	11	5	10	10	12	8	10	5	6	8	8	9
Lambda	6847	0	0	0	0	0	1	0	0	0	0	0	0
Lambda	6896	22	22	16	21	18	15	24	12	17	30	21	20
Lambda	6905	0	0	0	1	1	4	0	0	0	2	1	1
Lambda	6937	11	15	11	11	2	5	11	10	8	9	9	4
Lambda	6974	1	1	0	2	4	6	1	0	2	5	1	3
Lambda	6981	46	58	54	46	28	55	38	28	56	40	49	36
Lambda	7006	0	0	0	0	0	0	0	0	0	0	0	0
Lambda	7017	105	136	129	180	98	109	91	159	119	118	82	111
Lambda	7067	18	13	15	19	12	10	22	44	21	15	21	13
Lambda	7075	20	11	10	13	15	18	12	9	9	13	6	16
Lambda	7078	14	9	9	8	21	29	9	6	7	30	16	20
Lambda	7108	1	1	1	2	0	1	1	3	1	1	1	1
Lambda	7232	24	12	11	19	22	14	23	13	12	20	19	20
Lambda	7293	118	82	112	129	103	105	102	106	88	112	118	117
Lambda	7345	37	44	43	47	27	21	44	55	31	32	26	29
Lambda	7367	1	2	2	1	6	2	2	2	4	5	2	1
Lambda	7384	0	4	4	7	4	15	7	6	6	11	4	7
Lambda	7410	3	1	2	4	1	13	4	3	2	7	1	5
Lambda	7416	13	3	5	8	11	8	8	9	9	8	11	6
Lambda	7437	7	4	6	6	11	18	7	16	11	8	13	5
Lambda	7499	21	38	41	42	29	47	44	51	35	57	32	44
Lambda	7527	21	29	14	23	18	20	29	16	35	21	32	18
Lambda	7552	2	11	13	15	11	11	13	13	15	17	7	11
Lambda	7577	3	8	16	14	24	26	10	6	18	20	13	12
Lambda	7579	4	3	4	5	7	13	1	4	9	7	4	11
Lambda	7608	6	8	7	17	11	6	4	10	4	2	14	8
Lambda	7651	0	6	6	4	7	10	7	8	8	11	5	9
Lambda	7653	27	64	39	33	57	22	15	42	23	11	47	44
Lambda	7671	0	0	0	1	0	1	0	1	0	1	0	0
Lambda	7685	1	0	0	0	0	0	0	0	0	0	0	0
Lambda	7704	52	51	49	43	25	36	33	23	51	35	44	42
Lambda	7721	0	0	0	0	0	0	0	0	0	1	0	0
Lambda	7729	0	0	0	1	0	0	0	0	0	0	0	0
Lambda	7767	4	1	12	5	2	5	2	1	10	1	1	11
Lambda	7780	1	2	2	11	19	24	1	5	6	20	3	5
Lambda	7813	39	37	61	30	47	51	51	36	70	36	61	81
Lambda	7828	0	0	0	1	1	1	0	1	1	3	1	1
Lambda	7837	14	13	18	13	10	5	15	19	17	12	9	14
Lambda	7895	106	82	90	88	97	106	91	84	93	104	116	98
Lambda	7905	0	2	1	0	1	2	0	0	0	1	0	0
Lambda	7940	0	0	1	0	0	0	0	0	0	1	0	1
Lambda	7960	13	6	10	20	6	11	17	13	5	17	10	7
Lambda	8035	12	6	7	10	19	11	9	13	9	10	10	9
Lambda	8048	0	0	0	0	0	1	0	0	0	0	0	0
Lambda	8051	0	0	0	0	1	0	0	0	0	0	0	0
Lambda	8067	17	8	7	3	15	12	19	5	30	16	12	4
Lambda	8081	31	33	39	30	43	31	21	62	31	46	32	38
Lambda	8130	73	59	63	59	47	29	46	83	47	34	54	57
Lambda	8182	13	11	7	12	25	18	19	10	7	17	11	13
Lambda	8205	5	11	12	11	14	15	16	6	9	19	12	12
Lambda	8239	0	2	0	3	5	6	1	4	1	7	1	4
Lambda	8241	0	0	0	1	2	3	0	0	1	4	0	1
Lambda	8256	51	79	74	65	94	90	105	104	78	110	67	67
Lambda	8259	0	2	0	1	1	1	2	4	0	0	2	1
Lambda	8303	1	5	3	4	7	4	2	7	1	2	2	4
Lambda	8339	7	12	15	11	10	12	23	18	9	19	12	10
Lambda	8342	22	38	31	29	31	33	29	38	35	24	28	29
Lambda	8370	55	29	62	34	21	23	61	52	65	42	43	58
Lambda	8440	7	3	4	8	8	9	9	10	2	13	8	8
Lambda	8446	0	0	0	0	0	0	0	0	0	0	0	0
Lambda	8478	0	2	1	0	0	2	0	2	0	1	0	0
Lambda	8493	1	1	3	2	4	11	4	2	2	1	3	9
Lambda	8518	111	84	89	131	86	135	102	95	70	167	123	138
Lambda	8608	51	44	48	37	46	39	60	32	37	60	53	37
Lambda	8616	4	3	3	7	8	13	2	1	2	3	4	7
Lambda	8635	0	2	1	0	6	12	2	2	2	3	1	2
Lambda	8652	0	0	0	0	0	1	0	0	0	1	0	0
Lambda	8661	6	8	10	10	12	6	8	5	10	9	9	12
Lambda	8683	46	24	64	45	25	43	29	15	34	20	31	63
Lambda	8686	32	11	17	42	54	39	19	18	24	30	35	24
Lambda	8730	17	16	22	25	15	29	14	11	15	14	7	19
Lambda	8769	24	23	10	20	39	17	27	28	11	34	39	17
Lambda	8801	1	0	0	4	0	1	1	1	0	3	1	0
Lambda	8811	5	7	10	16	15	22	9	3	8	15	16	17
Lambda	8829	22	17	24	25	10	9	30	15	13	17	16	12
Lambda	8866	3	1	1	3	2	7	3	3	1	7	3	1
Lambda	8879	48	31	58	44	25	46	42	40	65	28	21	42
Lambda	8882	61	51	55	70	63	55	52	53	43	50	49	59
Lambda	8895	28	16	16	24	24	23	20	16	15	22	25	23
Lambda	8980	9	19	16	22	24	18	17	19	19	15	24	16
Lambda	8993	7	6	12	6	6	6	12	5	8	8	10	9
Lambda	9023	0	0	0	0	0	1	1	0	0	0	0	0
Lambda	9043	7	9	20	10	6	11	20	9	6	7	7	11
Lambda	9053	7	5	5	13	7	9	6	9	5	4	5	7
Lambda	9095	118	160	126	116	110	125	157	129	124	102	116	119
Lambda	9107	8	8	12	20	7	13	18	11	5	22	8	13
Lambda	9164	93	88	138	84	80	60	87	117	83	84	70	94
Lambda	9185	0	3	4	12	1	6	0	7	4	13	6	4
Lambda	9218	4	2	3	5	6	13	0	11	8	8	7	4
Lambda	9238	12	7	7	8	5	6	7	9	9	9	7	10
Lambda	9285	5	5	4	10	10	13	3	7	6	5	12	9
Lambda	9343	0	0	0	0	0	0	0	0	1	0	0	0
Lambda	9369	7	9	16	25	17	16	18	28	8	30	15	17
Lambda	9396	13	19	24	34	22	16	11	24	24	14	19	25
Lambda	9433	21	11	16	22	19	26	9	15	21	25	21	22
Lambda	9440	118	109	105	87	100	97	121	99	125	109	119	105
Lambda	9514	102	144	106	72	147	83	112	85	125	66	125	85
Lambda	9544	0	0	1	2	0	3	1	1	0	2	1	1
Lambda	9553	1	1	1	3	0	1	1	2	4	1	3	1
Lambda	9634	19	41	31	48	25	20	33	48	17	40	24	29
Lambda	9644	26	14	16	13	18	23	33	7	25	32	23	18
Lambda	9664	0	0	0	0	0	0	0	0	0	0	0	0
Lambda	9686	0	0	1	0	0	6	0	0	0	2	0	0
Lambda	9698	100	53	92	105	52	65	111	78	47	85	79	91
Lambda	9783	167	128	181	172	144	172	149	178	105	177	162	168
Lambda	9826	5	4	5	11	13	14	6	9	4	7	6	11
Lambda	9843	44	42	40	35	31	28	41	10	48	35	41	51
Lambda	9875	13	24	22	19	25	29	25	9	31	22	16	34
Lambda	9878	23	10	16	12	26	29	14	8	18	24	16	15
Lambda	9916	1	3	1	4	4	3	2	0	3	3	0	1
Lambda	10016	3	2	4	2	6	9	1	2	5	3	4	4
Lambda	10026	16	13	16	21	13	13	29	14	7	26	21	14
Lambda	10085	92	30	78	32	72	57	55	43	70	30	56	59
Lambda	10091	2	1	1	3	4	11	0	2	3	7	1	3
Lambda	10108	10	11	13	14	11	10	11	17	7	13	12	12
Lambda	10152	134	212	176	166	213	208	199	238	208	206	190	154
Lambda	10192	97	77	78	67	34	27	77	84	87	39	54	78
Lambda	10226	8	7	9	7	18	24	6	13	10	12	11	14
Lambda	10279	18	18	24	25	17	8	17	19	11	17	21	23
Lambda	10287	0	1	1	0	4	3	0	2	0	0	2	1
Lambda	10320	11	36	22	45	31	29	19	47	17	53	30	23
Lambda	10332	0	0	0	0	0	0	0	0	0	0	0	0
Lambda	10355	18	25	40	28	32	26	25	16	40	15	20	31
Lambda	10358	42	75	75	73	68	62	69	142	49	81	87	54
Lambda	10404	4	7	4	10	7	4	2	9	1	2	9	2
Lambda	10417	50	113	82	61	59	68	86	77	90	79	75	78
Lambda	10427	0	0	0	0	0	0	0	0	0	0	0	0
Lambda	10437	1	0	1	2	2	3	1	0	0	3	0	1
Lambda	10459	0	0	0	0	0	0	0	0	0	0	0	0
Lambda	10467	32	29	25	16	41	50	50	17	21	21	41	51
Lambda	10476	7	6	7	12	8	8	11	9	5	19	14	13
Lambda	10495	0	1	1	2	0	1	0	0	0	0	0	0
Lambda	10538	34	42	46	25	27	26	46	33	31	28	38	39
Lambda	10552	27	28	34	34	35	50	38	24	28	67	45	48
Lambda	10588	12	19	15	25	13	18	16	21	16	23	18	20
Lambda	10663	8	7	13	9	6	11	7	9	10	10	12	9
Lambda	10696	124	106	109	124	129	202	137	74	142	198	121	125
Lambda	10714	1	0	1	0	0	4	0	0	2	1	1	3
Lambda	10742	17	12	19	14	21	14	11	20	10	17	13	9
Lambda	10775	20	13	32	30	22	37	18	30	27	18	26	31
Lambda	10796	18	9	13	14	13	23	18	9	18	11	12	15
Lambda	10856	23	20	16	30	15	24	25	16	14	26	22	18
Lambda	10886	73	82	70	60	61	50	87	89	94	46	67	83
Lambda	10927	21	15	10	16	18	21	14	13	18	15	12	10
Lambda	10937	23	15	35	21	19	22	22	8	32	17	16	30
Lambda	10942	45	33	43	52	51	52	46	48	47	38	45	50
Lambda	11009	71	77	99	74	42	41	81	80	64	57	62	71
Lambda	11020	24	36	32	36	30	23	31	47	35	29	37	34
Lambda	11060	107	72	98	62	84	68	69	85	88	58	88	97
Lambda	11068	10	17	7	10	11	11	11	17	12	9	12	6
Lambda	11080	0	1	2	1	2	6	0	0	2	1	1	1
Lambda	11108	82	74	101	81	77	98	95	89	77	67	91	108
Lambda	11122	0	0	0	0	0	0	0	0	0	1	0	1
Lambda	11132	3	8	7	5	4	4	7	9	4	9	3	3
Lambda	11170	55	73	74	63	56	71	74	124	47	75	55	60
Lambda	11189	99	84	99	70	67	71	78	73	117	65	71	91
Lambda	11245	20	14	26	31	19	27	21	25	24	25	16	15
Lambda	11282	14	26	32	35	26	33	21	28	38	15	25	29
Lambda	11290	18	19	12	27	24	20	10	11	10	15	21	17
Lambda	11327	55	73	62	47	59	65	47	60	66	72	77	71
Lambda	11339	28	30	20	18	27	22	30	10	32	20	23	25
Lambda	11353	0	0	0	0	0	3	0	0	2	1	0	1
Lambda	11366	0	0	0	0	0	0	0	0	0	0	0	0
Lambda	11394	0	0	0	0	0	0	0	0	0	0	0	0
Lambda	11397	8	7	11	8	3	9	7	3	12	10	12	8
Lambda	11446	96	118	117	95	103	112	122	114	113	118	111	107
Lambda	11448	25	43	43	29	21	19	52	47	54	22	30	33
Lambda	11473	0	0	0	0	0	0	0	0	0	0	0	0
Lambda	11501	38	50	46	52	24	27	54	75	19	35	35	43
Lambda	11503	70	117	117	137	63	59	84	121	61	77	77	96
Lambda	11565	33	39	34	71	46	19	52	41	21	67	30	29
Lambda	11596	0	0	1	0	0	1	0	0	1	1	1	1
Lambda	11598	1	2	1	0	0	1	0	0	1	1	0	1
Lambda	11602	0	0	0	0	0	0	0	0	0	0	0	0
Lambda	11638	30	22	28	27	37	53	39	12	35	51	33	40
Lambda	11648	9	6	9	10	11	7	7	13	3	4	12	4
Lambda	11692	89	110	127	98	78	82	77	141	82	93	95	115
Lambda	11743	123	83	81	94	97	105	60	33	83	54	91	94
Lambda	11773	0	0	0	0	0	1	0	0	0	0	0	0
Lambda	11789	3	2	7	7	6	1	4	9	1	6	2	6
Lambda	11842	9	1	7	6	9	7	2	5	4	4	7	4
Lambda	11863	1	0	1	0	2	0	3	2	0	2	2	1
Lambda	11866	0	2	0	2	1	1	0	1	2	3	1	1
Lambda	11929	31	28	35	40	31	39	35	49	29	44	31	38
Lambda	11988	158	101	108	123	102	96	87	100	117	102	110	127
Lambda	12008	0	0	0	3	1	1	0	2	0	1	0	1
Lambda	12036	3	6	4	8	6	8	4	1	6	3	10	7
Lambda	12039	6	4	4	8	4	4	9	3	6	3	11	6
Lambda	12055	0	0	0	0	0	1	0	0	0	0	0	0
Lambda	12070	1	1	1	0	0	3	1	0	2	3	1	1
Lambda	12085	16	20	7	17	21	11	8	15	20	13	11	13
Lambda	12088	51	69	55	49	72	73	51	53	57	66	68	59
Lambda	12093	3	2	6	4	3	6	2	2	5	2	3	4
Lambda	12130	73	69	77	138	55	37	44	77	54	48	71	76
Lambda	12190	11	11	14	15	11	14	10	26	12	19	7	10
Lambda	12201	41	14	34	39	20	29	34	24	15	29	27	41
Lambda	12211	2	2	9	3	4	7	3	0	10	1	1	7
Lambda	12217	52	77	42	70	67	80	77	60	66	68	80	56
Lambda	12226	0	0	0	0	0	1	0	2	0	1	0	0
Lambda	12263	0	0	1	0	0	6	0	0	0	4	2	1
Lambda	12282	37	38	29	23	47	26	40	16	36	14	41	38
Lambda	12297	6	7	6	7	7	5	10	3	7	8	7	7
Lambda	12327	4	12	10	28	19	42	6	6	14	16	11	19
Lambda	12355	0	0	0	0	0	0	0	0	1	0	0	0
Lambda	12361	13	4	11	15	11	7	13	9	11	16	13	4
Lambda	12371	3	0	4	3	4	3	3	4	2	7	6	9
Lambda	12400	0	0	0	0	0	0	0	0	0	0	0	0
Lambda	12419	4	0	3	4	5	18	5	3	1	17	1	6
Lambda	12446	28	36	43	42	20	21	38	13	42	22	31	38
Lambda	12470	61	24	55	67	44	75	30	35	26	64	45	72
Lambda	12541	2	1	0	1	5	6	1	1	2	5	2	3
Lambda	12554	62	41	54	22	27	39	47	27	51	30	37	42
Lambda	12573	117	122	89	107	157	159	112	133	98	135	108	97
Lambda	12659	77	51	75	64	83	78	71	55	46	55	61	74
Lambda	12668	4	0	1	5	2	6	0	0	0	0	0	1
Lambda	12683	0	0	0	0	1	0	0	0	0	0	0	0
Lambda	12686	57	76	34	37	63	46	68	26	56	44	75	40
Lambda	12692	1	2	4	1	0	4	2	2	4	4	4	3
Lambda	12701	0	0	1	0	0	0	0	2	0	0	0	0
Lambda	12719	0	0	0	0	0	0	0	0	0	0	0	0
Lambda	12724	0	0	0	0	0	0	0	0	0	0	0	0
Lambda	12746	52	51	73	67	62	61	97	42	51	66	49	59
Lambda	12764	69	58	61	40	44	41	64	34	43	30	35	40
Lambda	12767	0	0	0	0	1	0	0	0	0	0	0	0
Lambda	12784	13	11	7	17	5	5	5	14	4	10	7	10
Lambda	12834	71	86	83	60	56	33	55	84	61	37	59	78
Lambda	12858	0	0	0	0	0	1	0	1	1	1	0	0
Lambda	12867	0	0	0	2	0	4	0	0	0	1	1	1
Lambda	12869	0	0	1	0	2	2	0	0	1	0	1	0
Lambda	12881	1	0	0	0	0	1	0	1	1	1	0	3
Lambda	12884	0	1	0	1	0	2	0	0	0	2	0	1
Lambda	12901	0	2	1	6	6	8	1	1	1	3	3	4
Lambda	12921	0	1	1	5	2	5	1	1	1	3	2	1
Lambda	12935	23	33	42	43	27	22	29	34	32	39	23	38
Lambda	12940	1	1	0	1	2	3	0	0	0	0	2	1
Lambda	13000	104	90	104	79	71	80	104	77	108	63	68	87
Lambda	13015	0	0	0	0	1	2	0	0	0	0	0	0
Lambda	13032	20	7	14	21	23	14	17	19	10	32	16	10
Lambda	13088	93	162	146	158	117	118	121	184	135	148	116	132
Lambda	13112	0	0	0	5	1	6	1	0	1	5	2	1
Lambda	13129	2	1	2	6	2	3	2	3	1	2	2	3
Lambda	13169	2	1	0	1	0	2	2	0	0	2	1	1
Lambda	13197	1	1	1	7	17	34	2	2	6	12	7	3
Lambda	13204	30	27	43	38	24	27	25	22	37	49	25	29
Lambda	13227	12	13	20	21	11	18	13	10	11	27	15	11
Lambda	13323	10	6	7	8	8	6	3	4	6	10	9	7
Lambda	13337	0	0	0	0	0	0	0	0	0	0	0	0
Lambda	13357	77	82	72	87	62	81	56	29	59	50	91	89
Lambda	13373	0	0	0	0	0	0	0	0	0	0	0	1
Lambda	13402	19	25	31	43	24	18	22	13	17	19	29	39
Lambda	13441	10	4	2	3	2	2	5	6	8	5	11	6
Lambda	13472	18	16	13	14	34	26	12	13	15	17	21	10
Lambda	13531	10	1	4	5	1	6	6	5	5	6	7	3
Lambda	13571	121	95	107	73	93	81	104	82	94	103	101	72
Lambda	13620	5	6	10	6	4	6	7	6	3	3	9	12
Lambda	13654	45	50	37	29	61	57	45	40	40	52	64	55
Lambda	13695	32	31	26	31	17	13	41	11	12	26	26	24
Lambda	13703	1	0	1	4	1	8	1	3	1	9	2	4
Lambda	13728	0	0	0	0	0	2	0	0	0	1	0	0
Lambda	13741	120	126	101	72	107	74	120	95	95	68	103	76
Lambda	13772	0	0	0	1	1	2	0	0	0	3	0	2
Lambda	13808	87	104	102	90	89	102	89	82	89	91	102	95
Lambda	13828	0	0	0	2	0	4	0	0	0	2	0	1
Lambda	13834	0	1	2	8	2	6	2	1	1	5	2	1
Lambda	13860	55	45	66	76	43	34	29	28	49	31	39	61
Lambda	13862	18	20	21	19	23	13	16	28	16	19	14	12
Lambda	13908	61	47	61	85	70	92	65	67	65	75	63	62
Lambda	13919	24	15	23	27	12	6	16	12	20	13	14	28
Lambda	13924	5	3	9	6	5	9	6	14	5	2	7	4
Lambda	13962	12	14	13	16	17	13	15	17	18	17	15	18
Lambda	13974	0	0	0	0	0	0	0	0	0	0	0	0
Lambda	13983	0	0	0	0	0	0	0	0	0	1	0	0
Lambda	13988	53	43	42	33	16	21	49	13	44	15	55	45
Lambda	13997	43	37	49	39	33	31	56	92	58	74	47	33
Lambda	14018	0	0	1	2	1	1	0	0	0	0	1	0
Lambda	14058	1	2	1	1	3	1	2	9	1	1	5	1
Lambda	14071	0	0	1	0	0	0	0	0	0	0	0	0
Lambda	14079	2	13	6	8	5	11	2	2	6	4	7	7
Lambda	14094	0	0	0	0	0	0	0	0	0	0	0	0
Lambda	14161	56	36	35	58	44	59	38	29	49	77	72	66
Lambda	14169	0	3	4	2	1	3	1	0	4	0	0	3
Lambda	14179	43	38	53	41	50	56	34	37	63	31	54	59
Lambda	14185	0	0	0	0	0	0	0	0	0	0	0	0
Lambda	14195	0	1	1	1	1	2	0	0	0	2	0	2
Lambda	14215	33	33	27	14	21	18	18	20	30	14	26	26
Lambda	14252	0	0	0	0	0	0	0	0	0	0	0	0
Lambda	14260	0	0	0	0	0	1	0	0	1	0	1	0
Lambda	14283	17	20	29	35	28	18	19	36	27	17	27	33
Lambda	14325	19	14	17	39	32	40	20	16	17	43	30	25
Lambda	14344	36	34	31	29	38	46	29	25	46	21	33	34
Lambda	14375	90	115	98	79	105	58	89	103	91	60	89	72
Lambda	14378	14	20	18	31	18	32	18	16	20	22	21	19
Lambda	14420	78	136	84	96	89	50	86	133	84	67	106	87
Lambda	14441	1	0	1	5	1	8	0	0	2	5	3	5
Lambda	14451	0	0	0	0	0	0	0	0	0	0	0	0
Lambda	14461	9	12	21	17	11	11	6	5	31	4	6	19
Lambda	14465	1	2	1	9	2	7	1	4	3	5	3	4
Lambda	14468	1	0	1	6	4	15	2	2	2	5	2	3
Lambda	14507	3	3	1	3	0	3	0	1	2	2	2	2
Lambda	14526	0	2	1	8	2	8	2	1	3	10	4	0
Lambda	14541	22	17	35	34	27	23	19	28	23	22	23	30
Lambda	14637	18	3	19	19	17	24	15	14	14	26	16	16
Lambda	14646	84	58	41	74	101	83	59	66	77	60	72	60
Lambda	14695	34	24	23	45	14	19	28	43	14	22	26	26
Lambda	14707	0	0	0	1	1	0	0	1	0	0	1	0
Lambda	14807	16	7	14	10	7	9	16	25	18	15	13	22
Lambda	14816	13	13	25	16	27	38	20	16	15	24	14	15
Lambda	14818	25	43	31	26	37	31	60	48	32	50	48	26
Lambda	14857	0	0	0	1	0	0	0	0	0	1	0	1
Lambda	14896	26	24	22	18	50	52	43	23	20	54	38	22
Lambda	14918	72	60	64	42	56	39	53	49	34	42	54	49
Lambda	14967	46	38	46	52	21	12	51	47	24	36	35	49
Lambda	14971	7	9	4	24	19	17	12	10	15	17	8	12
Lambda	14976	1	0	1	0	1	6	0	1	3	1	1	2
Lambda	14984	0	0	0	0	0	0	0	0	1	0	0	0
Lambda	14988	0	0	0	0	0	1	2	2	1	1	0	0
Lambda	14999	1	0	1	2	1	2	1	0	3	1	0	1
Lambda	15027	0	0	0	0	0	0	1	0	0	1	0	0
Lambda	15057	64	66	72	60	58	37	65	89	74	26	41	81
Lambda	15102	12	13	14	22	18	16	16	16	9	18	13	7
Lambda	15111	44	49	37	30	37	44	58	44	51	45	56	35
Lambda	15126	10	13	9	18	19	28	12	16	14	5	9	13
Lambda	15129	43	27	23	17	12	21	46	26	51	21	31	24
Lambda	15168	25	11	15	13	24	15	14	13	19	4	14	15
Lambda	15180	32	20	30	26	25	22	32	49	40	22	19	17
Lambda	15227	174	171	153	198	178	208	150	196	163	193	192	171
Lambda	15361	89	86	74	92	117	121	120	155	82	130	119	108
Lambda	15467	0	0	0	0	1	0	0	0	0	1	0	0
Lambda	15473	0	0	0	0	0	0	0	0	0	0	0	0
Lambda	15477	0	0	0	0	0	1	0	0	0	1	2	0
Lambda	15536	27	34	27	37	29	24	29	43	19	42	32	28
Lambda	15538	148	171	181	190	139	144	131	155	180	154	144	195
Lambda	15617	80	69	83	67	79	79	74	65	77	53	54	97
Lambda	15656	4	0	1	1	1	1	0	1	0	1	2	1
Lambda	15690	0	2	3	12	10	11	1	2	6	3	0	2
Lambda	15709	10	27	18	21	21	17	14	9	22	12	16	18
Lambda	15734	0	0	1	3	1	5	1	0	0	0	1	1
Lambda	15737	12	32	16	24	22	14	20	28	19	9	21	16
Lambda	15756	54	26	55	36	55	38	33	29	52	18	32	57
Lambda	15808	12	10	13	10	8	5	11	14	11	9	12	10
Lambda	15818	4	11	10	6	9	13	3	9	7	9	2	8
Lambda	15841	144	101	132	160	100	111	141	96	93	136	118	135
Lambda	15910	21	10	15	19	13	14	19	15	7	16	16	16
Lambda	15931	15	11	12	17	13	23	7	12	6	17	8	9
Lambda	16022	1	0	1	2	0	1	2	0	0	2	2	0
Lambda	16025	4	4	4	0	5	4	4	5	8	4	2	7
Lambda	16027	68	29	26	30	44	38	25	33	46	24	30	31
Lambda	16042	0	0	0	0	0	3	0	0	0	0	0	1
Lambda	16048	0	2	1	5	4	4	0	4	1	4	2	2
Lambda	16061	28	16	22	15	6	3	16	29	23	9	16	10
Lambda	16219	59	56	81	62	63	72	69	51	95	44	59	79
Lambda	16221	8	15	19	5	8	3	9	16	16	6	8	8
Lambda	16256	0	0	0	0	0	0	0	0	0	0	0	0
Lambda	16264	0	2	1	1	1	7	3	1	7	1	2	2
Lambda	16275	0	0	0	0	1	1	0	0	0	1	0	0
Lambda	16292	6	3	10	13	5	9	6	1	7	5	13	9
Lambda	16301	26	22	37	31	10	6	22	31	31	17	26	25
Lambda	16352	24	31	27	30	19	14	47	74	18	43	24	26
Lambda	16354	74	95	77	90	60	60	55	85	90	59	96	82
Lambda	16372	0	0	0	0	0	1	0	0	1	0	0	1
Lambda	16382	0	0	0	0	0	0	0	0	0	0	0	0
Lambda	16385	0	0	0	1	0	0	0	0	0	0	0	0
Lambda	16403	22	20	31	40	23	23	25	19	18	25	34	25
Lambda	16442	25	23	50	11	14	10	16	28	28	10	21	31
Lambda	16455	0	0	0	3	3	8	1	1	0	7	0	4
Lambda	16466	19	9	10	27	19	19	20	10	14	21	12	29
Lambda	16468	40	48	47	47	33	38	63	118	34	75	47	48
Lambda	16543	47	77	79	73	102	149	76	103	101	92	81	92
Lambda	16553	14	7	22	9	9	9	21	11	20	17	7	23
Lambda	16577	0	2	1	1	0	3	0	1	0	1	0	0
Lambda	16607	0	0	1	1	0	1	0	3	0	1	0	0
Lambda	16621	1	0	1	4	2	1	2	1	1	3	1	1
Lambda	16640	7	6	9	5	11	6	4	6	8	6	7	8
Lambda	16650	1	0	1	0	1	3	1	1	2	2	0	1
Lambda	16652	0	0	3	0	3	3	0	0	2	1	1	1
Lambda	16660	0	0	0	0	0	0	0	0	0	0	0	0
Lambda	16674	54	22	19	36	49	43	18	11	33	23	33	43
Lambda	16687	19	7	13	16	19	11	13	4	11	24	8	10
Lambda	16825	72	20	40	31	42	35	44	40	31	43	40	44
Lambda	16840	0	3	1	2	14	14	3	2	3	6	6	7
Lambda	16842	3	1	5	8	9	19	4	2	5	10	6	4
Lambda	16845	0	2	2	2	0	1	1	0	0	1	1	2
Lambda	16905	43	58	60	58	77	53	45	51	76	47	44	53
Lambda	16928	1	3	1	3	0	1	0	3	3	5	1	4
Lambda	16965	0	0	1	0	1	1	1	1	3	1	0	3
Lambda	16977	16	8	15	10	14	9	20	17	15	6	20	18
Lambda	16994	0	0	0	3	1	8	0	0	0	1	0	0
Lambda	17011	155	132	144	156	96	108	145	189	124	117	135	149
Lambda	17052	11	12	29	20	10	7	14	13	14	12	2	23
Lambda	17058	1	1	2	11	2	14	0	4	2	6	2	4
Lambda	17060	0	5	4	8	4	11	2	1	4	12	3	6
Lambda	17093	44	50	58	40	83	71	74	50	53	75	54	61
Lambda	17203	165	144	135	150	198	198	160	128	180	177	213	149
Lambda	17218	13	8	15	13	11	13	7	9	2	7	8	14
Lambda	17252	10	14	14	18	11	25	8	10	13	10	7	15
Lambda	17265	9	16	13	20	13	16	9	9	12	9	13	8
Lambda	17282	52	32	32	19	44	24	29	12	31	21	48	34
Lambda	17312	44	33	54	61	69	72	41	53	49	68	53	51
Lambda	17357	7	9	4	7	8	5	4	8	5	4	7	6
Lambda	17363	0	0	0	0	0	0	0	0	0	0	0	1
Lambda	17379	0	0	0	0	0	1	0	0	1	0	0	0
Lambda	17400	0	0	0	0	0	0	0	0	0	0	0	1
Lambda	17420	110	122	135	154	128	127	126	98	141	116	139	157
Lambda	17483	25	15	20	16	15	12	13	19	8	18	9	21
Lambda	17500	0	0	0	0	0	0	0	0	0	0	0	0
Lambda	17518	72	56	62	48	99	84	87	44	70	62	70	75
Lambda	17539	4	2	8	9	3	11	4	3	2	3	3	1
Lambda	17555	0	2	0	2	2	6	2	2	0	4	2	4
Lambda	17581	54	50	54	67	58	60	47	48	51	34	44	60
Lambda	17585	1	0	4	9	2	9	0	0	9	6	2	2
Lambda	17615	4	9	5	4	2	3	1	4	9	1	2	4
Lambda	17632	0	3	1	7	4	8	2	2	4	11	3	5
Lambda	17640	1	3	6	12	16	11	5	3	10	9	11	10
Lambda	17645	1	6	3	5	7	8	6	9	4	6	5	5
Lambda	17675	30	36	40	39	41	36	36	36	34	33	30	35
Lambda	17694	1	0	0	1	3	2	1	3	1	3	2	0
Lambda	17702	3	0	2	2	1	4	2	3	3	5	1	1
Lambda	17765	6	5	7	11	8	8	6	16	5	15	11	3
Lambda	17810	27	16	26	20	18	31	23	5	31	13	27	34
Lambda	17826	1	0	1	0	0	2	0	0	0	0	0	0
Lambda	17846	0	0	0	0	0	0	0	0	0	0	0	0
Lambda	17872	21	16	15	29	10	13	29	21	10	27	18	26
Lambda	17936	17	18	25	14	14	29	22	28	18	22	16	26
Lambda	18137	37	31	37	41	45	33	42	50	31	57	35	43
Lambda	18198	8	12	6	9	20	19	16	13	19	22	14	8
Lambda	18224	3	4	8	5	2	9	2	0	4	2	2	4
Lambda	18257	0	1	1	4	5	6	1	2	5	6	3	1
Lambda	18285	1	0	2	1	0	2	0	0	0	0	0	1
Lambda	18298	30	22	25	29	36	66	27	13	36	45	39	22
Lambda	18324	0	0	0	0	0	0	0	0	0	1	0	1
Lambda	18327	0	0	0	0	0	0	0	0	0	0	0	0
Lambda	18338	17	38	34	10	17	8	28	20	41	10	27	23
Lambda	18356	54	74	56	70	47	38	54	54	53	53	51	58
Lambda	18372	0	0	0	1	0	1	0	0	1	0	0	0
Lambda	18383	0	1	0	0	0	1	0	0	0	1	0	1
Lambda	18414	104	114	81	72	66	39	70	74	77	55	73	79
Lambda	18473	7	4	4	5	4	5	4	2	3	5	2	4
Lambda	18503	0	0	0	0	0	0	0	0	0	0	0	0
Lambda	18510	65	41	46	24	43	69	43	15	75	38	28	44
Lambda	18512	0	0	0	0	0	0	0	0	0	0	0	0
Lambda	18521	19	15	20	22	17	18	14	21	23	10	17	18
Lambda	18523	84	91	74	62	68	82	72	66	96	85	83	80
Lambda	18617	21	16	7	24	19	8	14	26	14	23	17	11
Lambda	18623	13	11	19	11	14	14	7	14	4	16	16	22
Lambda	18630	16	46	42	18	17	17	36	43	31	43	35	28
Lambda	18651	0	0	0	0	0	0	0	0	0	0	0	0
Lambda	18662	4	2	4	4	0	2	1	2	7	3	2	4
Lambda	18701	0	0	0	0	0	0	1	0	0	0	0	0
Lambda	18717	115	119	104	73	88	108	101	67	114	73	116	94
Lambda	18719	6	8	6	1	9	7	19	3	10	20	11	7
Lambda	18731	0	0	0	0	0	0	0	0	0	0	0	0
Lambda	18767	21	21	27	25	28	16	26	16	17	21	14	14
Lambda	18780	4	8	3	4	6	6	2	9	8	4	2	8
Lambda	18791	0	0	4	1	0	1	0	2	1	1	0	1
Lambda	18803	1	1	1	1	0	2	0	5	1	5	1	1
Lambda	18830	14	9	18	38	19	20	16	19	13	23	22	21
Lambda	18839	0	0	1	1	3	2	1	1	1	0	0	1
Lambda	18881	34	25	32	47	54	46	20	36	30	32	40	40
Lambda	18924	3	5	5	5	3	0	3	6	1	1	2	1
Lambda	19000	0	1	1	1	2	1	0	1	0	3	0	1
Lambda	19008	0	0	0	0	0	0	1	1	0	0	0	0
Lambda	19023	74	64	80	36	44	43	78	25	73	28	45	76
Lambda	19032	0	0	0	1	0	1	0	0	0	0	0	0
Lambda	19050	2	2	1	3	1	2	0	0	1	1	1	1
Lambda	19080	5	2	3	4	4	10	6	3	3	5	7	5
Lambda	19105	0	1	1	5	2	5	1	2	0	5	2	6
Lambda	19114	0	6	4	5	7	4	9	3	1	8	6	3
Lambda	19141	4	4	3	4	1	3	4	8	2	8	2	7
Lambda	19201	21	33	18	21	37	36	43	44	42	36	30	26
Lambda	19231	6	5	10	11	12	6	9	3	6	12	7	10
Lambda	19242	0	1	0	0	1	2	0	2	0	1	0	0
Lambda	19268	0	0	0	0	0	0	0	0	0	0	0	0
Lambda	19288	28	17	19	18	20	14	19	33	11	11	9	15
Lambda	19293	2	2	2	5	12	9	2	1	5	4	2	7
Lambda	19336	3	3	3	3	3	4	1	3	4	1	0	4
Lambda	19360	7	4	2	3	5	6	1	3	9	6	2	3
Lambda	19399	1	3	1	9	4	4	6	2	1	7	2	3
Lambda	19445	1	3	8	11	9	13	1	15	3	10	7	4
Lambda	19488	0	2	0	1	1	4	1	2	4	3	1	3
Lambda	19528	59	37	53	33	65	51	59	64	53	32	34	55
Lambda	19616	4	1	6	11	2	4	6	9	1	7	7	8
Lambda	19619	11	7	12	14	15	13	13	17	14	9	12	23
Lambda	19625	10	16	13	20	15	28	18	28	10	21	13	14
Lambda	19696	84	60	73	87	78	50	91	78	60	107	73	78
Lambda	19731	9	8	10	12	3	7	5	14	3	11	6	4
Lambda	19777	39	45	62	46	61	45	54	80	38	52	60	56
Lambda	19787	47	38	64	55	41	35	58	77	32	47	40	61
Lambda	19865	47	59	81	43	40	53	46	46	58	29	46	54
Lambda	19897	18	19	25	44	27	11	11	13	16	13	18	29
Lambda	19944	21	31	25	24	30	26	31	64	19	26	18	21
Lambda	19948	16	27	40	25	24	18	20	25	24	21	27	26
Lambda	19990	75	140	93	110	93	71	96	139	81	98	105	89
Lambda	20042	110	132	142	129	78	82	140	111	117	93	107	102
Lambda	20074	15	16	16	19	28	13	9	19	18	15	16	25
Lambda	20108	42	42	48	52	53	36	69	52	34	45	54	67
Lambda	20111	4	7	4	1	8	4	3	13	6	4	6	4
Lambda	20119	3	7	5	9	9	16	2	0	10	4	6	8
Lambda	20123	13	6	10	13	10	4	7	6	11	4	8	10
Lambda	20126	47	38	45	32	25	21	41	54	43	15	49	38
Lambda	20162	12	26	30	17	13	4	16	24	17	9	12	18
Lambda	20165	42	57	33	74	76	66	49	36	63	52	55	51
Lambda	20173	0	0	0	0	0	0	0	0	1	0	0	0
Lambda	20197	0	0	0	1	0	0	0	3	0	1	0	0
Lambda	20210	0	0	0	0	0	0	0	0	1	0	0	0
Lambda	20216	0	0	0	0	0	0	0	0	0	0	0	0
Lambda	20236	0	1	3	0	1	4	2	0	2	2	1	1
Lambda	20239	0	0	0	0	0	0	0	0	0	0	0	0
Lambda	20252	24	27	21	15	37	28	44	14	28	37	32	18
Lambda	20257	0	0	0	1	0	0	0	0	0	0	0	0
Lambda	20266	2	3	1	5	4	9	2	3	2	2	7	4
Lambda	20303	0	0	2	0	0	0	0	1	0	0	0	0
Lambda	20308	5	3	8	5	5	8	3	5	8	3	7	4
Lambda	20321	1	7	6	0	7	6	13	6	14	5	8	8
Lambda	20323	6	3	5	4	4	4	7	5	6	6	4	2
Lambda	20345	0	0	1	0	1	0	0	0	0	1	0	0
Lambda	20365	1	0	3	3	10	8	0	4	1	9	2	4
Lambda	20420	113	64	118	61	59	65	91	63	94	60	66	93
Lambda	20446	1	0	1	3	7	8	0	1	1	3	1	1
Lambda	20467	0	3	3	0	2	0	2	5	0	1	4	1
Lambda	20476	16	17	11	14	14	19	12	7	13	15	19	12
Lambda	20512	3	2	2	0	1	0	0	2	0	0	1	1
Lambda	20522	13	4	8	7	13	44	13	1	12	7	16	11
Lambda	20531	0	0	0	0	0	0	0	0	0	0	0	1
Lambda	20533	8	5	14	5	9	11	9	7	24	5	7	7
Lambda	20551	0	0	0	1	0	0	0	0	0	0	0	0
Lambda	20554	0	2	1	1	2	1	3	1	3	1	2	1
Lambda	20557	3	10	7	14	8	6	14	29	16	7	5	5
Lambda	20599	4	9	10	11	12	6	7	7	11	7	10	8
Lambda	20608	0	1	0	0	0	0	0	1	0	1	0	0
Lambda	20635	0	0	0	0	0	0	0	0	0	0	0	0
Lambda	20644	0	0	0	0	0	0	0	0	0	0	0	0
Lambda	20647	0	0	0	1	0	0	0	0	0	0	0	0
Lambda	20655	8	2	4	6	6	19	14	7	14	9	13	8
Lambda	20676	1	0	0	0	0	0	1	0	0	0	0	0
Lambda	20704	62	41	49	61	23	39	58	38	59	47	56	59
Lambda	20716	4	1	3	9	2	1	5	2	2	4	5	4
Lambda	20767	8	16	9	11	10	26	6	8	11	7	13	8
Lambda	20797	2	8	1	3	4	2	1	1	0	1	2	3
Lambda	20847	64	41	29	39	23	26	33	19	36	26	27	29
Lambda	20857	6	2	6	5	9	13	1	2	10	7	5	7
Lambda	20878	0	0	1	2	4	16	1	2	1	7	5	1
Lambda	20880	16	33	28	33	18	28	33	40	25	27	30	26
Lambda	20917	0	0	0	0	0	0	0	0	0	0	0	0
Lambda	20932	11	30	23	32	24	24	24	28	28	22	25	24
Lambda	20992	19	18	25	28	7	17	13	11	17	11	19	21
Lambda	20997	68	52	54	67	79	62	34	49	65	38	64	47
Lambda	21039	6	3	11	9	1	9	2	2	14	5	4	13
Lambda	21045	2	0	2	4	0	3	2	0	1	0	1	4
Lambda	21078	74	48	37	35	54	106	58	20	58	57	66	47
Lambda	21123	0	0	0	0	1	0	0	2	0	1	0	1
Lambda	21136	24	13	18	17	23	21	12	9	13	20	25	21
Lambda	21220	22	7	14	12	12	6	7	5	7	6	7	12
Lambda	21240	3	3	5	4	5	6	2	0	4	3	0	6
Lambda	21249	42	25	38	41	70	100	36	27	38	78	43	46
Lambda	21289	8	5	10	5	8	17	10	12	9	7	9	11
Lambda	21400	7	6	5	5	6	8	7	4	5	10	7	4
Lambda	21406	4	3	6	3	7	3	6	10	0	4	9	7
Lambda	21472	89	73	81	77	77	75	81	72	89	64	85	83
Lambda	21592	11	2	6	9	10	15	11	7	5	10	10	7
Lambda	21607	4	7	6	3	12	13	7	4	6	5	2	8
Lambda	21609	31	10	14	10	25	19	25	20	25	34	13	23
Lambda	21778	86	41	63	47	34	36	66	47	57	50	49	52
Lambda	21796	0	0	0	0	0	0	0	0	0	0	0	1
Lambda	21807	0	0	1	3	4	22	1	0	3	11	1	2
Lambda	21828	0	0	0	1	0	0	0	0	1	0	0	1
Lambda	21840	34	22	22	23	19	15	20	21	28	17	18	32
Lambda	21912	7	2	3	9	4	7	7	9	6	3	7	5
Lambda	21921	3	12	12	17	10	11	9	90	10	26	15	8
Lambda	22029	0	0	0	0	0	0	1	0	0	0	0	0
Lambda	22070	0	0	0	4	0	0	0	0	1	2	1	0
Lambda	22080	2	3	4	2	8	8	3	8	2	3	3	7
Lambda	22112	0	0	0	2	2	3	0	1	0	3	0	0
Lambda	22124	19	16	24	17	32	30	35	16	19	22	29	36
Lambda	22206	2	1	1	0	0	2	1	0	1	1	1	4
Lambda	22215	18	24	28	30	20	21	33	32	18	32	23	21
Lambda	22253	0	0	0	0	2	0	1	2	1	1	2	1
Lambda	22277	3	2	1	3	1	1	2	1	0	1	1	2
Lambda	22345	7	9	8	12	12	10	13	10	10	20	5	10
Lambda	22351	0	0	0	1	0	1	2	1	4	1	1	0
Lambda	22358	0	0	0	0	0	0	0	0	0	1	1	0
Lambda	22406	128	63	77	83	77	115	60	51	107	62	70	95
Lambda	22409	21	9	15	19	12	13	11	19	13	22	17	18
Lambda	22574	0	0	1	2	2	0	0	0	0	0	1	2
Lambda	22582	0	2	2	0	1	2	2	2	1	1	3	2
Lambda	22597	0	0	0	0	0	0	0	0	0	0	0	0
Lambda	22604	0	0	0	0	0	0	0	0	0	0	0	0
Lambda	22712	5	1	1	6	3	2	5	3	1	8	1	1
Lambda	23798	0	0	0	0	0	0	0	0	0	0	0	0
Lambda	24136	2	12	1	4	0	1	2	4	0	3	2	3
Lambda	24163	1	0	1	0	0	0	1	0	0	1	0	0
Lambda	24171	3	0	1	2	0	1	0	1	0	1	0	0
Lambda	24186	7	1	1	9	5	6	7	7	5	3	5	10
Lambda	24193	0	0	0	0	0	0	0	3	0	0	0	0
Lambda	24220	3	1	4	4	3	4	5	5	3	5	8	3
Lambda	24340	53	37	24	63	38	26	50	39	33	34	46	34
Lambda	24345	8	7	12	16	13	12	13	9	6	17	15	15
Lambda	24358	3	4	2	3	4	21	7	8	6	3	11	10
Lambda	24423	16	12	17	29	10	8	20	13	11	17	22	15
Lambda	24644	0	2	0	1	4	1	0	1	1	1	1	0
Lambda	24649	11	11	12	23	11	11	9	10	9	16	16	8
Lambda	24806	31	36	32	23	26	24	27	31	37	26	22	28
Lambda	24836	0	2	0	1	1	5	2	0	1	6	3	2
Lambda	24844	0	0	0	0	1	0	1	0	0	0	1	0
Lambda	24969	6	4	5	10	9	9	11	10	10	17	7	5
Lambda	25123	0	0	0	0	0	0	0	0	0	0	0	0
Lambda	25615	1	0	0	1	1	1	0	0	0	2	0	0
Lambda	25964	0	0	0	0	0	0	0	0	0	1	0	0
Lambda	26114	2	2	1	0	2	0	1	2	1	3	3	1
Lambda	26387	2	0	1	4	5	5	0	0	1	3	2	1
Lambda	26466	0	0	0	0	0	0	0	0	0	0	0	0
Lambda	26531	2	2	4	4	4	9	0	3	9	1	3	4
Lambda	26943	0	0	0	0	0	0	0	0	0	0	0	0
Lambda	27003	0	0	0	0	0	0	0	0	0	0	0	0
Lambda	27017	0	0	1	1	0	0	0	0	0	1	0	0
Lambda	27060	0	0	0	0	0	0	0	0	0	0	0	0
Lambda	27325	0	0	0	0	0	0	0	0	0	0	1	0
Lambda	27363	7	1	2	10	1	2	3	1	6	7	3	5
Lambda	27548	0	0	0	1	0	1	0	0	0	1	0	0
Lambda	27572	2	4	1	10	3	1	5	2	1	11	6	1
Lambda	27711	0	0	0	0	0	0	0	0	0	0	0	0
Lambda	27951	46	62	93	79	82	76	66	66	67	66	79	83
Lambda	27971	0	0	0	0	0	1	0	0	0	1	0	0
Lambda	28009	37	60	21	36	25	12	56	46	19	45	47	32
Lambda	28011	31	43	32	29	26	33	25	23	21	19	26	38
Lambda	28036	37	37	30	28	27	46	42	15	36	35	55	34
Lambda	28046	0	0	0	0	0	0	0	0	0	0	0	0
Lambda	28081	0	0	0	0	0	0	0	0	0	1	0	0
Lambda	28255	82	84	120	108	57	47	97	100	75	79	84	108
Lambda	28375	142	162	182	187	122	120	151	204	188	146	152	176
Lambda	28472	10	11	13	13	19	10	8	15	14	9	13	11
Lambda	28508	8	4	1	7	5	1	3	5	1	5	10	3
Lambda	28658	0	0	1	1	0	0	0	0	0	0	0	0
Lambda	28854	19	10	18	15	15	18	13	12	26	3	7	16
Lambda	28857	32	20	21	47	53	48	30	21	16	64	35	22
Lambda	28938	0	0	1	2	0	1	1	0	0	2	1	0
Lambda	28977	13	4	16	14	14	13	15	9	12	15	16	14
Lambda	29038	9	9	15	12	19	21	4	14	27	3	4	17
Lambda	29090	4	2	1	6	1	2	1	4	3	5	6	2
Lambda	29113	0	0	0	0	0	0	0	0	0	0	0	0
Lambda	29123	0	0	0	0	0	0	0	0	1	1	0	0
Lambda	29165	0	0	1	0	0	0	0	0	0	0	0	0
Lambda	29184	23	15	16	29	36	39	30	16	14	35	26	26
Lambda	29226	4	2	4	5	1	4	2	2	1	3	2	3
Lambda	29310	0	0	0	0	0	0	0	0	0	0	0	1
Lambda	29341	25	12	16	15	17	13	16	22	23	30	14	18
Lambda	29592	22	6	9	11	12	13	13	9	12	15	10	12
Lambda	29989	34	32	27	40	39	41	26	34	32	57	34	29
Lambda	30210	59	19	37	55	29	29	36	28	34	77	38	48
Lambda	30235	14	4	4	10	8	6	7	11	9	8	7	7
Lambda	30360	51	43	40	65	38	29	34	54	47	50	45	34
Lambda	30543	9	1	1	3	7	8	2	3	4	6	4	6
Lambda	30546	105	28	49	47	44	85	30	23	70	26	40	64
Lambda	30567	0	0	3	1	0	1	1	0	1	0	0	1
Lambda	30797	37	21	25	44	27	35	25	27	29	54	15	27
Lambda	30834	5	7	1	11	4	7	5	0	3	1	7	4
Lambda	30844	58	24	46	92	19	19	21	29	32	36	22	38
Lambda	30976	6	7	10	11	22	9	8	3	6	3	14	3
Lambda	31073	3	3	5	8	8	6	7	9	1	15	14	4
Lambda	31080	5	2	2	5	1	1	1	2	0	5	3	1
Lambda	31233	5	0	3	11	3	6	1	8	2	13	3	5
Lambda	31270	1	5	2	6	3	0	2	4	0	3	5	4
Lambda	31318	11	5	3	20	8	14	3	4	3	13	7	12
Lambda	31326	1	3	3	2	1	0	4	2	2	3	2	4
Lambda	31417	69	77	45	42	48	63	57	57	57	67	50	42
Lambda	31457	1	0	0	2	0	1	1	0	1	3	0	2
Lambda	31498	1	5	4	3	1	5	2	4	1	7	4	5
Lambda	31601	56	52	38	51	53	56	54	64	41	52	52	51
Lambda	31619	45	45	56	38	25	28	49	53	40	30	28	51
Lambda	31686	22	6	4	12	6	12	12	18	5	19	12	15
Lambda	31740	27	24	42	26	9	23	28	12	17	15	19	32
Lambda	31816	44	47	61	48	37	45	57	51	26	57	42	75
Lambda	31827	17	33	25	15	17	16	35	50	24	20	24	15
Lambda	31890	55	88	60	67	62	60	82	34	67	80	74	56
Lambda	31895	0	0	1	3	0	1	0	0	0	1	1	1
Lambda	31911	1	4	7	6	3	7	4	3	6	5	7	4
Lambda	31929	14	11	8	11	17	18	18	15	6	15	21	10
Lambda	31998	36	38	73	39	29	25	51	72	38	35	33	56
Lambda	32020	44	21	35	26	46	41	41	29	49	39	33	51
Lambda	32048	3	1	2	4	1	3	1	3	1	3	0	3
Lambda	32122	27	37	54	52	28	39	53	54	45	54	28	37
Lambda	32145	3	6	5	7	2	2	5	8	5	7	7	1
Lambda	32223	3	4	4	10	7	7	4	4	5	12	6	7
Lambda	32241	0	1	0	1	0	2	0	0	0	3	2	0
Lambda	32248	0	0	0	0	0	1	0	0	1	0	0	0
Lambda	32281	54	20	31	48	32	48	38	23	33	48	39	38
Lambda	32356	6	7	6	8	13	14	10	21	14	19	13	8
Lambda	32428	5	7	10	10	5	10	19	20	14	16	8	6
Lambda	32431	0	0	0	0	1	0	0	0	0	0	0	0
Lambda	32482	6	2	1	8	1	4	2	3	2	3	3	1
Lambda	32491	27	14	12	32	23	12	12	14	15	17	29	18
Lambda	32560	2	0	2	9	4	4	3	12	2	7	11	4
Lambda	32586	46	45	44	48	36	30	54	32	43	40	36	55
Lambda	32685	140	94	119	163	109	114	91	94	72	154	122	135
Lambda	32767	23	22	35	39	26	60	27	42	32	53	27	30
Lambda	32871	9	6	18	14	3	14	8	7	19	15	14	15
Lambda	32889	73	29	48	81	55	65	43	28	39	60	65	61
Lambda	33065	187	177	149	178	153	180	141	178	205	165	162	158
Lambda	33148	6	20	20	22	25	24	16	33	18	31	22	12
Lambda	33158	9	15	5	5	5	9	9	5	9	14	13	7
Lambda	33384	3	9	12	10	4	12	2	6	8	3	7	5
Lambda	33522	0	2	1	1	1	1	1	3	0	4	2	0
Lambda	33531	0	0	0	0	0	0	0	0	0	0	0	0
Lambda	33541	0	1	0	1	0	0	0	0	0	0	0	0
Lambda	33725	8	5	5	16	3	4	7	3	4	13	6	5
Lambda	33832	0	0	1	0	0	1	1	1	0	0	1	0
Lambda	34381	0	0	0	1	1	0	0	0	0	0	0	0
Lambda	34718	6	2	7	10	7	7	5	9	8	13	9	8
Lambda	34823	65	29	31	39	36	51	26	23	28	44	33	38
Lambda	35093	29	21	14	23	14	21	23	39	24	48	25	23
Lambda	35122	34	15	16	28	32	34	23	14	26	39	35	28
Lambda	35134	40	47	46	55	29	49	33	45	29	71	35	48
Lambda	35143	1	1	5	7	2	3	1	4	1	3	2	4
Lambda	35210	13	7	18	20	13	14	15	10	14	20	20	20
Lambda	35257	0	0	0	0	0	0	0	0	0	0	0	0
Lambda	35273	44	56	59	84	52	71	74	36	34	107	85	49
Lambda	35327	50	70	79	76	58	64	71	121	85	73	85	61
Lambda	35332	6	10	15	6	14	24	8	6	18	5	9	17
Lambda	35338	5	8	10	0	10	5	17	9	14	9	5	9
Lambda	35341	10	1	1	5	1	1	2	5	1	1	2	2
Lambda	35425	33	29	19	24	27	33	41	50	22	54	35	22
Lambda	35451	113	100	65	136	99	46	87	121	70	104	88	61
Lambda	35597	22	11	11	31	10	7	13	26	5	9	18	10
Lambda	35621	0	0	0	0	0	0	0	0	0	0	0	0
Lambda	35641	0	0	0	0	0	0	0	0	0	0	0	0
Lambda	35809	17	14	13	10	9	14	12	9	19	12	8	12
Lambda	35812	24	14	8	33	44	48	26	26	14	40	18	23
Lambda	35821	0	0	0	0	2	2	0	0	1	1	0	0
Lambda	35929	2	1	5	4	3	2	6	3	3	6	4	5
Lambda	35956	8	5	14	21	9	9	8	10	5	12	9	9
Lambda	36051	69	50	43	64	70	74	49	37	50	75	72	52
Lambda	36074	5	3	6	7	6	13	2	12	2	10	7	10
Lambda	36180	8	1	1	8	1	2	3	3	4	5	4	1
Lambda	36211	0	0	0	0	0	0	0	0	0	0	0	0
Lambda	36255	0	0	0	0	1	0	0	0	0	0	0	0
Lambda	36392	44	8	18	29	32	45	24	12	13	38	23	36
Lambda	36442	32	9	6	3	13	12	7	5	8	3	12	6
Lambda	36459	1	0	1	3	1	9	2	2	0	2	1	1
Lambda	36723	57	19	36	43	23	34	29	19	33	26	34	42
Lambda	37059	3	1	0	0	3	2	1	0	0	5	2	1
Lambda	37086	0	0	0	0	0	0	0	0	0	0	0	0
Lambda	37204	38	24	25	29	48	66	25	18	25	45	35	25
Lambda	37236	5	0	4	2	6	6	2	1	0	5	4	1
Lambda	37343	0	0	1	2	0	2	0	0	0	1	3	0
Lambda	37484	41	14	23	25	25	36	21	28	21	38	21	34
Lambda	37560	13	8	10	17	8	6	11	12	6	15	9	4
Lambda	37668	4	6	5	6	7	8	9	6	3	5	7	6
Lambda	37751	0	0	0	0	0	0	0	0	0	0	0	0
Lambda	37891	1	0	1	1	2	1	1	3	2	0	1	0
Lambda	37942	0	0	0	0	0	0	0	0	0	0	0	0
Lambda	37957	0	0	0	0	0	0	0	0	0	0	0	0
Lambda	38007	0	0	0	0	0	0	1	0	0	1	0	1
Lambda	38077	0	1	0	2	1	0	1	1	0	0	1	1
Lambda	38124	15	22	13	11	7	13	11	9	18	13	16	18
Lambda	38195	1	0	0	0	0	0	0	0	0	0	0	1
Lambda	38249	3	0	1	1	7	1	2	4	3	7	4	3
Lambda	38448	13	6	13	14	6	4	2	9	11	13	10	15
Lambda	38571	139	149	126	145	118	162	101	211	185	154	129	149
Lambda	38610	59	38	42	31	57	33	33	35	53	23	40	44
Lambda	38613	27	16	16	18	19	19	21	24	15	32	28	18
Lambda	38733	109	95	106	100	70	55	123	96	96	77	91	91
Lambda	38811	125	77	81	109	116	126	101	92	75	130	101	113
Lambda	38994	0	0	0	0	0	0	1	0	0	1	0	1
Lambda	39221	51	32	37	49	36	38	38	32	47	47	51	34
Lambda	39240	1	3	1	0	3	1	1	1	0	5	4	0
Lambda	39273	0	0	1	0	0	0	0	2	0	0	0	0
Lambda	39276	2	2	7	4	5	1	11	3	2	9	4	6
Lambda	39358	12	7	12	12	9	13	22	24	7	19	16	6
Lambda	39373	11	11	12	18	8	14	4	11	8	6	9	12
Lambda	39382	6	10	9	5	3	7	7	3	6	6	12	13
Lambda	39391	35	20	28	8	21	18	30	19	29	25	23	24
Lambda	39412	0	0	0	1	1	6	1	0	0	3	2	1
Lambda	39441	103	86	67	68	59	55	80	47	73	54	68	82
Lambda	39447	1	2	1	5	3	10	2	0	1	5	2	3
Lambda	39458	20	14	21	10	26	20	24	2	22	20	20	15
Lambda	39469	12	16	24	22	28	34	25	20	21	38	18	19
Lambda	39596	21	18	16	23	17	16	29	15	5	23	16	15
Lambda	39652	64	67	64	39	41	48	54	95	57	52	50	57
Lambda	39673	0	0	2	5	8	11	0	0	2	5	2	3
Lambda	39691	22	12	22	46	16	23	16	13	18	24	23	18
Lambda	39736	40	42	35	34	42	21	38	33	43	26	35	31
Lambda	39849	70	100	87	93	105	102	113	128	98	175	105	84
Lambda	39890	27	33	37	40	38	56	42	35	45	36	41	47
Lambda	39912	0	2	1	0	3	1	1	1	1	2	1	1
Lambda	39932	8	5	4	9	15	23	8	5	11	15	9	8
Lambda	39935	12	26	14	17	18	22	11	24	26	14	19	20
Lambda	39947	0	1	0	3	1	8	2	1	0	3	5	3
Lambda	39984	1	0	1	1	0	1	1	1	0	1	1	1
Lambda	40003	1	2	4	4	5	18	2	3	2	9	1	3
Lambda	40009	0	0	0	0	0	1	0	0	0	0	0	0
Lambda	40036	22	24	25	21	16	18	21	56	23	13	28	31
Lambda	40074	0	0	0	0	0	0	0	0	0	0	0	0
Lambda	40084	78	47	58	58	55	85	61	58	42	70	68	65
Lambda	40096	0	0	0	0	0	0	1	0	0	0	0	0
Lambda	40115	1	4	7	13	10	4	8	3	8	5	12	6
Lambda	40199	12	5	6	6	4	8	7	7	5	9	7	3
Lambda	40335	40	16	20	53	24	21	28	23	22	39	26	23
Lambda	40338	19	8	20	8	8	9	9	7	9	5	14	15
Lambda	40342	0	0	0	0	0	0	0	0	0	0	0	0
Lambda	40348	0	0	0	0	0	1	0	0	0	0	0	0
Lambda	40350	0	0	0	0	0	0	0	0	0	0	0	0
Lambda	40360	0	0	0	0	0	0	0	0	0	0	0	0
Lambda	40387	2	4	5	9	7	9	5	7	9	3	5	6
Lambda	40389	23	42	12	24	39	13	24	55	20	26	16	14
Lambda	40454	69	64	63	70	56	49	87	77	51	91	65	66
Lambda	40528	20	24	27	19	23	38	32	51	35	36	19	22
Lambda	40548	0	0	0	0	0	0	0	0	0	0	0	0
Lambda	40764	13	7	6	14	13	8	11	9	5	19	9	6
Lambda	40808	5	2	9	5	3	7	5	5	5	9	6	8
Lambda	40874	3	5	4	15	6	8	6	6	6	10	7	5
Lambda	40913	31	14	30	23	11	11	29	23	17	23	22	19
Lambda	40972	2	0	2	0	2	2	2	4	1	1	1	1
Lambda	41104	41	24	34	21	23	28	34	21	42	24	37	34
Lambda	41115	1	2	0	5	1	7	2	3	2	2	0	2
Lambda	41167	2	3	4	3	4	7	3	2	4	3	4	3
Lambda	41176	2	0	1	3	0	1	1	2	0	1	0	0
Lambda	41253	0	0	0	1	0	0	0	0	0	1	0	0
Lambda	41283	37	33	49	49	24	24	30	28	29	20	37	53
Lambda	41395	2	2	5	2	2	6	0	1	3	1	0	4
Lambda	41401	28	19	25	23	17	28	16	17	18	19	18	29
Lambda	41404	44	26	22	22	22	31	25	15	34	9	23	29
Lambda	41484	15	20	25	30	20	21	20	30	15	21	10	21
Lambda	41516	19	12	8	17	17	23	16	10	14	30	18	19
Lambda	41622	11	2	6	14	7	5	7	7	4	13	8	8
Lambda	41881	42	26	28	35	24	28	25	20	15	31	32	33
Lambda	41970	12	13	13	33	12	9	18	14	14	19	16	12
Lambda	41992	0	0	1	1	0	3	0	0	0	1	0	0
Lambda	42034	42	11	11	18	13	9	16	12	8	18	23	15
Lambda	42071	25	14	14	22	16	16	24	15	19	28	23	15
Lambda	42087	12	9	13	16	17	18	2	21	10	11	12	13
Lambda	42197	1	1	3	2	2	2	0	2	4	0	2	1
Lambda	42237	115	79	91	82	92	98	91	96	96	140	110	112
Lambda	42249	4	6	5	3	9	9	2	5	1	1	3	10
Lambda	42321	1	4	2	3	2	6	1	3	2	3	2	1
Lambda	42325	96	143	127	127	129	130	107	100	118	117	108	102
Lambda	42334	15	11	19	26	8	10	16	20	14	13	14	16
Lambda	42364	2	3	4	5	7	4	1	5	3	4	6	3
Lambda	42382	112	157	157	162	125	150	154	201	104	194	126	187
Lambda	42445	35	44	66	73	40	39	49	84	32	52	33	49
Lambda	42474	29	17	40	23	11	6	31	56	16	22	21	31
Lambda	42574	3	1	3	7	7	3	6	2	2	11	9	7
Lambda	42660	28	26	29	34	29	31	25	38	32	25	21	29
Lambda	42720	26	17	19	13	19	12	17	29	20	21	24	12
Lambda	42743	1	1	2	3	1	1	1	3	1	1	0	3
Lambda	42754	10	28	15	19	6	20	6	9	18	5	16	26
Lambda	42773	30	10	23	14	11	15	18	8	27	15	21	10
Lambda	42783	17	16	19	10	8	14	7	18	14	19	7	12
Lambda	42796	4	7	1	7	5	2	5	7	3	7	4	4
Lambda	42866	9	3	4	4	5	5	11	8	3	7	5	7
Lambda	42903	0	0	0	0	0	0	0	0	0	0	0	0
Lambda	42948	14	7	17	21	14	17	17	10	12	20	12	20
Lambda	43037	18	6	7	10	13	12	11	5	14	7	11	11
Lambda	43044	5	2	15	4	2	13	4	7	8	7	4	12
Lambda	43129	22	24	33	27	25	15	26	54	22	46	21	28
Lambda	43147	1	0	2	0	1	1	0	0	1	1	2	1
Lambda	43189	0	0	1	0	0	0	0	0	0	0	0	0
Lambda	43207	10	12	13	13	8	14	2	13	7	9	11	12
Lambda	43227	7	2	9	4	8	9	6	3	7	10	16	8
Lambda	43394	4	2	5	6	5	8	2	8	3	7	6	9
Lambda	43440	0	0	0	0	0	1	0	0	0	1	0	0
Lambda	43490	0	0	1	3	1	1	0	1	2	1	1	1
Lambda	43514	3	2	2	9	3	4	6	6	4	7	5	4
Lambda	43707	1	0	0	0	0	0	0	1	0	0	1	1
Lambda	43757	50	41	52	64	34	41	35	59	35	29	37	45
Lambda	43759	8	29	27	19	10	8	21	33	20	18	10	12
Lambda	43765	0	0	1	3	0	3	0	1	0	1	1	3
Lambda	43832	2	3	4	3	3	3	2	4	4	1	3	5
Lambda	43835	1	1	1	1	0	1	0	1	0	0	0	1
Lambda	43847	0	0	1	0	0	2	0	0	0	0	0	0
Lambda	43883	14	16	7	19	19	4	7	9	5	19	21	10
Lambda	43975	48	38	52	38	31	19	47	41	32	31	37	35
Lambda	44007	1	3	3	6	8	27	4	2	8	25	4	8
Lambda	44020	13	3	12	2	4	9	9	5	14	4	9	13
Lambda	44044	7	8	7	9	13	19	15	8	10	26	11	9
Lambda	44199	4	6	7	14	8	6	11	5	1	29	11	2
Lambda	44218	3	10	7	11	8	19	16	9	13	24	16	12
Lambda	44226	60	53	45	42	44	54	51	28	76	36	61	63
Lambda	44265	12	11	12	21	10	18	20	16	10	10	12	11
Lambda	44317	2	5	3	8	5	6	2	3	0	3	5	4
Lambda	44359	19	5	10	10	24	34	18	8	10	23	26	15
Lambda	44371	64	51	67	75	54	59	66	78	61	95	71	64
Lambda	44430	33	16	33	35	20	14	24	32	14	30	32	25
Lambda	44496	9	2	7	15	4	9	11	9	8	15	11	8
Lambda	44504	5	9	7	9	14	21	2	12	6	9	6	14
Lambda	44632	1	0	1	5	0	3	0	2	1	5	2	2
Lambda	44635	36	6	13	18	29	38	17	5	11	17	21	16
Lambda	44651	5	2	4	3	16	8	2	8	3	14	7	4
Lambda	44671	3	2	4	5	3	6	1	1	3	4	4	1
Lambda	44880	0	0	0	0	0	1	1	0	0	0	0	1
Lambda	44892	37	12	30	40	34	36	35	20	38	52	39	31
Lambda	44923	21	16	14	29	26	24	11	21	16	32	13	26
Lambda	44997	0	0	0	0	0	0	0	0	1	0	0	0
Lambda	45026	0	1	1	1	0	1	0	0	0	0	0	1
Lambda	45043	112	130	93	110	146	149	153	134	144	175	129	104
Lambda	45218	12	2	7	9	6	10	8	6	4	9	6	12
Lambda	45229	29	39	27	42	27	23	43	84	18	57	27	25
Lambda	45284	9	12	10	15	7	8	13	32	12	19	16	12
Lambda	45299	0	0	0	0	0	0	1	0	0	0	0	0
Lambda	45338	20	15	12	19	23	31	17	11	7	28	23	27
Lambda	45380	6	14	4	26	6	6	11	9	11	12	8	9
Lambda	45482	2	6	3	3	7	6	7	1	5	7	6	8
Lambda	45514	11	9	15	12	4	19	13	28	12	23	8	9
Lambda	45565	5	3	6	8	8	11	10	4	4	3	4	9
Lambda	45594	1	1	2	2	2	6	0	1	1	5	1	3
Lambda	45606	2	2	1	2	1	3	3	2	1	3	0	1
Lambda	45681	23	11	13	37	26	34	26	20	18	40	23	14
Lambda	45684	62	53	61	48	32	36	39	25	44	36	37	48
Lambda	45724	12	24	8	25	19	13	14	31	7	17	16	8
Lambda	45801	2	2	1	7	2	1	3	4	2	5	2	1
Lambda	45875	49	42	73	52	21	31	38	28	46	31	47	58
Lambda	45879	52	38	34	54	58	70	37	62	20	69	48	57
Lambda	45938	0	1	1	0	0	0	0	0	0	0	0	0
Lambda	45942	0	0	0	0	0	0	0	1	0	0	0	0
Lambda	45980	10	13	10	11	9	9	12	10	14	13	15	6
Lambda	45992	13	8	7	12	18	4	6	10	4	13	15	7
Lambda	46074	82	128	143	187	94	132	114	133	108	143	150	106
Lambda	46111	0	1	4	2	1	3	1	0	6	1	0	3
Lambda	46153	70	78	76	88	55	63	69	47	76	46	63	83
Lambda	46226	27	31	30	28	32	22	28	36	18	34	30	32
Lambda	46286	26	14	28	27	25	20	23	30	19	24	29	23
Lambda	46292	181	122	128	83	123	105	148	84	182	82	123	124
Lambda	46331	25	7	14	30	22	23	25	11	17	21	12	18
Lambda	46480	0	7	2	6	4	3	0	9	4	4	6	3
Lambda	46489	5	2	4	2	1	8	1	1	3	3	4	6
Lambda	46572	99	60	49	39	79	81	34	28	84	20	54	66
Lambda	46575	14	21	11	47	28	39	30	34	24	52	26	20
Lambda	46669	51	31	45	39	19	16	40	34	19	34	25	40
Lambda	46690	0	0	0	0	0	0	0	0	0	0	0	0
Lambda	46726	4	2	3	13	7	6	2	8	3	10	14	7
Lambda	46892	8	21	11	7	11	2	7	16	6	3	21	12
Lambda	46933	0	1	0	4	2	3	0	4	1	3	2	1
Lambda	46943	28	30	37	24	15	16	34	31	22	28	28	29
Lambda	46977	2	1	1	5	0	4	0	3	1	5	2	1
Lambda	46985	0	0	0	0	0	2	0	0	1	0	1	0
Lambda	47008	0	0	0	1	0	0	0	0	0	0	0	0
Lambda	47029	4	2	1	1	3	1	0	2	0	1	0	2
Lambda	47033	0	0	0	1	1	2	0	0	0	1	1	0
Lambda	47225	0	0	0	0	0	0	0	0	0	0	0	0
Lambda	47359	0	0	0	0	0	0	0	0	0	0	0	0
Lambda	47367	0	0	0	0	0	0	0	0	0	0	0	0
Lambda	47481	21	11	19	13	26	23	30	22	27	26	14	20
Lambda	47604	6	2	2	4	4	1	0	1	3	0	1	2
Lambda	47659	2	2	1	2	1	1	0	0	1	1	1	2
Lambda	47704	2	0	2	3	0	1	0	0	0	1	0	0
Lambda	47722	3	2	3	1	0	3	2	3	1	4	2	1
Lambda	48101	14	9	19	17	5	13	13	18	14	21	9	10
Lambda	48154	4	7	6	13	5	10	9	13	8	10	4	9
Lambda	48201	56	80	43	49	42	41	60	47	65	62	63	36
Lambda	48257	0	0	0	0	0	0	0	0	0	0	0	0
Lambda	48266	0	0	0	0	0	0	0	0	0	0	0	0
Lambda	48281	3	2	1	4	1	4	2	0	3	4	2	2
Lambda	48357	0	0	0	0	0	0	0	0	0	0	0	0
Lambda	48413	0	0	0	0	0	0	0	0	0	1	0	0
Lambda	48436	0	2	2	1	2	2	2	4	3	4	1	1
Lambda	48483	1	0	0	0	0	0	1	0	1	1	0	0
