# Supplementary material for: A Minimal Set of Tissue-Specific Hypomethylated CpGs Constitute Epigenetic Signatures of Developmental Programming
Source: PLoS One. 2013 Sep 12;8(9):e72670. doi: 10.1371/journal.pone.0072670 (PMC3771925; doi:10.1371/journal.pone.0072670)
Supplement: Data Set S4 — List of genes used for Gene Ontology enrichment analysis (XLSX) [file pone.0072670.s005.xlsx]

## Sheet: Sheet1
Genes overlaping TS-DMS (Strong association)					Genes near TS-DMS (weak association)					Genes ranked by #TS-DMS
Kidney	Testis	Liver	Brain		Kidney	Testis	Liver	Brain		Kidney	#	Testis	#	Liver	#	Brain	#
Cuedc1	Zfhx3	Abca1	D11Bwg0517e		Tns1	Xrcc6bp1	AK040674	AK019836		Tns1	10	Zfhx3	20	40795	12	D11Bwg0517e	13
Lama5	Shroom3	Zfpm1	P140		AK018968	Slc35b3	BC145649	AK168184		Tns1	9	Zfhx3	19	AK040674	12	Tiam1	9
Timp3	Zfp775	Trf	Itpk1		AK040143	Tmem26	Id2	AK214641		Itpr1	7	Xrcc6bp1	18	40795	11	AK019836	5
Glis2	Hs6st3	Prkce	Tiam1		AK040224	Ranbp5	AK019824	Mgll		Itpr1	6	Pde4d	17	2810439F02Rik	11	AK168184	5
Macrod1	Pdzrn3	Rxra	Map4k4		5930403L14Rik	Epha7	Rai1	AK015628		Tle3	6	Slc35b3	16	AK040674	11	Grm4	5
Tmc6	Dazl	fad123	Man1c1		mKIAA3026	Spock1	A430090L17Rik	AK027991		AK187371	5	Filip1	16	40795	10	Gse1	5
Tbxas1	Atxn1	Ppara	mKIAA0889		Igf1r	Pde4d	4931406H21Rik	AK039577		Anks1	5	Tmem26	14	2810439F02Rik	10	Itpk1	5
Slc13a3	Atrnl1	2810439F02Rik	Gabbr2		AK171953	Thap1	Amigo2	Tiam1		Arhgap8	5	Shroom3	14	Osgin1	10	Man1c1	5
Palm	Gtf2ird2	St3gal3	Cacng4		BC030050	Mdm1	AK016914	Kcna1		Igf1r	5	D8Ertd82e	14	Rxra	10	Mgll	5
AK187371	Cutl1	Lcat	Sorcs3		mFLJ00298	AK006070	Tsku	Chst12		Itpr1	5	Zfp775	13	Abca1	9	P140	5
Mboat2	Grin2b	40795	Crtc1		DQ566736	Tmem38b	Ppp1r3b	Ttc29		Lama5	5	Trerf1	13	AK040674	9	Ablim2	4
Tbc1d16	Atpbd3	Adk	Kcnh1		Cadm1	Camta1	Osgin1	AB033524		Tle3	5	Shroom3	13	BC145649	9	Adcy1	4
OTTMUSG00000008561	Ror2	Man2a1	Bsn		Tbc1d22a	E330021D16Rik	AK083547	Ncor2		4933407C03Rik	4	Ror2	13	fad123	9	AK039577	4
Vil2	D8Ertd82e	Sh3pxd2a	Plxna1		AK005677	Psmd7	40795	AK005833		Aff1	4	Hs6st3	13	Osgin1	9	AK214641	4
Col4a1	AU022751	Ccbl2	Slit1		AK006070	AK163572	Mycn	AK006706		Anks1	4	E330021D16Rik	13	Prkce	9	Arhgef10l	4
Ptprf	Bcl11b	Scarb1	Bcl11b		AK015628	AK076805	Bcl11b	AK007030		Arhgap8	4	Dazl	13	Rnf144b	9	Arid1b	4
St6galnac3	Fbxl7	Dgat2	Mtap7d1		4933407C03Rik	AK132982	Srd5a1	AK007154		Col4a1	4	D8Ertd82e	13	Slc38a4	9	Bcl11b	4
Map3k7ip1	Scn8a	Etnk2	Nmnat2		AK017048	Ube2e3	Azin1	Sntg2		Cuedc1	4	Camta1	13	Trf	9	Cacna1a	4
Aff1	Pcyox1l	Itih4	C030014K22Rik		Bnc2	2310058O09Rik	Vegfa	Krr1		Glis2	4	Bcl11b	13	Zfpm1	9	Cacng4	4
Llgl2	Lphn2	Tmprss6	Ust		Vti1a	Sall1	Corl2	AK014999		Itpr1	4	Zfp536	12	Adk	8	Centg2	4
Vwa2	Repin1	Klf15	Aatk		Nt5c2	Stt3b	Rnd3	Kcnj6		Lama5	4	Ranbp5	12	Dgat2	8	Coro2b	4
Napsa	4933416C03Rik	Apoc2	Bpag1		AK041762	Zfp365	Ptpn1	Srgap1		Macrod1	4	Pdzrn3	12	Ppara	8	Gabbr2	4
AK016549	Rhobtb1	Nr5a2	Chn2		Minpp1	AK043505	AK018940	AK017891		Pard6b	4	Hs6st3	12	Prkce	8	Kcnh1	4
Ifltd1	Zfp366	Creb3l3	4932417H02Rik		AK042944	Tspan8	Maml3	Rph3al		Pthr1	4	Grin2b	12	Rxra	8	Map4k4	4
Snx8	Mgat3	Sdc1	AK031204		Usp24	Slc16a7	AK133793	9030409G11Rik		Ptprf	4	Epha7	12	Sh3pxd2a	8	mKIAA0889	4
Plekhm2	2810046L04Rik	Elovl2	Foxp1		Letmd1	Mdga2	Mcart1	AK018924		Rgl1	4	Cutl1	12	Slc38a4	8	Myt1l	4
Card9	Lrrc8b	Dap	Pdgfra		mKIAA0640	Diras2	AK020914	AK019388		Rnf144b	4	Atxn1	12	Tsku	8	Nfix	4
Pthr1	Gpr77	Mtss1	AK035625		AK054515	Tiam1	Insig1	Arhgef10l		Shb	4	AK139687	12	2810439F02Rik	7	Rph3al	4
Slc34a1	Filip1	Smcr7l	Peli2		Card11	Supt3h	Afm	Esr1		Slc13a3	4	Thap1	11	Adipor2	7	Sorcs3	4
Cldn10	Kcnv2	Slc38a4	Fam102b		Spsb4	4930473A06Rik	AK162140	AK040671		Spsb4	4	Spock1	11	Adk	7	Tcf4	4
1810044A24Rik	Sohlh2	Itgb5	H13		mKIAA0387	LOC666927	Mad1	AK041075		St6galnac3	4	Scn8a	11	BC145649	7	Wwox	4
Rab11fip3	Spred2	Gfra1	mKIAA0515		AK084554	Suds3	Tgfa	5930403L14Rik		Timp3	4	Rhobtb1	11	Dgat2	7	A2bp1	3
4933407C03Rik	Kif6	2900026A02Rik	Cacna1a		wdr4	AK162140	Rybp	AK042647		Tle3	4	Rbms3	11	Dock6	7	ADAM22	3
Opcml	Mapk4	Adipor2	Jmjd2a		AK086911	zfp507	AK006738	Hnt		1810073N04Rik	3	Mfhas1	11	Ece1	7	AK015628	3
Pdzk1	6430526N21Rik	Fto	Zmiz1		AK087264	Slc10a2	Dynlrb2	mKIAA1272		5930403L14Rik	3	Lphn2	11	fad123	7	AK027991	3
Ssx2ip	Phkb	Zfhx3	Adam22		AK135691	Terf2ip	1700018B08Rik	AK043332		Aff1	3	Gtf2ird2	11	Nr5a2	7	AK082731	3
Itpr1	BC060632	Dock6	Asxl3		AK140161	Rbms3	Pvrl1	AK048050		AK017048	3	Grin2b	11	Ppara	7	AK083777	3
mKIAA0665	Pml	Lipc	AK082731		Ctdspl	BC084590	AK019125	Arhgef10		AK018968	3	Dyrk2	11	Pvrl1	7	Ank3	3
Paqr5	BC099544	AI132487	Fry		Ttc32	Eya4	Agxt	Myt1l		AK040143	3	Dazl	11	Rnf144b	7	Baiap2	3
Mthfd1l	Cdkn1a	Hpn	5330421F07Rik		Tle3	Hace1	Gli2	AK082148		AK040224	3	Cutl1	11	St3gal3	7	Bpag1	3
Anks1	Actl7b	Clint1	Stk39		AK160416	Dnajc12	Pigm	Dlgap2		AK171953	3	Atxn1	11	Tmprss6	7	Bsn	3
Bicc1	Pbp2	AK031204	Syt11		AK187371	Wif1	Arg1	AK083777		AK187371	3	Atrnl1	11	40795	6	Btbd9	3
Mapkap1	Lrp3	Tmem104	AK138592		AK214683	Rps23	Cdh23	Pxn		Ankrd15	3	Atpbd3	11	2900026A02Rik	6	C030014K22Rik	3
0610012H03Rik	Col19a1	Ppp2r5c	Dab2ip		mKIAA1626	Itga1	AK164976	Sez6l		Ankrd46	3	Adamts20	11	Adk	6	Cacna2d2	3
Pla2g6	Grem2	Rnf144b	Rasgef1a		Rnf144b	Pcdh17	AK006461	Card11		Apbb2	3	Tmem38b	10	Agxt	6	Camk2b	3
Plekha7	AK039734	Tmem110	Mbnl2		Mrps22	4921530L21Rik	Phlda1	Cdh26		Arhgap8	3	Stt3b	10	AI661453	6	Cdh13	3
Chdh	Polrmt	Fkbp5	D230014K01Rik		Srbd1	Cdh18	Grip1	AK139687		Arid1b	3	Ror2	10	AK016914	6	Cdh4	3
Adamts2	Msrb3	Pank1	Ttll11		Med13l	ORF63	AI851790	Casz1		BC030050	3	Psmd7	10	AK019824	6	Chd7	3
Arhgap10	BC048403	Pde6c	Arhgap10		BC039210	Bach1	Lrp1	mKIAA0903		Cadm1	3	Mrps28	10	BC033915	6	Chst12	3
Slc25a30	Pik3cg	Abcc2	Scn8a		Rab3gap2	Lyzl1	DQ551402	BC020326		Cldn10	3	Mdm1	10	Car5a	6	Crtc1	3
Prkcbp1	Ston2	5730472N09Rik	Myo7a		Sall1	AK163160	AK141527	BC038474		Col4a1	3	Filip1	10	Ccbl2	6	D230014K01Rik	3
Polr3e	Hivep1	Cat	Map2k2		Lrrc62	A730085E03Rik	Sstr2	zfp507		Ctdspl	3	Emid2	10	Dap	6	Dip2b	3
Zfp536	Jarid2	Bcar3	Rad52		D630023B12Rik	AK014992	C130039O16Rik	Ush2a		DQ566736	3	D8Ertd82e	10	Dgat2	6	Dlgap2	3
Tmem39b	F2r	Dab1	D11Bwg0517e		Prickle1	Map3k7	BC048601	Sox6		Drctnnb1a	3	Bcat1	10	Ece1	6	Eif4g3	3
Shb	Casr	Dhcr24	Sdk1		Tmem2	AK135377	Rnf144b	Hk3		Fanca	3	Bach1	10	Elovl2	6	Foxp1	3
Arid1b	Cldn14	Fbxo21	Grm4		Thnsl2	Anapc4	Irx4	Lrrc30		Fgf1	3	AK132982	10	Etnk2	6	Fyn	3
BC054075	Arid1b	Aacs	Ptprm		Tmpo	Pik3c2g	F2rl1	Cacna1i		Flnb	3	AK122525	10	Foxn3	6	Hnt	3
Pde9a	Zfp13	Magi1	Ablim2		Irs2	Plekha5	AK146386	4933401F05Rik		Gse1	3	AK006070	10	Hpd	6	Kcna1	3
Apbb2	Trerf1	Cidec	Nuak1		Gpr133	AK139687	AK050283	1810013L24Rik		Hs6st1	3	2310058O09Rik	10	Id2	6	Kcnc1	3
Ccdc69	Tshz2	2310007H09Rik	Grm4		Bach2	Bcat1	Ankrd55	Foxl1		Itpr1	3	Zfp608	9	Itih4	6	Kcnj6	3
Erbb2	Mrps28	Ebf3	Tpd52		Emx2	9430010O03Rik	Spert	Mycn		Lhfpl2	3	zfp507	9	Klf15	6	Mtap7d1	3
Rab3ip	Smad9	Osgin1	Baiap2		Nt5e	Zmat4	Npr3	Emx2		Llgl2	3	Zfp365	9	Lcat	6	Mycn	3
Wdr91	D3Bwg0562e	Ldlr	Trio		Apip	Dynlrb2	Klf10	Meox1		Map3k7ip1	3	Veph1	9	Man2a1	6	Myo16	3
Dennd3	Pigo	Hnt	Myo16		Pvrl1	AK003327	AK145218	Nfatc2		Mboat2	3	Ube2e3	9	Mtss1	6	Myo7a	3
Arhgef17	AK030448	Zbtb16	Rnf144a		Cxcl12	Nr5a2	AK004252	Ptpru		Med13l	3	Tshz2	9	Ppp1r3b	6	Nfatc2	3
Tle3	BC013481	Rora	Nfix		Dusp26	Hlx	Lpp	Rps6ka2		mFLJ00298	3	Trpc7	9	Ppp2r5c	6	Nmnat2	3
Fzd4	Cabp1	Itga9	Arid1b		Cdt1	Scml4	Atp6v1a	Ccl1		mKIAA0665	3	Tmem28	9	Rai1	6	Otof	3
Lama1	Ryr1	AK085287	OTTMUSG00000008561		Pllp	DQ727054	AK089217	Cntn6		mKIAA3026	3	Sdk1	9	Scarb1	6	Park2	3
Map3k5	Zfp619	Agxt	Myt1l		Agpat5	AK144843	2810439F02Rik	Sgsh		Opcml	3	Scn8a	9	Sh3pxd2a	6	Peli2	3
Slc22a18	Zfp629	Psen2	Smyd4		Ccdc12	Dyrk2	Synpo	Wwox		OTTMUSG00000008561	3	Sall1	9	Srd5a1	6	Pknox2	3
Pax5	Nr3c2	Ftcd	Apba2		Grip1	AK082096	Hectd2	Anapc7		Palm	3	Repin1	9	2900026A02Rik	5	Plxna1	3
Slc6a6	Gfod2	Sbno2	Speg		Ier5l	Lrig3	Aldh18a1	Mds1		Pard6b	3	Prickle1	9	4931406H21Rik	5	Pxn	3
Angpt4	Prss35	AK087886	Cacng2		Tas1r2	Vrk1	AK006839	Ctdp1		Pde9a	3	Plxnb2	9	A430090L17Rik	5	Rbms3	3
Cacna2d3	AK019722	Gcgr	Fyn		Kctd1	Kif13a	Tshz2	Tbc1d22a		Pdzk1	3	Pik3c2g	9	Abcc2	5	Rnf144a	3
Igf1r	Dsp	Gulo	Kcnc1		Sumf1	Rnf144b	AK040671	Smox		Plekha7	3	Phkb	9	Acsl1	5	Scn8a	3
Kif12	Osbpl7	Slc38a4	Adcy1		Ankrd46	Gpr98	Zfp462	Dip2b		Prkcbp1	3	Pcyox1l	9	Adipor2	5	Sdk1	3
Snf1lk	Hdgfl1	Ttr	Cbfa2t3h		EG328231	Cetn3	Foxd2	Slc6a11		Pthr1	3	ORF63	9	AI132487	5	Sdk2	3
Hs6st1	Rnasen	Slc41a3	Cdh4		Gse1	AK043659	Ece1	Stox2		Ptprf	3	Odz3	9	AK016914	5	Sez6l	3
Nup50	Prdx6-rs1	Car5a	Pthr1		Kcnk12	Cysltr2	Ajap1	Nkx6-2		Rab3gap2	3	Mdga1	9	AK031204	5	Slc6a11	3
Rgl1	Phf17	Rtp3	Ski		Shank2	AK007305	AK041797	Igsf21		Rgl1	3	Mast4	9	AK040671	5	Slit1	3
Wwox	Hip1	Gsta3	Sergef		Odz4	AK007006	Shroom3	Gse1		Secisbp2	3	Map2k6	9	AK085287	5	Srgap3	3
Pard6b	Figla	Lrrfip1	Tspan5		Hsd17b6	Dnahc5	AK133032	TIPR		Shb	3	Lphn2	9	Amigo2	5	Stox2	3
Chst11	Tuba3a	Creg1	Stard3		Prok2	mKIAA1382	Hpd	Dscaml1		Slc13a3	3	Kif13a	9	Apoa5	5	Tbc1d22a	3
1810073N04Rik	Nck2	Aldh9a1	Agpat4		Lima1	Robo1	Pitpnm2	Shank2		Slc6a6	3	Jarid2	9	Apoc2	5	Tle3	3
Btd	Epm2a	Smyd3	Ociad2		Sfxn5	Trerf1	Gtf2i	Galntl4		Snf1lk	3	Itga1	9	BC033915	5	Trio	3
Aldh1l1	AK122525	Susd4	Brf1		Centd3	LOC171266	Snx10	Corl2		Snx8	3	Fbxl7	9	C79267	5	Tspan5	3
Smurf1	Ggtla1	Map3k5	1700106N22Rik		AK002929	Gramd3	Sftpb	Sox10		St6galnac3	3	F2r	9	Cadm1	5	Ttc29	3
Setbp1	Usp44	Dazap1	Ccdc3		AK005576	AK033454	Cebpa	Scn8a		Tbc1d16	3	Emid2	9	Car5a	5	Ust	3
Fbxo31	Dyrk2	Gng7	Rasgef1c		AK005635	Mex3c	Abhd2	Camk2b		Tbc1d22a	3	Dlgap1	9	Cebpa	5	Vps37b	3
Taf5l	AK019630	Sec14l2	Rph3al		Zc3h15	Zfp407	AK034027	Sorcs1		Tbxas1	3	Diras2	9	Col18a1	5	Wscd2	3
Flnb	Stk10	Ntn1	Nptxr		AK005828	AK090268	Ifitm1	Slc4a4		Thnsl2	3	Ctnna3	9	Creb3l3	5	1110012J17Rik	2
Spsb4	Slc47a2	Myo1c	Otof		AK006037	Lnp	Csmd1	Ptprt		Tmc6	3	Bcl11b	9	Dap	5	1700018L24Rik	2
Dap	Gucy2e	Trim25	Zfp423		AK006189	AK037623	Acsl1	Prok2		Tmem16f	3	AU022751	9	Dock6	5	1700041B01Rik	2
Arhgap8	Map2k6	Acly	Kcnn3		1700021F07Rik	Macrod2	Hp	Aldh1a3		Tmem2	3	AK219219	9	Elovl2	5	1700106N22Rik	2
Mboat1	Slc25a21	Tbc1d16	Adrbk1		AK006331	AK012506	Maf	Park2		Vil2	3	AK163572	9	Etnk2	5	1810013L24Rik	2
Cnksr3	AK046740	Rreb1	Trpm8		1700001K19Rik	AK163681	AK039624	Dnahc8		Vti1a	3	AK076805	9	Foxn3	5	2310016F22Rik	2
Cdh22	B3galnt2	Txndc5	Lims2		AK006725	Impad1	Gse1	Centd3		Vwa2	3	Zmat4	8	Fto	5	4631405J19Rik	2
Tmem16f	Trpc7	BC010304	Zdhhc14		AK006738	Slc45a1	Prdm10	mKIAA1902		Wwox	3	Zfp366	8	Gfra1	5	4631426J05Rik	2
Aldh4a1	Mast4	Spock1	Pknox2		AK006961	Errfi1	Cadm1	Ofcc1		0610012H03Rik	2	Wif1	8	Itgb5	5	4932417H02Rik	2
Anks1	Pde4d	Arhgap22	Arhgef10l		AK006991	Gm833	Rplp1	1810013D10Rik		1810013D10Rik	2	Tspan8	8	Itih4	5	4933401F05Rik	2
Plekhm1	Rhobtb2	Tnfrsf19	Sdk2		AK007030	AK039574	Ptp4a1	Ccdc128		1810044A24Rik	2	Tiam1	8	Klf15	5	4933407C03Rik	2
Tanc1	Zfp647	Lifr	Ppp2r2c		AK007112	Zfp326	AK003327	AK005363		1810073N04Rik	2	Terf2ip	8	Lipc	5	5330421F07Rik	2
Prmt8	Cbx7	Blk	Trak1		msi2	1500001A10Rik	Igfbp2	Tbc1d5		2310045A20Rik	2	Supt3h	8	Lpp	5	5930403L14Rik	2
Plac8l1	Cacna1i	Celsr1	Coro2b		AK007214	BC100494	AK141842	AK005643		2600001A11Rik	2	Suds3	8	Lrp5	5	8430427H17Rik	2
Bcl2l12	Plxnb2	Arid2	Lsamp		1700125F08Rik	Tmem132b	2810459M11Rik	AK005653		4933407C03Rik	2	Ston2	8	Mad1	5	9030409G11Rik	2
Sufu	Slc2a13	Abat	Mical2		AK007845	AK006725	AK039419	1700008G05Rik		4933437K13Rik	2	Spred2	8	Magi1	5	Aatk	2
AK205829	Prickle1	Cpn2	Zfp653		AK007854	AK076755	Nfasc	AK006131		5730559C18Rik	2	Slc16a7	8	Mgmt	5	AB033524	2
Acadl	Bin1	Pdia5	Vash1		Nudt7	Card11	AK051055	AK006189		9030409G11Rik	2	Slc10a2	8	Mtss1	5	Ablim1	2
Fanca	Tubb6	Runx1	Ccdc60		AK008856	Zfp536	Nr5a2	1700021F07Rik		A230106M15Rik	2	Rhobtb1	8	Nr5a2	5	Acsl6	2
Col8a2	mKIAA0889	Setd4	Vps37b		AK008969	Tmem28	Cdc73	AK006465		Acadl	2	Rerg	8	Osgin1	5	Adarb1	2
Ccr6	Zmat3	Pex6	Trim62		AK009335	Erlin2	Atp1b1	AK006587		Acin1	2	Prkce	8	Ppp1r3b	5	Adrbk1	2
Pcnt	Veph1	AI661453	Tbce		AK009368	Mfhas1	Cnih3	AK006677		Adamts2	2	Mgat3	8	Ptpn1	5	Aff3	2
Gpr56	Fstl5	Foxp4	Rftn1		AK009788	Fgf20	Lyplal1	smoc2		Agpat5	2	Mdga2	8	Rai1	5	Agpat4	2
Arvcf	Dnase2b	Tnfaip8l1	Lrrc62		Gp2	Zfp353	Esrrg	AK006991		Ahdc1	2	Map2k6	8	Rreb1	5	AK005833	2
Ezh1	Ttc22	Myo5b	Tcf4		Acot7	Ing2	Ints7	msi2		AK005677	2	Lrrc8b	8	Sdc1	5	AK006706	2
AK005643	4732473B16Rik	Cyb5	Serhl		AK011682	AK006709	Ifngr1	Alkbh3		AK006070	2	LOC666927	8	Slc38a4	5	AK007030	2
OSCP1	AK044414	Lrp5	Lysmd4		Angptl2	Filip1	AK006189	AK007216		AK015628	2	Lgr5	8	Smcr7l	5	AK007154	2
1810013D10Rik	Pkd2	Rcl1	Kpc1		5830445C04Rik	Plekhb2	Tube1	AK007305		AK016549	2	Gpr77	8	Snx10	5	AK014999	2
Tinag	Emid2	5730455O13Rik	Tsc2		Lmo2	Tmem182	AK039734	1810046K07Rik		AK019585	2	Fstl5	8	Spock1	5	AK015404	2
2310061J03Rik	Tmem184a	Vti1a	Wscd2		AK013712	Wdr75	Psap	AK007854		AK035687	2	Flt1	8	Suclg2	5	AK017891	2
Col9a1	Zfp282	Pnpla7	Rnf207		Loxl4	C230029F24Rik	AK044689	AK008586		AK037512	2	Filip1	8	Tgfa	5	AK018924	2
Pdzk1ip1	Zfp324	Cd302	MMET-1		AK014460	Pard3b	Tmcc3	AK009351		AK041762	2	Ctnna3	8	Tmprss6	5	AK019388	2
Lypd1	Npas1	B4galt5	40790		Bnip2	Pthr2	Plxnc1	AK009368		AK042944	2	Cdh18	8	Tsku	5	AK031204	2
AK013564	Ltbp4	Rapgef2	Cadm1		AK014683	Slc4a3	Eea1	Spata5		AK046742	2	BC084590	8	Vegfa	5	AK035625	2
5730559C18Rik	Fbxo17	Ddx58	Asb2		AK014969	Kcnt2	AK089123	Angptl2		AK054515	2	B3galtl	8	Zfhx3	5	AK040671	2
AK019332	Tshz3	Hmgcl	Atp6v1c2		AK015105	AK122525	AK135691	Tmem33		AK084554	2	Arhgap24	8	Zfp462	5	AK041075	2
AK019731	Zfp668	Ece1	AK004221		Cxxc5	Qrsl1	Emid1	Tmem161b		AK085459	2	AK163681	8	Zubr1	5	AK042647	2
AK028711	Stox2	C79267	AK005580		Slc16a9	Prep	Xbp1	AK014147		AK086911	2	AK162140	8	1300018I17Rik	4	AK043332	2
AK029663	Tbc1d9	Pgd	AK008222		AK015203	Tex18	Tns3	Aff3		AK087264	2	AK082096	8	1700018B08Rik	4	AK043964	2
Pdzk1	Zfp791	Antxr2	kiaa1322		AK015208	Tmpo	Spred-2	AK014513		AK132084	2	AK043505	8	2310007H09Rik	4	AK048050	2
Rab3gap2	Wwox	Cmklr1	Anx3		AK015227	Phlda1	Xpo1	AK014786		AK135691	2	AK019598	8	4632417N05Rik	4	AK082148	2
Lsp1	Plcg2	Slc24a6	Dnase1l2		Zcwpw2	Trhde	Papolg	AK015092		AK140161	2	AK006725	8	5730472N09Rik	4	AK138592	2
AK031871	Dclk3	Hpd	Ckap5		AK015392	Cpm	Fstl4	Spsb1		AK144886	2	4933416C03Rik	8	Aacs	4	AK139687	2
AI851790	AK039809	Tctn2	AK015404		AK015444	Rap1b	Asgr2	AK015395		AK160416	2	4930473A06Rik	8	Abat	4	AK140147	2
Rxfp2	AK010195	Crcp	AK016549		AK015475	AK005678	Ksr1	AK015404		AK205829	2	2810046L04Rik	8	Abcc2	4	AK140632	2
AK035687	Myo10	Foxk1	mKIAA0351		Csmd3	AK076916	Ccl9	AK015475		AK214683	2	Zfp217	7	Afm	4	Akt1	2
AK035761	Adamts20	Usp12	AK021075		Scd3	Srgap1	Aatf	Armc4		Aldh1l1	2	Wwox	7	Agpat3	4	Anapc7	2
Nup210	4933415F23Rik	St3gal5	AK028782		AK015826	C1d	AK018946	Rab11fip2		Aldh4a1	2	Wdr20b	7	AI132487	4	Anks1b	2
A230106M15Rik	BC050210	Atoh8	Pik3r5		AK015937	Spred-2	BC096410	AK015566		Angpt4	2	Tshz3	7	AI851790	4	Apba2	2
AK041328	Myog	Suclg2	Col16a1		AK016284	Stac2	3300001P08Rik	AK015682		Ankrd15	2	Trpm4	7	AK006738	4	Arhgap10	2
Ptpru	Ankrd36	Mgst1	Rims2		AK016332	Ferd3l	Chad	AK015818		Anks1	2	Trerf1	7	AK018940	4	Arhgef10	2
Lrp4	4933402P03Rik	Dpy19l3	AK033649		AK016386	Etv1	G6pc	AK015900		Apbb2	2	Spred2	7	AK020914	4	Arrb1	2
AK052590	Hsf5	Mctp2	Lsm14b		AK016496	Frmd6	Nags	Plb1		Apip	2	Spred-2	7	AK031204	4	Asxl3	2
AK052792	Wdr20b	Tsku	Nup210		Nmnat3	Ppm1a	Cacng5	AK016100		Aqp1	2	Sohlh2	7	AK083547	4	Atp13a2	2
Tmco4	Comtd1	Spcs2	AK036614		4933417O08Rik	Sipa1l1	AK053334	AK016251		Arhgap10	2	Sin3b	7	AK085287	4	Atp1a3	2
AK077350	Rbp3	Mgmt	mKIAA1635		AK016914	AK015208	Cbx4	AK016383		Arhgap8	2	SASH1	7	AK133793	4	Atp2b2	2
AK077811	AK076947	Rbpms	Anks1b		Zranb3	AK132076	Nptx1	Grip1		Arhgef10	2	Ryr1	7	AK162140	4	AU040829	2
AK078931	AK018584	Palld	Ppp1r12b		AK017006	Zcchc6	Ddx1	Hsf2bp		Arhgef17	2	Rps23	7	AK169507	4	Auh	2
Gpr87	Plxnb2	Klhl2	AK039498		mKIAA3017	EG328264	AK138505	4933407C03Rik		Arid1b	2	Robo1	7	Alb	4	Bach2	2
Cyb5b	1110012J17Rik	Herpud1	Taok3		AK018156	Hmgcr	Daam1	Nmnat3		Arvcf	2	Pml	7	Angptl6	4	BC020326	2
AK085300	Zfp608	mKIAA0703	Qscn6l1		Cgnl1	AK136034	Max	Mfap3l		Atpbd4	2	Plekha5	7	Apoa5	4	BC038474	2
AK085652	1700011F14Rik	Usp10	Mtap2		Hnf1b	Gpbp1	Fut8	Rtdr1		Atrnl1	2	Phkb	7	Asgr2	4	Bdh1	2
Ctage5	Tanc1	Pard3	AK043780		AK019585	DQ557218	4933426M11Rik	Osbpl10		Atxn7l4	2	Phf17	7	Azin1	4	Brf1	2
Phldb1	Cybrd1	Pvrl1	AK044901		AK019657	1700129C05Rik	AK158157	Cacna1a		Bach2	2	Pdzrn4	7	BC013481	4	Brsk2	2
Gramd1b	Spo11	BC033915	1110012J17Rik		AK019672	Dleu7	Flrt2	5430419D17Rik		Baiap2l2	2	Pcdh17	7	BC048601	4	Brunol4	2
Kirrel3	Adad1	Apoa5	AK053602		AK019711	myo 10	Zc3h14	Grg4		BC017158	2	Ofcc1	7	Bcar3	4	Cacna1c	2
mKIAA1549	1700018B24Rik	Acat1	Efemp2		Mccc2	Grhl2	Foxn3	mKIAA0148		BC021611	2	Ntrk2	7	Bcl11b	4	Cacna1i	2
Dgkh	Ssr3	Tln2	AK076655		Bmp7	Adamts20	AK053772	AK018156		BC039210	2	Nrip1	7	Bcl6	4	Cacng2	2
AK135894	Sycp1	Myo1e	AK076673		AK020588	Slc38a4	AK015628	1700041B01Rik		BC054075	2	Nfatc2	7	cAMP-GEFII	4	Camta1	2
Cd27	Rngtt	Ephb1	AK076979		Itgav	Amigo2	Yy1	AK018911		BC057022	2	Neto1	7	Cat	4	Card11	2
AK143758	1700013N18Rik	Ky	Csnk1g2		AK020768	Btg3	Ppp2r5c	AK018940		Bcl2l12	2	Msrb3	7	Ccnd1	4	Casz1	2
Cd160	Fkbp6	Igfbp1	Ablim1		AK020795	AK019711	AK080484	AK019125		Bicc1	2	Mast4	7	Cdh23	4	Cbfa2t3h	2
KIAA1447	Stk31	Tnrc5	AK079929		AK021093	Hunk	AK054515	Cox4i1		Bnc2	2	Mapk4	7	Cds1	4	Cblb	2
Med25	Tuba3b	AI661453	alpha1B		AK021368	Setd4	Foxq1	Ptprb		Btd	2	Map3k7	7	Cebpa	4	Ccdc3	2
Clcn7	Odz4	S3-12	AK083777		AK028077	Mdga1	Nrn1	AK019563		Cabc1	2	Macrod2	7	Cidec	4	Ccdc60	2
Zc3h12a	Olfr370	Gcnt7	E130303B06Rik		Tmcc1	Zfand3	Rreb1	AK019672		Cacna2d2	2	Lyzl1	7	Clint1	4	Ccl1	2
Ptpre	Plcl1	Angptl6	AK087691		Srrm1	S94460	Eef1e1	AK019723		Cacna2d3	2	Lrp3	7	Col18a1	4	Cdgap	2
AK158974	Igsf9	Ugt1a5	Csrp2bp		Arhgef10l	AK195428	Mylip	AK019731		Camta1	2	Lrig3	7	Corl2	4	Cdh26	2
Mettl1	Txlnb	Serpinc1	AK088937		Lpp	Ptprm	AK044426	4930544G21Rik		Card11	2	LOC171266	7	Cpn2	4	Chn2	2
Fgd3	mKIAA1028	Nr1i3	Slc9a8		AK029587	AK144664	Ninj1	AK019818		Card9	2	Lnp	7	Crcp	4	Clnk	2
AK165443	Pcdh15	Zbtb24	Rps6ka1		mKIAA1371	Fbxo11	AK020502	AK020043		Ccdc12	2	Kif6	7	Creg1	4	Cntn6	2
AK165817	Col6a2	Col18a1	AK134749		Nek11	Ss18	Spock1	AK020496		Ccdc69	2	Kcnv2	7	Dab1	4	Col16a1	2
Renbp	Syde1	Lrrc3	Lfg		LDLB	Zfp608	Cartpt	AK020588		Ccnl1	2	Hivep1	7	Dhcr24	4	Cradd	2
Vangl1	Hmha1	Agpat3	AK140147		AK031770	Gm96	Pik3r1	AK020680		Cdh22	2	Hace1	7	Dynlrb2	4	Crhr1	2
apo	Zbtb7a	Nfic	Unc5c		AK032118	AK015395	AK134426	AK020767		Cdh26	2	Grhl2	7	Ebf3	4	Ctbp2	2
Tcn2	BC067068	BC025885	Smarcc2		Runx1t1	Neto1	Snag1	A930008G19Rik		Cdt1	2	Gramd3	7	Fbxo21	4	Ctdp1	2
9030409G11Rik	Lgr5	1700020C11Rik	AI317237		Myo5b	Grg4	Fst	AK028130		Centg2	2	Gnas	7	Fkbp5	4	Dab2ip	2
Atp6v0a2	Thoc5	Pemt	Dot1l		Atpbd4	Pten	AK088911	AK029404		Centg3	2	Gats	7	Foxn3	4	Dlgap3	2
Trpm1	Zfp672	Asgr1	Nfix		Rora	AK006114	AK015475	AK029503		Cgnl1	2	Fbxo17	7	Fstl4	4	Dnalc4	2
AK202794	Trim58	Vtn	H1foo		Fat4	AK045825	AK016284	Dnalc4		Chat	2	F2r	7	Gli2	4	Dock9	2
Arvcf	Tnfrsf13b	Eif1	Crtam		Enpep	Tas2r134	Ankrd28	AK029692		Chdh	2	Eya4	7	Gse1	4	Dscaml1	2
AK206655	Wnt9b	Serpina1a	Pfn2		Rhobtb1	Ctnnd1	Ubb	8430427H17Rik		Chst11	2	Exoc4	7	Hnf4a	4	Dusp5	2
Cpsf3	Slc39a11	Slc17a3	Sema6b		AK035466	Syt13	Bmp4	AK029958		Clcn6	2	Epb4.1l3	7	Hnt	4	Egflam	2
Lcmt1	Rhoj	Sirt5	D230014K01Rik		AK035687	Plcb4	mKIAA0008	Stox2		Cldn10	2	Edg2	7	Hp	4	Elmo1	2
AK219638	9030205A07Rik	Nfil3	Slc2a6		Jph4	4930517K23Rik	Gata4	Rad18		Clstn2	2	Dynlrb2	7	Hpn	4	Emx2	2
Gli2	Bdkrb2	Stab1	Plch1		Phc1	Sfrs6	Gfra2	Sdk1		Cnksr3	2	DQ727054	7	Hrg	4	Ephb2	2
Pou6f1	Eml1	AK149453	Pisd		AK036396	Ywhab	Rcbtb2	Dlgap1		Col8a2	2	Dok5	7	Insig1	4	Ercc4	2
Tmem8	AK034282	Nr1i2	Btbd14b		Zbtb40	D3Ertd300e	Sucla2	Antxr1		Crocc	2	Dnajc12	7	Irf2bp1	4	Esr1	2
Tmem80	Dapk1	Prkcn	AK192827		Ikzf3	Frrs1	Gpc6	Galnt9		Cspg4	2	Dnahc5	7	Itga9	4	Evc2	2
mKIAA3005	6430502M16Rik	1200004M23Rik	Napor-1		Tnpo1	AK040960	AK039417	Hrh1		Ctnnd2	2	D3Bwg0562e	7	Ldlr	4	Exoc4	2
Arhgap8	Il3ra	Gpr44	Shf		AK037056	Pitx2	Sepp1	AK033000		Cutl1	2	Cybrd1	7	Lipg	4	Fam102b	2
Centg3	AK153491	Rxra	mKIAA4191		AK037512	Rap1gds1	BC038155	Rbms3		Cxcl12	2	Col19a1	7	Lpp	4	Fnbp1	2
BC039791	Cdh24	Hnf4a	Cspg4		6430704M03Rik	Car8	Cyp2d9	Gse1		Cyb5b	2	BC060632	7	Lrp1	4	Foxl1	2
Hmgx2	Nfatc4	Sys1	MysPDZ		Mdga2	Chd7	AK006138	Ell2		D630023B12Rik	2	BC048403	7	Lrp5	4	Fry	2
BC079904	Xkr6	Cebpb	Myo7a		AK039608	AK016071	5730409G15Rik	AK034027		Dap	2	Auts2	7	Mad1	4	Gli2	2
BC096410	Pcdh9	AK040674	Ak1		AK039635	Melk	A2bp1	Grm2		Dennd3	2	Arhgap15	7	Magi1	4	Gpr107	2
C130050O18Rik	Tbc1d4	Mpdz	CtBP2		AK039829	Rad23b	1810013L24Rik	Trim9		Dock9	2	Ankrd36	7	Maml3	4	Grin2a	2
Rere	AK051495	Elovl1	BC030045		mKIAA0439	Edg2	AK131759	Kctd15		Drctnnb1a	2	Anapc4	7	Mcart1	4	Gtl2	2
2600001A11Rik	Wnt7b	Nr0b2	BC038167		Pdzd6	1810054D07Rik	Bcl6	Nfib		Dusp26	2	AK219219	7	mKIAA0545	4	H13	2
mKIAA4191	AK084200	Prhoxnb	Mtap4		AK040640	AK076709	Gm1968	Cdh13		EG328231	2	AK186650	7	Mpdz	4	Haghl	2
DQ556351	Apod	B230342M21Rik	Fcgbp		AK040674	Lphn3	Kalrn	AK035379		Eml4	2	AK163160	7	Mycn	4	Heg1	2
Adamts13	Lrrc33	AK039589	D19Bwg1357e		Trak1	Znf326	AK086534	Hadha		Emx2	2	AK144843	7	Myo5b	4	Hhat	2
Fbxl10	AK087806	0610030E20Rik	Agrn		AK041628	Pptc7	Pvrl3	4631426J05Rik		Erbb2	2	AK135377	7	Nr1i2	4	Hk3	2
Gm1587	Igsf5	Uroc1	Mll2		mKIAA0545	AK017106	AK052569	Cdcp1		Fanca	2	AK084200	7	Palld	4	Htr1d	2
Thnsl2	4930511I11Rik	Irf2bp1	Dzip1		Hnt	Auts2	Ckt2	AK036396		Fbln2	2	AK079194	7	Pank1	4	Hunk	2
LOC634428	Cdkl4	Abcc6	Vsig8		Frmd4a	Gats	C21orf63	Ikzf3		Fbxo31	2	AK049838	7	Pde6c	4	Ict1	2
Lama5	Prkce	Tm6sf1	Stat2		AK043460	Sdk1	Dscr3	mKIAA0134		Fgf1	2	AK030448	7	Pitpnm2	4	Igsf21	2
Tox2	Rps6ka4	Thrsp	BC065127		AK043531	Ubl3	Tcte3	Krt80		Flnb	2	AK019838	7	Pkd1l2	4	Inadl	2
Aqp1	Dnmbp	F7	Aytl2		AK043844	B3galtl	mKIAA1181	Tmprss11f		Fndc1	2	AK019722	7	Ppp2r5c	4	Iqce	2
Bid	D19Ertd652e	F10	Gpsm1		Tnrc6a	Stard13	Pim1	Tnrc6c		Foxk1	2	AK014992	7	Prkcn	4	Jmjd2a	2
Ccng2	Cubn	Tat	Ict1		mKIAA0338	Hibadh	Mrpl14	AK038767		Fstl4	2	AK006114	7	Psen2	4	Kalrn	2
Dpagt1	Cacnb2	Pcnxl2	Pdzd7		Kiaa0575	Aebp2	AK088204	C130026L21Rik		Fto	2	Adamtsl1	7	Ptpn1	4	Kcnn3	2
Elf3	AK048710	Dock6	Rere		Ctr9	2810474O19Rik	Lbh	Muted		Fzd4	2	A730085E03Rik	7	Pvrl1	4	kiaa1322	2
Gba	B230120H23Rik	Apoa1	Parc		meis2a	Aldh1a3	Prepl	AK039053		Gpr133	2	9430010O03Rik	7	Rassf8	4	Kif26b	2
Cd79b	Nfatc2	Dixdc1	R3hdm2		AK045700	AK143760	Srbd1	mKIAA1422		Gpr56	2	6430526N21Rik	7	Rbpms	4	Klf7	2
Klk1b5	Spg20	Hyal1	St18		Jph3	AK052414	Epas1	AK039269		Grip1	2	4921530L21Rik	7	Rnd3	4	Kpc1	2
Prkaca	Tmem56	Slc38a3	E030019B06Rik		mKIAA0429	Triml1	Lyzl1	AK039362		Gsn	2	1500001A10Rik	7	Rnf144b	4	Krr1	2
Plau	Ank2	Mst1	BC141885		AK046742	Foxl1	Mpp7	Acsl6		Hlcs	2	Zfp647	6	Rora	4	Ldhb	2
Sema3b	Mobkl2b	Cyp8b1	DQ284430		Ptpn13	Arih1	AK033147	AK039419		Hnt	2	Zfp629	6	Rybp	4	Lhfp	2
Slc22a12	2310009E04Rik	Tram2	DQ561039		AK048280	Il20rb	A730017C20Rik	Ppp1r12b		Hs6st1	2	Zfp619	6	S3-12	4	Lhfpl2	2
Erf	Ror1	Tbc1d8	DQ566736		Clstn2	AK019838	Ndst1	AK039607		Hydin	2	Zfp536	6	Sbno2	4	Limch1	2
Fgf1	Tmem53	Aox1	DQ697070		AK048710	Diap2	Ppargc1b	AK039624		Ier5l	2	Zfp407	6	Sec14l2	4	Lims2	2
Pax8	Ephb2	Cps1	DQ707526		Hdlbp	Xkr4	Nedd4l	AK040104		Ifltd1	2	Zfp353	6	Shroom3	4	Lphn1	2
Lgmn	Slc2a9	Sh3bp4	mKIAA0703		Plekha7	B3gat2	Lipg	Prkg1b		Igf1r	2	Zfp326	6	Snx10	4	Lrrc30	2
Ptprf	Ppef2	Pigr	EG406223		Itpr1	Lmbrd1	DQ548994	Pik3cg		Igsf21	2	Zfp324	6	Srd5a1	4	Lrrc62	2
Wfs1	Tmem119	Nav1	Kcnk7		Tbc1d7	4931408C20Rik	Sall3	A630012P03Rik		Irs2	2	Zfp13	6	Sstr2	4	Lsamp	2
Ecsit	BC023744	Nos1ap	Txlna		AK049264	Aff3	BC044868	Npsr1		Itga9	2	Zcchc6	6	Sulf2	4	Lysmd4	2
Rpl8	Bcl7a	Grem2	Grm4		Mgat5b	Pdcl3	AK019124	AK041762		Itpr1	2	Vrk1	6	Susd4	4	Magi1	2
Opn4	Gtf2ird1	D230039L06Rik	BC072620		8430406I07Rik	Mrps9	Apba1	AK041976		Kcnk12	2	Veph1	6	Tgfa	4	Map2k2	2
Abt1	Sdk1	Ephx1	Acsl6		AK050091	AK219219	Minpp1	AK042514		Kctd1	2	Ubl3	6	Tmem104	4	Map3k7	2
Rgl1	Flt1	Dusp10	OTTMUSG00000015762		Stxbp3a	Ikzf2	Ppp1r3c	Chd7		Kif12	2	Tshz2	6	Tmem110	4	Mbnl2	2
Vapb	Lmod2	Lamb3	EG639653		AK050866	Serpine2	Tnks2	AK042843		Lama1	2	Trerf1	6	Tnfaip8l1	4	Mds1	2
Slc7a9	Tbxas1	Bves	Rapgefl1		Nans	Cxcr7	Fer1l3	AK042904		Letmd1	2	Tmem132b	6	Tnfrsf19	4	Megf11	2
Pard6b	Kiaa0819	Ppa1	Itga10		AK051160	Pdcd1	Sorbs1	AK042944		Lgmn	2	Ston2	6	Tnrc5	4	meis2a	2
Cml4	Gpr19	3110049J23Rik	Sap25		Ccnl1	2310035C23Rik	Sh3pxd2a	AK042948		Lhfpl2	2	Stac2	6	Tns3	4	Meox1	2
Akr7a5	Rerg	Rab36	Angpt2		Rbm26	Cxcr4	Adrb1	AK043303		Lmo2	2	Smad9	6	Trim25	4	Mical2	2
Mrps36	AK139687	Col18a1	Csk		Arhgap22	Tbx19	AK085201	AK043460		Lmo7	2	Slc45a1	6	Tshz2	4	Mical3	2
1110002H13Rik	Gltscr1	Agpat3	Mip		mKIAA0665	Fmo9	Cdk9	AK043531		Lrrc62	2	Slc38a4	6	Upp2	4	mKIAA0515	2
Timm50	Foxa3	Ndufs7	Ppp2r5d		Col14a1	Slc30a10	9130404D14Rik	Heg1		Lrrc8d	2	Slc25a21	6	Usp12	4	mKIAA0703	2
Klhl10	Bcam	Chst11	Accn2		Lhfpl2	Akap7	Crb2	AK043659		Map3k14	2	Scml4	6	Vegfa	4	mKIAA0903	2
4921520G13Rik	Irgq	Stab2	Acta1		Slit2	Arhgap18	Upp2	AK043919		Map3k5	2	Ryr1	6	Vti1a	4	mKIAA1272	2
Btbd14a	Lmtk3	Fgd6	Agtrap		AK053224	Lama4	Pkp4	AK043964		Mapkap1	2	Rnf144b	6	Xpo1	4	mKIAA1422	2
Tmem174	Slco3a1	Nr2c1	Sparcl1		Lrrtm1	Tube1	AK146150	Brunol4		Mboat1	2	Rhobtb2	6	Zbtb16	4	mKIAA4191	2
Deb1	Sbk1	AK038827	Padi1		Exoc1	Ostm1	Agps	Rabl4		Med24	2	Ptprm	6	Zubr1	4	Msi2	2
Susd2	4933400E14Rik	Rassf3	St6galnac4		AK053994	Hsf2	Anapc1	AK044422		Minpp1	2	Prss35	6	4632417N05Rik	3	Ncor2	2
Slc16a14	Zfp358	Tns3	Tcap		Sema5a	Pcbd1	Tgm2	AK044449		mKIAA0387	2	Prdx6-rs1	6	4933407H18Rik	3	Ndufa10	2
2410008K03Rik	Pnpla6	Grb10	Theg		Tmco7	Col13a1	Gm826	Rbm14		mKIAA0640	2	Polrmt	6	5730437N04Rik	3	Nfib	2
Ctbs	Vps36	Xpo1	Timeless		9930021J17Rik	Ctnna3	Mafb	Usp24		mKIAA0665	2	Plxnc1	6	5730455O13Rik	3	Nkd1	2
Usp20	Dusp4	Wwc1	Lynx1		Fbxo21	AK044689	AK021192	meis2a		mKIAA1626	2	Pik3cg	6	9130404D14Rik	3	Nkx6-2	2
Slc6a19	Mfhas1	Phf15	Twf2		AK076700	Snrpf	Sulf2	Pbx1		mKIAA3015	2	Pigo	6	A2bp1	3	Nmnat3	2
1110008J03Rik	Dlc1	Fstl4	Snai3		AK076771	AK029692	Zfp217	AK045700		Mrps22	2	Pde4d	6	A730017C20Rik	3	Nptxr	2
Acyp2	Odz3	Rad50	Syt3		AK076840	Plxnc1	Cbln4	FHOS2		msi2	2	Pbp2	6	Abat	3	Nuak1	2
Klhl24	Sin3b	Shmt1	Rabgef1		AK076842	Cradd	AK019836	Rbms3		Mthfd1l	2	Osbpl7	6	Abcc4	3	Ociad2	2
Ifi27	Gab1	Dnahc2	Pdxp		AK076847	Eea1	Pag1	Pde8b		Myo10	2	Nr5a2	6	Abcc6	3	OTTMUSG00000008561	2
9130017N09Rik	Cdh13	Rtn4rl1	U2af1		Drctnnb1a	AK039362	Fabp5	Tacc1		Napsa	2	Nr3c2	6	Abhd2	3	Pcbp3	2
Asb7	Rab39	Ap1gbp1	Pcbd1		Dars	Tmtc2	Tbl1xr1	Tle1		Nebl	2	Nlgn1	6	Acat1	3	Pde8b	2
Caskin2	Cgnl1	Samd14	Eif1b		AK078566	Ppp1r12a	Skil	Actr5		Nmnat3	2	Nck2	6	Acly	3	Pdgfra	2
Myoz3	C530008M07Rik	Nsf	Haghl		Tmprss4	Pawr	Tm4sf4	Magi1		Nt5c2	2	Msrb3	6	Acsl1	3	Pgs1	2
Eps8l3	Bckdhb	BC029169	Krt5		Mapkapk3	Ifng	D630023B12Rik	AK046920		Nt5e	2	Mrps28	6	Adh4	3	Phldb1	2
Slc22a13	Spsb4	Rhbdf2	Itgb1bp3		AK079818	AK076664	BC086805	Coro2b		Nup50	2	mKIAA4044	6	Agt	3	Plec1	2
Flnb	Scn11a	Wdr45l	2210415F13Rik		AK080222	Cobl	BC048678	Sfrs15		Odz4	2	mKIAA1382	6	Agxt	3	Ppp1r12b	2
Bspry	C85492	AU021838	Exosc6		AK080422	Gapdh	Efna3	Myst4		Opcml	2	Mex3c	6	Ahcy	3	Ppp2r2c	2
Car9	Psma6	Gphn	Creld2		AK080684	Tlk2	Ensa	AK048592		Paqr5	2	Mast4	6	AI661453	3	Prkcb1	2
Osta	Mta3	Rgs6	Gpr146		Anks1	AK007042	AK036289	Megf11		Pard6b	2	Map2k6	6	AI851790	3	Prkcz	2
Chd4	AK041437	Foxn3	Mrgprh		AK081271	AK053334	Sgms2	AK048995		Pax2	2	Ltbp4	6	Ajap1	3	Pthr1	2
Gsn	Ccdc23	Rin3	Tas1r3		Herpud1	Itsn2	AK015203	Spock1		Pax5	2	Lrp3	6	AK004252	3	Ptpn14	2
Cldn19	Emid2	mKIAA1188	Krt25		Lrrk1	4930579E17Rik	Chd7	AK049068		Pde10a	2	Lphn3	6	AK006138	3	Ptprm	2
Ush1c	AK191823	Glrx5	Strn4		Sncaip	AK018924	AK088920	AK049838		Pde4d	2	LOC171266	6	AK006461	3	Ptpru	2
Crocc	B230118G17Rik	Rapgef5	Spata20		Syn3	Clec14a	Mup3	Dcp1b		Pde9a	2	Lingo2	6	AK006839	3	R3hdm2	2
Zfp629	AK154190	Cdkal1	Chd3		Aff1	Fbxo33	Rgs3	AK050844		Pdzk1	2	Kcnb2	6	AK015628	3	Rad52	2
Baiap2l2	1810030O07Rik	Bmp6	Guca1b		Wwox	Arf6	Ptprd	AK050940		Pdzk1ip1	2	Jarid2	6	AK019125	3	Rai1	2
2210020M01Rik	Slco5a1	Ddx46	Mmp21		Slc35f3	Esrrb	Nfib	Bpag1		Phf17	2	Ing2	6	AK034027	3	Rasgef1a	2
Stard8	Kcnb2	H2afy	U46068		Pax3	Sel1h	D530005L17Rik	Mpdz		Pla2g6	2	Impad1	6	AK039624	3	Rasgef1c	2
Plec1	Als2cr11	Tgfbi	Ankrd23		Usp47	Glrx5	Ror1	Tbx20		Plac8l1	2	Il3ra	6	AK039734	3	Reep1	2
Espn	Cryga	Srd5a1	Tdg		Lrp2	Bcl11b	Lepr	Arhgap26		Plau	2	Il20rb	6	AK040671	3	Rere	2
Acox1	Nmur1	Iqgap2	Map3k13		Ndfip2	Muted	Ppap2b	AK052627		Plekha7	2	Hunk	6	AK041797	3	Rftn1	2
Clmn	Slco6b1	Camk2g	Ankrd13b		AK084679	Ofcc1	AK076555	Lhfpl2		Plekhm1	2	Hlx	6	AK044426	3	Rgs3	2
Fhod3	4922505E12Rik	Vcl	Gpbar1		AK085459	Dtnbp1	Phc2	AK053224		Plekhm2	2	Hivep1	6	AK050283	3	Rimbp2	2
9030205A07Rik	Cpsf6	Hacl1	Sephs1		AK085477	AK165697	Ptp4a2	E030049G20Rik		Pllp	2	Hip1	6	AK051055	3	Rnf207	2
Rdh5	BC025885	Rfg	Plch2		Trhde	Trpc7	Ccdc21	Gfod1		Polr3e	2	Gtf2ird1	6	AK082314	3	Rps6ka2	2
Pde4d	Adra1b	Wdfy4	4933429F08Rik		AK085818	Cnt3	Srrm1	AK053505		Pou6f1	2	Grm8	6	AK087886	3	Rtn4r	2
Ncor2	Olfr315	Parp4	Adm2		AK085995	Nlrp4f	Myom3	AK054042		Prickle1	2	Grem2	6	AK089217	3	Schip1	2
Slc4a4	Efcab5	Gjb2	Abr		Gmds	6D	Zbtb40	Atp2b2		Prkcbp1	2	Gpr98	6	AK133032	3	Sec14l1	2
Ush2A	Abca6	Ebpl	Gtl2		AK086149	AK018847	Capzb	AK076665		Prkce	2	Gm96	6	AK141527	3	Sema7a	2
Nr4a3	Tex19	Loxl2	Pscd2		Slc13a3	Wdr41	Zubr1	AK076739		Prmt8	2	Gm833	6	AK145218	3	Sergef	2
Ntng1	Hectd1	fad123	Psmd4		AK086959	Adamts6	C79267	AK076794		Pthr1	2	Gm672	6	AK146386	3	Serhl	2
Scn5a	Hist1h2aa	Abcc4	Hecw1		AK086971	Ankrd55	Klhdc7a	AK076831		Ptpn13	2	Gfod2	6	AK164976	3	Sfrs15	2
Centd2	Ofcc1	Prlr	Synj1		Gpr56	Emb	Padi1	AK077163		Ptprs	2	Gab1	6	Alb	3	Sgsh	2
Treh	Cap2	Fbxl7	Shank2		AK087624	Nr1d2	Arhgef19	2310040C09Rik		Ptpru	2	Fgf20	6	Aldh18a1	3	Shank2	2
Rabggta	Kif13a	Fam105b	CaV1.2-a		Glis3	4930474N05Rik	mKIAA1337	mKIAA0397		Pvrl1	2	F2r	6	Aldh9a1	3	Shfm1	2
Dhrs7c	BC030046	Ncald	Wwc1		Fbln2	Ddhd1	Slc25a33	Large		Rab11fip3	2	Errfi1	6	Angptl6	3	Ski	2
Fndc1	Defb30	Depdc6	Kif21b		Atp9a	Peli2	AK033051	AK078896		Rab3ip	2	Erlin2	6	Ankrd55	3	Slc12a8	2
Zbtb20	Timm8a2	Eif2c2	Park2		AK089373	V2r3	Gm833	AK079012		Rere	2	Epm2a	6	Antxr2	3	Slc24a2	2
Diws1t	1810044A24Rik	Csf2rb	Slc24a3		myo 10	VR3	5930403L14Rik	AU040829		Rgl1	2	Eml1	6	Apoa5	3	Slc26a7	2
AK006923	Ldoc1l	Tmprss6	Elmo2		Dock9	Fgf9	Actrt2	Rps6ka3		Rnf144b	2	EG328264	6	Arg1	3	Slc2a1	2
1700020N01Rik	Ephb3	Mchr1	Rwdd3		Cecr2	Defb43	Cdk6	AK079188		Sall1	2	Dsp	6	Arhgap22	3	Smarcc2	2
1810013D10Rik	Slc9a10	Cyb5r3	mKIAA0327		Fto	AK019672	Smarcd3	Max		Scn5a	2	Dlgap1	6	Arhgef12	3	Smox	2
2010301N04Rik	App	BC021523	Pcdha4		AK131776	Tdrd3	Hmx1	Zfp694		Sdcbp	2	Dlc1	6	Arhgef19	3	Smyd4	2
AK010122	4932702K14Rik	Tmem117	Mgat5		AK131834	Dach1	Msx1	Samd12		Sdk2	2	Dclk3	6	Arid2	3	Snf1lk	2
Arhgap26	Hsf2bp	Dnaja3	Ict1		AK132084	2410129H14Rik	Cpeb2	Hspg2		Secisbp2	2	D3Bwg0562e	6	Arid5b	3	Sntg2	2
mFLJ00022	Notch3	Ahsg	1110034G24Rik		AK132190	Klf5	Ppargc1a	Lrrk1		Sema4d	2	Cysltr2	6	Asgr2	3	Sorcs2	2
Ttll10	AK019598	Hrg	Cd97		Cdh26	2610206B13Rik	Rbpj	Frem2		Setbp1	2	Cpm	6	Atoh8	3	Sox6	2
4833439L19Rik	Pabpc2	masp3	Pde3a		Fbxo11	Rap2a	Slain2	AK082264		Sfxn5	2	Col8a1	6	Atp6v1a	3	Speg	2
AK015336	Napg	Bcl6	1700012H17Rik		AK133010	AK083927	Afp	Klhl7		Shb	2	Col19a1	6	AU042671	3	Spock1	2
4930563E19Rik	AK085533	Il1rap	Iqce		AK133014	Ank	Cds1	Sema6a		Slc22a18	2	Cldn14	6	Auh	3	Srgap1	2
AK016283	Zfp217	Lmln	Tmc7		Myom1	Ncald	AK169507	AK082731		Slc25a30	2	Chd7	6	B4galt5	3	St18	2
4931403E03Rik	AK133337	Nr1i2	Lrrc27		AK134490	Csmd3	AU042671	AK082869		Slc34a1	2	Cgnl1	6	Banp	3	Stard3	2
AK017086	evi-1	Alcam	Mgll		Evl	Sntb1	Hip1r	Tbc1d19		Slc35f3	2	Cetn3	6	BC010304	3	Stat1	2
AK017337	A730037C10Rik	Robo1	AK007095		AK135471	Prickle1	Ncor2	mKIAA1070		Slc6a6	2	Cdkn1a	6	BC013481	3	Stat2	2
mKIAA4009	Tmem79	Itsn1	AK007112		cbp146	Sema5b	Vps37d	Pftk1		Smurf1	2	Cdh13	6	BC029169	3	Stk39	2
5730559C18Rik	AK019752	Cldn14	AK007174		AK136047	AK038731	Actb	Dtnb		Snf1lk	2	Casr	6	BC033915	3	Sufu	2
Tmod2	AK079194	AK037512	1810073N04Rik		Pld1	Ccdc54	Trrap	mKIAA0387		Snx8	2	Card11	6	BC044868	3	Syt11	2
Tmem19	Pdha2	Igsf5	Med27		AK136128	AK151508	AK021342	Msi1		Spsb4	2	Cabp1	6	BC046508	3	Tbce	2
9030409G11Rik	Npr2	Dscam	AK012661		mKIAA1998	DQ687660	Chn2	AK084074		Srbd1	2	C130038G02Rik	6	BC048601	3	Tcf3	2
Rps19	Ccin	5730437N04Rik	AK012713		Lfg	BC042696	Mat2a	Neo1		Ssx2ip	2	Bcl7a	6	Bcor	3	ten-m4	2
AK018891	Exosc3	Synj2	Dpf3		mKIAA0634	Nrip1	Adipor2	Ext2		Sufu	2	BC100494	6	Blk	3	Theg	2
AK019036	Adamtsl1	Tcte2	Anxa6		Lmo7	2610039C10Rik	Slc6a13	AK085316		Sumf1	2	BC099544	6	Brap	3	TIPR	2
AK019585	Ptpru	Sepx1	kiaa1322		AK137923	Atp5o	Parp11	AK085341		Syne2	2	BC048403	6	Btbd16	3	Tmem112	2
Pde7b	Pramel1	Hagh	Aff3		AK138161	Dyrk1a	AK139687	AK085342		Taf5l	2	BC013481	6	C130039O16Rik	3	Tmem131	2
A930001N09Rik	Art3	Ppard	Tcf4		AK138348	ORF9	Rassf8	AK085420		Tanc1	2	B230120H23Rik	6	C21orf63	3	Tmem179	2
Myo10	Gm52	Pnpla1	Gpatc1		Cdc42bpa	Pacsin1	Gltscr1	AK085459		Tas1r2	2	Arid1b	6	C79267	3	Tns3	2
Ccdc67	Lat2	Rdbp	AK014626		AK138849	2300002M23Rik	Chst8	Slc15a1		Tbc1d1	2	Arhgap18	6	Cadm1	3	Tpd52	2
Msi2	Exoc4	Ent1	4833409A17Rik		Iqca	Pgk2	Zfp536	AK085522		Tbc1d22b	2	AK090268	6	cAMP-GEFII	3	Trak1	2
Antxr1	Cd9	Pcaf	Dscaml1		AK139772	AK088204	C80913	Trhde		Tegt	2	AK082432	6	Car5a	3	Trhr2	2
Arid5b	Ethe1	Dpp9	Lrrc9		AK139810	Efhb	AK045483	AK085792		ten-m4	2	AK076755	6	Cd302	3	Trim32	2
Elmo1	Ffar1	Ptprm	AK015336		AK140089	Sult1c1	AK149394	Ank		Tle3	2	AK051495	6	Cdh2	3	Trim62	2
Gopc	Zfp536	Myom1	AK015423		Dym	Fert2	BC070425	Rora		Tln2	2	AK043659	6	Cdh23	3	Trpm3	2
Gpc6	Gprc2a-rs5	alk	Sufu		Trim2	AK019598	Odz4	mKIAA1422		Tmco4	2	AK039734	6	Cdk6	3	Trpm8	2
Clgn	Stk22s1	Fez2	AK015944		Rp1	Epb4.1l3	AK031221	AK086290		Tmem131	2	AK039574	6	Cebpa	3	Trrap	2
Atpbd4	AK021299	Ttc7	Scube2		AK142161	Vit	Slco2b1	Exoc4		Tmem16f	2	AK037623	6	Celsr1	3	Tsc2	2
Slain1	Trpm4	Cdh2	4933407C03Rik		Tbc1d14	AW548124	2900057K09Rik	2310079N02Rik		Tmem189	2	AK034282	6	Chd7	3	Ttc3	2
Srl	Dchs1	Epb4.1l4a	Ica1		TIPR	Zfp36l2	AK009335	AK086741		Tmem2	2	AK033454	6	Cmklr1	3	Ttll11	2
Fto	E430018J23Rik	Hsd17b4	Cpvl		AK143902	1700106N22Rik	Cacng3	Plekhh2		Tmem26	2	AK030448	6	Cpn2	3	Tubgcp6	2
AK037512	Tktl2	Gramd3	Herc3		Camta1	Prkce	Zfp694	AK086971		Tmem39b	2	AK019722	6	Crcp	3	Ulk4	2
mKIAA0168	Tmem16h	Atp8b1	Ephb2		AK144563	Gm944	DQ686437	9630058J23Rik		Tmpo	2	AK012506	6	Creg1	3	Ush2a	2
Osbpl6	Ddx19b	4933403F05Rik	BC033915		AK144886	D0H4S114	Ate1	BC031353		Tmprss2	2	AK007305	6	Csf2rb	3	Vash1	2
Secisbp2	Phldb1	Lipg	Cdgap		Adamts20	Sncaip	Btbd16	Egflam		Tnrc6a	2	AK007006	6	Csmd1	3	Wasf3	2
Nudt13	Grm2	Gm672	6130401L20Rik		Map3k7	AK036466	AK080057	Smyd3		Trak1	2	AK006709	6	Cyb5	3	Wwc1	2
Map3k14	Tessp2	Pqlc1	1700034M03Rik		Glis1	Sh3tc2	Mgmt	Btbd9		Tshz2	2	AK005678	6	Cyb5r3	3	Zcchc14	2
Mfsd4	AK033245	AK144662	mKIAA1102		AK146150	4930465K10Rik	Muc6	Vrk1		Tshz3	2	AK003327	6	Cyp17a1	3	Zdhhc14	2
Dpf3	1700014N06Rik	Dak	Mcm10		Cdkn3	Pard6g	NR_002452	AK088579		Ttc32	2	Aebp2	6	Cyp8b1	3	Zfand3	2
Pde10a	Cpa6	Gnaq	Os9		AK146386	Psat1	Ccnd1	1200014M14Rik		Ttll10	2	Adamtsl1	6	Daam1	3	Zfp3	2
AK039634	Kcnb2	Pi4k2a	Opcml		PMCA2	Ankrd15	AK082314	Nova1		Ttll11	2	Adamts7	6	Dazap1	3	Zfp423	2
A430065P19Rik	Kcnq5	D19Wsu162e	Sema4b		Phf15	AK052572	Tmem28	Setd6		Ubiad1	2	Adamts20	6	Ddx58	3	Zfp469	2
Epb4.1l5	Hs6st1	Cyp17a1	Syn2		Ankrd15	Pnlip	BC052524	Gse1		Usp24	2	Actl7b	6	Dnahc5	3	zfp507	2
AK040671	Arid5a	Tectb	St3gal2		mKIAA0804	Csf2ra	1700094C09Rik	Srgap3		Usp29	2	9030205A07Rik	6	Dnmbp	3	Zfp653	2
Nmnat3	Lipt1	Cdc123	Stk4		Klf7	Prkcq	Thap1	Habp2		Vangl1	2	2010300C02Rik	6	Dpy19l3	3	Zmiz1	2
AK042016	Hecw2	Nebl	Msra		Ppara	Ppp6c	AK040224	4930519N13Rik		Vapb	2	1700106N22Rik	6	DQ551402	3	40606	1
Nol9	Gpr1	Vav2	Dner		Cp	Kynu	Fat1	D630045J12Rik		Vasn	2	1700014N06Rik	6	Dusp10	3	40790	1
Hnt	D1Bwg1363e	Slc25a25	Ssx2ip		Sema4d	Arhgap15	Mtnr1a	Bcor		wdr4	2	1700011F14Rik	6	Dysf	3	40791	1
AK043964	Gli2	Fpgs	Msi2		AK154427	Mbd5	Mlf1ip	Fto		Wdr91	2	Znf326	5	E330026B02Rik	3	40795	1
Hydin	Tmcc2	Nek6	Calb2		Lpin1	Tank	Ttc29	Armc2		Wwox	2	Zmat3	5	Ece1	3	1110018H23Rik	1
Sarm1	Lrrn2	Ppp6c	Anks1b		Arid3a	Grb14	Gpt2	AK131742		Zbtb20	2	Zfp791	5	Efhd2	3	1110018J23Rik	1
Lrrfip1	Gpa33	Gpd2	Kcnj12		Parp8	AK146150	Abcc12	Gucy2d		Zfp536	2	Zfp668	5	Eif1	3	1110020G09Rik	1
Syt6	Vangl2	cAMP-GEFII	Ptprs		AK156148	Zfp804a	Sall1	AK132134		Zzz3	2	Zfp647	5	Ephb1	3	1110034G24Rik	1
Cacna2d2	Kcnk2	B230120H23Rik	AK032654		AK156678	Olfr1310	BC100534	Sox5		40791	1	Zfp36l2	5	Ext2	3	1110059E24Rik	1
Per2	Prox1	Ext2	Anxa4		AK158034	Zfp217	Cdh5	Acan		40794	1	Zfp324	5	F10	3	1110061O04Rik	1
Jam2	Ust	Slc27a2	Meis1		Lamb1-1	Dok5	Cdh1	2610021K21Rik		40795	1	Zfp282	5	F2rl1	3	1200014M14Rik	1
Fndc3b	Pde7b	Ckap2l	Vav3		Gm628	Gnas	Wwox	Lmnb2		0610011L14Rik	1	Zfand3	5	Fat3	3	1500001M20Rik	1
Clcn6	C030003D03Rik	Atrn	Fa2h		Fgf9	Cdh26	AK133333	AK133024		0610025P10Rik	1	Zbtb7c	5	Fndc3b	3	1500019G21Rik	1
4921528H16Rik	Ddo	2210009G21Rik	Slc24a2		2310058O09Rik	1700008P02Rik	Pkd1l2	Ccdc24		0610040J01Rik	1	Ywhab	5	Foxd2	3	1600002O04Rik	1
Rab37	Foxo3a	H13	Pcbp3		alk	Stmn2	4632417N05Rik	BC062185		0910001A06Rik	1	Xkr6	5	Foxk1	3	1600029D21Rik	1
traf4	AK158018	Uqcc	4631426J05Rik		AK159017	Mrps28	Banp	Gm920		1110002H13Rik	1	Wwox	5	Foxp4	3	1700008G05Rik	1
Pdhx	Gja1	Ctnnbl1	AK035738		Arhgap25	DQ556070	AK085459	AK133333		1110008J03Rik	1	Wdr75	5	Frmd4b	3	1700009N14Rik	1
Arhgap8	Adamts14	Sulf2	9630014M24Rik		AK160437	AK134652	AK050164	AK134426		1110018J23Rik	1	Wdfy3	5	Ftcd	3	1700011F03Rik	1
Il1r1	Arid5b	2010011I20Rik	AK035994		AK160921	Ankrd50	Fat3	Hhat		1110036O03Rik	1	Vit	5	Gcgr	3	1700012H17Rik	1
AK048775	EG333669	Gmeb2	Mapk10		Tmprss2	AK132084	AK015174	A2bp1		1190002A17Rik	1	Veph1	5	Gcnt7	3	1700018B08Rik	1
Megf11	Slc5a4a	Fndc3b	AK036307		Sdk2	Trim59	AK076840	Auh		1190005I06Rik	1	Ust	5	Gjb2	3	1700021F05Rik	1
Slc25a25	Chst11	Phf17	Epn2		1500002O20Rik	AK205332	Arhgef12	mKIAA1889		1200015F23Rik	1	Usp44	5	Gli2	3	1700021F07Rik	1
Mgat5	Osbp2	Foxo1	Trak2		Mat2a	Tbx15	AK140089	AK135726		1500002O20Rik	1	Txlnb	5	Gm628	3	1700025G04Rik	1
Acin1	Ankrd36	AK040671	mFLJ00177		Pcmtd1	Rbm15	Pou2af1	mFLJ00022		1600021P15Rik	1	Tubb6	5	Gm672	3	1700034M03Rik	1
2210009G21Rik	Slit3	Rsrc1	D030051N19Rik		Tshz2	Celsr2	40800	AK136034		1600029D21Rik	1	Tuba3b	5	Gng7	3	1700054N08Rik	1
AK050558	Myo15	Chd1l	Pecam1		ten-m4	AK079194	AK006934	Ldlrad3		1700001K19Rik	1	Tuba3a	5	Gorasp1	3	1700067P10Rik	1
Gtf2ird1	Ntn1	Elovl6	AK038386		4933437K13Rik	Rpl34	Gramd2	Rps10		1700015E13Rik	1	Ttc22	5	Gpc6	3	1700071K01Rik	1
Sdk2	Coro6	Papss1	Car10		4632428N05Rik	Eif4e	AK018968	AK136642		1700019O17Rik	1	Tshz3	5	Gpr109a	3	1810011O10Rik	1
Tmtc2	Mrc2	Adh4	Pbx4		Slc6a6	Fut9	Ctsh	AK136683		1700020N01Rik	1	Trpm4	5	Gpt2	3	1810013D10Rik	1
Tns1	Kcnj16	Pdlim5	AK038827		AK163121	Cnr1	E330026B02Rik	AK137033		1700021F07Rik	1	Trpc7	5	Gramd3	3	1810041L15Rik	1
AW456874	Slc7a15	Gne	AK039090		AK163160	AK045932	Bcor	Phf21a		1700025G04Rik	1	Triml1	5	Grhpr	3	1810046K07Rik	1
Igsf9	Trim9	Grhpr	AK039113		Slc7a14	1700009N14Rik	Msc	AK138215		1700029J07Rik	1	Trim59	5	Grip1	3	1810073N04Rik	1
AK053772	AK014974	Slc44a1	AK039125		AK163475	Tdrd7	AK195788	AK138462		1700081D17Rik	1	Trhde	5	Gse1	3	2010004A03Rik	1
Arhgef10	Pfkp	Zfp462	AK039238		AK163592	AK133250	Dst	Spnb3		1700088E04Rik	1	Tpte2	5	Gsta3	3	2210415F13Rik	1
0910001A06Rik	Rreb1	Epb4.1l4b	ten-m4		Nrxn2	Rgs3	Plekhb2	Srd5a2l		1700120B06Rik	1	Tmtc2	5	Gtf2i	3	2310022M17Rik	1
Dcun1d4	Edg3	Mpdz	AK039577		BC057079	Jmjd2c	Arid5a	AK139229		1700125F08Rik	1	Tmpo	5	Gulo	3	2310040C09Rik	1
AK077135	Habp4	Pcsk9	Pitpnm3		Tpm3	Ppap2b	AK019601	jnk1		1810012P15Rik	1	Tmem184a	5	H6pd	3	2310065K24Rik	1
AK079222	Mmrn2	Ssbp3	AK039720		Ctnnd2	AK079012	Mgat4a	Gm1965		1810013D10Rik	1	Tmem182	5	Haao	3	2310079N02Rik	1
Lrrc8d	9130227C08Rik	Scp2	Akt1		Dync1i2	Aof2	Aff3	AK139528		1810013L24Rik	1	Tmem161b	5	Hectd2	3	2410002O22Rik	1
Wbscr17	AK045385	4931406I20Rik	Lama2		AK164829	Igsf21	Map4k4	AK139810		1810015C04Rik	1	Tktl2	5	Herpud1	3	2510009E07Rik	1
AK082086	Sema5a	Grik3	Ppp1r16b		Slco2a1	AK136146	Il1r2	Foxp1		1810073G14Rik	1	Tex18	5	Hhex	3	2600010E01Rik	1
AK082731	Pdzrn4	Bai2	Map4k2		Notch4	Hgf	Tpp2	meis2a		2010004A03Rik	1	Tbx5	5	Hmgcl	3	2610021K21Rik	1
BC005764	C230021P08Rik	Ddefl1	C130038G02Rik		9430076C15Rik	AK046351	Ndufb3	AK140370		2010301N04Rik	1	Tbx19	5	Hnf4a	3	2610507B11Rik	1
mKIAA3015	Acvrl1	Pla2g5	Chd7		Mbnl2	Magi2	AK219417	AK140583		2210009G21Rik	1	Tbc1d9	5	Hp	3	2610528K11Rik	1
PBX1a	Grasp	Zubr1	C85492		AK167957	Xrcc2	AK136844	Limch1		2210020M01Rik	1	Tbc1d4	5	Hpd	3	2810022L02Rik	1
Prkce	Rtp1	Aldh4a1	Gse1		Apbb2	Insig1	Pard3b	Zfp469		2310004N24Rik	1	Tbc1d1	5	Hrg	3	2810032E02Rik	1
AK085420	Ildr1	Epha2	AK043153		Wdfy2	A230054D04Rik	Nrp2	Odf3l1		2310016E02Rik	1	Tas2r134	5	Ifitm1	3	2810457I06Rik	1
AK085438	Gpr156	Efhd2	Stmn2		0610011L14Rik	BC099582	erbB4	AK142431		2310022B05Rik	1	Tanc1	5	Igfbp1	3	2900075B16Rik	1
Fanci	BC050980	Nphp4	Adss		Pik3ap1	Tbc1d1	AK163572	isl1-beta		2310028H24Rik	1	Syt13	5	Irx4	3	3110006E14Rik	1
Itgb6	Boc	AK205032	Ece2		Laptm5	Pea15b	Fn1	AK143160		2310039E09Rik	1	Stox2	5	Itsn1	3	3110035E14Rik	1
Snx29	Alcam	Crot	AK043964		Suclg2	Fgf5	AK135370	TIPR		2310045A20Rik	1	Stmn2	5	Kalrn	3	4632411B12Rik	1
Sntg2	AK157499	Phtf2	Celf3		Tmem2	AK048739	40606	AK143789		2310058O09Rik	1	Stk10	5	Klf10	3	4632425D07Rik	1
Pdgfb	Col8a1	Dpp6	Brunol4		Gm672	AK044041	Rpl37a	AK143924		2310061J03Rik	1	Stard13	5	Klhl2	3	4732495G21Rik	1
Esd	Ckt2	4933407H18Rik	Slc24a4		B230112C05Rik	AK020506	BC100504	Camta1		2310067B10Rik	1	Ss18	5	Ksr1	3	4831426I19Rik	1
Tpcn2	Robo2	Rgs12	Cacna2d2		Plekha6	Cmklr1	AK079660	AK144610		2410004B18Rik	1	Srgap1	5	Ky	3	4833409A17Rik	1
1810073N04Rik	Nrip1	BC013481	Lat2		Dhtkd1	2210016L21Rik	Vil1	Cradd		2410008K03Rik	1	Spesp1	5	Lifr	3	4921511C20Rik	1
Mlc1	Bach1	Alb	AK044789		AK177749	Mylc2pl	Pax3	AK144912		2410016O06Rik	1	Slc9a10	5	Lpp	3	4921528I01Rik	1
Myo10	Snx9	AK044414	Evc2		AK180240	Flt1	Scg2	Tcf4		2410129H14Rik	1	Slc4a3	5	Lrp1	3	4922505E12Rik	1
Ddef1	Mdga1	Cds1	Enox1		Gsn	Katnal1	mKIAA1486	Ccdc66		2600001A11Rik	1	Slc47a2	5	Lrp5	3	4930471G03Rik	1
Phf17	Dnahc8	Pitpnb	Pdhx		AK188320	Sgce	Ptma	Map3k7		2610039C10Rik	1	Slc35f3	5	Lrrfip1	3	4930473A06Rik	1
5330421F07Rik	Tmem63b	Mn1	B430006D22Rik		AK199184	Mdfic	Atg16l1	AK145614		2610204M08Rik	1	Slc2a13	5	Maf	3	4930519N13Rik	1
Varp	Prph2	Tpst2	Eif4g3		AK205379	Ankrd7	AK016592	AK146230		2610528K11Rik	1	Slc25a21	5	Map3k5	3	4930544G21Rik	1
Armc2	mKIAA4044	Myo18b	Plec1		AK214332	D6Wsu176e	Iqca	AK146386		2700049A03Rik	1	Slc22a16	5	masp3	3	4931440F15Rik	1
Rps6ka2	Epb4.1l3	Cit	Spef1		AK216819	Exoc4	Cxcr7	Tcf3		2810003C17Rik	1	Slc16a9	5	Mctp2	3	4932438H23Rik	1
AK132084	Dlgap1	Taok3	Chst10		Celsr1	Akr1b3	Twist2	Bdh1		2810451A06Rik	1	Sipa1l1	5	Mgmt	3	4933425L03Rik	1
Gab1	Emilin2	AK169507	Sec14l1		Csmd2	Akr1d1	Capn8	Camta1		2900026A02Rik	1	Sfrs6	5	Mgst1	3	4933428G20Rik	1
Cit	9430022F06Rik	Rbm19	Nedl2		Cspg4	AK002748	mKIAA0606	Kalrn		3110004L20Rik	1	Sez6l	5	Minpp1	3	4933429F08Rik	1
Cdh26	Hrh4	Sdsl	Fbxw8		Dtnbp1	Gsg1	Sctr	Lphn1		4631422O05Rik	1	Setd4	5	mKIAA0545	3	5031439G07Rik	1
Tmem108	Rit2	1300012G16Rik	AK048775		Pde4d	Rerg	Ddx18	Kiaa0819		4632411B12Rik	1	S94460	5	mKIAA0703	3	5430419D17Rik	1
Tmem16b	Sema6a	Gtf2ird1	Camk2b		Pea15b	AI987944	Dpp10	Git2		4632428N05Rik	1	Rpl34	5	mKIAA1181	3	5830416A07Rik	1
AK133987	Gm672	Por	Spock1		Cacna2d2	Dlg2	Ccnt2	AK150110		4831426I19Rik	1	Robo2	5	Mn1	3	6030446N20Rik	1
Cdh6	Cndp2	Gna12	Rspo2		AY512941	AK191080	Avpr1b	Parp11		4833439L19Rik	1	Rngtt	5	Mrpl14	3	6130401L20Rik	1
Fbxo25	1110014N23Rik	Mmd2	Srgap3		Unc13a	Ubqln3	Slc45a3	Sec24b		4921520G13Rik	1	Rnf7	5	Mylip	3	6330403A02Rik	1
Spon1	Ccdc88b	Stard13	Col16a1		Zcchc14	AK136021	Lrrn2	Aoah		4921528H16Rik	1	Rnasen	5	Myo1c	3	6330500D04Rik	1
Gpc5	AK020826	Pon1	1110012J17Rik		Arhgef3	AK133166	Pik3c2b	Pgs1		4930500O09Rik	1	Rhobtb2	5	Myo1e	3	6330514A18Rik	1
Myst4	PLC-epsilon	Asns	GOBLIN		Banp	Wwc2	Sox13	Spred-2		4930563E19Rik	1	Rap1gds1	5	Myo5b	3	6430527G18Rik	1
Ldlrad3	Nfkb2	Gig18	AK051887		Dock5	Odz3	Adora1	AK154635		4931403E03Rik	1	Rap1b	5	Nav1	3	6430548M08Rik	1
AK137033	Arhgap15	Cttnbp2	Phldb1		Atxn7l4	Siah1a	Nav1	Mpg		4931406I20Rik	1	Rad23b	5	Ncor2	3	6430571L13Rik	1
Eya2	AK017239	BC145649	Tmem16a		1810073G14Rik	Pmfbp1	9830123M21Rik	dtn-b		4933407H18Rik	1	Qrsl1	5	Nebl	3	6530401C20Rik	1
Evl1	Slc25a12	Wdr91	Col14a1		Hausp	1700018B08Rik	Kif14	AK157218		4933417O08Rik	1	Ptpru	5	Npr3	3	6530418L21Rik	1
Dock1	Rag1	Slc13a4	Lhfpl2		Rmi1	BC094642	Zfp281	AK157456		4933428G20Rik	1	Ptprm	5	Nr0b2	3	6720458F09Rik	1
AK138592	1110034G24Rik	Znf746	Rgs6		Arhgap24	1600029D21Rik	Nek7	AK158030		4933437K13Rik	1	Pthr2	5	Nr1i3	3	6720467C03Rik	1
Dctd	Dok5	Ctnna2	mKIAA4247		BC026600	Col12a1	Ivns1abp	Tns3		5330421F07Rik	1	Pten	5	Nsf	3	8430419L09Rik	1
Nfia	Evi1	Dysf	Sorcs2		Dnase1	AK049838	Niban	AK158196		5730557B15Rik	1	Psma6	5	Ntn1	3	9130011E15Rik	1
Itga9	EG56544	Slc25a26	E230008N13Rik		BC030469	Eomes	Apobec4	Plekhq1		5730559C18Rik	1	Prkcq	5	Palld	3	9530068E07Rik	1
Vash2	6330505N24Rik	Frmd4b	C030027K23Rik		Zbtb20	Las1l	AK043564	Atxn7l1		5830445C04Rik	1	Prickle1	5	Pard3	3	9530091C08Rik	1
1110018J23Rik	Kcnn3	Sumf1	Eif4g3		Dnahc8	Scml2	AK029591	Tle3		6430704M03Rik	1	Prep	5	Pcsk6	3	9630014M24Rik	1
AK220484	Kprp	Mical3	Tmco7		mKIAA1124	Rdh10	Mr1	mKIAA1643		6530404N21Rik	1	Prdx6-rs1	5	Pde4b	3	9630031F12Rik	1
H2afy	Gja8	Mboat5	Frmd6		Crocc	AK087209	Qscn6	9130011E15Rik		8430406I07Rik	1	Pptc7	5	Pdia5	3	9630041N07Rik	1
Camta1	Gpr61	Cd4	Dennd2a		BC038822	2010300C02Rik	Sec16b	AK160260		8430415E04Rik	1	Ppm1a	5	Pemt	3	9630058J23Rik	1
BC021611	1700012H17Rik	Kiaa0528	AK076734		Tshz1	Lonrf2	AOP2	Arid1b		9030205A07Rik	1	Pnlip	5	Pex26	3	9930013L23Rik	1
mKIAA0210	AK007260	Zfp324	Rnf41		BC040690	Chst10	Dnm3os	AK160416		9030409G11Rik	1	Plxnb2	5	Pex6	3	A030009A09Rik	1
AK144886	Klhl32	Cyp2b9	Auts2		Mast4	AK219219	4921528O07Rik	Myo1b		9030625A04Rik	1	Plekhk1	5	Pgd	3	A1bg	1
Hgs	Lingo2	mKIAA0545	6530418L21Rik		Crb2	Sdpr	BC056189	AK161948		9130011E15Rik	1	Plekhb2	5	Phf15	3	A230067G21Rik	1
Shb	Palm2	Gpi1	Nek7		Frap1	9430016H08Rik	Lmx1a	ten-m4		9130017N09Rik	1	Plcg2	5	Phlda1	3	A4galt	1
AK145464	Svep1	Ankrd27	AK079670		Gnb2l1	Nol5	Nuf2	Bach2		9130213B05Rik	1	Plcb4	5	Pigm	3	A630012P03Rik	1
D16Ertd642e	Trim32	Sphk2	Ltbp3		Dynlrb2	Ndufs1	AK158658	AK162140		9430076C15Rik	1	Pkd2	5	Pitpnb	3	A630038E17Rik	1
Scarb1	Adamtsl1	Sergef	Pdgfc		BC048678	4930431J08Rik	9630058J23Rik	A4galt		9530068E07Rik	1	Pitx2	5	Pitpnm2	3	A930008G19Rik	1
Zhx3	Dlgap3	Apba2	AK082503		mKIAA1870	Erbb4	Psen2	Ank3		9930021J17Rik	1	Phlda1	5	Pnpla7	3	A930034L06Rik	1
Atp11a	Ptafr	Pcsk6	Zfand3		2410004B18Rik	Pax3	Nvl	Slc6a6		A1bg	1	Phf17	5	Pon1	3	Abca2	1
Micall1	Smpdl3b	Adamts17	Dlgap2		Atrnl1	AK085943	Srp9	AK162833		A230051G13Rik	1	Pfkp	5	Por	3	Abcc12	1
mKIAA0515	Aim1l	Znf710	Pde8b		zfp507	Cdh19	Susd4	AK162930		A230106M15Rik	1	Pdzrn4	5	Ppa1	3	Abcc4	1
Fbxo41	AK019631	Uvrag	MmKIF17		Prkcd	Ddx18	BC072557	Tiam1		A2bp1	1	Pde7b	5	Ppap2b	3	Abcc8	1
Dlg5	Nphp4	Stard10	Schip1		BC052551	AK016413	Ush2a	AK163447		A430065P19Rik	1	Pde4d	5	Ppargc1b	3	Abi1	1
AK147993	Grm3	Galntl4	AK084170		Arid1b	Kif14	Prox1	mKIAA0578		A930001N09Rik	1	Pcolce2	5	Ppp1r3c	3	Ablim3	1
Plcb4	Otop1	Insc	Pxn		Tns1	DQ556157	Rps6kc1	Hlcs		AA407270	1	Pclo	5	Ppp6c	3	Abr	1
E2f6	AK017148	1700007B13Rik	4933425L03Rik		BC058417	Sec16b	AK021325	Psmb2		AA407659	1	Pcdh9	5	Pqlc1	3	Acan	1
Arid4a	Klb	Ern2	Prkcq		Shb	40817	Slc30a1	Veph-A		Aacs	1	Pccb	5	Prdm10	3	Accn2	1
AK149260	Gnrhr	Giyd2	Cdh13		BC059892	Dusp27	3322402L07Rik	AK164829		Abcc12	1	Pard3b	5	Prkcn	3	Acin1	1
Ahdc1	Fras1	Cyp2e1	AK086273		Tbc1d22b	AK046316	AK142593	Slc12a8		Abcc4	1	Osbpl7	5	Proz	3	Acss1	1
BC057627	1700007G11Rik	Pddc1	Abcc8		Obscn	Mark1	Cnksr3	apo		Abcc5	1	Osbpl10	5	Psen2	3	Acta1	1
Reps1	Wdfy3	Tspan4	KIAA0150		Zzz3	9130211I03Rik	Ust	AK169507		Abhd12	1	Olfr982	5	Ptprm	3	Actr2	1
BC052328	Arhgap24	Tfdp1	mSox5L		Usp29	Oprm1	SASH1	mKIAA4119		Abl1	1	Odz4	5	Rapgef2	3	Actr5	1
Cndp2	Adrbk2	Whsc1l1	mKIAA1914		Prkcbp1	SASH1	9130014G24Rik	Tmem18		Ablim2	1	Odz3	5	Rassf8	3	Acvr1b	1
Mapk14	Ksr2	Acsl1	Btbd9		Slc4a3	Rab32	Cited2	Mgl1		Ablim3	1	Npas1	5	Rbm19	3	Adamts2	1
mel1	Tmem132d	Nr3c2	Ptk7		BC067074	Sf3b5	AK041760	AK170868		Abt1	1	Nlgn1	5	Rbpms	3	Adamts7	1
Spred-2	Caln1	Rfx1	Thrap2		Slc44a5	Cited2	Slc35d3	Ppfia4		Acin1	1	Nfatc4	5	Rcbtb2	3	Adamtsl1	1
mKIAA0720	2310043J07Rik	mKIAA1464	Stat1		CD83	Ahi1	AK138667	Ankrd6		Acot11	1	Nck2	5	Rcl1	3	Adcyap1r1	1
2310067B10Rik	C130038G02Rik	Pkd1l2	Atp9a		Larp5	EG432436	Sgk	Atp11a		Acot7	1	Ncald	5	Robo1	3	ADD2	1
C2ta	B3galtl	Car5a	Mkl1		BC086315	Arg1	C030003D03Rik	Prdm16		Acox1	1	Myo10	5	Ror1	3	Adm2	1
Ptpn14	Rxfp2	Cbfa2t3h	Zfyve1		BC086805	Ptprk	AK040320	Brsk2		Acpp	1	myo 10	5	Rplp1	3	Adora1	1
Fyn	A430107O13Rik	AK040202	Arhgef17		Ambn	Trmt11	Bxdc1	mKIAA1358		Actl7b	1	Mta3	5	Rreb1	3	Adora2b	1
Etv6	Grm8	1300018I17Rik	mKIAA0842		Spen	1700025K23Rik	5033413D22Rik	Hpcal1		Acvr2b	1	Mobkl2b	5	Rtp3	3	Adss	1
Med24	Slc13a4	Agt	Cnksr2		Lsm6	Slc22a16	Fkhr2	AK200207		Acyp1	1	mKIAA0889	5	Runx1	3	Aebp1	1
D11Wsu99e	Zfp467	2310031A18Rik	R3hdm2		BC099513	Zbtb24	AK035573	AK205829		Acyp2	1	mKIAA0578	5	S3-12	3	Afap1	1
Vps37c	Antxr1	Egln1	Lrrc7		Slc30a10	Grik2	AK145144	Pgs1		Adamts12	1	Mfhas1	5	Sbno2	3	Agbl1	1
Tmem16f	E330021D16Rik	BC017612	Megf11		Bcas1	Zfa	Hace1	AK209885		Adamts13	1	Melk	5	Scp2	3	Agrn	1
Ston2	mSox5L	Col5a3	mKIAA1921		BC125002	AK138755	AK138755	NrCAM		Adamts15	1	Mbd5	5	Sdsl	3	Agt	1
Ntrk2	Bcat1	Zfp809	AK129160		Cbln1	AK146861	P4ha1	AK215526		Adamts17	1	Mast4	5	Sec14l2	3	Agtpbp1	1
Zc3h7a	Tmc4	Kirrel3	Lmo7		Tmem131	DQ703057	Ccdc109a	Hs2st		Adamts20	1	Map2k6	5	Sepp1	3	Agtrap	1
Drctnnb1a	Zim1	Oaf	Ulk4		1700019O17Rik	AK079018	D10Ertd641e	AK217941		Adamtsl2	1	Luzp2	5	Serpina1c	3	AI317237	1
C330043M08Rik	Peg3	AK143856	Tmem16b		Ptger3	Plekhk1	AK085995	Ube2v1		Adar	1	Ltbp4	5	Setd4	3	AI427515	1
Flcn	Clcn4-2	Trim29	Il17rd		Ppm1b	Rhobtb1	Srgn	Igsf9b		Adarb2	1	Lgr5	5	Sftpb	3	Ajap1	1
Mpped2	Rshl1	Dscaml1	Znrf3		Kcnip2	Cdc2a	Cxxc6	Trerf1		Aebp2	1	Lat2	5	Shmt1	3	AK004221	1
Snx8	ClaspL	Cadm1	Palm		DQ284430	Slc16a9	Atoh7	Vegf		Afap1l1	1	Lama4	5	Shroom3	3	AK005363	1
Plekhg3	Zfp180	Alg9	Ssbp3		Ctnna3	Pcbp3	Dnajc12	Erc2		Agrin	1	Kynu	5	Sirt5	3	AK005580	1
ten-m4	Zfp94	Map2k5	AK134652		Wt1	AK153590	AK079018	2810032E02Rik		Ahdc1	1	Ksr2	5	Slc24a6	3	AK005643	1
Rbms3	Kcnn4	AK006167	Slc45a1		DQ546052	1200002N14Rik	mKIAA1380	Dync2h1		AI480653	1	Klhl32	5	Slc25a33	3	AK005653	1
Camk1d	Prx	AA407270	Gria2		DQ551402	AK082467	Arid5b	Cacna2d2		AI646023	1	Kcnt2	5	Slc38a3	3	AK006131	1
Cntn5	Lrfn1	Prtg	Usp13		DQ556070	Nudt4	AK034539	A2bp1		AI851790	1	Kcnq5	5	Slc41a3	3	AK006189	1
Fmnl3	Spred3	Acpl2	Rsu1		DQ556350	Btg1	Cisd1	AY672066		AK002929	1	Kcnk18	5	Slc44a1	3	AK006465	1
Tspan9	Lrfn3	D9Ertd280e	AK137304		Marveld2	Dcn	Upb1	Cacna1c		AK005576	1	Iqcd	5	Slc6a13	3	AK006587	1
vesl-2	Zfp536	Alas1	Eya2		DQ705824	AK019697	Col18a1	Mrps23		AK005635	1	Il3ra	5	smoc2	3	AK006677	1
Znrf3	Klk15	mKIAA4155	Adarb1		DQ716672	E2f7	Icosl	Brca1		AK005643	1	Igsf5	5	Smyd3	3	AK006991	1
Tom40	Fut2	Tgfbr2	AK138907		Fgfr2	Lgr5	EG624845	Yipf2		AK005828	1	Igfbp5	5	Snx10	3	AK007095	1
Cul1	Adamts17	Acaa1b	Ank3		Mdm1	Lyz	Bsg	Map3k7		AK006037	1	Hmgcr	5	Spcs2	3	AK007112	1
Hlcs	Alpk3	Gorasp1	Rnf145		Osbpl8	Hmga2	Fstl3	Usp10		AK006189	1	Hip1	5	Spert	3	AK007162	1
Aldh16a1	Me3	Mki67ip	AK140147		BC057022	Tmem5	Onecut3	Zcchc14		AK006331	1	Hibadh	5	Spock1	3	AK007174	1
Dnm3	P2ry2	Plxdc1	AK140632		Wapal	Usp15	AK005183	Gpr175		AK006725	1	Hdgfl1	5	Sstr2	3	AK007216	1
Ndrg1	Nlrp10	BC050213	AK140896		Mreg	AI851790	AK054042	mKIAA1896		AK006738	1	Gucy2e	5	St3gal5	3	AK007305	1
Dcbld2	Giyd2	AK157659	40795		Barhl2	Emid1	Ascl1	Sec23ip		AK006923	1	Grg4	5	Suclg2	3	AK007854	1
Mcart1	Tmem28	Serpina1c	D15Wsu169e		Kbtbd8	Igfbp1	Nr1h4	BC026601		AK006961	1	Gpr19	5	Sumf1	3	AK008222	1
Degs1	4930444A02Rik	Rnf144b	Ank3		Ecm2	Tns3	Slc17a8	Bean		AK006991	1	Gpbp1	5	Susd4	3	AK008586	1
BC057893	6430573F11Rik	Auh	Zfp469		Gm414	Papolg	AK082467	Prip		AK007030	1	Gm944	5	Synpo	3	AK009351	1
Ssh1	Fath	AK035211	Ralgds		Adamts15	Ccdc85a	Nedd1	mKIAA1124		AK007112	1	Gli2	5	Taok3	3	AK009368	1
Entpd7	Neil3	Zcrb1	1110018J23Rik		Ankrd28	Gnb2l1	Wdr51b	Uvrag		AK007214	1	Ggtla1	5	Tat	3	AK012661	1
Rac1	1700011L22Rik	C4b	Tmem112		OTTMUSG00000016790	Il13	Kitl	Zwint		AK007845	1	Gadl1	5	Tbc1d16	3	AK012713	1
Htra1	Bcmo1	Hhex	Gpr107		Maf	Abca9	Ptprq	Brms1l		AK007854	1	Fstl5	5	Tctn2	3	AK014147	1
Anxa6	4933407C03Rik	Endog	Kcnab2		1200015F23Rik	Kcnj2	Osbpl8	Znf326		AK008856	1	Frrs1	5	Tectb	3	AK014513	1
Hmga1	4632417N05Rik	AK177731	Prox1		AA407270	Rpl38	Krr1	Lrrtm4		AK008969	1	Frmd6	5	Tln2	3	AK014626	1
6530404N21Rik	Kcng4	Tmem50a	AK144886		Lrrc55	St6galnac2	Ccdc131	mKIAA4191		AK009335	1	Foxl1	5	Tmcc3	3	AK014786	1
Xdh	BC025816	Suclg2	6030446N20Rik		Gpr101	40795	AK006831	E2f6		AK009368	1	Flg	5	Tnfaip8l1	3	AK015092	1
chat	Car5a	Pex26	Tcf3		Gm833	AK035515	Gm239	Eif4g3		AK009788	1	Figla	5	Tnfrsf19	3	AK015336	1
Tspan33	Sult5a1	Ptpn6	Smarcc2		Atxn7l1	Mycn	Cpsf6	BC039791		AK010122	1	Fgf5	5	Tnrc5	3	AK015395	1
Golga4	Olfm2	Irf2bp1	Ptpn11		Rnf207	4933425L03Rik	AK076673	4930473A06Rik		AK011682	1	Fert2	5	Trim25	3	AK015423	1
2700049A03Rik	Rgl3	mKIAA1971	Rimbp2		Bex6	2010109K11Rik	Hmga2	BC034076		AK012841	1	Ferd3l	5	Tshz2	3	AK015475	1
BC004022	Opcml	Ccnd1	Phf15		EG545253	Foxg1	4930505D03Rik	BC040754		AK013564	1	Fbxo17	5	Ttc7	3	AK015566	1
Krba1	Nlrx1	AK090261	Lphn1		Rufy4	Coch	Srgap1	Ubl3		AK013712	1	Fbxo11	5	Ttr	3	AK015682	1
Cabc1	Scaper	AK016841	Kalrn		Adar	Arhgap5	Usp15	Calr4		AK014460	1	Fbxl17	5	Txndc5	3	AK015818	1
Capzb	Slc24a1	1300018I17Rik	Centg2		Sertad2	Akap6	Xrcc6bp1	BC044880		AK014683	1	Etv1	5	Upb1	3	AK015900	1
Lrrc61	Unc13c	BC033915	Plxnb2		Eif4e2	1110002B05Rik	B4galnt1	Wnk2		AK014969	1	Erg	5	Upp2	3	AK015944	1
mKIAA0763	2310046A06Rik	Hyal2	Ank1		Rrn3	Brms1l	Hsd17b6	Ptprn2		AK015105	1	Erbb4	5	Usp10	3	AK016100	1
Ttll11	Impg1	Sox17	Dnajc6		1700015E13Rik	Wdr20b	Gls2	Tcerg1l		AK015203	1	Epm2a	5	Usp12	3	AK016251	1
Cutl1	Adamts7	Sgk3	St18		Lhx3	AK039829	AK047988	Narg1l		AK015208	1	Emid2	5	Vti1a	3	AK016383	1
Myo7a	Pcolce2	Cnnm4	Nrxn2		Pitx2	Dbpht2	Sec14l4	BC048761		AK015227	1	Edg3	5	Wdr91	3	AK016549	1
P7	Pccb	Zap70	Ddef1		Ryk	AK020496	Sec14l2	BC048766		AK015316	1	E130009J12Rik	5	Wwox	3	AK018156	1
Pcdh7	AK049838	A230074B11Rik	Pde10a		ENSMUSG00000053178	4933426M11Rik	4930562D19Rik	BC049717		AK015336	1	Dyrk2	5	Xbp1	3	AK018911	1
Rreb1	AK132299	AK084284	Lgmn		4831426I19Rik	Snw1	Znrf3	1700011F03Rik		AK015392	1	DQ687660	5	Zbtb40	3	AK018940	1
Abhd12	Osbpl10	Stk16	Stard13		Rpl38	Nrxn3	Ankrd48	Mycn		AK015444	1	DQ557218	5	Zfp462	3	AK019125	1
Klc4	Gadl1	APG16L	Mgll		Mon1b	Gsc	Ddx56	Adcy1		AK015475	1	Dnase2b	5	Znf710	3	AK019563	1
Slc6a18	Akap14	Dgkd	Nfib		Shroom3	Dlk1	Adcy1	Prmt3		AK015826	1	Dnahc8	5	40800	2	AK019672	1
Cs1	Igfbp5	Ugt1a6a	D14Ertd581e		Dysf	mKIAA0044	Hus1	Rph3a		AK015937	1	Dlgap3	5	0610030E20Rik	2	AK019723	1
Map2k2	Sash1	Tmem185b	Klf7		Rbpj	2010107E04Rik	Ddc	Lrtm1		AK016283	1	Dlgap1	5	1110049F12Rik	2	AK019731	1
Sbf2	Stard3	AK051055	Ppm1h		Dock9	Igha	AK013680	Lrrc28		AK016284	1	Dleu7	5	1200004M23Rik	2	AK019818	1
Cyp2d22	Scn9a	BC034090	Rin2		A1bg	Rapgef5	Slc1a4	BC052551		AK016332	1	Diap2	5	1300002K09Rik	2	AK020043	1
Tada3l	Eif2ak4	Sec16b	Spata13		Grik3	AK006031	Bcl11a	Slc1a7		AK016386	1	Dclk3	5	1300012G16Rik	2	AK020496	1
Slc30a9	AK082432	Dnm3	Atp8a1		Cep63	5033411D12Rik	2510006C20Rik	Eef2k		AK016496	1	D3Ertd300e	5	1300018I17Rik	2	AK020588	1
Rnf144b	Kcnb1	Kifap3	Lmna		Oxtr	AK029768	Ccdc99	6720467C03Rik		AK016914	1	D19Ertd652e	5	1600002O04Rik	2	AK020680	1
St3gal6	2310008M10Rik	Sacy	Rara		Gpr116	AK042843	Gabrb2	Rps6kc1		AK017006	1	Cybrd1	5	1700007B13Rik	2	AK020767	1
2310004N24Rik	Akna	Creg1	Fbxl17		Tsc22d2	Jarid2	Fabp6	Cacna1d		AK017048	1	Ctnnd1	5	1700020C11Rik	2	AK021075	1
Chpt1	Hsd17b11	Fmo9	Mier2		Tln2	AK039480	Ebf1	BC059892		AK017086	1	Cpa6	5	1700094C09Rik	2	AK028130	1
RP23-451A6.3	Tpte2	Crp	C2ta		1810013L24Rik	DQ715521	AK170868	Caskin1		AK017337	1	Col12a1	5	1810013L24Rik	2	AK028782	1
Als2	Rpn1	Epb4.1l2	mKIAA0281		Fndc1	Ror2	Cnot6	Rbm5		AK018156	1	Clcn4-2	5	1810073H04Rik	2	AK029404	1
Slc39a11	BC053749	AK008073	Ptpn14		Fbln2	Gkap1	Phf15	4930471G03Rik		AK018891	1	Cdh19	5	2010011I20Rik	2	AK029503	1
BC013481	D8Ertd82e	L3mbtl3	Fyn		Ppp2r5c	Ntrk2	Gdf9	Prdm10		AK019036	1	Cdh13	5	2010305A19Rik	2	AK029692	1
Ankrd46	Sin3b	Ppa1	Vac14		Pars2	NR_002860	RP23-188H3.7	Ulk4		AK019332	1	Cbx7	5	2210009G21Rik	2	AK029958	1
Srebf2	1190005I06Rik	Aifm2	Stat1		Tle3	Ccrk	AK039036	Tiam1		AK019585	1	Car8	5	2310031A18Rik	2	AK032654	1
Dph3	1700014N06Rik	Hk1	Etv6		Dusp5	mKIAA1376	AK007998	Vdu1		AK019643	1	Capza3	5	2810459M11Rik	2	AK033000	1
Ahdc1	Prim2	Rhobtb1	A930034L06Rik		Gm572	Tmem161b	Hand1	Cdca2		AK019657	1	Cacna1i	5	2900057K09Rik	2	AK033649	1
Kiaa0819	2010300C02Rik	Upb1	4632425D07Rik		Gm693	Aggf1	Mrpl22	Rpl34		AK019672	1	C230029F24Rik	5	3110004L20Rik	2	AK034027	1
Trip11	Kcne4	Ddt	Hhatl		LOC100041724	AK050283	2210407C18Rik	Mical3		AK019711	1	C1d	5	3110049J23Rik	2	AK035379	1
Ttc28	A830043J08Rik	Pcsk4	Col27a1		Aqp1	AK172672	Zfp179	Trio		AK019731	1	C030003D03Rik	5	3300001P08Rik	2	AK035738	1
Kctd9	1700019O17Rik	Mbd3	Tns3		Barx1	Depdc1b	Adora2b	Nlgn1		AK020588	1	Btg3	5	4632417N05Rik	2	AK035994	1
Llgl1	Slco6c1	Gna11	oasl10		Cenpc1	Plk2	BC025076	St3gal1		AK020768	1	Brms1l	5	4931406I20Rik	2	AK036307	1
Dab1	Avpr1b	4930547N16Rik	Fgf9		Cetn3	AK134426	Pmp22	4631405J19Rik		AK020795	1	Bin1	5	4933403F05Rik	2	AK036396	1
Fez2	AK147021	Tmcc3	Pde2a		Crhr1	Gzmk	Hs3st3b1	BC100534		AK021093	1	BC053749	5	4933407H18Rik	2	AK036614	1
BC057135	B020018G12Rik	AK006570	Zfyve27		Eif4e	Esm1	Cox10	Htr1d		AK021368	1	BC038822	5	4933417O08Rik	2	AK038386	1
Itga6	Akap12	Gls2	Ecm1		Enc1	Hspb3	Hs3st3a1	Rere		AK028077	1	Baz2b	5	4933426M11Rik	2	AK038767	1
Ankrd15	Plekhg1	Apof	Arid1b		Esx1	Bcng-1	AU040829	A030009A09Rik		AK028711	1	B3galnt2	5	4933428G20Rik	2	AK038827	1
BC059853	Taar4	Mmp19	Ece1		Fgf18	Plekhc1	AK042647	Btbd2		AK029587	1	Atg4c	5	5033413D22Rik	2	AK038992	1
Ablim3	Taar5	Sec14l4	Mtap1a		Fshb	Bmp4	AK033426	Mtif3		AK029663	1	Armc3	5	5330421F07Rik	2	AK039053	1
Zzz3	Slc22a16	Xbp1	Rab3c		Fxr1h	Ttc5	Gm879	D630023B12Rik		AK030453	1	Arih1	5	5730409G15Rik	2	AK039090	1
Usp29	Ctnna3	Adcy1	Sdk2		Gap43	E130112L23Rik	Ybx2	Rasl11a		AK031770	1	Arid5a	5	5730437N04Rik	2	AK039113	1
BC063263	AK046981	AK144295	1110061O04Rik		Gas1	AK076852	AK039373	Spata18		AK031871	1	Arhgap24	5	5930403L14Rik	2	AK039125	1
Coasy	Bicc1	Sh3pxd2b	myo 10		Gcm1	6330409N04Rik	Rabep1	1810041L15Rik		AK032118	1	Apod	5	6030458C11Rik	2	AK039238	1
Kcnma1	AK039487	Med7	Srgap2		Gnaq	GFRalpha2	Aipl1	2900075B16Rik		AK035466	1	Ankrd7	5	9130404D14Rik	2	AK039269	1
mKIAA1747	Col6a1	Timd2	Rbms3		Ibsp	mKIAA0629	Carkl	Bank1		AK035687	1	Ank2	5	9830102E05Rik	2	AK039362	1
mKIAA4026	mFLJ00277	3010026O09Rik	Kcnc1		Ifng	Olfm4	Garnl4	Wdr72		AK035761	1	Amigo2	5	A2bp1	2	AK039419	1
D6Wsu176e	NR_000040	Csf2	Cadps2		Lrig1	Diap3	Mnt	CS444466		AK036396	1	Aldh1a3	5	A730017C20Rik	2	AK039498	1
Eml4	Myf5	AA536749	Uap1		Irf2	Pcdh20	Prpf8	Mc2r		AK037056	1	Alcam	5	AA407270	2	AK039607	1
mKIAA1337	Zfp2	Srebf1	Slc7a14		Kcnn4	AK014964	Myo18a	DQ072390		AK037512	1	Akap7	5	Aatf	2	AK039624	1
AU042671	Ankrd13b	AK041628	mKIAA1672		Ldhb	AK051771	Slc46a1	DQ279480		AK039608	1	Akap12	5	Abcc12	2	AK039720	1
Grm4	Myo18a	BC064116	Rpap1		Tacstd1	Spry2	AK078931	Ablim2		AK039634	1	AK195428	5	Abcc4	2	AK040104	1
Med13l	AK020764	Centb1	Hspa12a		Smad4	Slitrk5	Myo1d	Ksr2		AK039635	1	AK191823	5	Abcc6	2	AK041762	1
Syne2	Mmd	Asgr2	Slc12a8		Ascl1	Gpc5	1700071K01Rik	DQ556070		AK039829	1	AK186650	5	Ablim2	2	AK041976	1
Pou6f1	Kif2b	Serpinf1	Astn1		Nkx2-5	Gpc6	Ccl3	DQ563521		AK040640	1	AK144664	5	Acaa1b	2	AK042514	1
Afap1l1	Gjc1	Serpinf2	mKIAA0338		Nnt	Abcc4	1100001G20Rik	DQ564750		AK040671	1	AK143760	5	Acacb	2	AK042843	1
Mapk4	4933422H20Rik	Vps53	Pik3c2b		Plau	AK019031	AK018772	DQ686437		AK040674	1	AK139687	5	Acox1	2	AK042904	1
Magi1	Dysfip1	Coro6	AK166044		Ppargc1a	Sepp1	AK085477	DQ694814		AK040960	1	AK136034	5	Acpl2	2	AK042944	1
Tacr1	4930417G10Rik	Unc119	Entpd7		Pten	Ghr	AK053124	DQ716012		AK041328	1	AK132076	5	Actb	2	AK042948	1
Pcnx	Pdia6	Akap1	Ssh3		Ptgs1	Slc1a3	AK085522	Fgfr2		AK041628	1	AK122525	5	Actrt2	2	AK043153	1
Elovl6	Prps1l1	Trim25	Dusp14		Ptp4a2	Cdh6	Med13	Tcte3		AK042016	1	AK088204	5	Adamts17	2	AK043303	1
Atxn7l4	Cox8c	Hlf	mKIAA0833		Rad50	AK084059	Rnf43	Kitl		AK043460	1	AK076916	5	Adcy1	2	AK043460	1
1700029J07Rik	Ankrd9	Phospho1	Padi2		Scd2	Atp6v1c1	AK021127	Il12a		AK043531	1	AK076709	5	Adh4	2	AK043531	1
Trpv3	EG382639	Sp2	Pxk		Scg2	Trps1	Akap1	Ghrhr		AK043844	1	AK052414	5	Adora1	2	AK043659	1
2600001A11Rik	Calml3	4933428G20Rik	Hmga1		Selenbp1	9130401M01Rik	Pctp	Zfp366		AK043964	1	AK046740	5	Adrb1	2	AK043747	1
Pde10a	Ntrk2	Arhgap27	Gpr180		St6galnac2	D15Ertd621e	JSAP2	Rtp1		AK045700	1	AK046351	5	Aff1	2	AK043780	1
Plekhk1	BC089513	Tex2	Dgkz		Sox4	AK035211	Tob1	Gm347		AK046742	1	AK045825	5	Aff3	2	AK043919	1
Tdrd9	4732495G21Rik	Apoh	Snx7		Serpina3n	AK041614	A430060F13Rik	Phactr1		AK048280	1	AK044689	5	Afp	2	AK044422	1
Rnf190	Ddx4	Abca8a	Cblb		Tle3	AK040104	AK139229	Whrn		AK048710	1	AK044414	5	Agpat3	2	AK044449	1
4632411B12Rik	Oxsm	Abca6	Anpep		Tll1	Adcy8	BC002310	Gm52		AK048739	1	AK041437	5	Agps	2	AK044789	1
Pax2	BC034735	AK157980	6430548M08Rik		Ube2e1	Ly6e	Skap1	AW146299		AK048775	1	AK040960	5	Agt	2	AK044901	1
Pcsk5	9230112D13Rik	Slc16a5	Lhfp		Zfpm1	Rbm9	Npepps	EG434280		AK049264	1	AK039809	5	Agtr1a	2	AK045700	1
Ptprs	Cebpe	Mrps7	Slc43a2		Slc30a1	Abcd2	4933428G20Rik	2310022M17Rik		AK050091	1	AK036466	5	Ahcy	2	AK046920	1
Epb4.1l4a	Rnf17	Fbf1	Pfas		Abl1	AK084200	Eif1	OTTMUSG00000016790		AK050558	1	AK021231	5	Ahdc1	2	AK047978	1
Pcsk6	Trim13	Acox1	Vps13d		Chrne	BC038822	Arl4d	Btbd3		AK050866	1	AK020236	5	Ahsg	2	AK048592	1
Kcnb1	Slc25a37	2310004N24Rik	Rap1gap		Aebp2	Pkp2	Dhx8	Prickle1		AK051160	1	AK019711	5	Aifm2	2	AK048775	1
CaV1.2-a	Piwil2	Cdk3	mKIAA0545		Alox12b	Igf2bp2	Rundc3a	Gm114		AK052590	1	AK019630	5	AK003327	2	AK048995	1
Mll1	Rims2	Mgat5b	Brsk2		Apob	Opa1	Dcakd	Gm239		AK052792	1	AK017106	5	AK006138	2	AK049068	1
Cyp2c44	BC048519	40795	Tmem123		Atp1b1	AK144120	DQ726408	Abcc4		AK053124	1	AK016071	5	AK006167	2	AK049838	1
Gpr126	BC030396	Afmid	Foxn3		Cct6b	Senp5	Nsf	A230067G21Rik		AK053224	1	AK015395	5	AK006189	2	AK050844	1
Git1	Hemt1	Birc5	Elmo1		Cdh5	Rnf168	Crhr1	Heca		AK053772	1	AK015208	5	AK006934	2	AK050940	1
BC057022	BC100417	AK149260	Csmd2		Col4a1	Ubxd7	Ern1	4922505E12Rik		AK053994	1	AK010195	5	AK007416	2	AK051887	1
Syne2	Pla2g6	Csnk1d	Centg1		Dhfr	Tfrc	AK146139	1700071K01Rik		AK076700	1	AK006474	5	AK007854	2	AK052627	1
Best3	1700029P11Rik	Atxn7l1	Dcdc2		Efna5	Pvrl3	Helz	Trpm3		AK076771	1	AK002748	5	AK008073	2	AK053224	1
Mxi1	Mov10l1	Nin	Tmem132b		Fgf1	Dppa4	BC029169	Nfatc2		AK076840	1	Adamts20	5	AK009335	2	AK053505	1
Ankrd6	Olfr234	Gpr135	Adamts2		Gata6	Senp7	AK006264	Mex3c		AK076842	1	Abcc4	5	AK014098	2	AK053602	1
0610025P10Rik	1700030F18Rik	Trmt5	Chd4		Emb	Col8a1	Map2k6	Adora1		AK076847	1	9030205A07Rik	5	AK015174	2	AK054042	1
Grhl3	Krt4	AK085818	Phactr4		Hand2	Olfr178	AK015526	Angptl7		AK077135	1	6430502M16Rik	5	AK015203	2	AK076655	1
EG434197	Fam112b	Plekhg3	Gli2		Id2	Chmp2b	AK011682	4831426I19Rik		AK077350	1	4933415F23Rik	5	AK015475	2	AK076665	1
Ddi2	Mgrn1	Prox2	Glis3		Idh1	AK029643	AK031204	1600002O04Rik		AK077811	1	4932702K14Rik	5	AK015628	2	AK076673	1
Anks6	Rpl39l	Esrrb	Fkbp8		Sspn	Cadm2	Cog1	Bahd1		AK078566	1	4930579E17Rik	5	AK016284	2	AK076734	1
Dffa	Pigz	AK015566	Cacna2d2		Lig3	Speer2	AK006331	Tmpo		AK078931	1	4930517K23Rik	5	AK016661	2	AK076739	1
Serac1	Cldn17	3300002A11Rik	AY512909		Anxa1	AK033170	Cd300a	6330500D04Rik		AK079222	1	4732473B16Rik	5	AK016841	2	AK076794	1
3110004L20Rik	AK049769	Foxn3	Cacna1c		Mal	AK019818	Acox1	Ret		AK079818	1	4632417N05Rik	5	AK018946	2	AK076831	1
Spryd3	Ldhal6b	Serpina10	GLUTX1		Grap2	AK087725	Tha1	Rbpj		AK080222	1	2810474O19Rik	5	AK018968	2	AK076979	1
BC013712	Prss21	Serpina6	Mod1		Snf1lk	D16Ertd472e	Socs3	A1bg		AK080422	1	1810054D07Rik	5	AK019124	2	AK077163	1
Abcc4	1700029I08Rik	Serpina11	Tspan15		Pax2	AK013372	Pscd1	1700009N14Rik		AK080684	1	1700129C05Rik	5	AK019620	2	AK078896	1
Sec31b	Zbtb12	Serpina12	Lepr		Pck1	Olig1	AK149260	Gli2		AK081271	1	1700009N14Rik	5	AK019836	2	AK079012	1
Gm1604	Dlgap1	Crip2	Fhit		Pik3c2g	Dscr3	Actg1	Ercc6		AK082086	1	1200002N14Rik	5	AK019889	2	AK079188	1
Ccdc102a	AK082862	Slc17a1	Psen1		Pla2g5	Erg	Slc25a10	Kif14		AK082731	1	1110012J17Rik	5	AK020502	2	AK079670	1
Perld1	BC027072	Nqo2	2010004A03Rik		Psap	AK040426	Sectm1a	Dsel		AK084679	1	40795	5	AK021192	2	AK079929	1
1190002A17Rik	Yipf4	Ripk1	Pfkfb2		Ptpn11	EG627132	AK135813	Chd7		AK084778	1	Zfpm2	4	AK021342	2	AK081879	1
Adamts17	Fshr	3110004L20Rik	Pip5k1c		Ptpn3	Snf1lk	AK190704	Rgs3		AK085300	1	Zfp804a	4	AK031221	2	AK082264	1
1700120B06Rik	Osbpl1a	AK008767	Foxo3a		Ptpru	H2-Q2	AK084679	Zfp664		AK085420	1	Zfp672	4	AK033051	2	AK082503	1
1810015C04Rik	Pcdha1	AK044426	Sfrs15		Shcbp1	Ubr2	Kcns3	Tle3		AK085438	1	Zfp608	4	AK033147	2	AK082869	1
Centg2	Pcdh1	Phf2	BC025054		St6galnac3	Tbc1d5	D12Ertd553e	Dusp5		AK085459	1	Zfp42	4	AK035211	2	AK084074	1
Cml3	Gykl1	Eif4e1b	Slc7a10		Tbx5	AK047946	AK015413	Krtap17-1		AK085477	1	Zfp358	4	AK035444	2	AK084170	1
Nell1	Slc14a1	F12	Slc39a5		Txn1	Fbxl17	AK045700	Alx4		AK085652	1	Zfp169	4	AK036289	2	AK085316	1
Kif5a	Tcirg1	BC027057	Lmo6		Dctn6	AK050349	Lpin1	Bach2		AK085818	1	Zbtb7a	4	AK037512	2	AK085341	1
Fars2	Rin1	Fbp1	Col13a1		Hs2st1	E130009J12Rik	Pdia6	Cbx3		AK085995	1	Xrcc2	4	AK038827	2	AK085342	1
4631422O05Rik	Arl2	Slc12a7	Arhgap22		Odz4	DQ547751	Itgb1bp1	Cidea		AK086149	1	Xkr6	4	AK039373	2	AK085420	1
Morc3	Cstf2t	Zfyve16	Syne2		Psma6	mKIAA4044	Taf1b	Crhr1		AK086959	1	Xkr4	4	AK039417	2	AK085459	1
1810012P15Rik	Ppp1r3c	Erbb2ip	Tspan5		Ngfb	Dlgap1	Mboat2	Edn2		AK086971	1	Wwc2	4	AK039419	2	AK085522	1
Bcl11b	Pde6c	Gzmk	Cdh4		Klf10	Lbh	Tyki	Epha5		AK087624	1	Wnt9b	4	AK039589	2	AK085792	1
Cdc14a	Pdzd7	Acox2	Dpp6		Akr1c12	Lycat	AK163447	Galc		AK089123	1	Wnt7b	4	AK039734	2	AK086273	1
Ankfn1	AK043996	AK041570	Jazf1		Abcc5	AK082440	1110015M06Rik	Gap43		AK089373	1	Wdr41	4	AK040202	2	AK086290	1
Srgap1	Kcnk18	Adk	Dbc1		Barx2	Arl6ip2	Tmem18	Gdf1		AK122525	1	Wdr20b	4	AK040224	2	AK086741	1
Xpot	AK139587	Itih3	Atf7ip		Hs6st1	AK020236	Atxn7l1	Gpr65		AK131776	1	VR3	4	AK044414	2	AK086971	1
Taf4a	Psd4	Itih1	Trrap		Sdcbp	mKIAA0578	Hdac9	Grin2a		AK131834	1	Vps36	4	AK044426	2	AK087691	1
4930500O09Rik	Sohlh1	Sftpd	Ntrk2		Rgl1	Mkx	AK086288	Foxg1		AK132084	1	Vdac1	4	AK044689	2	AK088579	1
4933407H18Rik	Sh2d3c	C130032J12Rik	Smarcc1		40795	Fzd8	Nova1	Hlx		AK132190	1	Vangl2	4	AK044786	2	AK088937	1
Gabbr2	AK144626	Rnase6	Dnajc1		Phc2	DSC3	Prkcm	Hnf4a		AK133010	1	V2r3	4	AK045483	2	AK090251	1
Kif13b	Stk39	TCR-alpha chain	Dock9		Samhd1	Mapre2	6030408C04Rik	Irx3		AK133014	1	Unc13c	4	AK050164	2	Ak1	1
Klhdc5	Cyct	Wdr23	Vav2		Rplp1	AK076984	Arhgap5	Itga6		AK133987	1	Ubqln3	4	AK050735	2	AK129160	1
Tln2	Ttn	Cideb	Sec14l1		Olfm1	Pik3c3	Egln3	Kcnj2		AK134490	1	Txlnb	4	AK051055	2	AK131742	1
Zkscan2	Pde1a	Trim13	Sez6l		Gas6	Lmnb1	1110002B05Rik	Kif1b		AK135471	1	Tube1	4	AK052569	2	AK132134	1
Rimbp2	Alkbh3	Zfp395	Ppl		Tbc1d1	Slc12a2	Mbip	Ldhb		AK135894	1	Tuba3b	4	AK053334	2	AK133024	1
Amotl1	BC057381	Chrna2	Dlgap3		Letm1	S60130	AK053157	Tm4sf1		AK136047	1	Ttll1	4	AK053772	2	AK133333	1
Chd7	Chrm5	AK015336	Tubgcp6		B4galt6	Mc4r	Ctage5	Man1a		AK136128	1	Trim58	4	AK054515	2	AK134426	1
Sh3d19	1600015H20Rik	Rcbtb2	2310016F22Rik		Slc2a5	Gm672	Arf6	Odf1		AK137033	1	Tpte2	4	AK076555	2	AK134652	1
Pphln1	AU015228	BC100491	Dock9		Pdcd10	Corl2	AK039829	Pdgfa		AK137923	1	Top1	4	AK076840	2	AK134749	1
Sdcbp	Wfdc15a	Dnahc5	Ankrd15		Cdh17	Sall3	Frmd6	Pip4k2a		AK138161	1	Tnnc2	4	AK077135	2	AK135715	1
Duox1	Tnnc2	Dap	Kcp		Vapb	AK007073	Rtn1	Plxna2		AK138348	1	Tnfrsf13b	4	AK078795	2	AK135726	1
Rp23-45p4.1	AK006474	Dpys	Plekha7		Tas2r119	Cbln2	Dhrs7	Rad51l1		AK138592	1	Tmem79	4	AK080057	2	AK136034	1
Otof	Ctcfl	Gm628	Tec		Sez6	Gda	Ppm1a	Sag		AK138811	1	Tmem56	4	AK080484	2	AK136642	1
Acvr2b	Gnas	Plec1	Ephb2		Fmod	1700028P14Rik	Ppp2r5e	Atxn1		AK138849	1	Tmem53	4	AK082314	2	AK136683	1
Akp2	Sycp2	Oplah	Itsn1		Klf13	Apba1	Nua	Exoc4		AK139772	1	Tmem16h	4	AK085201	2	AK137033	1
Apoa4	AK045614	Adck5	Wnt7b		Pard6b	Slc1a1	AK133227	Shfm1		AK139810	1	Tmem119	4	AK085459	2	AK137304	1
Bmp6	Trpc3	Slc39a4	Stac3		A2bp1	Mlana	Wdr22	Sox11		AK140089	1	Tmcc2	4	AK085818	2	AK138215	1
Cdh2	AK021231	Gpt1	Kif26b		Pvrl3	Mbl2	Exdl2	Tsc22d1		AK142161	1	Tlk2	4	AK086534	2	AK138462	1
Cox5a	Celf3	2210421G13Rik	mKIAA4026		Si	NR_002849	AK018974	Tjp1		AK143758	1	Thoc5	4	AK088204	2	AK138907	1
Slc26a2	Hormad1	Mpst	Tiam2		Syt9	Prkg1	Slc10a1	Tle3		AK143784	1	Tex19	4	AK088911	2	AK139229	1
Ercc1	Ensa	Kcnj4	Myo16		B4galt1	Acta2	Wdr21	Tpst2		AK143902	1	Tdrd7	4	AK088920	2	AK139528	1
Sh3pxd2a	Nr1h5	Cyp2d22	Slc39a3		Clstn2	Hells	Zadh1	Ttc3		AK144563	1	Tdrd3	4	AK088937	2	AK139810	1
Gabrg3	mCLCA1	Nfam1	Zfp532		Ralb	Clim1	1700020O03Rik	Zfp179		AK144886	1	Tcp11	4	AK089123	2	AK140370	1
Gas2	Msh4	Cyb5r3	Magi1		Raly	mKIAA1296	Esrrb	Zfp42		AK145161	1	Tbxas1	4	AK090261	2	AK140583	1
Gnat2	Gng10	Bik	Egflam		Slc5a4b	Hif1an	Sptlc2	Zfpm1		AK145464	1	Tbx15	4	AK131759	2	AK140896	1
Grin2d	Ankrd38	Mpped1	Pla2g4b		Ndnl2	Adra2a	Ston2	Adcy1		AK146150	1	Tbc1d4	4	AK133227	2	AK142431	1
Hes2	Cdc20	Parvg	BC099512		Esm1	Rab11fip2	Ptpn21	Ap3b1		AK146386	1	Tank	4	AK133333	2	AK143160	1
Ppap2a	ASK2	AK006138	BC099526		2410016O06Rik	mKIAA1294	Ccdc88c	Aqp4		AK147993	1	Tanc1	4	AK134426	2	AK143789	1
Il10rb	Padi4	Ecgf1	6330514A18Rik		Sec61b	E130319B15Rik	Slc24a4	Cflar		AK148126	1	Syde1	4	AK135691	2	AK143924	1
Kif5c	Park7	Cpt1b	4631405J19Rik		U2af1	Cugbp2	Asb2	Col6a3		AK149260	1	Sycp1	4	AK138505	2	AK144610	1
Lmo2	Pclo	Arsa	C130050O18Rik		Tomm20	AK076687	Serpina6	Cplx2		AK154427	1	Sult1c1	4	AK139229	2	AK144886	1
Smad6	4931409K22Rik	AK178359	C79267		Pdhb	Commd3	Serpina1e	Dlx3		AK156148	1	Stk31	4	AK139483	2	AK144912	1
Man1a	Pdcl2	2810451A06Rik	Atxn7l4		Bhlhb3	Myo3a	Gsc	Dok2		AK156678	1	Stk22s1	4	AK139687	2	AK145614	1
Mgmt	Asahl	Kcnh3	Htr1d		Actl7b	Zbtb43	4831426I19Rik	Edar		AK158034	1	Stim2	4	AK140089	2	AK146230	1
Mthfd2	Ard1b	Letmd1	1110018H23Rik		Dnajc5b	Stom	Tcl1	Edn1		AK158974	1	Steap4	4	AK141842	2	AK146386	1
Ncoa3	Gk2	Krt18	C030017K20Rik		Mcts2	Lrp1b	Vrk1	En1		AK159017	1	Stac	4	AK143856	2	AK150110	1
Nfyc	Brdt	Adcy9	Tdrd9		Cyb5b	mKIAA0569	AK015208	Fbln1		AK160437	1	Ssr3	4	AK144662	2	AK154635	1
Ctnnd2	Aytl1b	Abat	3110006E14Rik		Acot11	ActR	1600002O04Rik	Fgf12		AK160921	1	Spsb4	4	AK146150	2	AK157218	1
Ntf3	Ccdc60	Gt4-1	Wdr7		2610039C10Rik	AK007819	AK157178	Gsc		AK163121	1	Sppl3	4	AK146230	2	AK157456	1
Ntn1	Iqcd	BC046487	Hipk3		Spesp1	Atp5g3	mKIAA0044	Id2		AK163160	1	Spo11	4	AK149260	2	AK158030	1
Pde9a	Rnf34	Ephb3	Dclk1		Cdca7	AK041976	PP2A B56 gamma 3	Irx2		AK163475	1	Spg20	4	AK149394	2	AK158196	1
Pepd	Rabl5	Hrg	Tmem131		Rpl14	Mtx2	AK076722	Itga4		AK163592	1	Spag16	4	AK149453	2	AK160260	1
Pip4k2a	Muc3	St6gal1	Nwd1		Lyzl1	Sestd1	Ppp1r13b	Jund1		AK164256	1	Sox5	4	AK157659	2	AK160416	1
Prkci	Trfr2	Lpp	Epb4.1l4a		Ppid	Api5	Kif26a	Mafb		AK164829	1	Socs5	4	AK158157	2	AK161948	1
Psen1	Tnrc18	AK050069	Rai1		2310039E09Rik	AK054431	mKIAA0387	Minpp1		AK165443	1	Sntb1	4	AK162519	2	AK162140	1
Ptn	Pon1	Cpn2	Pcsk6		Mcoln2	Slc24a5	Larp5	Snf1lk		AK165817	1	Snrpf	4	AK163447	2	AK162833	1
Ptprg	Kcnd2	Bdh1	Grb2		Syf2	Chmp4b	DQ279480	Pde4d		AK167957	1	Sncaip	4	AK169507	2	AK162930	1
Rai1	Stra8	Tnk2	Kcnk10		Hmgb4	Top1	AK080010	Pou3f1		AK177749	1	Slco3a1	4	AK177731	2	AK163447	1
Rit2	D630002J15Rik	Rpl35a	Pfkfb4		Ovca2	AK082432	5033411D12Rik	Prkg1		AK180240	1	Slc7a15	4	AK205032	2	AK164829	1
Shc3	mKIAA1680	AK044449	mKIAA0703		Mlstd2	Nfatc2	Gpx5	Rxra		AK182874	1	Slc7a11	4	Akap1	2	AK164976	1
St3gal3	4930544G11Rik	Sema5b	Mbp		5730557B15Rik	Tshz2	Zkscan3	Sel1l		AK188320	1	Slc7a1	4	Akap9	2	AK166044	1
Slc22a1	Olfr214	Igsf11	2510009E07Rik		Dmrtc2	BC042727	Btn2a2	Slc2a1		AK199184	1	Slc39a11	4	Alas1	2	AK169507	1
Spnb2	4632433K11Rik	Mrap	Limch1		Senp8	Pfdn4	Hist1h1c	Tbx5		AK202794	1	Slc38a1	4	Alb	2	AK170868	1
Tbxa2r	Clcn4-2	4931408A02Rik	8430427H17Rik		Ubiad1	BC049717	AK139092	Gadd45g		AK203140	1	Slc30a10	4	Alcam	2	AK192827	1
Tead1	Zbtb45	mKIAA1019	2610507B11Rik		Cic	AK006474	AK020095	Osr1		AK205379	1	Slc2a9	4	Aldh2	2	AK200207	1
Tecta	mKIAA0134	AK019036	Adamts7		Ddx54	Bmp7	AK012007	Rngtt		AK206655	1	Slc24a5	4	Aldh4a1	2	AK205829	1
Vdr	Tex101	mKIAA0348	Obscn		Cnn3	Nlgn1	Sox4	Spry2		AK214332	1	Slc24a1	4	Alg9	2	AK209885	1
Ak3l1	Dmrtc2	Plg	Brsk1		Anks4b	Pdzd6	EG432743	Map3k4		AK216819	1	Slc1a5	4	alk	2	AK215526	1
Akap2	Lipe	Igf2r	Inadl		Slc16a10	AK021231	AK137190	Fshr		AK219638	1	Slc1a3	4	Anapc1	2	AK217941	1
Ap3s2	Fbxo17	smoc2	Daam2		Pdia5	Pcdh18	Foxc1	Gfpt2		AK220484	1	Sin3b	4	Ankrd27	2	Akp2	1
Nr2f2	Map4k1	Cldn6	Npcd		1700081D17Rik	AK087699	Gmds	Gzmb		Ak3l1	1	Siah1a	4	Ankrd28	2	Aldh1a3	1
Cacna1e	Hspb6	Igfals	Gm323		Nebl	Ube2v1	BC070417	Lrpap1		Akap2	1	Shcbp1	4	Aox1	2	Alkbh3	1
Camk4	4930479M11Rik	Nudt3	Gm467		Snx19	Veph1	3110004L20Rik	Pla2g7		Akap6	1	Sh3tc2	4	Ap1gbp1	2	alpha1B	1
Chat	AK219239	Fgd2	Zfp488		8430415E04Rik	Il12a	AK155516	Golga5		Akp2	1	Sgce	4	Apba1	2	Alpk3	1
Col4a2	Tulp2	Ubash3a	Tyw1		Bcdin3d	Fstl5	Muted	Tcf20		Akr1c12	1	Setbp1	4	Apba2	2	Alx4	1
Copa	Kcnj11	C4a	Adarb1		Ttll10	Rapgef2	AK029768	Plcl2		Akr7a5	1	Serpine2	4	Apoa1	2	Amotl1	1
Dapk2	Rps17	Apom	Adcyap1r1		Pfn3	BC048678	Tcfap2a	Axin2		Akt1	1	Sema6a	4	Apoc1	2	Anapc11	1
Dyrk1b	Prss23	BC025190	Sufu		1600029D21Rik	Lce1a1	AK082625	Neu2		Aldh16a1	1	Sema5b	4	Apoc3	2	Angel1	1
Edar	Olfr503	Osf2/Cbfa1	Kcnj6		Mfsd2	Flg	Nedd9	Hunk		Aldh9a1	1	Sel1h	4	Arhgef12	2	Angpt2	1
Fgf1	Trim66	Slc29a1	Nova2		Spcs3	Nhlh2	Gfod1	Ercc4		alk	1	Sdpr	4	Arhgef19	2	Angptl2	1
Gfra1	Zfp764	Slc22a7	Usp32		Pigh	Lrig2	Sirt5	Rab10		Alox12b	1	Sdk1	4	Arid1b	2	Angptl7	1
Gng7	B130050I23Rik	1700001C19Rik	5830416A07Rik		Cstad	Dpyd	AK039634	Comp		Alpk3	1	Scn11a	4	Arid5a	2	Ank	1
Gsr	Ash2l	AK088937	Prr7		Galntl2	Ttll7s	Atxn1	Mtx2		Als2	1	Scml2	4	Arid5b	2	Ank1	1
Igf2r	4921537P18Rik	S3-12	Cblb		Aacs	AK081104	Gm1574	Blcap		Ambn	1	Sbk1	4	Asgr1	2	Ankrd13b	1
Itpr1	BC035537	Tnfsf14	5031439G07Rik		Igsf6	Gipc2	Kif13a	Olig1		Amotl1	1	SASH1	4	Asgr2	2	Ankrd15	1
Lrrn2	AK029624	Haao	Limk2		Syt13	Rab2	AK165697	Diap2		Ampd2	1	Rxfp2	4	Asns	2	Ankrd23	1
Mafk	AK016128	Ttc7	Atp2b2		D1Pas1	Gdf6	Zfp169	Sh3gl3		Angptl2	1	Rps6ka4	4	Ate1	2	Ankrd52	1
Ncf2	AK019137	2810439F02Rik	Centg2		40794	Plekhf2	Shc3	Rplp1		Ankfn1	1	Ror1	4	Atp1b1	2	Ankrd6	1
Nfatc2	AK015826	AK053505	Rai1		Tac4	Rbm12b	Gadd45g	Cxcl13		Ankrd15	1	Rngtt	4	Atp8b1	2	Anpep	1
Notch2	Ccdc124	Zfp407	Tcf25		Mrpl1	AK136028	AK029587	Tmem131		Ankrd28	1	Rims2	4	Atrn	2	Antxr1	1
Prkce	Abhd8	BC021614	Fnbp1		Ccrk	mKIAA0776	AK035711	Slc22a21		Ankrd46	1	Rhoj	4	Atxn1	2	Antxr2	1
Lgmn	Cmtm2a	Rela	Kctd21		Erc1	Lingo2	Auh	Rybp		Ankrd6	1	Rgs3	4	Atxn10	2	Anx3	1
St14	Cmtm2b	AK172428	Prkcz		Pawr	Zfp462	DQ553546	Nudt3		Anks4b	1	Rerg	4	Atxn7l1	2	Anxa4	1
Pthr1	Dpep3	AK007351	Lin7a		Mta3	Tyrp1	Hrh2	Ngef		Anks6	1	Rbp3	4	AU021838	2	Anxa6	1
Ptprn2	NR_002928	Zp1	1110020G09Rik		Tirap	Nfib	Fgfr4	Pmfbp1		Antxr1	1	Rbm15	4	AU042671	2	Aoah	1
Serpinf1	4930481F22Rik	Aldh1a7	Thsd4		Tshz2	Atg4c	Pitx1	Tgm1		Anxa1	1	Rap2a	4	Auh	2	Ap3b1	1
Sema7a	Pkd1l2	Mbl2	Trim71		Ppap2b	Pafah2	AK043531	G6pc2		Anxa6	1	Rab39	4	Azgp1	2	Ap3d1	1
Ski	Ddi1	Rbp4	Rbpms		Apcdd1	DQ689974	Cxcl14	Klf13		Ap3s2	1	Rab2	4	B230120H23Rik	2	Apc2	1
Slc20a2	Npsr1	Cyp2c29	Slc7a2		Lbr	Oog4	AU042651	Mylc2pl		Apba1	1	Psma6	4	B230342M21Rik	2	apo	1
Smarca4	Olfr982	Lcor	40606		Gltscr2	H6pd	Zcchc6	Dusp10		Apcdd1	1	Psat1	4	Bai2	2	Appl2	1
Spink4	Tex12	Zdhhc16	Slc1a2		Rpn1	Rere	2010111I01Rik	Perp		apo	1	Prkce	4	Banp	2	Aqp4	1
Stxbp4	Arid3b	Avpi1	Bcl11b		Mat2b	AK131834	AK076966	Irx6		Apoa4	1	Prim2	4	BC013481	2	Arhgap22	1
Tgfbr3	DQ685325	4933417O08Rik	Wfdc8		Gpr37l1	Sema3e	Slc12a7	Cndp2		Apob	1	Ppp6c	4	BC017612	2	Arhgap26	1
Map2k5	Rnf7	Abcc2	Dennd4c		Syt17	Msx1	BC012278	Grina		Apobec2	1	Ppp1r12a	4	BC021523	2	Arhgef17	1
Med24	1700080E11Rik	Dnmbp	Pde11a		Rspo1	Stim2	AK018847	Eif4e2		Aqp1	1	Ppef2	4	BC024582	2	Armc2	1
Trpc7	Glb1	Sema4g	Pdzd2		Pou4f2	Commd8	AK138291	Ranbp5		Arfgap3	1	Ppap2b	4	BC025885	2	Armc4	1
Cd4	AK019838	Pdcd4	Lycat		Vasn	AK079675	Gpr98	Chst1		Arhgap22	1	Pnpla6	4	BC029169	2	As3mt	1
Muc1	Rhox6	Gpam	Lct		Rab3il1	AK018948	Edil3	Ryr2		Arhgap24	1	Pmfbp1	4	BC031353	2	Asb2	1
Ppp1cc	1700080O16Rik	Habp2	Lmtk2		Ube2e2	Hopx	AK162063	Sec61b		Arhgap25	1	Plcl1	4	BC034735	2	Asb9	1
Sema4d	Zfp36l3	Tdrd1	Gpr161		Ppp2r5a	Spink2	Serinc5	Ndufa10		Arhgap26	1	Piwil1	4	BC038155	2	Asprv1	1
X99384	Tex11	AK019620	Kcnq4		BC021611	AK006071	Lhfpl2	Sostdc1		Arhgef10	1	Pgk2	4	BC044868	2	Astn1	1
Dbnl	Trap1a	Pnliprp1	Frmpd1		Pim3	Hnrpd	Scamp1	Smpx		Arhgef10l	1	Peli2	4	BC046508	2	Atf5	1
Hk2	Amot	Mcm10	Dgki		Setd4	Sec31l1	Otp	Pop4		Arhgef15	1	Pea15b	4	BC048678	2	Atf7ip	1
Tmprss2	Ube1y1	Optn	6330403A02Rik		Tmem189	Arhgap24	S100z	Pigy		Arhgef3	1	Pdha2	4	BC050213	2	Atg2b	1
Crim1	Usp9y	AK044786	Slc44a5		Tmem159	AK088579	AK157788	Ctnnbl1		Arid3a	1	Pde5a	4	BC052524	2	Atp11a	1
Uchl3	Depdc2	Ptgds	Tshz1		BC017158	C130026L21Rik	mKIAA1998	Ccdc96		Arid4a	1	Pdcl3	4	BC070425	2	Atp1a2	1
Smad3	AK090150	Tor1a	Trrap		Lace1	Ssh1	Rgnef	Ccdc104		Arid5b	1	Pdcd1	4	BC086805	2	Atp6v1c2	1
Nfatc1	Phf3	Stom	Rimbp2		Cdk5rap2	Mvk	Tmem174	Cntnap2		Armc2	1	Pclo	4	BC096410	2	Atp8a1	1
Wbp2	A230074B11Rik	4933424A20Rik	Amotl1		Ccm2	Sppl3	Slc30a5	Mfsd1		Arvcf	1	Pcdh9	4	BC100491	2	Atp9a	1
Vti1a	Cnga3	Gtdc1	Rcan1		Zadh2	AK132074	AK043460	Eif4e3		Asb7	1	Pcdh20	4	BC100534	2	Atxn1	1
Gipc2	Il18r1	cAMP-GEFII	C030014M07Rik		Tram1l1	2410131K14Rik	AK047765	Rras2		Ascl1	1	Pcdh18	4	Bcl6	2	Atxn2	1
Map3k14	Fhl2	Zfp533	Nr3c2		Olfr1378	Tbx5	Pde4d	Smarcd3		Aspscr1	1	Pcdh15	4	Bcor	2	Atxn7l1	1
Fanca	4832428D23Rik	Clp1	Dusp5		Foxn4	Gpr109a	BC067074	Lsm14a		Atad4	1	Pcbp3	4	Bet1l	2	Atxn7l4	1
Mapk9	Cd28	Pex16	2410002O22Rik		Cdc5l	Denr	Emb	Pi4k2b		Atg2b	1	Pcbd1	4	Bik	2	Auts2	1
Slc23a2	Nrp2	C230071H18Rik	Tox2		Oplah	Piwil1	Kctd6	Rpl14		Atoh8	1	Pax3	4	Bmp4	2	AW146299	1
Cpxm2	Acadl	Pak6	Ajap1		Insig1	Hsp25	Fhit	Psmd9		Atp11a	1	Pawr	4	Bmp6	2	Axin2	1
Tmem131	Erbb4	Catsper2	LOC100039945		Dirc2	Ubce7ip1	Thrb	Srpr		Atp1b1	1	Pard6g	4	Brap	2	AY512909	1
Pabpn1	Spag16	Bpil1	Dnahc9		Katnal1	Baiap2l1	Adk	Calcoco1		Atp6v0a2	1	Pacsin1	4	Brunol4	2	AY672066	1
Ramp3	9430031J16Rik	Gm1006	Otof		Erlin2	Tmem130	Dlg5	Dusp6		Atp9a	1	P2ry2	4	Btbd16	2	Aytl2	1
Acin1	Fbxo36	AK007971	Ablim1		Tshz3	Usp12	Rps24	Asprv1		Atpbd4	1	Otop1	4	Bves	2	B230396O12Rik	1
Tbc1d1	A630001G21Rik	Slpi	Abca2		Thsd4	C130038G02Rik	AK005833	Enoph1		Atrnl1	1	Ostm1	4	C130032J12Rik	2	B3galnt1	1
Foxo1	Efhd1	Wfdc6b	Acvr1b		9030625A04Rik	AK080102	AK015227	Spert		Atxn7	1	Osbpl1a	4	C21orf63	2	B430006D22Rik	1
Pex14	Rnpepl1	Elmo2	Adora2b		Cobl	Casd1	AK146230	Grhl2		Atxn7l1	1	ORF9	4	C4b	2	Bahd1	1
Ggcx	Cdh19	Prkcbp1	Agt		Lhfpl2	Iqub	AK047978	Sfrs6		Atxn7l4	1	Opcml	4	C80913	2	Baiap2l1	1
Acpp	E030049G20Rik	Ube2v1	Akp2		Sh3tc2	6332401O19Rik	BC034735	1700067P10Rik		AU042671	1	Olfr370	4	Cacng3	2	Bank1	1
Ovol1	Dnm3	AK009597	Ap3d1		2310045A20Rik	Skap2	Anxa11	1500001M20Rik		AW049604	1	Olfr234	4	Cacng5	2	Banp	1
Aldh9a1	Fmo2	Atp9a	Zfhx3		2900026A02Rik	Adcyap1r1	Wnt5a	1810011O10Rik		AW456874	1	Olfr178	4	Camk2g	2	Bat2	1
Sorcs1	Rcsd1	BC066135	Btc		Abcc12	Mad2l1	Lrrc18	Hmgb4		AY512941	1	Olfr1310	4	cAMP-GEFII	2	Bat5	1
Ptprt	Ly9	Slco4a1	Btg2		Fbxl4	Paip2b	Opn4	Slc38a4		B230112C05Rik	1	Odz4	4	Camta1	2	BC013481	1
4933428G20Rik	Esr1	BC006779	Cacna1a		Leprel1	BC048671	Gnpnat1	Trip13		B4galt1	1	Odz3	4	Capn8	2	BC018465	1
Moxd1	Grm1	Phc3	Calm3		Gpr26	Hrh1	Ddhd1	Nkd1		B4galt6	1	Ntrk2	4	Capzb	2	BC025054	1
Scn5a	Ccdc28a	Gucy1b3	Camk2b		Iws1	Phc1	Cdkn3	Zdhhc25		B930007M17Rik	1	Nr1d2	4	Cartpt	2	BC026601	1
Fign	Ifngr1	Slc25a44	Cdh3		A230051G13Rik	Capza3	Peli2	Lipn		Bai1	1	NR_002928	4	Cbfa2t3h	2	BC030045	1
p	Taar2	Il6ra	Inadl		Ckt2	AK081271	A630038E17Rik	Lrfn2		Baiap2	1	Npsr1	4	Cbln4	2	BC030396	1
Trpv4	Arhgap18	Fmo5	Dcn		Bai1	Sox5	Jph4	Phf6		Baiap2l2	1	Nlrx1	4	Cbx4	2	BC031353	1
Scube1	Sez4	7530404M11Rik	Dnmt3a		Rbbp6	TIPR	Rnf17	Chit1		Banp	1	Nlrp4f	4	Ccdc21	2	BC031781	1
Scamp2	9030224M15Rik	Adora3	Eef1a2		Txndc15	AU018091	Gjb2	Ppp2r2a		Bap1	1	Nfatc4	4	Ccl9	2	BC033915	1
Slc30a5	Mypn	Gstm2	Sh3pxd2a		2610528K11Rik	V1rg4	Cab39l	Sulf2		Barhl2	1	Nfatc2	4	Ccnd1	2	BC034076	1
Rcan3	Ctnna3	Palmd	Gabrb1		2410129H14Rik	EG629219	Tnfrsf19	Tnfrsf13c		Barx1	1	Neil3	4	Ccrn4l	2	BC034090	1
Edg7	Plekhk1	Fabp2	Gna14		Psapl1	mKIAA0545	Sacs	Pygo1		Barx2	1	Myog	4	Cd4	2	BC037703	1
Eefsec	Tmem26	Gbp5	Gpr19		Prtg	Lsm14a	Dleu7	Txndc1		BC003324	1	Myo18a	4	Cdc123	2	BC038167	1
Wdr61	AK009351	BC024582	Grin2a		Adamts12	Kctd15	Ctsb	Bmper		BC004022	1	Myo15	4	Cdc73	2	BC039791	1
Ssbp3	1200015N20Rik	Grhpr	Hiat1		Lingo2	AK019774	Hmbox1	Dpp8		BC005764	1	Mylc2pl	4	Cdh1	2	BC040754	1
Zfp84	AK034539	Shb	Lrig1		Cpeb2	Klk5	Elp3	Ddit4		BC006885	1	Muted	4	Cdh2	2	BC044880	1
Cldn10	Adora2a	1300002K09Rik	Kcnc3		Apba1	Luzp2	Scara5	Nxnl2		BC013481	1	Mta3	4	Cdh5	2	BC048761	1
Rab21	Col6a1	Baat	Kif5c		Fstl4	Atp10a	Ebf2	1700018L24Rik		BC013712	1	Mrps9	4	Cdk6	2	BC048766	1
Rab5c	Grin3b	Mup2	Ldhb		C130023O10Rik	Lass3	Itm2b	Samd7		BC017158	1	Mobkl2b	4	Cdk9	2	BC049717	1
Acyp1	Pias4	Ambp	Map3k5		Wscd2	Igf1r	4930564B18Rik	Epsti1		BC017647	1	Mlana	4	Cdkal1	2	BC052551	1
Arfgap3	4930547N16Rik	mKIAA1870	Mybpc3		Wscd1	DQ696815	NR_002218	1700018B08Rik		BC021381	1	Mkx	4	Cds1	2	BC059892	1
Tbcb	Hal	Whrn	Nqo1		F830045P16Rik	AK076715	AK007133	1600029D21Rik		BC021611	1	mKIAA1680	4	Cebpb	2	BC062185	1
Ctnnbl1	AK038827	2310009E04Rik	Nmt1		Ppp1r3b	A830073O21Rik	Abcc4	Srxn1		BC022687	1	mKIAA1028	4	Chad	2	BC065127	1
4931406I20Rik	Plxnc1	Cyp2j9	Nrp1		Tmem26	Olfr686	Cldn10	Dapl1		BC026478	1	Mgat4b	4	Chd1l	2	BC072620	1
Pfdn1	Pamci	AK166708	Ntn1		EG329763	Nucb2	Ranbp5	Gper		BC026600	1	mFLJ00277	4	Chd7	2	BC099512	1
Srfbp1	Lin7a	AK144477	Nxn		Opcml	Zfp694	B930095G15Rik	Crispld2		BC026682	1	Mfhas1	4	Chn2	2	BC099526	1
Ndufb8	Syt1	Y08382	Pex7		Mcf2l	Sec23ip	Spef2	Dhrs4		BC030183	1	Mdga1	4	Chst11	2	BC100534	1
Entpd4	Best3	C8b	Prkcb1		Sall3	Cd209c	AK148198	Atf5		BC030469	1	Mdfic	4	Chst8	2	BC141885	1
Slc47a1	Grip1	C8a	Prkcz		Tnfrsf21	BC003267	Pdzd2	Gats		BC030867	1	Magi2	4	Cit	2	Bckdhb	1
Mett10d	Lemd3	AK035774	Ppap2a		C230052I12Rik	Shcbp1	6030458C11Rik	Kcnmb1		BC035532	1	Lrrc33	4	Ckap2l	2	Bcl2l1	1
Chd1l	Avil	Dmrtb1	Ptgis		Tmem30b	AK082314	AK139483	Perq1		BC038822	1	Lrp1b	4	Ckt2	2	Bcor	1
Slc25a39	Ikzf4	BC059842	Ptpn14		Zfp750	Col4a1	Ank	D1Pas1		BC039791	1	Lrfn1	4	Cldn14	2	Bean	1
Cgnl1	Ikzf1	1700041C02Rik	Ptprj		C230095G01Rik	Myom2	Dnahc5	Chrm3		BC040690	1	Lmtk3	4	Clstn2	2	Blcap	1
Tegt	Ehbp1	Sync	Ptrf		Gins2	Csmd1	Ctnnd2	Peli2		BC048599	1	Lmod2	4	Cnih3	2	Bmper	1
Rnasen	Rhbdf1	Epb4.1	Rfx1		Tiparp	AK134636	mKIAA0532	Trim32		BC048655	1	Lmbrd1	4	Col18a1	2	Boc	1
Dus1l	Dock2	Grrp1	Atxn2		Tnfrsf14	Slo3	Ywhaz	Rnf144a		BC048678	1	Lipe	4	Col5a3	2	Bpag1-n	1
Aspscr1	ten-m2	Ldlrap1	Scd1		Ccdc85a	Ppp1r3b	AK144984	Eif3h		BC052328	1	Lhfpl3	4	Cpeb2	2	Brca1	1
Ddah1	Olfr56	Tmem57	Shfm1		Rerg	AK090359	Ubr5	Zcchc14		BC052551	1	Lgr5	4	Cps1	2	Brd4	1
Bap1	Mgat4b	1110049F12Rik	Stk10		1190005I06Rik	D030016E14Rik	Atp6v1c1	Nxph3		BC055324	1	Las1l	4	Crb2	2	Brf2	1
Smyd3	Grm6	Ece1	Ctr9		2610204M08Rik	Rwdd4a	mKIAA0003	Ier3		BC057022	1	Klf5	4	Crot	2	Bri3bp	1
Mrpl12	Col23a1	Rnf186	Ttc3		Pols	AK032387	Tmem74	Cysltr2		BC057079	1	Klf12	4	Csf2rb	2	Brms1l	1
Pak4	BC025076	Zubr1	Vil1		Igsf21	AK006131	Med30	Lypd3		BC057135	1	Klb	4	Ctnna2	2	Brsk1	1
Ppp2r2b	Myh2	Atp13a2	Wnt3a		B930007M17Rik	Nat1	Sntb1	Cops8		BC057627	1	Kl	4	Ctnnbl1	2	Btbd14b	1
Tbc1d9	Foxn1	Arhgef19	Wnt4		AI646023	AK015741	BC030396	Sh3bp4		BC057893	1	Kif2b	4	Ctsh	2	Btbd2	1
Ubiad1	Usp32	Agmat	Wnt7a		Enpp4	AK186650	Tmem65	Rgs3		BC058417	1	Kiaa0819	4	Cttnbp2	2	Btbd3	1
Pdia6	Epx	Fhad1	Zp1		Foxk1	Cyld	Mtss1	BC013481		BC059853	1	Kcnk18	4	Cyb5r3	2	Btc	1
Epn3	Skap1	Masp2	Aebp1		Tssc1	AK019563	Trib1	Cecr5		BC059892	1	Kcnd2	4	Cyp17a1	2	Btd	1
2310028H24Rik	LOC380728	Slc25a33	Akt1		Flrt1	DQ687803	Shag1	2810022L02Rik		BC063263	1	Kcnb1	4	Cyp2b9	2	Btg2	1
Dnmbp	Stat5a	Zbtb48	Bub1b		Tlr12	Terf2	Ddef1	Crtac1		BC067074	1	Katnal1	4	Cyp2c44	2	Bub1b	1
Sulf2	Ace	DD57	Cacna2d3		H2-Q6	AK083706	St3gal1	Wasf3		BC079904	1	Jmjd2c	4	Cyp2d9	2	Bud13	1
Lrrc8e	Kcnh6	AK011879	Camk4		Egfr	Irf8	AK169958	Mbip		BC086315	1	Itsn2	4	Cyp2e1	2	C030014M07Rik	1
Dusp3	Helz	Steap4	Cmas		40791	Slc35f3	Gm628	Tm4sf4		BC086805	1	Irgq	4	Cyp2u1	2	C030017K20Rik	1
Lrpprc	Rgs9	AK035444	Col15a1		NR_002846	1810063B05Rik	Bai1	Il27		BC096410	1	Iqub	4	Cyp3a11	2	C030027K23Rik	1
Cnih3	BC029169	Tcf23	Cradd		NR_002849	AK020930	mKIAA4089	6430527G18Rik		BC099513	1	Iqcd	4	Cyp8b1	2	C130026L21Rik	1
Rin2	Slc16a5	Gckr	Ctbp2		NR_003283	Casp12	DQ701698	Sgcz		BC125002	1	Insig1	4	D18Ertd653e	2	C130038G02Rik	1
Npl	40795	Ablim2	Clip2		NR_003523	AK019792	9030619P08Rik	Slc26a7		Bcas1	1	Inpp4b	4	D19Wsu162e	2	C130050O18Rik	1
Nebl	Nt5c1b	Slc2a9	Ebf3		NR_003620	Chordc1	Rhpn1	D15Ertd621e		Bcdin3d	1	Impg1	4	D230025D16Rik	2	C21orf80	1
Rbm19	Ankmy2	AK017148	Edg3		Itpr1	Hnt	Apol3	Bud13		Bcl11b	1	Ildr1	4	D230039L06Rik	2	C2ta	1
Lrriq2	Immp2l	Rell1	Got1		lpr	Olfr982	Csf2rb	Dap		Best3	1	Il3ra	4	D530005L17Rik	2	C530043G21Rik	1
Efhd1	Nubpl	Klb	Gsta4		Dlk1	Bud13	DQ695909	Pctk2		Bex6	1	Ikzf2	4	D630023B12Rik	2	C79267	1
Scara5	Brms1l	BC013481	Igf1r		Cutl1	AK140089	Pla2g6	Olfr510		Bhlhb3	1	Igsf9	4	D9Ertd280e	2	C85492	1
Ttll11	Dact1	AK006930	Il16		Ephb2	AK018968	Pdgfb	Cd109		Bid	1	Igsf5	4	Daam1	2	Cachd1	1
4933437K13Rik	Rtn1	Grsf1	Kcnh1			AK214683	Rbx1	9530068E07Rik		Bmp6	1	Igsf21	4	Dak	2	Cacna1d	1
Secisbp2	Ttc9	Nup54	Hivep3			Tln2	Pmm1	Clrn1		Bmp7	1	Igfbp5	4	DAPK2	2	Cacna1s	1
Tm7sf4	Abcd4	Lin54	Ltbr			Vps13c	Srebf2	Insig1		Bnip2	1	Ifng	4	Ddc	2	Cacna2d3	1
0610040J01Rik	Tshr	Slc26a1	Mgat3			Bnip2	Pcdhb11	Slain2		Bspry	1	Hsf5	4	Ddefl1	2	Cacng5	1
Tgfbr2	Galc	AK077135	Mpo			Mns1	Bik	Katnal1		Btaf1	1	Hsf2	4	Ddx1	2	Cadm1	1
Pcolce2	Gpr65	Crybb3	Snf1lk			Mapk6	Pnpla5	Plcg2		Btbd14a	1	Hs6st1	4	Ddx46	2	Cadps2	1
Clasp2	9030617O03Rik	Ung	Muc5ac			Gcm1	5031439G07Rik	BC037703		Btbd9	1	Hmha1	4	Depdc6	2	Calb2	1
2010004A03Rik	Begain	Hspb8	Nfix			Hmgn3	Fbln1	Sh3tc2		Bves	1	Hgf	4	Dgkd	2	Calcoco1	1
Atg2b	Ppp2r5c	Taok3	Prkce			Adamts7	Atxn10	4632411B12Rik		C130023O10Rik	1	Hectd1	4	Dhx8	2	Calm3	1
Dnajc18	Ucn3	Sdsl	Plk1			Plscr1	Ppara	Slc39a10		C130050O18Rik	1	Gtf2ird1	4	Dixdc1	2	Calr4	1
Col25a1	Adarb2	Aldh2	Mapk8ip1			Rnf7	Tbc1d22a	Abcc12		C230052I12Rik	1	Gsg1	4	Dna2l	2	Camk1g	1
Tmco4	D130043K22Rik	mKIAA3014	Ptpn3			AK076865	AW049604	Tox3		C230094A16Rik	1	Grm8	4	Dnahc2	2	Camk4	1
Adamtsl2	Fam50b	Gpr109a	Scnn1g			Stag1	Pim3	Serpina3b		C230095G01Rik	1	Grin3b	4	Dnahc5	2	Car10	1
Dync1h1	Ssr1	Pitpnm2	Sema7a			AK076831	Kif21a	Sfrs1		C2ta	1	Grik2	4	Dnaja3	2	Caskin1	1
BC003324	AK053225	NR_003681	Slc20a2			Stac	Glt8d3	9630041N07Rik		C330043M08Rik	1	Grb14	4	Dnmbp	2	CaV1.2-a	1
Lactb	Zfp169	Crcp	Slc2a1			Olfr1324	AK077350	Xkr6		Cabc1	1	Gpr19	4	Dpp6	2	Cbx3	1
Slc26a5	Arl10	Clip2	Slit3			AK006108	mKIAA1382	Dleu7		Cacna1e	1	Gpr156	4	Dpp9	2	Ccdc100	1
Sorcs2	Dbn1	Dtx2	Stat4			Pls3	Slc38a4	Cdh22		Cacna2d2	1	Gpr133	4	Dpys	2	Ccdc104	1
Myo7b	4932411G14Rik	Mylc2pl	Stxbp2			EG546335	Rpap3	2600010E01Rik		Cacng7	1	Gpc6	4	DQ548994	2	Ccdc128	1
Npnt	2010111I01Rik	AK169739	Tbx4			Dgat2l4	Tegt	2610528K11Rik		Camk1d	1	Gpc5	4	DQ686437	2	Ccdc24	1
Cnnm4	Slc35d2	Azgp1	Tnfsf11			Pabpc5	Lfg	Tmem65		Camk4	1	Gm93	4	Dscam	2	Ccdc42	1
Lmx1a	Adcy2	Mafk	Traf3			AK149000	Larp4	Psapl1		Camta1	1	Gm52	4	Dscaml1	2	Ccdc45	1
Adarb2	Tmem161b	BC046508	Vipr1			Mrpl15	Dip2b	4732495G21Rik		Capn2	1	Gltscr1	4	Dscr3	2	Ccdc66	1
Drctnnb1a	Scamp1	Cyp3a11	Sh3bp5			Sntg1	Letmd1	4931440F15Rik		Capzb	1	Glrx5	4	Dst	2	Ccdc96	1
Lmod1	Rgnef	C130038G02Rik	Mapk14			Cpa6	6030408B16Rik	9530091C08Rik		Car12	1	Gja8	4	Dusp10	2	Cd109	1
Impa2	BC099526	Slc25a13	Elk3			Ly96	Krt5	6720458F09Rik		Car9	1	Gipc2	4	Dysf	2	Cd247	1
Pip4k2b	Itga1	Crim2	Gpr162			Pi15	Krt8	Wscd1		Card10	1	Gapdh	4	E330026B02Rik	2	Cd97	1
Alpk3	Fhit	Akr1d1	Lhcgr			Tcfap2b	Sp1	Ldoc1l		Card6	1	Gab1	4	Ebf1	2	Cdadc1	1
Emid1	AK079754	Try4	Pkd1			Kcnq5	Hoxc4	Kctd12		Caskin2	1	Fut9	4	Ebpl	2	Cdc42bpb	1
Lnx2	Wnt5a	Clcn1	Ryk			Ptp4a1	AK086290	Tmem130		CaV1.2-a	1	Fras1	4	Eea1	2	Cdc42ep3	1
Card10	Galntl2	AK081414	Sema4d			Prim2	Socs1	Ccdc42		Cbln1	1	Foxa3	4	Eef1e1	2	Cdca2	1
Baiap2	AK042665	Rarres2	Snap91			Arid5a	AK046786	EG328264		cbp146	1	Fndc1	4	Eefsec	2	Cdcp1	1
Dmbx1	Scara5	Snx10	Clnk			AK132955	Zc3h7a	Vps37b		Ccdc102a	1	Fmo9	4	Efhd2	2	Cdh22	1
Parvb	Lcp1	AK158619	Vps45			Cnnm4	Gt4-1	Centg2		Ccdc67	1	Flt1	4	Efna3	2	Cdh3	1
Cacng7	Klf12	Fabp1	Spdef			Zap70	Rtn4r	Sall3		Ccdc85a	1	Fkbp6	4	EG434280	2	Cds1	1
Scn4a	AK047857	Tmem150	Schip1			Map4k4	Etv5	Wipi2		Ccm2	1	Fhit	4	Egln1	2	Ceacam19	1
Ppargc1b	Dct	AK131839	Col5a1			Il1r1	Hrg	Reep1		Ccng2	1	Fgf9	4	Eif1	2	Cecr5	1
Dnahc5	Abcc4	Dysf	Galnt3			Tpp2	masp3	Ccdc100		Ccnl1	1	Fbxo33	4	Eif1a	2	Celf3	1
Ercc3	AK038711	Pcyox1	Hunk			Gulp1	AK156750	Tmem179		Ccr6	1	Fam50b	4	Eif2c2	2	Centa1	1
Pdk2	Clybl	AK052590	Shroom3			Slc39a10	Tmem44	Mrps10		Ccrk	1	Esrrb	4	Elmo2	2	Centd3	1
Ctdspl	Ptger4	Gkn2	Ercc4			BC029710	AK136047	A2bp1		Cct6b	1	Ephb2	4	Elovl1	2	Centg1	1
Itga9	Osmr	AK215237	Crim1			Asnsd1	Zdhhc19	Cachd1		Cd160	1	Eomes	4	Elovl5	2	Centg3	1
Wwc2	Egflam	Dnajb8	Hs6st3			Mobkl3	mKIAA0226	EG381438		Cd27	1	Eml1	4	Elovl6	2	Cflar	1
Psph	Pdzd2	Lmod3	Park2			AK006768	Iqcg	Lmo3		Cd4	1	Emid1	4	Emid1	2	Chchd6	1
Zdhhc7	5730557B15Rik	Lrtm2	Gpc1			Creb1	Lrch3	Cnot6		Cd79b	1	Emb	4	Endog	2	Chd3	1
Dapk1	Grhl2	Pzp	Auh			BC108272	Slc12a8	40791		CD83	1	Eif4e	4	Ensa	2	Chd4	1
AW049604	Zfpm2	AK040061	Cntnap1			Spag16	Sema5b	Ubb		Cdc14a	1	Efhb	4	Ent1	2	Chit1	1
Elovl5	D15Wsu169e	AK036632	Usp2			Atic	Gtf2e1	Cyp2d13		Cdc42bpa	1	Eea1	4	Epas1	2	Chn1	1
1700088E04Rik	Cacng2	Pde6h	Banp			Mreg	Rabl3	4921511C20Rik		Cdc5l	1	Dyrk1a	4	Epb4.1l1	2	Chrm3	1
Ppp2r4	AK145218	9830102E05Rik	Pmm2			Il8ra	AK082948	Rarb		Cdca7	1	Dusp4	4	Epb4.1l4a	2	Chst1	1
Cspg4	Maff	Nalp12	Dnalc4			AK141842	Drd3	Bcl2l1		Cdh17	1	Dusp27	4	Epb4.1l4b	2	Chst10	1
Satb2	Ttll1	Apoc1	Syt7			Slc19a3	AK016097	Ebf2		Cdh2	1	Dtnbp1	4	Epha2	2	Cidea	1
Centg3	Kif21a	Cyp2a12	Pcnx			Sh3bp4	Ccdc52	Cutl1		Cdh23	1	DQ556070	4	Ephx1	2	Cit	1
Atxn7	Tmem117	Rps16	Pebp1			Col6a3	Ift57			Cdh26	1	Dpyd	4	Erc1	2	Ckap5	1
Vasn	Nell2	Spint2	Lgals8			Otos	AK018679			Cdh5	1	Dppa4	4	Ern1	2	Clip2	1
Cdkal1	AK163711	mKIAA0545	Uqcc			Slco4c1	Bbx			Cdh6	1	Dnmbp	4	Ern2	2	Clrn1	1
Rapgef3	Slc38a1	Capns1	Fnbp1			Cdh20	AK157531			Cdk5rap2	1	Dlg2	4	Esrrb	2	Clstn1	1
Galnt11	BC038822	Cox6b1	Wwox			Tnfrsf11a	Cblb			Cdkal1	1	Dlc1	4	Esrrg	2	Clybl	1
2810003C17Rik	Col2a1	Cd22	Stk3			Zcchc2	AK157499			Cdkl1	1	Defb43	4	Etv6	2	Cmas	1
Wfdc5	Fgf12	Hamp1	Pkp1			Dsel	Cpox			Cdkn3	1	Defb30	4	Ext2	2	Cndp2	1
Eif2b1	Heg1	Usf2	Freq			Cntnap5a	BC042696			Cecr2	1	Ddhd1	4	F10	2	Cnih3	1
BC021381	Nr1i2	Tmem162	Ruvbl1			Gli2	AK019789			Celsr1	1	Dchs1	4	F7	2	Cnksr2	1
Ube2d1	AK082117	Fxyd1	Kcnd2			Dbi	Robo1			Celsr2	1	Dapk1	4	Fabp1	2	Cnksr3	1
BC017647	Lsamp	1600014C10Rik	Cdh13			Thsd7b	Nrip1			Cenpb	1	Dach1	4	Fabp5	2	Cnnm2	1
BC022687	Gap43	Plekha4	Tagln3			AK051055	Cxadr			Cenpc1	1	D6Wsu176e	4	FAE	2	Cnot6	1
Tmem189	Gm609	AK006355	Kcnip3			AK076660	D16Ertd472e			Centa1	1	D19Ertd652e	4	Fam105b	2	Cntnap1	1
9130213B05Rik	Slc9a10	Snrpa1	Gltp			Cdc73	AK019797			Centd2	1	D0H4S114	4	Fat1	2	Cntnap2	1
Hip1	Phldb2	Acan	Stat2			AK158929	Usp16			Centd3	1	Cybrd1	4	Fat3	2	Col13a1	1
C230094A16Rik	Cblb	Furin	Bat2			Ivns1abp	AK016377			Centg2	1	Cxcr7	4	Fbp1	2	Col14a1	1
Rnf144b	Lrriq2	Av381126	Cdgap			Rgs8	Krtap16-7			Centg3	1	Cxcr4	4	Fbxl7	2	Col15a1	1
Lemd2	Epha3	Aqp11	Rbms1			Tnr	Tiam1			Cep63	1	Cubn	4	Fem1b	2	Col27a1	1
BC026682	Jam2	mKIAA0769	Xrcc2			Rc3h1	Sod1			Cetn3	1	Ctnna3	4	Fer1l3	2	Col5a1	1
Rbm17	ORF63	Frag1	As3mt			Cdc42bpa	AK050735			Cflar	1	Csmd3	4	Fez2	2	Col6a3	1
Ppp1r16b	C21orf63	Olfr78	Golga7			Srp9	Itsn1			Cgnl1	1	Csmd1	4	Fgd2	2	Colec12	1
Kif1c	Ifngr2	Prkcdbp	Kit			Capn8	Atp5o			Chaf1b	1	Csf2ra	4	Fgd6	2	Comp	1
9530068E07Rik	Rcan1	Hpx	Glp1r			D1Pas1	AK007854			chat	1	Cradd	4	Fgf2	2	Cops8	1
E130308A19Rik	Hlcs	Anks4b	Drg2			Smyd2	Kcnj6			Chd1l	1	Comtd1	4	Fgg	2	Corl2	1
Eif2c2	Erg	mKIAA0370	Gab1			AK142161	Arid1b			Chd4	1	Col6a2	4	Fgr	2	Cox4i1	1
Col23a1	B3galt5	AK043947	9630031F12Rik			BC030469	5730437N04Rik			Chd7	1	Col6a1	4	Fhad1	2	Cplx2	1
BC030867	Fndc1	Sh2bpsm1	4933428G20Rik			Nenf	Ttll2			Chmp6	1	Col4a1	4	Flrt2	2	Cpvl	1
Cmtm4	AK051008	Sult1a1	Pias4			Nek2	Brp44l			Chpt1	1	Col13a1	4	Flt1	2	Creld2	1
Atoh8	EG240055	Qprt	Pcbp3			Plxna2	Pacrg			Chrne	1	Cobl	4	Fmo5	2	Crim1	1
Igsf11	Tcp11	1700120K04Rik	Nek6			Akap12	AK038428			Cic	1	Cnt3	4	Fn1	2	Crispld2	1
Wwc1	Def6	Btbd16	Tnr			Ust	Slc22a2			Cit	1	Cnr1	4	Fndc3b	2	Crocc	1
Tmem18	Pnpla1	1190003J15Rik	Slc28a3			AK006633	Igf2r			Ckt2	1	Cmklr1	4	Foxn3	2	Crtac1	1
Tshz3	AK144811	Bet1l	Thop1			Fbxo30	smoc2			Clasp2	1	Clec14a	4	Foxo1	2	Crtam	1
Phf17	Pi16	Cox8b	Nisch			Nmbr	BC002059			CLCN3	1	Chst8	4	Foxq1	2	CS444466	1
Tarsl2	4933413N12Rik	Nlrp6	Rtn4r			AK029503	Cacna1h			Clcn6	1	Chst11	4	Fpgs	2	Csk	1
Snx30	BC048393	Athl1	Clstn1			Pde7b	DQ705564			Clcn7	1	Cgnl1	4	Fras1	2	Csmd2	1
Zfp609	Ring1	Th	Agtpbp1			Tbpl1	Hmga1			Cldn19	1	Celsr2	4	Frmd4b	2	Csnk1g2	1
Slc25a21	AK136114	AK007416	Elp4			Enpp1	Clps			Clec4a1	1	Cdkl4	4	Fst	2	Cspg4	1
Sipa1l1	Tap2	Mcf2l	Tsc22d4			C030003D03Rik	Mapk13			Clgn	1	Cdh6	4	Fstl4	2	Csrp2bp	1
Lhfpl2	Hspa1l	Proz	1500019G21Rik			L3mbtl3	Fgd2			Clmn	1	Cdh26	4	Fut8	2	Ctnnbl1	1
Btbd9	Cchcr1	Slc7a2	Stard3nl			BC050071	4933413N12Rik			Clrn3	1	Cdh24	4	G6pc	2	Ctr9	1
D18Ertd653e	Runx2	Gdf15	Ky			Rwdd1	Mdga1			Clstn2	1	Cdh13	4	Galntl4	2	Ctsz	1
Phf20	Tcfeb	Rab3a	Lias			Fig4	Slc37a1			Cml3	1	Cdc2a	4	Gata4	2	Cutl1	1
Dnajc11	Cntnap5c	Nr2f6	Chchd6			AK008417	Snf1lk			Cml4	1	Cd9	4	Gata6	2	Cxcl13	1
2310045A20Rik	Efna5	Heatr3	Anapc11			Pdss2	9030612M13Rik			Cmtm4	1	Ccdc85a	4	Gbp5	2	Cyp2d13	1
Centa1	Fbxl17	Ces6	1110059E24Rik			BC062185	Trim26			Cndp2	1	Ccdc60	4	Gclc	2	Cysltr2	1
E130309D02Rik	AK139806	EG13909	Mrps28			D630037F22Rik	Trim40			Cnih3	1	Ccdc54	4	Gdf15	2	D030051N19Rik	1
Dera	E130009J12Rik	Hp	Map3k7ip1			Aifm2	Clic5			Cnn3	1	Ccdc23	4	Gfra2	2	D10Jhu81e	1
Arhgef10	Rab12	Nudt7	Brf2			Lrrtm3	Runx2			Cnnm4	1	Casz1	4	Gig18	2	D14Ertd581e	1
Plxnb1	Arhgap28	4632417N05Rik	Lonp2			Nrbf2	AK088937			Cntn5	1	Casd1	4	Giyd2	2	D15Ertd621e	1
Dact2	Abcg8	Hsd17b2	Napa			AK016046	Frs3			Coasy	1	Caln1	4	Gjb2	2	D15Wsu169e	1
Palm2	1700106N22Rik	Osgin1	Plxdc2			AK085342	AK195221			Cobl	1	Cacnb2	4	Glrx5	2	D18Ertd653e	1
Tmem132d	Socs5	Fanca	Ergic1			Tfam	DQ716672			Col14a1	1	C85492	4	Gls2	2	D19Bwg1357e	1
Hydin	1700011E24Rik	Rhou	Loh12cr1			AK076771	AK135726			Col23a1	1	C530008M07Rik	4	Gltscr1	2	D1Pas1	1
Ihpk3	4921524J06Rik	Agt	1700021F05Rik			Zwint	Mocs1			Col25a1	1	C330005M16Rik	4	Gm1968	2	D5Wsu178e	1
Sacy	Gtf2a1l	Phxr4	Pef1			Upb1	Sult1c1			Col4a2	1	C21orf63	4	Gm628	2	D630023B12Rik	1
Zbtb37	mKIAA0578	Angptl6	Cdc42ep3			AK143813	BC011426			Col9a1	1	Boc	4	Gm672	2	D630044L22Rik	1
Ephb1	AK220484	EG624219	Tmem178			Txnrd1	Ndufa11			Copa	1	Bdkrb2	4	Gm826	2	D630045J12Rik	1
Galntl4	Osbpl1a	BC010787	Mybphl			AK005183	AK047946			Cox5a	1	Bcl7a	4	Gm833	2	Daam2	1
Crtc3	Dsg3	AK077358	Ubap2			Nuak1	AK160416			Cp	1	Bckdhb	4	Gmeb2	2	Dab1	1
Disc1	Pcdha7	Olfr978	Nkd1			Spic	Vapa			Cpeb2	1	Bcam	4	Gna12	2	Dap	1
BC048599	Pcdha9	BC021608	Wdr51a			D10Ertd322e	mKIAA4044			Cpsf3	1	BC099582	4	Gnaq	2	Dapl1	1
Trak1	Dpysl3	Apoc3	Afap1			Kitl	Ptprm			Cpxm2	1	BC094642	4	Gne	2	Dbc1	1
2310022B05Rik	Tnfaip8	Apoa4	Spata16			Zdhhc17	AK053993			Crb2	1	BC067068	4	Gorasp1	2	Dcdc2	1
Slc35f3	Gm93	Apoa5	4921528I01Rik			Osbpl8	Srd5a2			Crhr1	1	BC050210	4	Got1	2	Dclk1	1
Dhrs9	Zfp474	C630028N24Rik	D5Wsu178e			4921506J03Rik	Birc6			Crim1	1	BC049717	4	Gpam	2	Dcn	1
Mrgpre	Prdm6	Pnr	Ddx54			Rab21	Prkcn			Crocc	1	BC042727	4	Gpc6	2	Dcp1b	1
1110036O03Rik	Atp8b1	AK038653	Plxdc1			AK015188	AW061290			Crtc3	1	BC042696	4	Gpd2	2	Ddef1	1
Ppm1h	Ccbe1	2310007F21Rik	Tmem135			AK076673	4921513D11Rik			Cs1	1	BC023744	4	Gphn	2	Ddit4	1
Glt1d1	Tcf4	BC031353	Cnih3			Cand1	AK153584			Csmd2	1	B3gat2	4	Gpi1	2	Ddx54	1
Fstl4	Zbtb7c	Gclc	1700054N08Rik			AK135691	Map4k3			Csmd3	1	B230120H23Rik	4	Gpr108	2	Dennd2a	1
Ust	Setbp1	Ick	Ttc7			Helb	Cox7a2l			Cspg4	1	B230118G17Rik	4	Gpr109a	2	Dennd4c	1
Vangl1	AK135960	Clstn2	Ift57			1190005P17Rik	AK036982			Cstad	1	AW548124	4	Gpr44	2	Dgki	1
Baiap2l2	Neto1	AK076831	Phf19			Mon2	AK003841			Ctage5	1	AU018091	4	Gpt2	2	Dgkz	1
Hmcn2	Socs6	Zmynd10	Nfam1			AK165129	Prkce			Ctbs	1	Atp5o	4	Gramd2	2	Dhrs4	1
Ablim2	AK007025	Scap	4932438H23Rik			Xbp1	Ccdc128			Ctdspl	1	Arid5b	4	Gramd3	2	Dhrs7b	1
1600021P15Rik	Mamdc2	Tdgf1	8430419L09Rik			Sec61g	Bambi			Ctnna3	1	Arhgap24	4	Grb10	2	Diap2	1
D230039L06Rik	Dock8	AK041339	Atp13a2			Meis1	Svil			Ctnnbl1	1	Arf6	4	Grem2	2	Diras2	1
Tmem130	Rfx3	Oxsr1	1700018L24Rik			Slc1a4	9430022F06Rik			Ctnnd2	1	App	4	Grhpr	2	Dlat	1
Tmem26	Gldc	Gorasp1	Tex22			AK087392	Mib1			Ctr9	1	Apod	4	Grik3	2	Dleu7	1
Dgkk	2010002M12Rik	Otc	Smurf1			AK148130	Gata6			Cubn	1	Aof2	4	Grik4	2	Dlgap1	1
Centg2	Gpr120	AK078795	Clybl			Il9r	3110002H16Rik			Cul1	1	Antxr1	4	Grm8A	2	Dlx3	1
Otop1	Crtac1	Prps1	Atg2b			Kcnmb1	Lama3B			Cutl1	1	Ankrd55	4	Gt4-1	2	Dnahc8	1
Wipi2	Got1	Rgs20	Slc10a7			C1qtnf2	Cdh2			Cx3cl1	1	Ankrd50	4	Gtf2e1	2	Dnahc9	1
Suds3	Abcc2	3110035E14Rik	Bri3bp			Il12b	Dsc1			Cxxc5	1	Ankrd36	4	Gtf2ird1	2	Dnaic1	1
Clrn3	BC057135	Gm106	Rgs7bp			AK087691	D030074E01Rik			Cyb5b	1	Ankrd15	4	H13	2	Dnajc1	1
Scfd2	Tcf7l2	Rim	Vps33a			Nmur2	Rnf125			Cyp2c44	1	Ank2	4	H2afy	2	Dnajc6	1
Lrrc8d	Trub1	Dst	Spata2L			Hand1	Brunol4			Cyp2d22	1	Ank	4	H6pd	2	Dnase1l2	1
Tmem117	Gfra1	Plekhb2	Dync1h1			Zfp692	AK076984			D11Wsu99e	1	Akr1d1	4	Haao	2	Dner	1
Hs3st3a1	Hspa12a	Arid5a	9930013L23Rik			Rai1	AK132929			D16Ertd642e	1	Akr1b3	4	Habp2	2	Dnmt3a	1
Pxdn	Itih5	Tmem131	Rad54l2			Llgl1	2010001M09Rik			D18Ertd653e	1	AK219219	4	Hacl1	2	Dok2	1
Ankrd15	2010003H20Rik	Aff3	Sorcs2			AK019541	AY227026			D1Pas1	1	AK205332	4	Hagh	2	Dot1l	1
Atrnl1	Dnajc1	Npas2	Dscam			Elac2	Ndfip1			D230039L06Rik	1	AK200207	4	Hao1	2	Dpf3	1
Zfp516	Armc3	Gpr45	Ren1			Alox15	Fgf1			D6Wsu176e	1	AK191823	4	Heatr3	2	Dpp6	1
Cdkl1	Gpr158	Bivm	Tas1r2			Nxn	Prelid2			Dab1	1	AK191080	4	Hhex	2	Dpp8	1
Onecut2	St6galnac6	Myo1b	Tsga14			Myo18a	Tcerg1			Dact2	1	AK172672	4	Hip1r	2	Dppa1	1
Unc84b	Rnd3	Ankrd44	Srebf2			Slc46a1	AK044430			Dapk1	1	AK165697	4	Hlf	2	DQ072390	1
1700025G04Rik	Baz2b	Boll	Spred2			Slfn9	Eif1a			Dapk2	1	AK154190	4	Hmgcs2	2	DQ279480	1
Rcor1	Scn3a	Plcl1	Klf7			AK135737	Commd10			Dars	1	AK153491	4	Hmx1	2	DQ284430	1
Akap6	Xirp2	Aox3l1	Cnnm2			Kif2b	AK089049			Dbnl	1	AK151508	4	Hnf4a	2	DQ541757	1
9130011E15Rik	Pacsin3	Nrp2	Wbscr16			JSAP2	Sncaip			Dcbld2	1	AK146150	4	Hrasls3	2	DQ549194	1
Igsf21	Creb3l1	Dytn	Lmx1a			Chad	Snx2			Dctd	1	AK139806	4	Hrg	2	DQ556070	1
AI480653	AK044780	Pthr2	Zfp91			Npepps	Prdm6			Dctn6	1	AK139687	4	Hs3st3b1	2	DQ561039	1
Tbc1d22b	Smox	Fn1	Trim32			Plxdc1	AK036466			Dcun1d4	1	AK136146	4	Hsd17b4	2	DQ563521	1
Gse1	AK077398	Pecr	Pard6g			Hexim2	AK163160			Ddah1	1	AK136021	4	Hsd17b6	2	DQ564750	1
Zfp395	Zfp341	Xrcc5	Egln1			Crhr1	Gramd3			Ddef1	1	AK134652	4	Hspb8	2	DQ566736	1
Foxk1	Ggtl3	Slc11a1	Prelp			Pecam1	AK079263			Ddi2	1	AK133250	4	Hyal1	2	DQ686437	1
Eml4	Tnnc2	Cyp27a1	Alpk3			Smurf2	AK019420			Ddx54	1	AK133166	4	Hyal2	2	DQ694814	1
Lmo7	4833422F24Rik	Wnt6	Elmo1			Pitpnc1	Sh3tc2			Deb1	1	AK132299	4	Ifngr1	2	DQ697070	1
Zfp652	Cyp24a1	Pax3	Srgap3			Axin2	AK042188			Degs1	1	AK132084	4	Igf1r	2	DQ707526	1
Itpr1	Npepl1	Sgpp2	Mrps6			E030025P04Rik	Wdr7			Dera	1	AK087806	4	Igf2r	2	DQ716012	1
Tcof1	Tubb1	Acsl3	Acss1			Map2k6	Onecut2			Dffa	1	AK084200	4	Igfbp2	2	Drg2	1
Sema4a	Rp23-45p4.1	Rhbdd1	Cacng5			AK157980	Nars			Dgkh	1	AK084059	4	Igfbp4	2	Dscam	1
Map2k6	Zfhx4	5033414K04Rik	Lnx2			Bahcc1	mKIAA0439			Dgkk	1	AK083927	4	Igsf5	2	Dse	1
Notch1	Ralyl	Dner	Colec12			BC065777	D18Ertd653e			Dhfr	1	AK082314	4	Il1rap	2	Dsel	1
Smad7	Dnajc5b	Trip12	Baiap2			AK007110	Mc2r			Dhrs7c	1	AK079012	4	Il6ra	2	Dst	1
Cabc1	Nlgn1	Sp110	Pygl			1110057K04Rik	A730085E03Rik			Dhrs9	1	AK076947	4	Incenp	2	dtn-b	1
Pdzk1ip1	Aadacl1	Efhd1	Trhr2			Rdh14	AK036329			Dhtkd1	1	AK076687	4	Inpp5b	2	Dtnb	1
AK012841	Gpr103	Dgkd	Ppargc1b			AK133134	Myo5b			Dirc2	1	AK076664	4	Insc	2	Dusp10	1
AK015316	Fat4	A730008H23Rik	Antxr2			Nol10	Gm672			Disc1	1	AK053334	4	Ints7	2	Dusp14	1
Cdh23	Slc7a11	Spp2	Wwtr1			AK042602	DQ284430			Diws1t	1	AK052572	4	Iqca	2	Dusp6	1
AK017048	Maml3	Iqca	Dst			Tyki	Slc14a2			Dlg5	1	AK051495	4	Iqgap2	2	Dusp7	1
AK019643	Frem2	Rab17	Tnfsf5ip1			AK015219	Ctdp1			Dlk1	1	AK048739	4	Irf2bp1	2	Dync1h1	1
Taf2	AK006465	Ube2f	Tmem109			Nova1	Mbp			Dmbx1	1	AK048710	4	Itih1	2	Dync2h1	1
AK030453	Lmna	Hdlbp	D10Jhu81e			Scfd1	AK156842			Dmrtc2	1	AK045932	4	Itpr2	2	Dync2li1	1
mKIAA3015	Syt11	Tmem157	Prom2			Mbip	Tshz1			Dnahc5	1	AK044041	4	Itsn1	2	Dzip1	1
Secisbp2	Cgn	Phlpp	Satb2			AK053157	Zfp407			Dnahc8	1	AK041437	4	Kalrn	2	E030019B06Rik	1
A230106M15Rik	Pde4dip	Cntnap5a	Centg3			Nin	Lrp5			Dnajc11	1	AK039362	4	Kcnj4	2	E030049G20Rik	1
Akt1	Vtcn1	Gli2	Angel1			Six6os1	Suv420h1			Dnajc18	1	AK038731	4	Kiaa0528	2	E130303B06Rik	1
AK040960	Ntng1	Ralb	Nmnat3			Hif1a	Gstp2			Dnajc5b	1	AK034282	4	Kif14	2	E230008N13Rik	1
Zubr1	AK163681	Sctr	Myrip			Max	Cabp2			Dnase1	1	AK029692	4	Kirrel3	2	E2f6	1
Tnrc6a	Abca4	E030049G20Rik	Susd4			Actn1	AK148054			Dnm3	1	AK029624	4	Klhdc7a	2	Ebf2	1
AA407659	Bcar3	Mgat5	Klhdc8a			Smoc1	Hrasls3			Dnmbp	1	AK021299	4	Ksr1	2	Ebf3	1
Pbx1	Hadh	Lct	Camk1g			Rgs6	Incenp			Dock1	1	AK020930	4	Lamb3	2	Ece1	1
Clcn6	AK076734	Mapkapk2	Hhat			Npc2	Tle4			Dock5	1	AK020506	4	Lamc1	2	Ece2	1
CLCN3	Cisd2	Rassf5	BC018465			Ston2	Tmem2			Dock9	1	AK019818	4	Larp5	2	Ecm1	1
AK046742	Adh6a	Ikbke	Atp1a3			Flrt2	Trpm3			Dpagt1	1	AK019672	4	Lbh	2	Edar	1
AK048739	BC075654	Slc45a3	Wasf3			Spata7	Mamdc2			Dpf3	1	AK019598	4	Lepr	2	Edg3	1
Card6	St6galnac5	Rbbp5	Appl2			Ptpn21	Ankrd15			Dph3	1	AK018924	4	Letmd1	2	Edn1	1
AK053124	St6galnac3	Pik3c2b	Scgn			Ttc8	Smarca2			DQ284430	1	AK018847	4	Lfg	2	Edn2	1
Nob1	Gabrr1	Etnk2	Dhrs7b			AK006884	AK076909			DQ546052	1	AK018584	4	Lhfpl2	2	Eef1a2	1
Neurl	Edg2	Adora1	Zfp503			Calm1	Vldlr			DQ551402	1	AK007042	4	Lipg	2	Eef2k	1
AK084778	Tnc	Lgr6	Stk24			Serpina6	Kcnv2			DQ556070	1	AK006465	4	Lmln	2	Efemp2	1
AK085459	Dbc1	Kif21b	Tbc1d22a			Eml1	Glis3			DQ556350	1	AI987944	4	Lmx1a	2	EG328264	1
AK089123	Atg4c	Nek7	Dlat			AJ517767	Kiaa1815			DQ556351	1	AI851790	4	LOC546840	2	EG381438	1
Nme7	Skint6	Rnf2	Evc2			Hsp90aa1	Cstf2t			DQ562562	1	Aff3	4	Loxl2	2	EG406223	1
Agrin	4931406I20Rik	Niban	Fntb			Rcor1	NR_002849			DQ705824	1	Adamts6	4	Lrp6	2	EG434280	1
AK138811	Zfp69	Lamc1	BC031781			4732474O15Rik	1810073H04Rik			DQ715667	1	Adad1	4	Lrrc3	2	EG639653	1
BC055324	A3galt2	Rgs8	Slc26a7			AK087718	AK039361			DQ716672	1	Abca6	4	Lyplal1	2	Egln1	1
AK143784	Zfp46	AK154552	Rhbdd2			Klf6	Hhex			Drctnnb1a	1	A230054D04Rik	4	Lyzl1	2	Ehd1	1
Edg4	C79267	Qsox1	Gmds			Pitrm1	AK018976			Dtnbp1	1	9130401M01Rik	4	Macrod2	2	Eif1b	1
AK145161	Tas1r2	Qscn6	Ppp4r1			Pfkp	Gpr120			Duox1	1	9030205A07Rik	4	Mafb	2	Eif3h	1
AK148126	Padi1	Qsox1	Nrd1			AK135744	Cyp2c70			Dus1l	1	6D	4	Mamdc2	2	Eif4e2	1
Rnf43	Casz1	9430070O13Rik	Actr2			Adar3	mlr2			Dusp3	1	6430502M16Rik	4	Map2k5	2	Eif4e3	1
MRPS11	Camta1	Tor3a	Zfand3			AK215297	Marveld1			Dusp5	1	5033411D12Rik	4	Map4k3	2	Elk3	1
Cflar	Steap4	Tnr	Kcnq3			Zmynd11	4933417O08Rik			Dym	1	4933415F23Rik	4	masp3	2	Ell2	1
Slc35b4	Pclo	Slc19a2	Mon2			Prl2c2	Got1			Dync1h1	1	4933407C03Rik	4	Mat2a	2	Elm1	1
AK164256	Lhfpl3	Uck2	Mical3			AK085253	Cpn1			Dync1i2	1	4933402P03Rik	4	Max	2	Elmo2	1
Hlcs	Ldb2	Lmx1a	Nphp4			Rala	Cyp2c44			Dynlrb2	1	4933400E14Rik	4	Mboat5	2	Elmo3	1
Pik3r1	Slit2	Pbx1	Dusp7			mKIAA0281	Scd1			Dyrk1b	1	4931408C20Rik	4	Mcf2l	2	Elp4	1
AK182874	Cckar	Atf6	Phldb1			DQ686689	Nolc1			Dysf	1	4930511I11Rik	4	Mchr1	2	En1	1
AK203140	AK078705	Ndufs2	Igsf11			Nrsn1	Cyp17a1			E130308A19Rik	1	4930474N05Rik	4	Mcph1	2	Enoph1	1
Celsr2	Gabrb1	Wdr42a	Wwc1			Agtr1a	AK090268			E130309D02Rik	1	4930465K10Rik	4	Mef2d	2	Enox1	1
Kif3b	Paqr3	Fmn2	Dync2li1			EG432743	Ins1			E2f6	1	2610206B13Rik	4	Mical3	2	Entpd7	1
BC006885	Sparcl1	Kmo	Hnt			AK005856	Mxi1			Ecm2	1	2610039C10Rik	4	Minpp1	2	Epb4.1l4a	1
BC026478	2410025L10Rik	AK046316	Med13l			BC048601	Adra2a			Ecsit	1	2410129H14Rik	4	Mki67ip	2	Epha5	1
Car12	Sez6l	6330403A02Rik	Slc24a2			Tcfap2a	mKIAA1560			Edar	1	2310035C23Rik	4	mKIAA0008	2	Epn2	1
Atad4	Taok3	Capn2	Slc25a12			Phactr1	Tectb			Edg4	1	2310009E04Rik	4	mKIAA0387	2	Epsti1	1
BC035532	Tbx5	Capn8	Boc			Gmpr	Vti1a			Edg7	1	2300002M23Rik	4	mKIAA0545	2	Erc2	1
BC048655	Iqcd	Mosc2	Sh3bgrl2			AK044426	Ppnr			Eefsec	1	2210016L21Rik	4	mKIAA1181	2	Ercc6	1
Itsn1	Ccdc63	Rrp15	Dse			AK034282	Tcf7l2			Efhd1	1	2010111I01Rik	4	mKIAA1188	2	Ergic1	1
Hemk2	P2rx7	Spata17	Adamtsl1			DQ721672	AK052788			Efna5	1	1810030O07Rik	4	mKIAA1337	2	Etv6	1
Rere	AK006725	Gpatch2	Cnksr3			Edg3	AK047239			EG329763	1	1700018B24Rik	4	mKIAA1464	2	Exosc6	1
Srd5a1	Glt1d1	Prox1	Unk			Thoc3	Habp2			EG434197	1	1700018B08Rik	4	mKIAA1971	2	Ext2	1
Ndufa12l	Gpr133	Rps6kc1	Zfp523			Pitx1	BC055806			EG545253	1	1700013N18Rik	4	mKIAA3014	2	Eya2	1
Ptpn13	Asl	Kcnh1	Btbd9			BC027057	AK019620			Egfr	1	1700012H17Rik	4	mKIAA3015	2	Fa2h	1
DQ562562	Auts2	Utrn	D18Ertd653e			AK040640	AK045643			Eif2b1	1	1700011F14Rik	4	mKIAA4044	2	Fbln1	1
DQ715667	Por	Phactr2	Centa1			Cntnap3	1700011F14Rik			Eif2c1	1	1700008P02Rik	4	mKIAA4155	2	Fbxl17	1
Mtl5	Ocm	Aig1	Ankrd52			4930458L03Rik	Rab11fip2			Eif2c2	1	1700007G11Rik	4	Mlf1ip	2	Fbxw8	1
Btaf1	Cyp3a41a	Reps1	Kcnh5			Zfp369	3110001A13Rik			Eif4e	1	1600029D21Rik	4	Mmd2	2	Fcgbp	1
Cubn	Slc7a1	mKIAA1244	Dip2b			Zfp273	Itih2			Eif4e2	1	1190005I06Rik	4	Mn1	2	Fgf12	1
Pthr1	Peg10	Perp	Vwa2			Pols	Pter			Elf3	1	1110012J17Rik	4	Mobkl2a	2	Fgf9	1
Chmp6	AK173072	Moxd1	Zfp462			Med10	Nebl			Elmo1	1	Zscan2	3	Mosc2	2	Fgfr2	1
LOC100043868	Foxp2	AK008073	Gpatch3			AK051417	Dnajc1			Elovl5	1	Zmynd11	3	Mpdz	2	Fhit	1
Cenpb	BC099512	Arhgap18	Slc6a11			AK013308	AK188320			Elovl6	1	Zim1	3	Mpp7	2	FHOS2	1
Hadh	mTPK1	Ptprk	Agbl1			AK053270	Arhgap21			Emb	1	Zfp94	3	Mrpl14	2	Fkbp8	1
Mrc2	AK129160	Dse	Heg1			F2r	Gpr158			Emid1	1	Zfp694	3	Mst1	2	Flrt1	1
Prkar2a	AK039090	Slc16a10	Mgat5b			1700029F12Rik	Ehmt1			Eml4	1	Zfp612	3	Msx1	2	Flrt3	1
Rapsn	Lrrtm4	Amd2	AI427515			AK030468	Lcn12			Enc1	1	Zfp607	3	Mtnr1a	2	Fntb	1
Rps6	Sema4f	5033413D22Rik	Cds1			Mast4	Lhx3			Enpep	1	Zfp536	3	Mtus1	2	Foxg1	1
Cx3cl1	Prickle2	Pdss2	6530401C20Rik			AK011877	Notch1			Enpp4	1	Zfp467	3	Muc6	2	Foxn3	1
Tnfaip2	Lmod3	Prep	2310016F22Rik			Ipo11	BC050122			ENSMUSG00000053178	1	Zfp462	3	Mup3	2	Foxo3a	1
Psmd3	Chl1	AK039734	Rab6b			AK047765	Olfm1			Entpd4	1	Zfp36l3	3	Mylip	2	Frem2	1
Apobec2	AK087115	Pla2g12b	BC030396			Rab3c	Nup214			Entpd7	1	Zfp217	3	Myo18b	2	Freq	1
Capn2	Plekhg6	AK166044	Prr12			AK140017	PBX3			Epb4.1l4a	1	Zfp180	3	Myom1	2	Frmd6	1
Fkhl18	AK012387	Cdh23	Dnaic1			BC067074	Ggta1			Epb4.1l5	1	Zfp169	3	Myom3	2	Frmpd1	1
Olfr54	Emp1	Adamts14	Bdh1			Arl15	Ttll11			Ephb1	1	Zfa	3	Nags	2	Fshr	1
Ptprs	Pik3c2g	X99384	Ttyh3			AK016040	AK163151			Ephb2	1	Zbtb7c	3	Nalp12	2	Fstl4	1
Rbl2	Slco1a6	Eif4ebp2	Lhfp			Pelo	Nr5a1			Epn3	1	Zbtb43	3	Nav1	2	Fto	1
Surf2	Kcnj8	Aifm2	Orai1			Fhit	Ppp6c			Eps8l3	1	Zbtb24	3	Ncald	2	G6pc2	1
Ccnl1	1700023A16Rik	Col13a1	6430571L13Rik			Ptprg	AK006114			Erc1	1	Zap70	3	Ncor2	2	Gaa	1
Th1l	Pthlh	Dna2l	Rab11fip4			Ube2e2	Tas2r134			Ercc1	1	Yipf4	3	Ndrg2	2	Gab1	1
Mettl9	Leng8	Reep3	Chn1			Kcnk5	Nr4a2			Ercc3	1	Wdfy3	3	Ndst1	2	Gabrb1	1
Mrto4	6030429G01Rik	Nrbf2	2810457I06Rik			Dnahc12	Itgb6			Erf	1	Vps13c	3	Ndufs7	2	Gadd45g	1
Bves	Zfp787	Arid5b	Zcchc7			Arhgef3	Rbms1			Erlin2	1	Vdac1	3	Nebl	2	Galc	1
2310016E02Rik	Bbc3	1700040L02Rik	Vwc2			AK036749	Tank			Esd	1	Vangl2	3	Nedd4l	2	Galnt3	1
Gtlf3b	Slc1a5	Ank3	Ceacam19			Wapal	Gcg			Esm1	1	V1rg4	3	Nedd9	2	Galnt9	1
Fis1	Prkd2	AK015956	Fstl4			Nrg3	Fastkd1			Espn	1	Ust	3	Negr1	2	Galntl4	1
Myst1	Eml2	Zwint	Pde4dip			BC061237	Ssb			Esx1	1	Usp15	3	Nek6	2	Gap43	1
Nt5c3l	Gpr4	av	Arrb1			Ubb	mKIAA0137			Etv6	1	Usp12	3	Nek7	2	Gats	1
Tegt	Ppp1r13l	Rtdr1	Dab1			Cdkn3	cAMP-GEFII			Evl	1	Unc13c	3	Nfasc	2	Gde5	1
Wars2	Plaur	Upb1	Wscd2			Gch1	AK019889			Evl1	1	Ucn3	3	Nfatc2	2	Gdf1	1
Chaf1b	Lipe	Ggtla1	Trpm3			4932432K03Rik	Sp3			Exoc1	1	Ubxd7	3	Nfib	2	Gfod1	1
Ampd2	C330005M16Rik	Pofut2	Gpr157			AK033525	Wipf1			Eya2	1	Ubr2	3	Nfic	2	Gfpt2	1
Sohlh2	Zfp27	wdp103	Zfp3			Lat2	Chrna1			Ezh1	1	Ube2v1	3	Nfil3	2	Ghrhr	1
Wbp2nl	BC053749	Abca7	Ablim2			Jph4	Mtx2			F830045P16Rik	1	Ubce7ip1	3	Niban	2	Git2	1
Uck2	Upk1a	Sbno2	Kif26b			Gzmb	AK199495			Fanci	1	Ubb	3	Ninj1	2	Glis3	1
Hemk1	1600014C10Rik	Mobkl2a	Tmem26			AK134888	Lrrc55			Fars2	1	Tyrp1	3	Nmnat3	2	Glp1r	1
BC017158	Ceacam18	Sgta	Centg2			AK076848	Olfr1036			Fat4	1	Ttll7s	3	Nos1ap	2	Glt1d1	1
Arhgap8	Syt3	9130206N08Rik	Dppa1			AK200207	AK087376			Fbln2	1	Ttll1	3	Nphp4	2	Gltp	1
Eif2c1	Myh14	Tjp3	Pacsin1			Elp3	Creb3l1			Fbxl10	1	Ttf1	3	Nptx1	2	GLUTX1	1
Hscb	Trpm4	Pip5k1c	Flrt3			Adra1a	Slc35c1			Fbxl4	1	Ttc9	3	NR_002452	2	Gm114	1
2810451A06Rik	Bcat2	AK018959	3110035E14Rik			NR_002218	DQ716085			Fbxo11	1	Ttc5	3	Nr0b2	2	Gm1965	1
Arhgef15	Abcc6	Nr1h4	Atp1a2			NR_002862	Syt13			Fbxo21	1	Trub1	3	Nr1h4	2	Gm239	1
Sfxn5	Luzp2	Scyl2	Gpr153			AK219219	4631405J19Rik			Fbxo25	1	Trps1	3	Nr1i2	2	Gm317	1
BC030183	Chrna7	AK039960	Bat5			Klf12	Tspan18			Fbxo41	1	Trpm4	3	Nr1i3	2	Gm323	1
Sgsm2	Tarsl2	4930485B16Rik	Reep1			AK015289	Ext2			Fez2	1	Trpd52l3	3	Nr2c1	2	Gm347	1
AK122525	Rccd1	Lta4h	Klhl2			AK051495	2600010E01Rik			Fgd3	1	Trmt11	3	Nr3c2	2	Gm467	1
Clec4a1	Slc28a1	Amdhd1	Tigd5			Slitrk1	Fjx1			Fgf1	1	Trim9	3	Nrn1	2	Gm52	1
NR_003293	Ccdc81	Ndufa12	Gpr107			Mbnl2	Caprin1			Fgf18	1	Trim42	3	Nrp2	2	Gm920	1
Itpr1	Sytl2	AK017586	Hs3st3a1			Slc15a1	AK076716			Fgf9	1	Trim32	3	Nsf	2	Gmds	1
	Kctd14	Wdr51b	Tmem179			BC006662	A930018P22Rik			Fgfr2	1	Tpte2	3	Nudt7	2	Gna14	1
	P2ry6	Osbpl8	Cdc42bpb			Dab2	Cstf3			Fhod3	1	Tns3	3	Oaf	2	GOBLIN	1
	Frag1	AK084517	Rims4			Fyb	AK165089			Fign	1	Tnrc18	3	Odz4	2	Golga5	1
	Spon1	Frs2	Igf2bp2			Cdh10	Bbox1			Fis1	1	Tnfrsf21	3	Osbpl8	2	Golga7	1
	Syt17	Mdm1	1700025G04Rik			Zfp622	Fmn1			Fkhl18	1	Tnfaip8	3	Padi1	2	Got1	1
	Zfp689	AI851790	Nup188			Ctnnd2	Bmf			Flcn	1	Tmem79	3	Pag1	2	Gpatc1	1
	4631426J05Rik	R3hdm2	Dlgap3			A930016P21Rik	Exdl1			Flrt1	1	Tmem63b	3	Palmd	2	Gpatch3	1
	Mupcdh	Lrp1	Ablim3			Stk3	Pla2g4b			Fmnl3	1	Tmem5	3	Papolg	2	Gpbar1	1
	NR_002855	Zbtb39	Bckdhb			Rrm2b	Ehd4			Fmod	1	Tmem28	3	Papss1	2	Gpc1	1
	Mrgprf	Hsd17b6	Theg			Odf1	6030465E24Rik			Fndc1	1	Tmem16h	3	Parp11	2	Gper	1
	Mrgprd	Ascc2	Tssc1			Azin1	Sema6d			Fndc3b	1	Tmem132d	3	Parp4	2	Gpha2	1
	Efnb2	Nf2	Man1c1			Rims2	3110001I20Rik			Foxk1	1	Tmem130	3	Pax3	2	Gpr146	1
	Cln8	Thoc5	Npc1l1			BC048765	Atp8b4			Foxn4	1	Tmcc2	3	Pax7	2	Gpr153	1
	Thsd1	2010005J08Rik	Opa3			Fog-2	Mal			Foxo1	1	Tmc4	3	Pcaf	2	Gpr157	1
	Gpr124	Camk2b	Syngr1			Zfpm2	Bcl2l11			Frap1	1	Tln2	3	Pcnxl2	2	Gpr161	1
	Sorbs2	Upp1	NR_002846			Nudcd1	Sirpa			Frmd4a	1	Tktl2	3	Pcsk6	2	Gpr162	1
	Ccdc110	Vwc2	Tcof1			Kcnv1	Rnf24			Fshb	1	Tjp2	3	Pcsk9	2	Gpr175	1
	1700029J07Rik	Ddc	Prkcb1			Med30	AK030453			Fstl4	1	TIPR	3	Pctp	2	Gpr180	1
	Lrp2bp	Egfr	St8sia5			Taf2	svct2			Fto	1	Timm8a2	3	Pdcd4	2	Gpr19	1
	Sh3rf1	Ehbp1	Lyst2			BC026439	Hao1			Fxr1h	1	Thoc6	3	Pddc1	2	Gpr65	1
	AK131860	Fgf18	Mcam			Naprt1	Plcb1			Fyn	1	Tfrc	3	Pde4b	2	Gpsm1	1
	Gmip	EG574403	ADAM22			Pdgfb	Tasp1			Gab1	1	Tex19	3	Pde6h	2	Grb2	1
	Klhl26	ten-m2	Plec1			AW049604	Macrod2			Gabbr2	1	Tessp2	3	Pdlim5	2	Grg4	1
	Inpp4b	Odz2	Zfp422			mKIAA4191	Snx5			Gabrg3	1	Terf2	3	Pemt	2	Grhl2	1
	Gpt2	Ebf1	Sfxn5			Lrrk2	8430406I07Rik			Galnt11	1	ten-m3	3	Pex26	2	Gria2	1
	AK051321	ADAM19	Crhr1			Pdzrn4	AK041531			Galntl2	1	Tcf7l2	3	Phc2	2	Grina	1
	Chst4	Sgcd	Bpag1-n			Pdzrn4	Foxa2			Galntl4	1	Tcf4	3	Phf15	2	Grip1	1
	4932417I16Rik	Col23a1	mKIAA1125			Glt8d3	Sstr4			Gap43	1	Tbc1d5	3	Phf17	2	Grm2	1
	Cdyl2	AK138811	AK007162			Pus7l	5430432M24Rik			Gas1	1	Tas1r2	3	Phtf2	2	Gsc	1
	Slc35f3	Slc36a2	SRPK1			Tmem16f	AK006531			Gas2	1	Syt10	3	Pi4k2a	2	Gsta4	1
	B3gat1	Gemin5	1700041B01Rik			Slc38a1	Id1			Gas6	1	Svep1	3	Pigr	2	Guca1b	1
	AF060570	2810021J22Rik	ten-m2			Rpap3	AK172452			Gata6	1	Sult5a1	3	Pik3c2b	2	Gucy2d	1
	AK084170	1110031B06Rik	C530043G21Rik			Senp1	Ahcy			Gba	1	Stom	3	Pik3r1	2	Gzmb	1
	Tmem136	Pemt	Smarcal1			Olfr234	Epb4.1l1			Gcm1	1	Stk39	3	Pim1	2	H1foo	1
	Scn2b	Rai1	AK038992			AK016307	Blcap			Gfra1	1	Stk22s1	3	Pitpnb	2	Habp2	1
	Il10ra	Lrrc48	Tmem112			Letmd1	Sfrs6			Ggcx	1	Stat5A	3	Pkd1l2	2	Hadha	1
	sgigsf	4933439F18Rik	AK043747			Scn8a	2410116G06Rik			Gins2	1	Stard3	3	Pkp4	2	Hdgfrp2	1
	Tnfaip8l3	Aldh3a2	AK047978			NR_003628	Hnf4a			Gipc2	1	Stag3	3	Pla2g12a	2	Heatr5b	1
	Chrna3	Epn2	Acin1			1810013L24Rik	5830472M02Rik			Git1	1	Stag1	3	Pla2g5	2	Heca	1
	AK048681	Ttc19	Ttc15			Chrd	Svs2			Gli2	1	St6galnac2	3	Pla2g6	2	Hecw1	1
	Spesp1	Hs3st3b1	Tubgcp6			Crygs	Wfdc3			Glis1	1	Ssh1	3	Plekhb2	2	Herc3	1
	Lctl	Aloxe3	Gaa			Bcl6	Mmp9			Glis3	1	Srd5a2	3	Plekhg3	2	Hhatl	1
	DAPK2	Chrnb1	Trpc4ap			Bex6	Cdh22			Glt1d1	1	Spry2	3	Plg	2	Hiat1	1
	AF529169	Asgr2	BC034090			Kalrn	Elmo2			Gltscr2	1	Spred3	3	Plxdc1	2	Hipk3	1
	AK015891	Alox12e	AU040829			Adcy5	2810408M09Rik			Gm1587	1	Spink2	3	Plxnc1	2	Hivep3	1
	Trim42	Arrb2	AK081879			Dtx3l	AK077074			Gm1604	1	Spesp1	3	Pnpla1	2	Hlcs	1
	1110001D15Rik	BC011467	Wwox			4932425I24Rik	AK054128			Gm414	1	Speer2	3	Pnpla5	2	Hlx	1
	Bsn	mKIAA0399	Pknox2			Gramd1c	AK027991			Gm572	1	Snx9	3	Pnr	2	Hmga1	1
	Scap	Smyd4	Tctn2			Atp6v1a	Pard6b			Gm628	1	Snw1	3	Pon1	2	Hmgb4	1
	Crtap	Prpf8	AK090251			AK157531	Nfatc2			Gm672	1	Snf1lk	3	Por	2	Hnf4a	1
	Rbms3	Nxn	Gm317			Alcam	BC049717			Gm693	1	Smurf2	3	Pou2af1	2	Hpcal1	1
	Itga9	Blmh	AK135715			AK015072	AK006474			Gm833	1	Smpdl3b	3	Ppa1	2	Hrh1	1
	Axud1	Slc6a4	AK140632			Arl6	Mc3r			Gmds	1	Slo3	3	Ppap2b	2	Hs2st	1
	Mobp	Slc46a1	Apc2			DQ694814	1700029J11Rik			Gnaq	1	Slitrk5	3	Ppard	2	Hs3st3a1	1
	Gripap1	Tmem97	Cacna1s			Pros1	Tcfap2c			Gnat2	1	Slit3	3	Ppargc1a	2	Hs6st3	1
	Efhc2	Ksr1	Abi1			Pou1f1	Bmp7			Gnb2l1	1	Slit2	3	Ppargc1b	2	Hsf2bp	1
	Dock11	AK053136	Sidt2			9330155M09Rik	Ctcfl			Gng7	1	Slco6b1	3	Ppp1r3c	2	Hspa12a	1
	Odz1	Accn1	Elmo3			AK015664	Pck1			Golga4	1	Slco5a1	3	Ppp6c	2	Hspg2	1
	1600014K23Rik	Unc45b	ADD2			Robo2	Zbp1			Gopc	1	Slc9a10	3	Pqlc1	2	Ica1	1
	A830080D01Rik	Taf15	Vgll4			Rbm11	AK145161			Gp2	1	Slc9a1	3	Prepl	2	Id2	1
	Ptprn	Brip1	Gde5			Samsn1	1700021F07Rik			Gpc5	1	Slc7a15	3	Prhoxnb	2	Ier3	1
	1700025G04Rik	Ypel2	AK164976			Prss7	Vapb			Gpc6	1	Slc5a4a	3	Prkar2a	2	Ift57	1
	AK029630	1200011M11Rik	Otog			Ncam2	Stx16			Gpr101	1	Slc25a37	3	Prkcn	2	Igf1r	1
	AK165776	Mtmr4	Atp13a2			2310002B14Rik	Rp23-45p4.1			Gpr116	1	Slc25a12	3	Prlr	2	Igf2bp2	1
	Dcbld1	Dgke	Ppfibp2			AK133727	Cdh26			Gpr126	1	Slc24a1	3	Prox1	2	Igsf11	1
	mFLJ00277	Pctp	Hdgfrp2			Sfrs15	Lama5			Gpr26	1	Slc1a1	3	Proz	2	Igsf9b	1
	Grin3b	Mmd	Tor2a			4932438H23Rik	Polr3k			Gpr37l1	1	Slc16a5	3	Prpf8	2	Ikzf3	1
	Lyzs	Hlf	Elm1			AK007854	AK048280			Gpr56	1	Slc13a4	3	Prps1	2	Il12a	1
	AK082096	Abcc3	C21orf80			Ripply3	1700008G05Rik			Gpr87	1	Slc12a2	3	Prtg	2	Il16	1
	Spred-2	Rsad1	Krc			Fndc1	Car13			Gramd1b	1	Skap2	3	Psap	2	Il17rd	1
	Mgat4b	Xylt2	Crocc			T	LOC381484			Grap2	1	Sh3rf1	3	Ptp4a1	2	Il27	1
	Vdac1	AK139229	Cd247			Pde10a	AK033061			Grhl3	1	Sf3b5	3	Ptp4a2	2	Il6st	1
	BB220380	Myst2	mKIAA1158			1700010I14Rik	AK080657			Grik3	1	Sez6l	3	Ptpn21	2	Insig1	1
	AK089512	Spop	A630038E17Rik			4932702K14Rik	AK015118			Grin2d	1	Sestd1	3	Ptpn6	2	Irx2	1
	C130039O16Rik	Zfp652	Ccdc45			AK019626	Fndc3b			Grm4	1	Sepp1	3	Ptprd	2	Irx3	1
	Kcnk13	Cbx1	Metrn			Pacrg	E030011K20Rik			Gse1	1	Senp7	3	Ptprm	2	Irx6	1
	Serpina11	Ikzf3	DQ541757			smoc2	Pld1			Gsn	1	Senp5	3	Pvrl3	2	isl1-beta	1
	E2f3	Rara	DQ549194			Chd1	Kcnmb2			Gsr	1	Sema6a	3	Pzp	2	Itga10	1
	Fam50b	Igfbp4	Diras2			Fpr-rs2	AK042235			Gtf2ird1	1	Sema5a	3	Qscn6	2	Itga4	1
	Taf9	Smarce1	Src			AK144317	Fgf2			Gtlf3b	1	Sema4f	3	Qsox1	2	Itga6	1
	Zmiz1	Stat5b	Heatr5b			Tcp11	AK134652			H2-Q6	1	Sema3e	3	Rab36	2	Itgb1bp3	1
	Mtrf1	Stat5A	Rbm24			1110021J02Rik	Pgrmc2			H2afy	1	Sema3a	3	Rabl3	2	Itsn1	1
	BC048859	Atp6v0a1	Cit			Dnahc8	D3Ertd751e			Hadh	1	Sec31l1	3	Rad50	2	Jazf1	1
	Abat	Ifi35	Lgals1			Cyp4f15	AK132084			Hand2	1	Sec23ip	3	Rapgef5	2	jnk1	1
	Muc20	Dhx8	Serpinf2			Angptl4	Ccrn4l			Hausp	1	Sec16b	3	Rassf3	2	Jund1	1
	Rabl3	Hdac5	Sorbs1			1700022C21Rik	AK081086			Hdlbp	1	Scn9a	3	Rassf8	2	Katnal1	1
	4921526F01Rik	AK135410	Ehd1			Olfr126	Nbea			Hemk1	1	Scn3a	3	Rbm19	2	Kcnab2	1
	AK138253	Wdr68	Il6st			Crisp1	Tsc22d2			Hemk2	1	Scaper	3	Rbp4	2	Kcnc3	1
	AK085062	Ern1	Krt32			Cyp39a1	Rap2b			Herpud1	1	Sash1	3	Rbpj	2	Kcnd2	1
	Thoc6	Tex2	Sema7a			Clic5	B3galnt1			Hes2	1	Sall3	3	Rcbtb2	2	Kcnh5	1
	U2af1	BC006965	Sox8			Mrpl14	Gm414			Hgs	1	S60130	3	Rdbp	2	Kcnip3	1
	AK161843	Slc39a11	Clnk			Dazl	Fstl5			Hip1	1	Rxfp2	3	Reg4	2	Kcnj12	1
	Tnfrsf21	Sstr2	Nes			DQ550653	Rxfp1			Hk2	1	Rwdd4a	3	Rfg	2	Kcnj2	1
	AK012381	Sdk2	Runx3			Ppp4r1	Tdo2			Hlcs	1	Rtp1	3	Rfx1	2	Kcnk10	1
	Rbm4	4933422H20Rik	B3galnt1			AK039494	Accn5			Hmcn2	1	Rshl1	3	Rgs12	2	Kcnk7	1
	Slc15a3	Grb2	Ctsz			Srd5a2	Fgg			Hmga1	1	Rreb1	3	Rgs3	2	Kcnmb1	1
	Tjp2	2310067B10Rik	Rtn4r			Hnrpll	Fga			Hmgb4	1	Rpn1	3	Rgs6	2	Kcnq3	1
	AK006114	Trim65	Ndufa10			Slc8a1	D930015E06Rik			Hmgx2	1	Rpl39l	3	Rhbdf2	2	Kcnq4	1
	mat-4	Prpsap1	Btd			Socs5	PE1			Hnf1b	1	Rpl38	3	Rin3	2	Kcp	1
	Ndufc1	Ptdsr	Baiap2l1			AK007204	Mef2d			Hnt	1	Robo2	3	Robo1	2	Kctd12	1
	Arhgef2	mKIAA1453	Ndufb4			Map3k8	Pogz			Hs2st1	1	Rnf168	3	Ror1	2	Kctd15	1
	Fndc7	C1qtnf1	Haghl			Rbbp8	AK020406			Hs3st3a1	1	Rit2	3	Rps16	2	Kctd21	1
	Dlgap3	D11Bwg0517e	Asb9			Zfp521	AK145276			Hscb	1	Ring1	3	Rps6kc1	2	KIAA0150	1
	mKIAA0842	Bahcc1	Pdss2			Cdh2	Reg4			Hsd17b6	1	RGS9	3	Rsrc1	2	Kiaa0819	1
	Klf3	Aspscr1	Cdadc1			Dsg1c	Hmgcs2			Htra1	1	Rgs6	3	Rtn4rl1	2	Kif14	1
	Wbscr18	Fasn	2310065K24Rik			Zfp191	Hao3			Hydin	1	Rgl3	3	Rxfp1	2	Kif1b	1
	Kl	Ccdc57	Iqce			CS444494	Slc22a15			Ibsp	1	Rfx3	3	Sacs	2	Kif21b	1
	3321401G04Rik	Ncoa1	Med25			AK076658	Ngfb			Id2	1	Rere	3	Sall1	2	Kif5c	1
	DQ555193	Itsn2	Sucnr1			AK076809	Trim33			Idh1	1	Reln	3	Sall3	2	Kit	1
	Capza3	AK146888	Slc34a3			Tslp	6530418L21Rik			Ifi27	1	Rdh10	3	Samd14	2	Kitl	1
	AK156678	Apob	Gpha2			AK160850	Gstm6			Ifng	1	Rbms3	3	Sc5d	2	Klf13	1
	Zfp607	Matn3	Trhr2			Pura	Prpf38b			Igf2r	1	Rbm9	3	Scap	2	Klhdc8a	1
	Lgals7	Greb1	Rab31			Slc4a9	Dpyd			Igsf11	1	Rbm12b	3	Scara5	2	Klhl2	1
	Ppp1r14a	Grhl1	Lsm10			Ndfip1	2510027J23Rik			Igsf21	1	Rasl11a	3	Scp2	2	Klhl7	1
	Gpatch1	Rnf144a	Rad9b			mKIAA1317	Tmem56			Igsf6	1	Rapgef5	3	Sctr	2	Krc	1
	AI480556	AK163447	Atp1a3			Pou4f3	Dnttip2			Igsf9	1	Rapgef2	3	Sdsl	2	Krt25	1
	Trpm4	Pxdn	B230396O12Rik			Lvrn	AK016661			Ihpk3	1	Rag1	3	Sec14l4	2	Krt32	1
	Pkn1	Sntg2	Coro2b			AK020276	BC100480			Ikzf3	1	Rab32	3	Sec16b	2	Krt5	1
	FuK	Atxn7l4	D630044L22Rik			EG433182	Ank2			Il10rb	1	Rab11fip2	3	Sema4g	2	Krt80	1
	4632417N05Rik	mKIAA0744	Glt1d1			AK018880	FAE			Il1r1	1	Pvrl3	3	Sema5b	2	Krtap17-1	1
	Filip1	Ahr	Zfp3			Prr16	Rpl34			Impa2	1	Ptpru	3	Sepp1	2	Ksr2	1
	Nphp3	AK018624	Thra			1700065I17Rik	Lef1			Insig1	1	Ptprk	3	Sepx1	2	Ky	1
	AK050201	Scin	Arrb1			Fbn2	Cyp2u1			Iqca	1	Ptprj	3	Sergef	2	Lama2	1
	Sgk3	Immp2l	Rya3			Pmaip1	Ppp3ca			Irf2	1	Ptger4	3	Serpina10	2	Large	1
	Efhc1	Sip1	Brd4			Impa2	H2afz			Itga6	1	Ptafr	3	Serpina12	2	Lat2	1
	AK138554	Pygl	Zdhhc19			Mc2r	Adh4			Itga9	1	Prx	3	Serpina1a	2	Lct	1
	Ogfrl1	2700049A03Rik	Flrt1			Ccdc68	Gbp5			Itgav	1	Prss23	3	Serpina1c	2	Ldlrad3	1
	Col9a1	AK050197	Gtl2			Smad7	Gtf2b			Itgb6	1	Prph2	3	Serpina1e	2	Ldoc1l	1
	4931428L18Rik	Daam1				Zbtb7c	Lmo4			Itsn1	1	Prox1	3	Serpina6	2	Lepr	1
	Tesp1	mKIAA4006				Setbp1	Clca6			Iws1	1	Prkg1	3	Serpinc1	2	Lfg	1
	Ankrd39	Syne2				AK046168	2410019A14Rik			Jam2	1	Pramel1	3	Sftpd	2	Lgals1	1
	Zap70	Mthfd1				NR_002886	Bcl10			Jph3	1	Ppp3ca	3	Sgms2	2	Lgals8	1
	Map4k4	AK133227				AK156842	Ttll7s			Jph4	1	Ppp1r3b	3	Sh3bp4	2	Lgmn	1
	1700019D03Rik	Plekhg3				Tshz1	Lphn2			Katnal1	1	Plxdc1	3	Shb	2	Lhcgr	1
	1700019A02Rik	Actn1				Cis4	AK139864			Kbtbd8	1	Plscr1	3	Shmt1	2	Lias	1
	AK184873	Smoc1				AK077035	Slc44a5			Kcnb1	1	Pls3	3	Sipa1l2	2	Limk2	1
	Speg	Sipa1l1				BC014805	Negr1			Kcnip2	1	Plk2	3	Sirt5	2	Lin7a	1
	Rhbdd1	1110018G07Rik				AK048878	Tgs1			Kcnma1	1	Plekhf2	3	Skil	2	Lipn	1
	A530032D15Rik	Flvcr2				Stxbp3b	Car8			Kcnn4	1	Plekhc1	3	Slain2	2	Lmna	1
	Spata3	Ttll5				Cep78	2610301B20Rik			Kctd9	1	PLC-epsilon	3	Slc12a7	2	Lmnb2	1
	Rbm44	Gstz1				AK048429	Trp53inp1			Kiaa0575	1	Pkp2	3	Slc13a4	2	Lmo3	1
	Farp2	Nrxn3				Vps13a	Fsbp			Kiaa0819	1	Pitpnc1	3	Slc17a3	2	Lmo6	1
	D2hgdh	AK132687				BC016495	Cdh17			KIAA1447	1	Pik3c3	3	Slc25a13	2	Lmo7	1
	Vps4b	Ston2				5730446C15Rik	Rbm12b			Kif13b	1	Pigz	3	Slc25a25	2	Lmtk2	1
	Rnpep	Ptpn21				AK077070	Atp6v0d2			Kif1c	1	Phldb1	3	Slc25a26	2	Lmx1a	1
	AK006139	AK046740				Gm967	AK136028			Kif3b	1	Phc1	3	Slc25a33	2	Lnx2	1
	1700012A16Rik	Trip11				E030010A14Rik	Klhl32			Kif5a	1	Pfkp	3	Slc27a2	2	LOC100039945	1
	Tnn	Itpk1				AK076909	BC024582			Kif5c	1	Pfdn4	3	Slc2a9	2	Loh12cr1	1
	Mpzl1	Serpina10				AK086959	Ifnk			Kirrel3	1	Peg3	3	Slc38a3	2	Lonp2	1
	Mael	Serpina1b				AK016336	1700009N14Rik			Klc4	1	Pecam1	3	Slc44a1	2	Lrfn2	1
	mFLJ00267	Serpina1c				Trpd52l3	AK016961			Klf10	1	Pdzrn4	3	Slc45a3	2	Lrig1	1
	Olfr420	Serpina12				Sgms1	2310040A07Rik			Klf13	1	Pdzd7	3	Slc46a1	2	Lrpap1	1
	Smyd3	Serpina3n				6530404N21Rik	1700022I11Rik			Klf7	1	Pdzd6	3	Slc6a13	2	Lrrc27	1
	Ephx1	AK015628				Mphosph1	D4Wsu132e			Klhdc5	1	Pdss2	3	Slco2a1	2	Lrrc28	1
	D1Pas1	1600002O04Rik				Sfxn3	Shb			Klhl10	1	Pdha2	3	Slco2b1	2	Lrrc7	1
	Ush2a	AK017440				Sh3pxd2a	Xpa			Klhl24	1	Pde7b	3	Smad1	2	Lrrc9	1
	Flvcr1	Wdr20a				Ins1	inv			Klk1b5	1	Pde4dip	3	Smarcd3	2	Lrrk1	1
	AK021325	Rcor1				Adrb1	5730528L13Rik			Krba1	1	Pde1a	3	Smoc1	2	Lrrtm4	1
	mKIAA1756	Traf3				AK019620	AI427809			Lace1	1	Pcolce2	3	smoc2	2	Lrtm1	1
	Esr1	Klc1				AK040090	Slc44a1			Lactb	1	Pccb	3	Snag1	2	Lsm10	1
	AK139890	Adssl1				1700011F14Rik	Klf4			Lamb1-1	1	Pard3	3	Sncaip	2	Lsm14a	1
	3110003A17Rik	mKIAA0387				AK006852	AY512912			Laptm5	1	Papolg	3	Sorbs1	2	Lsm14b	1
	1700020N01Rik	Larp5				Nebl	Ptpn3			Larp5	1	Pamci	3	Sord	2	Ltbp3	1
	Taar1	Heatr1				Armc3	AK084362			Lbr	1	Palm2	3	Sox5	2	Ltbr	1
	Akap7	Edaradd				AK188320	Mup4			Lcmt1	1	Paip2b	3	Sp3	2	Lycat	1
	A630077B13Rik	Lyst				Ttf1	OTTMUSG00000007485			Ldhb	1	Pafah2	3	Sphk2	2	Lynx1	1
	BC021785	Cdc2l5				Ier5l	Kif12			LDLB	1	Pabpc5	3	Spred-2	2	Lypd3	1
	AK017620	Amph				Cstad	Tnfsf15			Ldlrad3	1	Pabpc2	3	Srbd1	2	Lyst2	1
	Dux	Slc17a2				Ggta1	mKIAA0634			Lemd2	1	P2ry2	3	Srebf2	2	Mafb	1
	EG245263	Lrrc16				AK210662	AK083054			Leprel1	1	Oxsm	3	Srrm1	2	Man1a	1
	AY255578	Cmah				AK135703	Adamtsl1			Letm1	1	Otop1	3	Ssbp3	2	Map3k13	1
	AK044689	AK172386				Acvr2a	AK015482			Lfg	1	Osmr	3	Stab1	2	Map3k4	1
	Slc16a9	Agtr1a				Rbm43	AK086602			Lgmn	1	Osbpl10	3	Stab2	2	Map3k5	1
	Ube2d1	1300014I06Rik				Nmi	mKIAA1439			Lhfpl2	1	Osbp2	3	Stard10	2	Map3k7ip1	1
	Zfp280b	AK132729				Galnt5	AK002663			Lhx3	1	Oprm1	3	Stard13	2	Map4k2	1
	Icosl	Fam50b				Baz2b	Pde4b			Lig3	1	Opcml	3	Ston2	2	Mapk10	1
	Slc1a6	AK141540				Fap	Usp24			Lima1	1	Opa1	3	Stx18	2	Mapk14	1
	Madcam1	Cdyl				1110059H15Rik	Scp2			Lingo2	1	Oog4	3	Sucla2	2	Mapk8ip1	1
	Mbd3	Lyrm4				Mettl8	2010305A19Rik			Llgl1	1	Olig1	3	Sulf2	2	Max	1
	Btbd2	Fars2				Cybrd1	Rad54l			Lmo2	1	Olfr686	3	Sumf1	2	Mbip	1
	Gng7	Nedd9				B230120H23Rik	1110020C03Rik			Lmo7	1	Olfr315	3	Suv420h1	2	Mbp	1
	Nfic	9530008L14Rik				AK019889	Foxo6			Lmod1	1	Olfr1324	3	Svil	2	Mc2r	1
	Sirt6	AK135068				AK199495	Kcnq4			Lmx1a	1	Olfm4	3	Sync	2	Mcam	1
	Ankrd24	Hivep1				Zc3h15	Macf			Lnx2	1	Olfm2	3	Synj2	2	Mcm10	1
	AK018959	Mylip				Calcrl	Rragc			LOC100041724	1	Ofcc1	3	Sys1	2	Med13l	1
	Gnptab	Gmpr				Ptprj	AK132134			LOC100043868	1	Nudt4	3	Taok3	2	Med25	1
	Sycp3	Atxn1				Nup160	Utp11l			LOC634428	1	Nucb2	3	Tat	2	Med27	1
	Ccdc38	Cap2				Lrrc4c	Inpp5b			Loxl4	1	Ntrk2	3	Tbc1d8	2	Meis1	1
	AK087886	Bicd2				B230118H07Rik	Zscan20			Lpin1	1	Ntng1	3	Tbl1xr1	2	Metrn	1
	D10Ertd322e	Ror2				D430041D05Rik	Trim62			Lpp	1	Ntn1	3	Tcerg1l	2	Mex3c	1
	4921510H08Rik	AK006343				AK138215	1700125D06Rik			lpr	1	Nt5c1b	3	Tcf7l2	2	Mfap3l	1
	Galnt4	BC040758				Mett5d1	AK054442			Lrig1	1	Nrxn3	3	Tcte2	2	mFLJ00022	1
	Csl	Pcbd2				AK144367	Ptpru			Lrp2	1	Nrip1	3	Tcte3	2	mFLJ00177	1
	Alx1	Ntrk2				Hao1	Fgr			Lrp4	1	Nrg3	3	Tdrd1	2	Mfsd1	1
	AK144843	Dapk1				AK042765	Ahdc1			Lrpprc	1	NR_002928	3	Tectb	2	Mgat3	1
	AK145303	Fbp1				AK086556	4732473B16Rik			Lrrc55	1	NR_002860	3	Tex2	2	Mgat5	1
	AK015773	apo				OTTMUSG00000015730	Syf2			Lrrc61	1	NR_002849	3	Tfdp1	2	Mgat5b	1
	Msrb3	Hsd17b3				Tcf15	Runx3			Lrrc8d	1	Npr2	3	Tgfbi	2	Mgl1	1
	4930505D03Rik	Slc35d2				Myh7b	1110049F12Rik			Lrrc8e	1	Npnt	3	Tgfbr2	2	Mier2	1
	D930020B18Rik	Zdhhc11				Myl9	E2f2			Lrrfip1	1	Nphp4	3	Tgm2	2	Minpp1	1
	Lrig3	Ell2				Gm826	Ephb2			Lrriq2	1	Nphp3	3	Thada	2	Mip	1
	AK005576	Tmem161b				B4galt5	Eif4g3			Lrrk1	1	Npepl1	3	Thap1	2	mKIAA0134	1
	Arhgap9	Rasgrf2				AK040674	Pla2g2a			Lrrn2	1	Notch3	3	Thrb	2	mKIAA0148	1
	Ankrd52	Dmgdh				Bcas1	AK014098			Lrrtm1	1	Nol5	3	Thrsp	2	mKIAA0281	1
	Pla2g3	Lhfpl2				Mc3r	Pax7			Lsm6	1	Nmur1	3	Tle3	2	mKIAA0327	1
	Smtn	Pde8b				Tcfap2c	Arhgef10l			Lsp1	1	Nlrx1	3	Tm4sf4	2	mKIAA0338	1
	Hormad2	Col4a3bp				Hnf4g	AK213749			Lypd1	1	Nlrp10	3	Tm6sf1	2	mKIAA0351	1
	Emid1	Utp15				AK016002	Gm693			Lyzl1	1	Nhlh2	3	Tmcc3	2	mKIAA0387	1
	Mrps24	Mccc2				AK048280	Ddi2			Maf	1	Nfkb2	3	Tmem112	2	mKIAA0397	1
	Zmiz2	Naip1				Car13	Casp9			Mafk	1	Nfib	3	Tmem117	2	mKIAA0545	1
	AK087392	Ocln				LOC751864	Efhd2			Magi1	1	Neil3	3	Tmem28	2	mKIAA0578	1
	4930430E16Rik	Mast4				AK217986	AK154034			Mal	1	Ndufs1	3	Tmem50a	2	mKIAA0833	1
	AK019722	Sgtb				Gyg	AK170464			Man1a	1	Nat1	3	Tmem56	2	mKIAA0842	1
	Psme4	2410002O22Rik				DQ557323	Kif1b			Map2k2	1	Napg	3	Tmem57	2	mKIAA1070	1
	AK158233	Arl15				Spata16	H6pd			Map2k5	1	Mypn	3	Tnks2	2	mKIAA1102	1
	Foxi1	AK015520				Gnb4	Gpr157			Map2k6	1	Myom2	3	Tns3	2	mKIAA1124	1
	AK145334	Itga2				AK031919	Eno1			Map3k14	1	Myo3a	3	Tor1a	2	mKIAA1125	1
	Rnf145	Abhd6				Dcun1d1	Uts2			Map3k7	1	Myo15	3	Tpst2	2	mKIAA1158	1
	Cyfip2	Ptprg				trp3	Camta1			Mapk14	1	Myh7b	3	Tram2	2	mKIAA1358	1
	Olfr1395	Slc4a7				mKIAA1371	AK017048			Mapk4	1	Myh14	3	Trib1	2	mKIAA1635	1
	Rasgef1c	Rarb				Il21	Chd5			Mapk9	1	Mycn	3	Trim29	2	mKIAA1643	1
	Rufy1	Thrb				AK016393	AK135377			Mapkapk3	1	Mvk	3	Trp53inp1	2	mKIAA1672	1
	Zfp354b	1810063B07Rik				Phf17	AK131834			Marveld2	1	Muc3	3	Trrap	2	mKIAA1889	1
	AK016813	Myst4				Slc7a11	B230396O12Rik			Mast4	1	Mtx2	3	Tspan4	2	mKIAA1896	1
	Ube2b	Dupd1				AK145396	Nadk			Mat2a	1	Mtnr1b	3	Ttc13	2	mKIAA1902	1
	Vdac1	AK153491				Lhfp	Akap9			Mat2b	1	Msx1	3	Ttc29	2	mKIAA1914	1
	Hspa4	AK146230				8030451K01Rik	Sema3d			Mbnl2	1	Msr1	3	Ttc7	2	mKIAA1921	1
	AK038603	Arhgef3				Siah2	Galntl5			Mcart1	1	mSox5L	3	Tube1	2	mKIAA4026	1
	4930404A10Rik	Erc2				Mme	Hadhb			Mccc2	1	Mrc2	3	Ubb	2	mKIAA4119	1
	4930504O13Rik	Evi27				Veph-A	AK035444			Mcf2l	1	Mns1	3	Ugt1a5	2	mKIAA4247	1
	Olfr216	Itih4				1110032A04Rik	AK189432			Mcoln2	1	Mmrn2	3	Upb1	2	Mkl1	1
	A230051G13Rik	Pbrm1				Bche	Plb1			Mcts2	1	Mmd	3	Upp2	2	Mll2	1
	Glp2r	Msmb				D630023B12Rik	4933407H18Rik			Mdga2	1	mKIAA4044	3	Uqcc	2	MMET-1	1
	Wdr16	Ldb3				Tmem144	BC037112			Mdm1	1	mKIAA1680	3	Uroc1	2	MmKIF17	1
	Zbtb4	Plekhc1				Sfrp2	Adra2c			Med13l	1	mKIAA1376	3	Usf2	2	Mmp21	1
	Acadvl	C130032J12Rik				Rptn	Psapl1			Med24	1	mKIAA1296	3	Uvrag	2	Mod1	1
	Tm4sf5	Rnase4				Them4	Sorcs2			Med25	1	mKIAA1294	3	Vav2	2	Mon2	1
	6330403K07Rik	Ndrg2				AK006075	Cno			Megf11	1	mKIAA1070	3	Vcl	2	Mpdz	1
	Spata22	Dhrs2				Chd1l	Mrfap1			meis2a	1	mKIAA0842	3	Vps37d	2	Mpg	1
	Olfr398	Wdr23				Slc22a15	Stx18			mel1	1	mKIAA0776	3	Vtn	2	Mpo	1
	Nlk	Pspc1				Ngfb	Slc2a9			Mett10d	1	mKIAA0629	3	Wdfy4	2	Mrgprh	1
	Rab11fip4	Zmym5				Bcas2	Cd38			Mettl1	1	mKIAA0569	3	Wdr23	2	Mrps10	1
	1700071K01Rik	Sacs				EG433634	AK149205			Mettl9	1	mKIAA0545	3	Wdr45l	2	Mrps23	1
	Accn1	Rnaseh2b				Palmd	AK076918			mFLJ00022	1	mKIAA0044	3	Wdr51a	2	Mrps28	1
	1700020L24Rik	Kif13b				AK042746	Ldb2			Mfsd2	1	Mettl8	3	Wdr51b	2	Mrps6	1
	Med13	Zfp395				Pde5a	AK017706			Mfsd4	1	Meis1	3	Wdr7	2	Msi1	1
	Tex14	Scara5				BC025067	Sod3			Mgat5	1	Me3	3	Wdr91	2	mSox5L	1
	Dynll2	Adam2				Sec24b	Pi4k2b			Mgat5b	1	Mdga1	3	Whsc1l1	2	Msra	1
	Col1a1	Ephx2				Lef1	AK087045			Mgmt	1	Mc4r	3	Wwc1	2	Mtap1a	1
	Slc35b1	AK086749				Npnt	AK031770			Micall1	1	Mbnl2	3	Wwox	2	Mtap2	1
	AK078566	Piwil2				B930007M17Rik	Stim2			mKIAA0168	1	Mbl2	3	Xbp1	2	Mtap4	1
	Plxdc1	Bmp1				AK035466	Pcdh7			mKIAA0210	1	Mark1	3	Xpo1	2	Mtif3	1
	Pnmt	Hr				Lmo4	3110047P20Rik			mKIAA0338	1	Mapre2	3	Yy1	2	Mtx2	1
	Top2a	AK015316				Cyr61	Klf3			mKIAA0429	1	Mapk6	3	Zbtb24	2	Muc5ac	1
	Krt25	Cpb2				Lphn2	BC013481			mKIAA0439	1	Map4k4	3	Zbtb40	2	Muted	1
	Krt26	Diap3				AK133793	Limch1			mKIAA0515	1	Manba	3	Zc3h14	2	Mybpc3	1
	Krt27	Lmo7				EG381483	AK172090			mKIAA0545	1	Maml3	3	Zcrb1	2	Mybphl	1
	Krt40	Fbxl3				E130310K16Rik	AK079675			mKIAA0634	1	Mad2l1	3	Zfp217	2	Mylc2pl	1
	Plekhh3	Gpc5				Klhl32	C530008M17Rik			mKIAA0720	1	Lyz	3	Zfp324	2	myo 10	1
	Ccr10	Gpc6				Olfr275	Igfbp7			mKIAA0763	1	Lycat	3	Zfp395	2	Myo1b	1
	Rdm1	BC006662				AK019691	Slc4a4			mKIAA0804	1	Ly6e	3	Zfp407	2	Myrip	1
	AK076700	Fgf14				AI481877	Gc			mKIAA1124	1	Lsm14a	3	Zfp533	2	MysPDZ	1
	BC030867	Sepp1				RP23-257P7.3	Cox18			mKIAA1337	1	Lrrn2	3	Zfp536	2	Myst4	1
	Gm1564	Ghr				Cdk5rap2	Alb			mKIAA1371	1	Lrrk2	3	Zfp694	2	Napa	1
	Nsf	4921505C17Rik				AK039121	Cxcl1			mKIAA1549	1	Lrrc4c	3	Zfp809	2	Napor-1	1
	40612	Egflam				Ptprd	Ccng2			mKIAA1747	1	Lrig2	3	Znf710	2	Narg1l	1
	Tcam1	1110020G09Rik				Mpdz	Fras1			mKIAA1870	1	Lrfn3	3	Znf746	2	Ndufb4	1
	Gh	Skp2				Snapc3	Rasgef1b			mKIAA1998	1	Lrfn1	3	Zubr1	2	Nedl2	1
	Smurf2	Rai14				Bnc2	AK048739			mKIAA3005	1	Loxhd1	3	40606	1	Nek6	1
	Axin2	C1qtnf3				Dennd4c	AK050558			mKIAA3015	1	Lonrf2	3	40608	1	Nek7	1
	Myo15b	mKIAA1682				Dmrta1	Hnrpd			mKIAA3017	1	Lmnb1	3	0610008F07Rik	1	Neo1	1
	Itgb4	BC100491				Zfp352	BC062109			mKIAA4009	1	Lipt1	3	0610009K11Rik	1	Nes	1
	Mxra7	AK139483				AK005867	Sec31l1			mKIAA4026	1	Lingo2	3	0610010O12Rik	1	Neu2	1
	AK047272	BC052328				Jun	DQ556350			mKIAA4191	1	Lin7a	3	0610040J01Rik	1	Nfam1	1
	1110012N22Rik	Dnahc5				AK079280	Aff1			Mlc1	1	Limch1	3	0910001A06Rik	1	Ngef	1
	4921530G04Rik	40608				Foxd3	BC094509			Mll1	1	Lef1	3	1100001G20Rik	1	Nisch	1
	Zfp750	Pop1				Ube2u	Ulk1			Mlstd2	1	Ldoc1l	3	1110002B05Rik	1	Nlgn1	1
	Ptchd3	Ankrd46				Usp24	Mn1			Mon1b	1	Lce1a1	3	1110003E01Rik	1	Nmt1	1
	Kif3c	Wdsof1				Ptprf	C130026L21Rik			Morc3	1	Lbh	3	1110007L15Rik	1	Nova1	1
	Adcy3	Dpys				Cited4	Sez6l			Moxd1	1	Lat2	3	1110015M06Rik	1	Nova2	1
	BC067010	Eif3h				Ak2	AK077135			Mpped2	1	Lass3	3	1110018G07Rik	1	Npc1l1	1
	AK043922	Ext1				AK020914	Adrbk2			Mrc2	1	Ksr2	3	1110020C03Rik	1	Npcd	1
	Slc7a15	mKIAA0429				Ptpru	2900026A02Rik			Mreg	1	Kprp	3	1110020G09Rik	1	Nphp4	1
	Matn3	AK179413				Myom3	AK196542			Mrgpre	1	Klk5	3	1110031B06Rik	1	Npsr1	1
	Hbp1	0910001A06Rik				Cnr2	Acacb			Mrpl1	1	Klk15	3	1110049F12Rik	1	Nqo1	1
	Ppp2r3c	Kcnq3				Rpl11	Foxn4			Mrpl12	1	Klhl32	3	1190002A17Rik	1	NR_002846	1
	Aldoart2	Ptk2				Casp9	Myo1h			MRPS11	1	Klhdc5	3	1190003J15Rik	1	Nr3c2	1
	Slc25a21	Gpr20				AK018156	AK049264			Mrps36	1	Klb	3	1200011M11Rik	1	NrCAM	1
	Spg3a	Gm628				OTTMUSG00000010671	Suds3			Mrto4	1	Kl	3	1300002K09Rik	1	Nrd1	1
	AK015079	Hsf1				Fbxo2	Ksr2			Msi2	1	Kitl	3	1300014I06Rik	1	Nrp1	1
	Churc1	Rbm9				Casz1	2410131K14Rik			Mta3	1	Kif21a	3	1300017J02Rik	1	Nrxn2	1
	AK082841	Txn2				Ajap1	AK035112			Mthfd2	1	Kif14	3	1500003O03Rik	1	Ntn1	1
	2410016O06Rik	Cacng2				5930403L14Rik	AK006202			Mtl5	1	Kif13a	3	1500016O10Rik	1	Ntrk2	1
	Rnf113a2	Pvalb				Gnb1	Rbm19			Muc1	1	Kctd15	3	1600002O04Rik	1	Nudt3	1
	Vash1	Pla2g6				ENSMUSG00000053178	Rpl6			Mxi1	1	Kcnq5	3	1600014C10Rik	1	Nup188	1
	Angel1	Maff				Steap4	Mapkapk5			myo 10	1	Kcnn4	3	1600021P15Rik	1	Nup210	1
	Tmem63c	Kcnj4				AK016172	Brap			Myo10	1	Kcnn3	3	1700001C19Rik	1	Nwd1	1
	Lgmn	Grap2				AK186650	Cutl2			Myo5b	1	Kcnk2	3	1700007B14Rik	1	Nxn	1
	9030205A07Rik	Tnrc6b				Sema3a	Tect1			Myo7a	1	Kcnk18	3	1700008G05Rik	1	Nxnl2	1
	Gtl2	St13				Speer3	Gpr109a			Myo7b	1	Kcnk13	3	1700009N14Rik	1	Nxph3	1
	Traf3	Srebf2				Speer4f	Denr			Myom1	1	Kcnj2	3	1700011F14Rik	1	oasl10	1
	Zmynd11	Cyp2d26				Reln	Zfp664			Myoz3	1	Kcnj16	3	1700012H17Rik	1	Obscn	1
	AK203628	Scube1				Lhfpl3	Smrte			Myst1	1	Kcng4	3	1700018L24Rik	1	Odf1	1
	Hecw1	Pnpla5				Rheb	AK017106			Myst4	1	Kcnd2	3	1700019P01Rik	1	Odf3l1	1
	Hist1h2ba	Atxn10				Rab28	Fzd10			Nans	1	Kcnb2	3	1700020O03Rik	1	Ofcc1	1
	AK016580	AK041762				AK017756	Gpr133			Ncf2	1	Kcnb1	3	1700021F07Rik	1	Olfr510	1
	Hus1b	AW124722				AK006485	Sfrs8			Ncoa3	1	Irf8	3	1700022I11Rik	1	Olig1	1
	Eef1e1	1700019P01Rik				BC079612	Asl			Ncor2	1	Ipo8	3	1700023B02Rik	1	Opa3	1
	Tbc1d7	Lrrk2				AK021093	Eln			Ndfip2	1	Impg1	3	1700027N10Rik	1	Opcml	1
	Sirt5	Pphln1				9130005N14Rik	Cldn3			Ndnl2	1	Immp2l	3	1700029J11Rik	1	Orai1	1
	Zfp169	AK163711				AK007290	Rhbdd2			Ndrg1	1	Ildr1	3	1700030J22Rik	1	Os9	1
	Gm806	Sfrs2ip				Limch1	Por			Ndufa12l	1	Il8ra	3	1700040L02Rik	1	Osbpl10	1
	AK030238	Lfg				Tmem33	Cutl1			Ndufb8	1	Il13	3	1700041C02Rik	1	Osr1	1
	Nsd1	Tcfcp2				Atp8a1	Serpine1			Nebl	1	Il12a	3	1700071K01Rik	1	Otog	1
	BC020449	Slc4a8				Slain2	Ephb4			Nek11	1	Igha	3	1700120K04Rik	1	OTTMUSG00000015762	1
	Zcchc6	9430023L20Rik				mKIAA1458	BC028660			Nell1	1	Igfbp5	3	1700125D06Rik	1	OTTMUSG00000016790	1
	Gas1	AK043982				Rasl11b	Pdgfa			Neurl	1	Igfbp1	3	1810015C04Rik	1	Pacsin1	1
	EG328264	Nckap1l				Kit	Centa1			Nfatc1	1	Igf2bp2	3	1810033M07Rik	1	Padi1	1
	2010111I01Rik	Coro7				Anxa3	Gpr146			Nfatc2	1	Igf1r	3	1810055G02Rik	1	Padi2	1
	9630025I21Rik	A2bp1				AK080443	Micall2			Nfia	1	Ifltd1	3	1810063B07Rik	1	Palm	1
	Ahrr	Dexi				Antxr2	Mad1l1			Nfyc	1	Hspb3	3	1810073H04Rik	1	Parc	1
	AK200600	Litaf				AK076930	BC046508			Ngfb	1	Hsp25	3	2010001M09Rik	1	Pard6g	1
	Pde8b	4921513D23Rik				BC062109	Chst12			Nkx2-5	1	Hsf2bp	3	2010005J08Rik	1	Parp11	1
	S100z	Thap7				Ccdc98	E130309D02Rik			Nme7	1	Hsd17b11	3	2010012O05Rik	1	Pbx1	1
	F2r	Prodh				AK076906	Grid2ip			Nmnat3	1	Hs6st1	3	2010111I01Rik	1	Pbx4	1
	Sv2c	Cdc45l				Nkx6-1	Bri3			Nnt	1	Hrh4	3	2010301N04Rik	1	Pcbd1	1
	9330128J19Rik	Yeats2				Wdfy3	Baiap2l1			Nob1	1	Hrh1	3	2010305A19Rik	1	Pcdha4	1
	AK145614	Fetub				AK043904	Zfp498			Nol9	1	Hopx	3	2210021J22Rik	1	Pcnx	1
	Mast4	AK050351				AK030263	Cyp3a11			Notch1	1	Hnt	3	2210023G05Rik	1	Pcsk6	1
	4933425L06Rik	Lpp				AK006451	Gpr12			Notch2	1	Hnrpll	3	2210407C18Rik	1	Pctk2	1
	Dimt1	Tp73l				Sez6l	Usp12			Notch4	1	Hnrpd	3	2210421G13Rik	1	Pde10a	1
	Itga2	Cldn1				2900026A02Rik	Rpl21			Npl	1	Hmgn3	3	2310004N24Rik	1	Pde11a	1
	Il3ra	1600021P15Rik				AK049264	Mtif3			Npnt	1	Hmga2	3	2310005P05Rik	1	Pde2a	1
	AK029536	Lsg1				Ccdc60	Lnx2			NR_002846	1	Hist1h2aa	3	2310007F21Rik	1	Pde3a	1
	Myst4	AI480653				AK049160	Flt1			NR_002849	1	Hif1an	3	2310009E04Rik	1	Pde4d	1
	Il17rd	Dlg1				AK050700	Ubl3			NR_003283	1	Hells	3	2310026E23Rik	1	Pde4dip	1
	Ccdc66	Kalrn				Ksr2	Katnal1			NR_003293	1	Heg1	3	2310040A07Rik	1	Pdgfa	1
	Selk	Mylk				Rbm19	Hmgb1			NR_003523	1	Hecw2	3	2310061F22Rik	1	Pdgfc	1
	AK008341	Hspbap1				Bcl7a	Pds5b			NR_003620	1	Hecw1	3	2310067B10Rik	1	Pdhx	1
	AK007434	Hcls1				Scarb1	Ccdc132			Nr2f2	1	Hectd1	3	2400001E08Rik	1	Pdss2	1
	4922501K12Rik	Gtf2e1				Fzd10	Pon1			Nr4a3	1	Hebp1	3	2410001C21Rik	1	Pdxp	1
	Zfp488	Rabl3				Gpr133	C1galt1			Nrxn2	1	Hadh	3	2410002O22Rik	1	Pdzd2	1
	LOC100041724	4932425I24Rik				Sfrs8	Col28a1			Nt5c3l	1	Habp4	3	2410019A14Rik	1	Pdzd7	1
	Cdkn3	Pla1a				Gtf2ird1	Nxph1			Ntf3	1	H6pd	3	2410025L10Rik	1	Pebp1	1
	NR_002142	Lsamp				Zkscan1	Tmem106b			Ntn1	1	H2-Q2	3	2410116G06Rik	1	Pecam1	1
	Olfr750	Zbtb20				Stag3	AK052888			Ntng1	1	Gzmk	3	2410131K14Rik	1	Pef1	1
	EG638695	Nat13				Zfp157	Capza2			Ntrk2	1	Gsc	3	2510006C20Rik	1	Perp	1
	Slc39a2	Tomm70a				Chst12	Fam4a2			Nudt13	1	Grm8	3	2510027J23Rik	1	Perq1	1
	TCRA	Epha6				Rasl11a	Grm8A			Nudt7	1	Grm3	3	2600010E01Rik	1	Pex7	1
	4931414P19Rik	Stx19				Slc46a3	Dgki			Nup210	1	Grm2	3	2610018I03Rik	1	Pfas	1
	Ngdn	App				Slc7a1	Creb3l2			Obscn	1	Gripap1	3	2610024E20Rik	1	Pfkfb2	1
	Ap1g2	4921511H13Rik				AK036974	D630045J12Rik			Odz4	1	Grasp	3	2610301B20Rik	1	Pfkfb4	1
	1110028A07Rik	AK050735				4930588N13Rik	sco-spondin			Olfm1	1	Gprc2a-rs5	3	2700049A03Rik	1	Pfn2	1
	AK139063	C21orf63				DQ710622	Gimap3			Olfr1378	1	Gpr61	3	2810004N23Rik	1	Pftk1	1
	Pnoc	Rcan1				AK032180	Svs1			Olfr54	1	Gpr156	3	2810006K23Rik	1	Phactr1	1
	Gnrh1	AK007854				Nxph1	Mpp6			Onecut2	1	Gpr109a	3	2810021J22Rik	1	Phactr4	1
	D930020E02Rik	Morc3				Ndufa4	AK145307			Oplah	1	Gpr103	3	2810405J04Rik	1	Phf15	1
	Rbm26	Dyrk1a				Gpr37	AK002748			Opn4	1	Gpr1	3	2810408M09Rik	1	Phf19	1
	Trim52	Arid1b				AK165854	Nfe2l3			Osbpl6	1	Gpa33	3	2810451A06Rik	1	Phf21a	1
	AK015607	rsk3				Grm8	9430076C15Rik			Osbpl8	1	Gnrhr	3	2810485I05Rik	1	Phf6	1
	Nipbl	Plg				Snd1	BC044880			OSCP1	1	Gnb2l1	3	2900024C23Rik	1	Pi4k2b	1
	Slc45a2	Slc22a1				Jhdm1d	Znrf2			Osta	1	Gnas	3	3010026O09Rik	1	Pias4	1
	Acot10	Dact2				Snx10	Gars			Otof	1	Gm93	3	3110001A13Rik	1	Pigy	1
	Kcns2	smoc2				D430015B01Rik	AK039826			Otop1	1	Gm672	3	3110001I20Rik	1	Pik3c2b	1
	Oxr1	Dll1				V1rc15	Rpo1-4			OTTMUSG00000016790	1	Gm52	3	3110002H16Rik	1	Pik3cg	1
	Rad21	Gm317				Reep1	Tgoln2			Ovca2	1	Glt8d3	3	3110004L20Rik	1	Pik3r5	1
	NR_003368	Tmem112				Tmsb10	AK053994			Ovol1	1	Gli2	3	3110035E14Rik	1	Pip4k2a	1
	NR_003523	mKIAA1181				Ctnna2	Add2			Oxtr	1	Gkap1	3	3110047P20Rik	1	Pip5k1c	1
	Ly6k	4930539E08Rik				NR_002702	AK079912			p	1	Gja8	3	3110082I17Rik	1	Pisd	1
	Mapk15	AK144811				V1ra5	Asprv1			P7	1	Gja1	3	3300002A11Rik	1	Pitpnm3	1
	Nrbp2	9830134C10Rik				Trh	AK011997			Pabpn1	1	Giyd2	3	3322402L07Rik	1	Pkd1	1
	Galr3	Zfand3				AK007436	Antxr1			Pak4	1	Ghr	3	4631405J19Rik	1	Pkp1	1
	Pick1	Glo1				AK020861	Bmp10			Palm2	1	GFRalpha2	3	4631416L12Rik	1	Pla2g4b	1
	Slc16a8	Dnahc8				Foxp1	2010301N04Rik			Parp8	1	Gfra1	3	4632411B12Rik	1	Pla2g7	1
	Ddx17	Pknox1				Arl8b	Rab7			Pars2	1	Gdf6	3	4732473B16Rik	1	Plb1	1
	AW544981	Notch3				Edem1	Eefsec			Parvb	1	Gda	3	4831426I19Rik	1	Plcg2	1
	Cip85	Brd4				AK018979	AK029023			Pawr	1	Gcm1	3	4833409A17Rik	1	Plch1	1
	Dnajb7	Myo1f				Pparg	4933427D06Rik			Pax2	1	Gap43	3	4833418A01Rik	1	Plch2	1
	Rbx1	Rgl2				Iqsec3	C130022K22Rik			Pax3	1	Galnt7	3	4833446K15Rik	1	Plcl2	1
	mKIAA1835	Tap1				Klrg1	Adamts9			Pax8	1	Galc	3	4921505C17Rik	1	Plekha7	1
	C920005C14Rik	Pbx2				Aicda	Magi1			Pbx1	1	Gadl1	3	4921511H13Rik	1	Plekhh2	1
	Tcf20	Stk19				EG546913	Lrig1			PBX1a	1	Fzd8	3	4921513D11Rik	1	Plekhq1	1
	Ttll1	H2-Q10				Clstn3	AK156148			Pcdh7	1	Fut2	3	4921513D23Rik	1	Plk1	1
	Scube1	Ppp1r10				Kap	Frmd4b			Pck1	1	Frem2	3	4921517D21Rik	1	Plxdc1	1
	Sult4a1	Cyp39a1				Pde6h	Foxp1			Pcmtd1	1	Fras1	3	4921528O07Rik	1	Plxdc2	1
	Celsr1	Capn11				AK086149	AK051887			Pcnt	1	Foxp2	3	4921537P18Rik	1	Plxna2	1
	Zdhhc25	Mrpl14				Ifltd1	Sumf1			Pcnx	1	Foxp1	3	4930403L05Rik	1	Plxnb2	1
	BC048615	1700027N10Rik				Klhdc5	AK018979			Pcolce2	1	Foxo3a	3	4930485B16Rik	1	Pmfbp1	1
	Cpt1b	Tjap1				Ipo8	PMCA2			Pcsk5	1	Foxg1	3	4930505D03Rik	1	Pmm2	1
	AK082325	AK144536				AF365932	Vgll4			Pcsk6	1	Fmo2	3	4930517K23Rik	1	Pop4	1
	BC048643	Gnmt				Slc1a5	AK076253			Pdcd10	1	Fgf12	3	4930529M08Rik	1	Pou3f1	1
	Lrrk2	Tnrc5				Ppp5c	Pparg			Pde10a	1	Ffar1	3	4930539E08Rik	1	Ppap2a	1
	Cntn1	Kiaa0240				Lypd3	AK006540			Pde4d	1	Fath	3	4930547N16Rik	1	Ppargc1b	1
	AK135992	Trerf1				EG632778	Cacna1c			Pde7b	1	Fap	3	4930562D19Rik	1	Ppfia4	1
	H1fnt	9830107B12Rik				Cyp2s1	Dcp1b			Pdgfb	1	Exosc3	3	4930564B18Rik	1	Ppfibp2	1
	Olfr281	Treml4				AK048019	Erc1			Pdhb	1	Exoc4	3	4930590J08Rik	1	Ppl	1
	Tmprss12	Lrfn2				Capns1	Slc2a3			Pdhx	1	Evi1	3	4931408A02Rik	1	Ppm1h	1
	ENSMUSG00000058057	Satb1				Chst8	AK046349			Pdia5	1	evi-1	3	4932425I24Rik	1	Ppp1r16b	1
	BC035295	Ccdc94				Pdcd5	Ccnd2			Pdia6	1	Ethe1	3	4933400E14Rik	1	Ppp2r2a	1
	Galnt6	C3				Tshz3	Prmt8			Pdk2	1	Esr1	3	4933407C03Rik	1	Ppp2r5d	1
	Krt83	Gpr108				Klf13	Tspan9			Pdzd6	1	Esm1	3	4933407I18Rik	1	Ppp4r1	1
	Krt72	Fert2				AK007845	BC048546			Pdzk1ip1	1	Ephb3	3	4933413N12Rik	1	Prdm10	1
	Igfbp6	mKIAA4044				BC046251	Clec2d			Pea15b	1	Epha3	3	4933417O08Rik	1	Prdm16	1
	A2bp1	L3mbtl4				LOC384639	Etv6			Pepd	1	Epb4.1l3	3	4933422H20Rik	1	Prelp	1
	Myh11	Mylc2b				BC070425	Lrp6			Per2	1	Emilin2	3	4933424A20Rik	1	Prickle1	1
	P2rxl1	Ltbp1				AK020061	Pde6h			Perld1	1	Eif2ak4	3	4933427D06Rik	1	Prip	1
	AK086355	Rasgrp3				Agbl1	9830102E05Rik			Pex14	1	EG629219	3	4933428G20Rik	1	Prkce	1
	BC002163	2810405J04Rik				Zfp710	AK132719			Pfdn1	1	EG627132	3	4933439C20Rik	1	Prkcq	1
	Dppa4	Prkcn				Bnc1	Plekha5			Pfn3	1	EG56544	3	4933439F18Rik	1	Prkg1	1
	Cldnd1	Dhx57				Sh3gl3	AK004338			Phc1	1	EG546335	3	5031439G07Rik	1	Prkg1b	1
	AK019789	Map4k3				EG546981	AK086149			Phc2	1	EG432436	3	5033411D12Rik	1	Prmt3	1
	C21orf63	Haao				Aqp11	Sox5			Phf15	1	EG333669	3	5033413D22Rik	1	Prok2	1
	mKIAA0136	Thada				AK011524	AK008222			Phf17	1	Efhd1	3	5033414K04Rik	1	Prom2	1
	Tmprss2	Dync2li1				Psma1	Tuba3b			Phf20	1	Efcab5	3	5330421F07Rik	1	Prox1	1
	Synj2	Lrpprc				AK016343	Itpr2			Phldb1	1	Edg3	3	5430432M24Rik	1	Prr12	1
	2810051F02Rik	Svil				AK007112	Ceacam16			Pigh	1	E430018J23Rik	3	5730528L13Rik	1	Prr7	1
	Zfp206	Wac				AK019737	Zfp180			Pik3ap1	1	E330021D16Rik	3	5830472M02Rik	1	Psapl1	1
	1520401A03Rik	AK220484				Cdkn1c	Zfp111			Pik3c2g	1	E2f7	3	6030408B16Rik	1	Pscd2	1
	Ccnf	Gata6				AK042353	Pra1			Pik3r1	1	E2f3	3	6030408C04Rik	1	Psen1	1
	DQ566455	AK090336				2610019F03Rik	Pou2f2			Pim3	1	E130319B15Rik	3	6030419C18Rik	1	Psmb2	1
	Hmga1	lama3				Dlgap2	AK142847			Pip4k2a	1	E130112L23Rik	3	6030458C11Rik	1	Psmd4	1
	Pxt1	Orp1				Mcph1	Cyp2b10			Pip4k2b	1	Dtx3l	3	6030465E24Rik	1	Psmd9	1
	Mdga1	Mocos				1810011O10Rik	Cyp2b13			Pitx2	1	Dsg3	3	6330403A02Rik	1	Ptgis	1
	Morc2b	Brunol4				Gm1698	Cyp2a4			Pla2g5	1	Dscr3	3	6330512M04Rik	1	Ptk7	1
	Ring1	Iws1				Unc5d	Nlrp9c			Plau	1	DSC3	3	6430706D22Rik	1	Ptpn11	1
	Dom3z	2610024E20Rik				Fut10	mKIAA0545			Plcb4	1	DQ715521	3	6530418L21Rik	1	Ptpn3	1
	AK080258	Sil1				Rbpms	Cebpg			Pld1	1	DQ703057	3	7530404M11Rik	1	Ptprb	1
	H2-B2	AY227025				Tnks	Slc7a10			Plec1	1	DQ699365	3	8430406I07Rik	1	Ptprj	1
	H2-M10.1	0610010O12Rik				Cldn23	Tshz3			Plekha6	1	DQ696815	3	9030612M13Rik	1	Ptprn2	1
	Znrd1	Arhgap26				Dlc1	Klk14			Plekhg3	1	DQ689974	3	9030619P08Rik	1	Ptprs	1
	Rpo1-1	Sh3rf2				Tusc3	Fgf21			Plekhk1	1	DQ687803	3	9030624J02Rik	1	Ptprt	1
	Ttbk1	Ppp2r2b				Msr1	Csrp3			Plxnb1	1	DQ556157	3	9130014G24Rik	1	Ptrf	1
	Gnmt	Kcnn2				Zfp42	mKIAA3015			PMCA2	1	DQ547751	3	9130206N08Rik	1	Pxk	1
	Tnrc5	Trim36				Adam34	5330421F07Rik			Pols	1	Dok5	3	9230110C19Rik	1	Pygl	1
	Trerf1	Eif1a				Fat1	Cyfip1			Pou4f2	1	Dnm3	3	9330101J02Rik	1	Pygo1	1
	Unc5cl	Cdo1				Slc25a4	Ndnl2			Pou6f1	1	Dnajc5b	3	9430010O03Rik	1	Qscn6l1	1
	AK088204	Sncaip				AK144632	Pcsk6			Ppap2a	1	Dnajc1	3	9430022F06Rik	1	Rab10	1
	2310076L09Rik	AK165835				Enpp6	mKIAA1790			Ppap2b	1	Dnahc8	3	9430023L20Rik	1	Rab11fip2	1
	Fem1a	4833446K15Rik				AK029624	Aldh1a3			Ppara	1	Dlk1	3	9430038I01Rik	1	Rab11fip4	1
	Vav1	Ppargc1b				ten-m3	Lrrc28			Ppargc1a	1	Dlgap3	3	9430070O13Rik	1	Rab31	1
	AK139806	Pcyox1l				Aga	AK014683			Ppargc1b	1	Dlgap1	3	9430076C15Rik	1	Rab3c	1
	Lama1	Grpel2				Adam29	Igf1r			Pphln1	1	Diap3	3	9530008L14Rik	1	Rab6b	1
	Vit	Ablim3				Galnt7	LOC384639			Ppid	1	Dgat2l4	3	9530091C08Rik	1	Rabgef1	1
	Hnrpll	Wdr7				BC030500	AK020061			Ppm1b	1	Depdc1b	3	9630031F12Rik	1	Rabl4	1
	Gm941	D18Ertd653e				Aadat	DQ546052			Ppm1h	1	Denr	3	9630050M13Rik	1	Rad18	1
	AK020236	Mbd2				Mfap3l	Chd2			Ppp1cc	1	Defb30	3	9630058J23Rik	1	Rad51l1	1
	Plekhh2	Ccdc11				Spock3	Akap13			Ppp1r16b	1	Ddx19b	3	9830102E05Rik	1	Rad54l2	1
	AK007204	Acaa2				Tll1	Agbl1			Ppp1r3b	1	Ddx18	3	9830107B12Rik	1	Rad9b	1
	4921524J06Rik	Nfatc1				Tktl2	Slc28a1			Ppp2r2b	1	Ddo	3	9830123M21Rik	1	Ralgds	1
	Nrxn1	1810055G02Rik				Ints10	Btbd1			Ppp2r4	1	Ddi1	3	9830134C10Rik	1	Ranbp5	1
	2810439F02Rik	Suv420h1				AK138907	Mesdc1			Ppp2r5a	1	Dcn	3	9930013L23Rik	1	Rap1gap	1
	Psma8	Coro1b				Rasd2	AK032194			Ppp2r5c	1	Dchs1	3	A230074B11Rik	1	Rapgefl1	1
	Mocos	Spnb3				D630040G17Rik	Kctd21			Prkaca	1	Dcbld1	3	A230097K15Rik	1	Rara	1
	AK076658	AK149321				Otud4	AK170353			Prkar2a	1	Dbpht2	3	A230106M20Rik	1	Rarb	1
	Wdr36	Pygm				Hhip	Dgat2			Prkcd	1	Dbc1	3	A430060F13Rik	1	Rasl11a	1
	Srp19	Macrod1				Gab1	Mogat2			Prkce	1	Dact1	3	A430065P19Rik	1	Rbm14	1
	Wnt8a	Hrasls3				Inpp4b	Pold3			Prkci	1	Dab2	3	A630038E17Rik	1	Rbm24	1
	Cdc23	Asrgl1				Dnase2a	P2ry2			Prok2	1	D630040G17Rik	3	A730008H23Rik	1	Rbm5	1
	1700066B19Rik	Incenp				Phkb	Adm			Prtg	1	D1Pas1	3	A730085E03Rik	1	Rbms1	1
	Tmem173	Fads3				AK077163	mKIAA0750			Psap	1	D1Bwg1363e	3	A830023I12Rik	1	Rbpj	1
	Pcdha11	Fads2				Rpgrip1l	AK016028			Psapl1	1	D16Ertd472e	3	A930018P22Rik	1	Rbpms	1
	Pcdhb2	Fads1				DQ699365	Plekha7			Psen1	1	D15Ertd621e	3	AA536749	1	Rcan1	1
	AK149307	Dagla				Gnao1	Pik3c2a			Psma6	1	D10Ertd322e	3	Aadacl1	1	Ren1	1
	Pcdhga6	Psat1				Got2	Gp2			Psmd3	1	D030016E14Rik	3	AB041800	1	Ret	1
	Pcdhga9	Pcsk5				AK038730	Uqcrc2			Psph	1	Cyr61	3	Abca6	1	Rfx1	1
	Pcdhgb8	Trpm6				AK016594	Palb2			Pten	1	Cyp4f15	3	Abca7	1	Rgs6	1
	AK204365	BC044868				Cdh5	Rbbp6			Ptger3	1	Cyp3a41a	3	Abca8a	1	Rgs7bp	1
	AK016280	Klf9				Cdh1	Il4ra			Ptgs1	1	Cyp2s1	3	Abcc3	1	Rhbdd2	1
	Tnfaip8	Mamdc2				AK042944	Gtf3c1			Ptn	1	Cyld	3	Abcd3	1	Rims2	1
	Ftmt	Cd274				Zfp612	1500016O10Rik			Ptp4a2	1	Cugbp2	3	Abhd6	1	Rims4	1
	Csnk1g3	Gldc				Cntnap4	AK185421			Ptpn11	1	Ctnnd2	3	Ablim2	1	Rin2	1
	Synpo	1810073H04Rik				Wwox	Tial1			Ptpn13	1	Ctnna2	3	Ablim3	1	Rnf145	1
	AK087736	Sgms1				Maf	Brwd2			Ptpn14	1	Cstf2t	3	Abtb2	1	Rnf41	1
	AK136089	Minpp1				Mphosph6	AK007112			Ptpn3	1	CS444494	3	Acaa2	1	Rngtt	1
	Mppe1	Papss2				Gins2	Gpr26			Ptpre	1	Crygs	3	Acacb	1	Rora	1
	Hdhd2	Lipa				AK087264	Oat			Ptprg	1	Cryga	3	Acan	1	Rpap1	1
	Loxhd1	Ppp1r3c				Map1lc3b	B830028B13Rik			Ptprn2	1	Cpsf6	3	Acat3	1	Rph3a	1
	Mbp	Rbp4				2310079N02Rik	Tcerg1l			Ptprs	1	Cpa6	3	Accn1	1	Rpl14	1
	Unc93b1	Tmem20				Pard3	AK016032			Ptprt	1	Coro6	3	Accn5	1	Rpl34	1
	Gstp2	mKIAA1296				Pdgfd	Muc5ac			Ptpru	1	Coro2b	3	Aco1	1	Rplp1	1
	Rps6kb2	Pik3ap1				AK032746	6330512M04Rik			Pvrl3	1	Corl2	3	Acox1	1	Rps10	1
	Adrbk1	Mms19				Cntn5	Syt8			Pxdn	1	Commd8	3	Acox2	1	Rps6ka1	1
	Spnb3	Crtac1				Mtnr1b	Nadsyn1			Rab21	1	Commd3	3	Acsbg1	1	Rps6ka3	1
	Htatip	4833409A17Rik				AK006623	Shank2			Rab37	1	Col8a1	3	Acsl3	1	Rps6kc1	1
	1700060E18Rik	Got1				Pigyl	BC038349			Rab3gap2	1	Coch	3	Acsl4	1	Rras2	1
	Trpm6	Cutc				Bmper	AK053040			Rab3il1	1	Cntnap5a	3	Acsm3	1	Rspo2	1
	Insl6	Dnmbp				Npsr1	AK007416			Rab5c	1	Cntnap2	3	Acss2	1	Rsu1	1
	Trpd52l3	Cyp2c44				Tbx20	Arhgef18			Rabggta	1	Cndp2	3	Actg1	1	Rtdr1	1
	Plce1	Pax2				Tmem45b	Efnb2			Rac1	1	Clybl	3	Actn1	1	Rtp1	1
	Ccnj	Sema4g				Barx2	9430010O03Rik			Rad50	1	Clim1	3	Ada	1	Runx3	1
	Loxl4	Btrc				BC072643	AK047141			Rai1	1	Clic5	3	ADAM19	1	Ruvbl1	1
	AK049068	Arl3				AK142431	AK162519			Ralb	1	Clcn4-2	3	Adam2	1	Rwdd3	1
	AK035331	Sfxn2				BC048584	1700018L24Rik			Raly	1	ClaspL	3	Adamts14	1	Rxra	1
	Taf5	2010012O05Rik				Tecta	EG434280			Ramp3	1	Ckt2	3	Adamts18	1	Rya3	1
	BC057135	As3mt				Pafah1b2	Sox1			Rapgef3	1	Cited2	3	Adamts9	1	Rybp	1
	Pdcd4	Col17a1				4432416J03Rik	EG434280			Rapsn	1	Cis4	3	Adamtsl1	1	Ryk	1
	Tdrd1	BC063749				AI593442	Mcf2l			Rbbp6	1	Chst11	3	Adck5	1	Ryr2	1
	AI450540	AK158034				Paqr5	AK019250			Rbl2	1	Chst10	3	Adcy1	1	Sag	1
	C1ql3	Pdcd4				Spesp1	AK166824			Rbm17	1	Chordc1	3	Adcy9	1	Sall3	1
	AK044329	Gpam				Coro2b	BC035532			Rbm19	1	Chmp4b	3	Add2	1	Samd12	1
	Bmi1	Tcf7l2				Itga11	Plat			Rbm26	1	Chmp2b	3	Adh6-ps1	1	Samd7	1
	Arrdc1	Tdrd1				Smad6	Tacc1			Rbms3	1	Chl1	3	Adm	1	Sap25	1
	Fut7	Grk5				Foxb1	4921537P18Rik			Rbpj	1	Cdkn3	3	Adora1	1	Satb2	1
	AK007459	9630050M13Rik				Met	AK054526			Rcan3	1	Cdkn1c	3	Adora2b	1	Scd1	1
	1700007K13Rik	E130319B15Rik				Cgnl1	Rbpms			Rcor1	1	Cdh5	3	Adora3	1	Scgn	1
	Fbxw2	Camk1d				AK040357	D8Ertd82e			Rdh5	1	Cd9	3	Adprhl1	1	Scnn1g	1
	Olfr368	AK044786				Onecut1	AK076961			Renbp	1	Cd300lf	3	Adra2a	1	Scube2	1
	Rabgap1	Usp6nl				Cd109	Dlc1			Reps1	1	Cd209c	3	Adra2c	1	Sec23ip	1
	Itgb6	Sfmbt2				Phip	Fgf20			Rere	1	Cd163	3	Adrbk2	1	Sec24b	1
	Scn3a	Cubn				AK018214	Mtus1			Rerg	1	Ccrk	3	Adsl	1	Sec61b	1
	AK086439	Sardh				AK135132	AK015826			Rhobtb1	1	Ccin	3	Adssl1	1	Sel1l	1
	AK010824	Tsc1				Snap91	Cbr4			Rimbp2	1	Ccdc88b	3	Aff1	1	Sema4b	1
	Wipf1	1190002A17Rik				Zic1	Palld			Rin2	1	Ccdc83	3	Aff3	1	Sema4d	1
	4930430A15Rik	Ntng2				1700057G04Rik	Gdf15			Rit2	1	Ccdc28a	3	Afmid	1	Sema6a	1
	Fmn1	Prrx2				AK018841	Myo9b			Rmi1	1	Cbln2	3	Agbl1	1	Sema6b	1
	Mapkbp1	Ptges				Pcolce2	Ankrd41			Rnasen	1	Cblb	3	Agmat	1	Sephs1	1
	4930424G05Rik	Tor1a				Slc25a36	Unc13a			Rnf144b	1	Casp12	3	Agpat6	1	Serpina3b	1
	Slc24a5	Hmcn2				Pik3cb	AK186650			Rnf190	1	Car6	3	Agtr1a	1	Serpinf2	1
	Eid1	mKIAA0515				Pccb	Rbmxrt			Rnf207	1	Car5a	3	Ahcy	1	Setd6	1
	Adra2b	St6galnac6				Slco2a1	Smad1			Rnf43	1	Cap2	3	Ahdc1	1	Sfrs1	1
	1700010M22Rik	Eng				Osbpl10	Hhip			Rora	1	Camta1	3	Ahr	1	Sfrs6	1
	Xrn2	Sh2d3c				Gadl1	Il15			Rp1	1	Caln1	3	AI316807	1	Sfxn5	1
	Cst12	chat				Zcwpw2	Rln3			RP23-451A6.3	1	Cadm2	3	AI427122	1	Sgcz	1
	AK203176	Mapkap1				Higd1a	Lonp2			Rp23-45p4.1	1	C330005M16Rik	3	AI427809	1	Sh3bgrl2	1
	Snph	Hc				LOC631002	DQ699365			Rpl14	1	C230021P08Rik	3	AI480653	1	Sh3bp4	1
	AK006531	Ndufa8				EG434729	Csnk2a2			Rpl38	1	C21orf63	3	Aifm2	1	Sh3bp5	1
	Fkhl18	Lhx6				Bcor	AK042807			Rpl8	1	C130039O16Rik	3	Aig1	1	Sh3gl3	1
	Myh7b	Dennd1a				mKIAA1575	AK016594			Rplp1	1	C130038G02Rik	3	Aipl1	1	Sh3pxd2a	1
	Ergic3	Psmb7				Dusp21	D230025D16Rik			Rpn1	1	C130026L21Rik	3	AK002663	1	Sh3tc2	1
	4921517L17Rik	Lypd6				OTTMUSG00000017156	Zfp90			Rps19	1	C030003D03Rik	3	AK002748	1	Shf	1
	AK006839	AK142467				C1galt1c1	Cyb5b			Rps6	1	Bud13	3	AK003841	1	Shroom3	1
	Top1	Stam2				Gria3	Psmd7			Rps6ka2	1	Btg1	3	AK004338	1	Sidt2	1
	Svs5	Fmnl2				6330534C20Rik	AK042944			Rreb1	1	Bsn	3	AK005183	1	Slain2	1
	AK079019	Upp2				Mcf2	NR_002928			Rrn3	1	Boc	3	AK005833	1	Slc10a7	1
	OTTMUSG00000016293	Baz2b				4933402E13Rik	Tat			Rspo1	1	Bnip2	3	AK006114	1	Slc15a1	1
	Gm1008	Dpp4				Slitrk2	BC025546			Rufy4	1	Bmp7	3	AK006202	1	Slc1a2	1
	Eya2	Fign				Prrg1	Wdr59			Runx1t1	1	Bmp4	3	AK006264	1	Slc1a7	1
	Stau1	mKIAA0977				AK186650	Adamts18			Rxfp2	1	Best3	3	AK006331	1	Slc20a2	1
	BC042727	Scn3a				CN716893	Nudt7			Ryk	1	Bcng-1	3	AK006343	1	Slc22a21	1
	BC049717	Stk39				Mageb2	1700030J22Rik			Sacy	1	Bcmo1	3	AK006355	1	Slc24a3	1
	AK018940	Lass6				Gspt2	Cdh13			Sall3	1	Bcl6	3	AK006376	1	Slc24a4	1
	1700021F07Rik	Dhrs9				Spin4	Cotl1			Samhd1	1	Bcat1	3	AK006474	1	Slc25a12	1
	AK080176	A430065P19Rik				Ogt	AK209885			Sarm1	1	BC062185	3	AK006531	1	Slc28a3	1
	Npepl1	Myo3b				Fgf16	Gins2			Satb2	1	BC057135	3	AK006540	1	Slc2a6	1
	AK019836	Mettl8				Brwd3	AK087264			Sbf2	1	BC053749	3	AK006561	1	Slc34a3	1
	4930526D03Rik	Metapl1				Tgifx1	BC021611			Scamp2	1	BC050980	3	AK006570	1	Slc38a4	1
	Tnfsf10	Pdk1				Pcdh11x	AK076318			Scara5	1	BC048678	3	AK006664	1	Slc39a10	1
	Gpr103	AK019889				Tmem164	Disc1			Scarb1	1	BC048671	3	AK006831	1	Slc39a3	1
	AK043581	Sp3				Reps2	Sipa1l2			Scd2	1	BC030396	3	AK006921	1	Slc39a5	1
	Slc25a31	1700023B02Rik				Gemin8	Kcnk1			Scd3	1	BC030046	3	AK006930	1	Slc43a2	1
	AK021232	Pde11a				mKIAA1889	AK163095			Scfd2	1	BC026439	3	AK006942	1	Slc44a5	1
	Alg5	Zfp533				Sox17	AK050336			Scg2	1	BC025885	3	AK007112	1	Slc45a1	1
	mKIAA0610	Ctnnd1				Oprk1	Birc3			Scn4a	1	BC025816	3	AK007133	1	Slc4a4	1
	Mfsd1	Lrp4				AK087278	2810485I05Rik			Scn5a	1	BC003267	3	AK007290	1	Slc6a6	1
	Trim59	F2				AK142999	AK076733			Scube1	1	Baz2b	3	AK007351	1	Slc7a10	1
	B3galnt1	Ldlrad3				Rrs1	Olfm2			Sdcbp	1	Baiap2l1	3	AK007416	1	Slc7a14	1
	Nmd3	Elf5				A830018L16Rik	B230118G17Rik			Sdk2	1	Bach1	3	AK007854	1	Slc7a2	1
	Dcamkl2	Abtb2				Sulf1	Bmper			Sec31b	1	B930007M17Rik	3	AK007971	1	Slc9a8	1
	Cd1d1	AK083230				Ncoa2	Opcml			Sec61b	1	B3gat1	3	AK007998	1	Slit3	1
	Mex3a	Rasgrp1				Lactb2	Barx2			Secisbp2	1	B3galtl	3	AK008073	1	Smarcal1	1
	Rxfp4	AK048775				AK195788	Grit			Selenbp1	1	Axin2	3	AK008222	1	Smarcc1	1
	Lenep	1500003O03Rik				4933415F23Rik	Kcnj5			Sema3b	1	Atp6v1c1	3	AK008488	1	Smarcd3	1
	Il6ra	Pdia3				Smap1	AK048946			Sema4a	1	Atp5g3	3	AK008755	1	smoc2	1
	Flg	Sord				1110058L19Rik	Srpr			Sema4d	1	Atp10a	3	AK008767	1	Smpx	1
	Anp32e	mKIAA0912				Col19a1	Cdon			Sema5a	1	Art3	3	AK009597	1	Smurf1	1
	Pias3	Hdc				Atpase6	Olfr984			Sema7a	1	Armc3	3	AK011682	1	Smyd3	1
	Pde4dip	AK157218				AK050085	AK011865			Senp8	1	Arl6ip2	3	AK011865	1	Snai3	1
	Adam30	AK006376				Gm597	AK132154			Serac1	1	Arid5b	3	AK011879	1	Snap91	1
	Reg4	Hao1				AK188812	Grik4			Serpina3n	1	Arid5a	3	AK011997	1	Snx7	1
	Wars2	Macrod2				4930521A18Rik	AK052711			Serpinf1	1	Arhgap5	3	AK012007	1	Sorbs1	1
	4921525H12Rik	Rrbp1				Slm1	BC033915			Sertad2	1	Arhgap28	3	AK013380	1	Sorcs1	1
	4930443G12Rik	Slc24a3				Khdrbs2	Apoa5			Setd4	1	Arhgap24	3	AK013680	1	Sostdc1	1
	Pde5a	BC039771				B230209C24Rik	Bud13			Sez6	1	Arhgap15	3	AK013818	1	Sox10	1
	AK015409	Gins1				Ccdc115	AK049847			Sfxn5	1	Arg1	3	AK013876	1	Sox11	1
	Rpl34	Angpt4				DQ688885	Ncam1			Sgsm2	1	App	3	AK014098	1	Sox5	1
	Nhedc1	Trib3				Hs6st1	Fdx1			Sh3d19	1	Api5	3	AK014646	1	Sox8	1
	Manba	Mylk2				Lincr	Wdr61			Sh3pxd2a	1	Apba1	3	AK014683	1	Sparcl1	1
	Ppp3ca	Snta1				Tmem131	Trcg1			Sh3tc2	1	Antxr1	3	AK015063	1	Spata13	1
	H2afz	Ahcy				4921511C04Rik	Rpp25			Shank2	1	Ankrd38	3	AK015118	1	Spata16	1
	Ifi44	Acss2				Tsga10	Csk			Shc3	1	Als2cr11	3	AK015208	1	Spata18	1
	Gipc2	Cpne1				Lyg1	Hcn4			Shcbp1	1	Alpk3	3	AK015227	1	Spata20	1
	Rps20	Epb4.1l1				D1Bwg0212e	Pnr			Shroom3	1	Alcam	3	AK015289	1	Spata2L	1
	Rdhe2	Fam83d				Creg2	Thsd4			Si	1	Akna	3	AK015316	1	Spata5	1
	Rab2	L3mbtl				AK086013	Uaca			Sipa1l1	1	Akap6	3	AK015336	1	Spdef	1
	Chd7	Tox2				BC048628	Tle3			Ski	1	Akap14	3	AK015404	1	Spef1	1
	1700009N14Rik	D930001I22Rik				AK041998	Coro2b			Slain1	1	Akap12	3	AK015413	1	Spert	1
	A930001M12Rik	0610008F07Rik				Il1r2	Fem1b			Slc16a10	1	AK214683	3	AK015482	1	Spnb3	1
	B4galt1	Hnf4a				Mfsd9	Pias1			Slc16a14	1	AK186650	3	AK015493	1	Spred-2	1
	mKIAA0375	Ada				BC058417	AV340375			Slc16a9	1	AK173072	3	AK015520	1	Spred2	1
	5430416O09Rik	Neurl2				AK011913	Parp16			Slc20a2	1	AK158018	3	AK015526	1	Spry2	1
	Ppp3r2	Slc35c2				Nck2	Pif1			Slc22a1	1	AK157499	3	AK015566	1	Spsb1	1
	4930547C10Rik	BC067047				EG212225	DAPK2			Slc22a12	1	AK156678	3	AK015826	1	Src	1
	D530005L17Rik	AK077405				Myo1b	9530091C08Rik			Slc22a13	1	AK153590	3	AK015953	1	Srd5a2l	1
	4930500O09Rik	AK040674				Gls	Cgnl1			Slc23a2	1	AK147021	3	AK015956	1	Srebf2	1
	AK080222	Ptpn1				5330401P04Rik	Nedd4			Slc25a21	1	AK146861	3	AK016028	1	Srgap2	1
	Itgb3bp	Tshz2				AK038423	Wdr72			Slc25a25	1	AK144120	3	AK016032	1	SRPK1	1
	Jak1	Pfdn4				4930511H11Rik	Onecut1			Slc25a39	1	AK140089	3	AK016097	1	Srpr	1
	LOC381536	Dok5				AK041133	Gclc			Slc26a2	1	AK139806	3	AK016283	1	Srxn1	1
	Tctex1d1	Cstf1				Sf3b1	Elovl5			Slc26a5	1	AK138755	3	AK016377	1	Ssbp3	1
	Dmrtb1	2410001C21Rik				AK079812	Gsta1			Slc2a5	1	AK136028	3	AK016592	1	Ssh3	1
	Nrd1	Rbm38				AK046737	Cd109			Slc30a1	1	AK135960	3	AK016594	1	Ssx2ip	1
	Cyp4a30b	Tmepai				AK219417	AK135132			Slc30a10	1	AK135703	3	AK016661	1	St3gal1	1
	Guca2a	Rab22A				Ica1l	AK214583			Slc30a5	1	AK135691	3	AK016961	1	St3gal2	1
	Oxct2b	Ss18l1				Wdr12	Mthfs			Slc30a9	1	AK134636	3	AK017048	1	St6galnac4	1
	Oxct2a	Gata5				A430093A21Rik	Rasgrf1			Slc35b4	1	AK134426	3	AK017106	1	St8sia5	1
	DQ697509	Pxmp3				AK150559	AK043331			Slc35f3	1	AK133337	3	AK017148	1	Stac3	1
	OSCP1	Mrps28				Klf7	Xrn1			Slc39a11	1	AK132299	3	AK017440	1	Stard13	1
	Tekt2	AK076665				AK013046	Atp1b3			Slc44a5	1	AK132074	3	AK017586	1	Stard3nl	1
	Zmym6	Ect2				Mtap2	BC043934			Slc47a1	1	AK131834	3	AK017706	1	Stat4	1
	Csmd2	Aadacl1				Myl1	Clstn2			Slc4a3	1	AK090359	3	AK018624	1	Stk10	1
	BC039093	BC050868				AK014713	Nmnat3			Slc4a4	1	AK088579	3	AK018679	1	Stk24	1
	Adc	Slc2a2				AK049041	Rbp2			Slc5a4b	1	AK087725	3	AK018772	1	Stk3	1
	AK013162	Usp13				Igfbp5	Stag1			Slc6a18	1	AK087699	3	AK018847	1	Stk4	1
	Matn1	Fgf2				AK054265	AK015953			Slc6a19	1	AK087392	3	AK018959	1	Stmn2	1
	AK009175	Ccrn4l				Epha4	Ryk			Slc7a14	1	AK087209	3	AK018974	1	Strn4	1
	Wdtc1	Lhfp				Utp14b	Slco2a1			Slc7a9	1	AK085943	3	AK018976	1	Stxbp2	1
	AK015107	Spg20				Acsl3	1300017J02Rik			Slco2a1	1	AK085533	3	AK018979	1	Sucnr1	1
	nssr 1	Lyst2				Cul3	AK131742			Slit2	1	AK083706	3	AK019036	1	Sulf2	1
	E2f2	Med12l				mKIAA1486	Ccrl1			Smad3	1	AK082467	3	AK019250	1	Susd4	1
	BC029684	4631416L12Rik				chemokine LARC	AK033064			Smad4	1	AK082440	3	AK019420	1	Syn2	1
	Padi3	Kcnab1				Spata3	Wdr51a			Smad6	1	AK082432	3	AK019601	1	Syne2	1
	Necap2	Schip1				B3gnt7	Vprbp			Smad7	1	AK081271	3	AK019620	1	Syngr1	1
	Car6	Ppm1l				1700019O17Rik	Cacna2d2			Smarca4	1	AK081104	3	AK019752	1	Synj1	1
	Tnfrsf9	Bche				Efhd1	AK015404			Smyd3	1	AK080102	3	AK019789	1	Syt3	1
	2310058O09Rik	Golim4				Glrp1	Dag1			Sncaip	1	AK079675	3	AK019797	1	Syt7	1
	mKIAA0720	Rxfp1				AK019125	Prkar2a			Sntg2	1	AK079194	3	AK019838	1	Tacc1	1
	mel1	Fgg				Centg2	Cdc25a			Snx19	1	AK079018	3	AK019889	1	Tagln3	1
	Mmp23	Dclk2				AK036422	Cnot10			Snx29	1	AK076984	3	AK020061	1	Taok3	1
	BC099562	Kirrel				Twist2	Lnv			Snx30	1	AK076865	3	AK020095	1	Tas1r2	1
	Sri	Mef2d				Kif1a	AK161079			Sohlh2	1	AK076852	3	AK020406	1	Tas1r3	1
	AK076902	Ubqln4				Tmem157	Stt3b			Sorcs1	1	AK076831	3	AK021127	1	Tbc1d19	1
	Pmpcb	Il6ra				ST8SiaIV	AK039053			Sorcs2	1	AK076715	3	AK021325	1	Tbc1d5	1
	Psmc2	AK019752				D1Ertd622e	Myd88			Sox4	1	AK076658	3	AK027991	1	Tbx20	1
	Reln	Snx27				AK021003	Rpl14			Spcs3	1	AK054431	3	AK028077	1	Tbx4	1
	AK030448	Pi4kb				AK007349	AK019838			Spen	1	AK051771	3	AK029023	1	Tbx5	1
	AK088877	Vps45				Rnf152	Ctnnb1			Spesp1	1	AK051008	3	AK029587	1	Tcap	1
	Gm443	Otud7b				RANK	Lyzl4			Spink4	1	AK050349	3	AK029591	1	Tcerg1l	1
	Tcf23	Mtmr11				Vps4b	C85492			Spnb2	1	AK050283	3	AK029768	1	Tcf20	1
	Plb1	Cd160				Serpinb5	Kiaa0028			Spon1	1	AK049838	3	AK030453	1	Tcf25	1
	Ccdc96	Fmo5				Tsn	Atp6ap2			Spred-2	1	AK047946	3	AK031770	1	Tcof1	1
	Jakmip1	Notch2				Inhbb	Ddx3x			Spryd3	1	AK047857	3	AK032194	1	Tcte3	1
	6820424L24Rik	Reg4				En1	4930403L05Rik			Srd5a1	1	AK046316	3	AK033061	1	Tctn2	1
	AK087045	Hmgcs2				Rab3gap1	Atp1b4			Srebf2	1	AK045385	3	AK033064	1	Tdg	1
	Stim2	Gdap2				Dars	EG238829			Srfbp1	1	AK042843	3	AK033426	1	Tdrd9	1
	Tbc1d1	Fam46c				Daf2	Efnb1			Srgap1	1	AK041976	3	AK034539	1	Tec	1
	Tlr1	Casq2				Zp3r	Cited1			Srl	1	AK041614	3	AK035112	1	ten-m2	1
	Klb	Magi3				Mapkapk2	Prps1			Srrm1	1	AK040426	3	AK035444	1	Tex22	1
	Rhoh	Gstm4				Klhdc8a	Acsl4			Ssbp3	1	AK040104	3	AK035573	1	Tgm1	1
	Atp10d	Sort1				Tmcc2	Gpr64			Ssh1	1	AK039829	3	AK035711	1	Thop1	1
	Corin	Cdc14a				Ppp1r15b	Rbbp7			Sspn	1	AK039487	3	AK035774	1	Thra	1
	Srd5a2l	Palmd				Sox13	Egfl6			St14	1	AK039480	3	AK036329	1	Thrap2	1
	Arl9	Tmem56				Btg2				St3gal3	1	AK038827	3	AK036466	1	Thsd4	1
	Cenpc1	Abcd3				Rabif				St3gal6	1	AK038711	3	AK036632	1	Tiam2	1
	2310011G06Rik	AK016661				Atp6v1g3				St6galnac2	1	AK035515	3	AK036982	1	Tigd5	1
	AK015423	FAE				Crb1				Stard8	1	AK035211	3	AK038428	1	Timeless	1
	AK214072	Pla2g12a				Rgs1				Ston2	1	AK033245	3	AK038653	1	Tjp1	1
	Arhgap24	Cyp2u1				Rgs18				Stxbp3a	1	AK033170	3	AK038791	1	Tle1	1
	Abcg3	Dkk2				Hmcn1				Stxbp4	1	AK032387	3	AK038880	1	Tm4sf1	1
	Rpl5	Cenpe				Rnf2				Suclg2	1	AK029768	3	AK039036	1	Tm4sf4	1
	Pde6b	Manba				1700025G04Rik				Suds3	1	AK029643	3	AK039053	1	Tmc7	1
	Chfr	Dapp1				5730449L18Rik				Sulf2	1	AK021299	3	AK039361	1	Tmco7	1
	Pgam5	Adh6-ps1				Nmnat2				Surf2	1	AK020826	3	AK039373	1	Tmem109	1
	Sez6l	Bmpr1b				Cacna1e				Susd2	1	AK020496	3	AK039634	1	Tmem123	1
	Sirt4	Fubp1				AK029591				Syf2	1	AK019792	3	AK039826	1	Tmem130	1
	Ccdc64	C030011O14Rik				AK147021				Syn3	1	AK019774	3	AK039827	1	Tmem132b	1
	Fbxw8	St6galnac3				Ralgps2				Syne2	1	AK019752	3	AK039829	1	Tmem135	1
	Ppp1cc	Negr1				Rasal2				Syt13	1	AK019737	3	AK039960	1	Tmem161b	1
	Gpr81	Lyn				Rfwd2				Syt17	1	AK019697	3	AK040061	1	Tmem16a	1
	Slc15a4	1700012H17Rik				Rabgap1l				Syt6	1	AK019631	3	AK040320	1	Tmem16b	1
	Piwil1	Cyp7a1				AK218564				Syt9	1	AK019598	3	AK040684	1	Tmem178	1
	Phkg1	Tox				AK016179				Tac4	1	AK019563	3	AK041339	1	Tmem18	1
	Tpst1	Chd7				Dnm3os				Tacr1	1	AK019031	3	AK041461	1	Tmem26	1
	Tyw1	Trp53inp1				Dnm3				Tacstd1	1	AK018968	3	AK041531	1	Tmem33	1
	Caln1	AK080292				Slc19a2				Tada3l	1	AK018948	3	AK041570	1	Tmem65	1
	Gats	Otud6b				Pbx1				Taf2	1	AK018156	3	AK041628	1	Tmpo	1
	Srcrb4d	Ttpa				Ddr2				Taf4a	1	AK017239	3	AK041760	1	Tmprss11f	1
	Emid2	Bach2				1700009P17Rik				Tarsl2	1	AK017148	3	AK041762	1	Tnfrsf13c	1
	Zcwpw1	Pnrc1				Vangl2				Tas2r119	1	AK016413	3	AK042016	1	Tnfsf11	1
	Gje1	Aco1				Atp1a2				Tbc1d1	1	AK016128	3	AK042188	1	Tnfsf5ip1	1
	Stag3	B4galt1				Slamf8				Tbc1d14	1	AK016002	3	AK042235	1	Tnr	1
	Papolb	AK142614				Crp				Tbc1d22b	1	AK015891	3	AK042300	1	Tnrc6c	1
	Zfp469	Dnaic1				1810030J14Rik				Tbc1d7	1	AK015826	3	AK042647	1	Tor2a	1
	Fscn1	Zcchc7				EG545391				Tbc1d9	1	AK015741	3	AK042807	1	Tox2	1
	Grid2ip	1300002K09Rik				Sccpdh				Tbcb	1	AK014974	3	AK042843	1	Tox3	1
	Trrap	Trim14				Ahctf1				Tbx5	1	AK014964	3	AK042944	1	Tpst2	1
	Ubl3	Coro2a				H3f3b				Tbxa2r	1	AK013372	3	AK043331	1	Traf3	1
	Rxfp2	Gabbr2				9130409I23Rik				Tcn2	1	AK012381	3	AK043460	1	Trak2	1
	AK006454	Akap2				Cnih3				Tcof1	1	AK007819	3	AK043531	1	Trerf1	1
	AK015284	Edg2				Enah				Tdrd9	1	AK007260	3	AK043564	1	Trhde	1
	AK213636	Ugcg				Degs1				Tead1	1	AK007204	3	AK043851	1	Trim71	1
	Ankrd7	Alad				Dusp10				Tecta	1	AK007073	3	AK043947	1	Trim9	1
	Wnt16	RP23-257P7.3				Mosc2				Tegt	1	AK006768	3	AK043982	1	Trip13	1
	Arf5	mKIAA1633				Rab3gap2				ten-m4	1	AK006465	3	AK044430	1	Trpc4ap	1
	Irf5	D4Bwg0951e				Lyplal1				Tgfbr2	1	AK006451	3	AK044449	1	Tsc22d1	1
	AK005895	Bnc2				AK020767				Tgfbr3	1	AK006131	3	AK044653	1	Tsc22d4	1
	Mtpn	Elavl2				BC072557				Th1l	1	AK006108	3	AK044786	1	Tsga14	1
	Chrm2	AK089375				Cenpf				Thnsl2	1	AK006071	3	AK045643	1	Tshz1	1
	AK016417	Ror1				Ptpn14				Thsd4	1	AK006031	3	AK045700	1	Tspan15	1
	Ndufb2	Raver2				Rps6kc1				Timm50	1	Ajap1	3	AK045913	1	Tssc1	1
	EG546896	Jak1				9630055N22Rik				Tinag	1	Aim1l	3	AK046316	1	Ttc15	1
	Nap1l5	Pde4b				AK006895				Tiparp	1	Ahi1	3	AK046349	1	Ttc7	1
	Gm1070	Sgip1				Cd34				TIPR	1	Aggf1	3	AK046740	1	Ttyh3	1
	Cd8a	SGIP1alpha				A130090K04Rik				Tirap	1	Adrbk2	3	AK046786	1	Twf2	1
	AK016225	AK028077				Iyd				Tll1	1	Adra2a	3	AK047141	1	Txlna	1
	4931417E11Rik	Ppap2b				Stxbp5				Tln2	1	Adra1b	3	AK047239	1	Txndc1	1
	D6Mm5e	AK084081				AK016412				Tlr12	1	Adcyap1r1	3	AK047558	1	Tyw1	1
	Ankrd53	LOC546840				AK041609				Tm7sf4	1	Adcy8	3	AK047765	1	U2af1	1
	Spr	2010305A19Rik				Epm2a				Tmcc1	1	Adarb2	3	AK047946	1	U46068	1
	Cml3	Rab3b				Utrn				Tmco4	1	Adamtsl1	3	AK047978	1	Uap1	1
	2610209M04Rik	2310026E23Rik				AK035829				Tmco7	1	Adamts7	3	AK047988	1	Ubap2	1
	Podxl2	OTTMUSG00000008561				AK021178				Tmem108	1	Adamts17	3	AK048280	1	Ubb	1
	4933427D06Rik	Ptch2				Txlnb				Tmem117	1	Adamts14	3	AK048739	1	Ube2v1	1
	AK006738	Gm1661				Reps1				Tmem130	1	Acvrl1	3	AK048775	1	Ubl3	1
	Rad18	Jmjd2a				EG237300				Tmem131	1	ActR	3	AK048946	1	Unc5c	1
	AK038749	Ptprf				AK044491				Tmem132d	1	Acta2	3	AK049264	1	Unk	1
	Anubl1	Cldn19				AK169479				Tmem159	1	Abhd8	3	AK049847	1	Uqcc	1
	Olfr212	Hivep3				Olig3				Tmem16b	1	Abcd2	3	AK050069	1	Usp10	1
	Clec4a3	Scmh1				AK029599				Tmem174	1	Abcc6	3	AK050197	1	Usp13	1
	Cd163	Smap1l				Il20ra				Tmem18	1	Abca9	3	AK050336	1	Usp2	1
	C530028O21Rik	Bmp8b				Slc35d3				Tmem189	1	Abca6	3	AK050351	1	Usp24	1
	Kcna6	Inpp5b				Map3k5				Tmem19	1	Abat	3	AK050558	1	Usp32	1
	Prmt8	Rspo1				AK041716				Tmem26	1	A830073O21Rik	3	AK050735	1	Uvrag	1
	Gprc5a	Col8a2				Aldh8a1				Tmem30b	1	A830043J08Rik	3	AK051887	1	Vac14	1
	Hebp1	BC039093				1700020N01Rik				Tmem8	1	A730037C10Rik	3	AK052590	1	Vav2	1
	Grin2b	Sync				Moxd1				Tmem80	1	A430107O13Rik	3	AK052711	1	Vav3	1
	Igbp1b	Col16a1				AK014660				Tmod2	1	A2bp1	3	AK052788	1	Vdu1	1
	St8sia1	Pum1				Enpp3				Tmprss2	1	9430022F06Rik	3	AK052888	1	Vegf	1
	AK139687	Eya3				Rspo3				Tmprss4	1	9430016H08Rik	3	AK053040	1	Veph-A	1
	1700023A16Rik	Fgr				Hey2				Tmtc2	1	9130227C08Rik	3	AK053124	1	Vgll4	1
	Klhdc5	Ahdc1				Hddc2				Tnfaip2	1	9130211I03Rik	3	AK053136	1	Vil1	1
	AK131696	slp1				AK036470				Tnfrsf14	1	6530404N21Rik	3	AK053157	1	Vipr1	1
	Fiz1	Tmem57				Dse				Tnfrsf21	1	6430573F11Rik	3	AK053505	1	Vps13d	1
	2310014L17Rik	Il22ra1				Frk				Tnpo1	1	6332401O19Rik	3	AK053993	1	Vps33a	1
	Mzf1	Cnr2				AK040320				Tnrc6a	1	6330505N24Rik	3	AK053994	1	Vps45	1
	Ptgir	Htr1d				AK016383				Tns1	1	6330409N04Rik	3	AK054042	1	Vrk1	1
	EG434128	Hspg2				Amd2				Tom40	1	5730557B15Rik	3	AK054128	1	Vsig8	1
	0710005I19Rik	Usp48				AK006037				Tomm20	1	4933426M11Rik	3	AK054442	1	Vwa2	1
	Dmpk	Hp1bp3				Lace1				Tox2	1	4933425L03Rik	3	AK054526	1	Vwc2	1
	Exoc3l2	0610009K11Rik				gl				Tpcn2	1	4933422H20Rik	3	AK076253	1	Wbscr16	1
	Bloc1s3	AK014098				Sec63				Tpm3	1	4933407C03Rik	3	AK076318	1	Wdr51a	1
	Bcl3	Tmco4				Prdm1				traf4	1	4932702K14Rik	3	AK076372	1	Wdr7	1
	Nlrp5	Pax7				Popdc3				Trak1	1	4930505D03Rik	3	AK076665	1	Wdr72	1
	Zfp114	Spata21				Lin28b				Tram1l1	1	4930444A02Rik	3	AK076673	1	Wfdc8	1
	Dedd2	Fblim1				Sim1				Treh	1	4930431J08Rik	3	AK076716	1	Whrn	1
	2310022A10Rik	Dnajc16				Dux				Trhde	1	4922505E12Rik	3	AK076722	1	Wipi2	1
	Zfp780b	Prdm2				AK133046				Trim2	1	4921537P18Rik	3	AK076733	1	Wnk2	1
	C330005M16Rik	Tnfrsf1b				Pla2g12b				Trip11	1	4921524J06Rik	3	AK076831	1	Wnt3a	1
	Capn12	Mfn2				Cdh23				Trpc7	1	4732495G21Rik	3	AK076909	1	Wnt4	1
	Actn4	Ubiad1				2510003E04Rik				Trpm1	1	4632417N05Rik	3	AK076918	1	Wnt7a	1
	A230107C01Rik	H6pd				AK129421				Trpv3	1	2410131K14Rik	3	AK076961	1	Wnt7b	1
	Gm1082	Slc45a1				mKIAA4170				Trpv4	1	2310046A06Rik	3	AK076966	1	Wscd1	1
	Zbtb32	Errfi1				Mypn				Tsc22d2	1	2310043J07Rik	3	AK076984	1	Wwtr1	1
	Chst8	Camta1				Ctnna3				Tshz1	1	2310008M10Rik	3	AK077074	1	Xkr6	1
	Gpatc1	Dnajc11				AK076946				Tshz2	1	2010300C02Rik	3	AK077135	1	Xrcc2	1
	2410004F06Rik	Prdm16				Gm237				Tshz3	1	2010111I01Rik	3	AK077350	1	Yipf2	1
	zfp507	Prkcz				1700040L02Rik				Tspan33	1	2010109K11Rik	3	AK077358	1	Zcchc7	1
	AK019701	Cpsf3l				AK015956				Tspan9	1	2010107E04Rik	3	AK077405	1	Zdhhc19	1
	2810426N06Rik	Cdk6				AK039487				Tssc1	1	1810063B05Rik	3	AK078795	1	Zdhhc25	1
	Myh14	Ankib1				AK080816				Ttc28	1	1810044A24Rik	3	AK078931	1	Zfhx3	1
	Ruvbl2	Akap9				Rtdr1				Ttll10	1	1700028P14Rik	3	AK079018	1	Zfp179	1
	Sec1	Magi2				Zfp280b				Ttll11	1	1700025K23Rik	3	AK079263	1	Zfp366	1
	BC062913	Prkag2				D10Jhu81e				Txn1	1	1700025G04Rik	3	AK079660	1	Zfp42	1
	Abhd2	Lmbr1				4932409I22Rik				Txndc15	1	1700023A16Rik	3	AK079675	1	Zfp422	1
	Idh2	mKIAA1724				Apba3				U2af1	1	1700019O17Rik	3	AK079912	1	Zfp462	1
	Zscan2	Kcnk3				Aes				Ube2d1	1	1700014N06Rik	3	AK080010	1	Zfp488	1
	AK006119	Hgfac				Chst11				Ube2e1	1	1700012H17Rik	3	AK080292	1	Zfp503	1
	l7Rn6	Ablim2				Appl2				Ube2e2	1	1700011L22Rik	3	AK080657	1	Zfp523	1
	Ccdc83	Stx18				Ric8b				Ubiad1	1	1700007G11Rik	3	AK081086	1	Zfp532	1
	Gab2	AK039827				Btbd11				Uchl3	1	1190005I06Rik	3	AK081414	1	Zfp664	1
	2810406K13Rik	9630031F12Rik				Pah				Uck2	1	1110034G24Rik	3	AK082467	1	Zfp694	1
	Rps3	mKIAA1239				Sycp3				Unc13a	1	1110014N23Rik	3	AK082625	1	Zfp91	1
	Dnajb13	0610040J01Rik				Tmem16d				Unc84b	1	1110002B05Rik	3	AK082731	1	Zfpm1	1
	Centd2	1110003E01Rik				Gas2l3				Ush1c	1	1110001D15Rik	3	AK082948	1	Zfyve1	1
	Olfr544	AK007290				Nr1h4				Ush2A	1	40817	3	AK083054	1	Zfyve27	1
	Olfr549	Atp8a1				AK036288				Usp20	1	Zwint	2	AK083230	1	Znf326	1
	Olfr601	Atp10d				Anks1b				Usp29	1	Zscan2	2	AK084081	1	Znrf3	1
	Olfr632	Fryl				DQ556351				Usp47	1	Zmiz1	2	AK084284	1	Zp1	1
	Ppfibp2	BC031901				AK038827				Ust	1	Zkscan1	2	AK084362	1	Zwint	1
	Sox6	Usp46				Tmcc3				Vangl1	1	Zic1	2	AK084517	1
	Lat	Scfd2				AK087886				Vapb	1	Zfpm2	2	AK084679	1
	Aldoa	Chic2				AK033206				Varp	1	Zfp787	2	AK085274	1
	AI467606	Lphn3				AK002250				Vash2	1	Zfp764	2	AK085477	1
	Zfp768	Ugt2b36				Atp2b1				Vasn	1	Zfp710	2	AK085522	1
	8030466O12Rik	Rufy3				Dusp6				Vdr	1	Zfp692	2	AK085818	1
	Bckdk	Scarb2				Pamci				vesl-2	1	Zfp69	2	AK085891	1
	Trim72	Shroom3				AK144104				Vps37c	1	Zfp689	2	AK085995	1
	Itgad	Ankrd56				8430416H19Rik				Vti1a	1	Zfp64	2	AK086149	1
	Inpp5f	Fras1				Lin7a				Wapal	1	Zfp622	2	AK086288	1
	Nsmce4a	Enoph1				Ptprq				Wars2	1	Zfp607	2	AK086290	1
	Pstk	Hel308				Nav3				Wbp2	1	Zfp533	2	AK086602	1
	Bub3	A230097K15Rik				AK078991				Wbp2nl	1	Zfp521	2	AK086749	1
	AK019737	Arhgap24				Nap1l1				Wbscr17	1	Zfp488	2	AK087045	1
	Ki-67	Aff1				Krr1				Wdfy2	1	Zfp474	2	AK087264	1
	Mgmt	Klhl8				Ptprb				Wdr61	1	Zfp46	2	AK087376	1
	AK040659	Lrrc8b				Best3				Wfdc5	1	Zfp42	2	AK088937	1
	6430531B16Rik	D830014E11Rik				Nup107				Wfs1	1	Zfp36l3	2	AK089049	1
	1810014F10Rik	Tgfbr3				AK089123				Wipi2	1	Zfp369	2	AK089375	1
	Syce1	2900024C23Rik				AK019561				Wscd1	1	Zfp352	2	AK090268	1
	Shcbp1	Cplx1				Irak3				Wscd2	1	Zfp341	2	AK090336	1
	0710008K08Rik	A830023I12Rik				4930505D03Rik				Wt1	1	Zfp280b	2	AK090359	1
	Tpte	2410025L10Rik				Gns				Wwc1	1	Zfp273	2	AK131742	1
	Nkx6-3	Ttc28				Tbk1				Wwc2	1	Zfp27	2	AK131834	1
	AK017331	Acacb				BC048403				X99384	1	Zfp2	2	AK131839	1
	Fgfr1	BC057022				Ppm1h				Xdh	1	Zfp191	2	AK132084	1
	Dusp26	Sppl3				AK005576				Xpot	1	Zfp169	2	AK132134	1
	Tex15	Hspb8				Gli1				Zadh2	1	Zfp157	2	AK132154	1
	Tmem66	Wsb2				Sdro				Zbtb20	1	Zfhx4	2	AK132687	1
	Mfhas1	Thrap2				Rps26				Zbtb37	1	Zdhhc17	2	AK132719	1
	AK082764	Dtx1				Olfr774				Zbtb40	1	Zcwpw2	2	AK132729	1
	mKIAA1456	Aldh2				Nf2				Zc3h12a	1	Zcchc2	2	AK132929	1
	AI429214	Brap				Znrf3				Zc3h15	1	Zc3h15	2	AK133227	1
	Zfp42	TAPL				Adcy1				Zc3h7a	1	Zbtb7c	2	AK134652	1
	Odz3	2810006K23Rik				Igfbp3				Zcchc14	1	Zbtb45	2	AK135068	1
	Trim60	Sbno1				Upp1				Zcwpw2	1	Zbtb4	2	AK135132	1
	Trim61	Ncor2				Abca13				Zdhhc7	1	Zbtb12	2	AK135370	1
	Atp6v1b2	Stx2				DQ556351				Zfp395	1	Zbp1	2	AK135377	1
	Slc5a5	Psph				Egfr				zfp507	1	Yipf4	2	AK135410	1
	Pgls	Gusb				Ppp3r1				Zfp516	1	Xpnpep1	2	AK135726	1
	Hmox1	Tpst1				AK018427				Zfp609	1	Xirp2	2	AK135813	1
	1700007B14Rik	mpp-GalNAc-T17(O6)				Spred2				Zfp629	1	Xbp1	2	AK136028	1
	1700067K01Rik	Auts2				Sertad2				Zfp652	1	Wnt5a	2	AK136047	1
	Farsa	Wbscr16				AK038605				Zfp750	1	Wipf1	2	AK136844	1
	DQ699365	Stx1a				mKIAA0903				Zfp84	1	Wfdc15a	2	AK137190	1
	Ccl22	Mlxipl				4930430E16Rik				Zfpm1	1	Wdr67	2	AK138291	1
	Mmp15	Tmem120a				Xpo1				Zhx3	1	Wdr40b	2	AK138667	1
	Tppp3	Azgp1				Bcl11a				Zkscan2	1	Wdr27	2	AK138755	1
	Nrn1l	BC004044				AK017784				Znrf3	1	Wdr16	2	AK138811	1
	AK015813	1110007L15Rik				Efemp1				Zranb3	1	Wbscr18	2	AK139092	1
	AK019773	3110082I17Rik				Acyp2				Zubr1	1	Wars2	2	AK139229	1
	DQ540318	Mad1				Stc2				Zzz3	1	Wapal	2	AK139483	1
	AK019781	Sdk1				4930524B15Rik						Vti1-rp2	2	AK139864	1
	Hsbp1	AK038791				Hbq1						Vtcn1	2	AK141540	1
	AK015063	Nptx2				Sh3pxd2b						Vps4b	2	AK142406	1
	AK040202	Tmem130				Fgf18						Vps13a	2	AK142467	1
	8430410K20Rik	Smurf1				Pank3						Veph-A	2	AK142593	1
	Ccdc67	Pan3				AK145334						Vdac1	2	AK142614	1
	Mtnr1b	Flt1				Mat2b						Vav1	2	AK142847	1
	2210010B09Rik	Uspl1				AK049168						Vash1	2	AK144295	1
	Dnmt1	Asb4				BC079904						Vangl1	2	AK144477	1
	Tmed1	Slc25a13				4631424J17Rik						V1rc15	2	AK144536	1
	B3gat1	Cav1				Flt4						V1ra5	2	AK144811	1
	Glb1l3	Tspan12				Gfpt2						Usp9y	2	AK144984	1
	Nfrkb	Grm8A				Nola2						Usp32	2	AK145144	1
	Ccdc84	Zfp800				Cdkn2aipnl						Usp24	2	AK145161	1
	Foxr1	Snd1				Olfr1373						Ush2a	2	AK145276	1
	Cd3e	Cpa4				Vdac1						Upk1a	2	AK145307	1
	Ddx10	AK043851				P4ha2						Upb1	2	AK146139	1
	4933412E14Rik	Mkln1				Sparc						Unc5d	2	AK146230	1
	Cib2	Plxna4				1810073G14Rik						Unc5cl	2	AK146888	1
	Dnaja4	Chchd3				Myo15						Ucn3	2	AK148054	1
	Pnr	Slc35b4				Alkbh5						Ube2u	2	AK148198	1
	Spesp1	Cald1				Epn2						Ube2e2	2	AK149205	1
	Megf11	Stra8				AK032662						Ube1y1	2	AK149260	1
	Dpp8	Tbxas1				Ubb						Ubb	2	AK149321	1
	5430433E21Rik	Ephb6				Hs3st3b1						U2af1	2	AK153491	1
	Snx22	Osbpl3				BSAC2A						Tyki	2	AK153584	1
	DQ715562	Snx10				Map2k4						Txnrd1	2	AK154034	1
	Unc13c	Creb5				A530088H08Rik						Tusc3	2	AK154552	1
	Bcl2l10	Cpvl				Ccdc42						Tulp2	2	AK155516	1
	Lca5	Nod1				Myh10						Tubb1	2	AK156148	1
	Mras	Kbtbd2				Aipl1						Ttn	2	AK156750	1
	Cldn18	Gprin3				Olfr393						Ttll1	2	AK156842	1
	Il20rb	Grid2				Abr						Ttc9	2	AK157178	1
	Ppm1m	Il12rb2				Ksr1						Ttc8	2	AK157218	1
	Alas1	Fabp1				AK078931						Tspan17	2	AK157499	1
	Bsn	Reep1				Utp6						Tslp	2	AK157531	1
	Arih2	Ggcx				Spaca3						Tshz1	2	AK157788	1
	Camp	Rbed1				Ccl1						Tshr	2	AK157980	1
	1700036D21Rik	Tmem166				AK085477						Trub1	2	AK158034	1
	Tessp3	Hk2				0610013E23Rik						Trrap	2	AK158619	1
	Gpd1l	Pcgf1				Dhx40						Trpm1	2	AK158658	1
	Stt3b	Stambp				Dynll2						Trpc3	2	AK160416	1
	Tgfbr2	Tgfa				Nog						Trp63	2	AK161079	1
	AK039053	Rab41				Mmd						trp3	2	AK162063	1
	Scn10a	Eefsec				Hlf						Trio	2	AK162519	1
	EG546166	Klf15				AK015094						Trim72	2	AK163095	1
	Kbtbd5	Hdac11				Utp18						Trim66	2	AK163151	1
	Ccnb3	Xpc				Nme1						Trim52	2	AK163160	1
	Gripap1	4930590J08Rik				A430060F13Rik						Trim42	2	AK163447	1
	Wdr13	AK044653				Nxph3						Trim2	2	AK163572	1
	Srpx	Shq1				Atp5g1						Trim13	2	AK163711	1
	Tspan7	Edem1				Copz2						Trh	2	AK165089	1
	BC049702	Grm7				Osbpl7						Trfr2	2	AK165697	1
	1700023I07Rik	Il17rc				5330439C02Rik						Trap1a	2	AK165835	1
[truncated: 5,247 more rows]
