# Supplementary material for: A Minimal Set of Tissue-Specific Hypomethylated CpGs Constitute Epigenetic Signatures of Developmental Programming
Source: PLoS One. 2013 Sep 12;8(9):e72670. doi: 10.1371/journal.pone.0072670 (PMC3771925; doi:10.1371/journal.pone.0072670)
Supplement: Data Set S5 — List of 5,574 diet-reprogrammed differentially methylated CpGs (XLSX) [file pone.0072670.s006.xlsx]

## Sheet: eDMCpGs
Chr	Position	CC_ACT	CC_GAC	CC_TCA	CC_TGA	CU_ACT	CU_GAC	CU_REG	CU_TCA	CU_TGA	UC_TCA	UC_TGA	UU_ACT	UU_GAC	UU_REG	UU_TCA	UU_TGA	GeneRegion	Gene-UCSC	Name	RefSeq	Details
chr1	5906812	60.75	69.37	52.99	56.25	127.68	99.12	100.88	125.24	118.8	113.04	111.11	80	148.98	53.78	73.45	114.95	Intergenic
chr1	6431522	9.35	9.01	11.97	11.61	15.18	20.35	37.72	15.53	13.68	17.39	15.28	18	23.47	26.05	25.66	18.69	Intergenic
chr1	7284388	16.82	16.22	19.66	35.71	1.79	2.65	10.53	0.97	2.56	2.61	2.08	2	2.04	0.84	1.77	0	Intergenic
chr1	7538485	18.69	13.51	23.93	27.68	12.5	0	3.51	0	0	0	0.69	0	0	0	0	0	Intergenic
chr1	9538153	14.02	14.41	13.68	10.71	12.5	8.85	7.89	6.8	11.11	4.35	7.64	6	5.1	4.2	7.08	5.61	TSS	NM_175236	Adhfe1	NM_175236	Fe-containing alcohol dehydrogenase 1
chr1	9639118	29.91	33.33	38.46	33.93	14.29	15.93	11.4	15.53	13.68	16.52	18.75	15	9.18	29.41	30.97	16.82	Intergenic
chr1	10587412	12.15	8.11	9.4	16.07	3.57	1.77	4.39	0.97	0	0	0.69	1	1.02	0	0	0	Gene body	AK078883	Cpa6		Carboxypeptidase A6 precursor (EC 3.4.17.1).
chr1	10994327	10.28	12.61	10.26	7.14	3.57	3.54	6.14	2.91	5.98	4.35	2.08	4	2.04	2.52	3.54	1.87	Gene body	AM109952	Depdc2		P-Rex2 protein.
chr1	11466048	39.25	51.35	36.75	36.61	16.07	18.58	10.53	19.42	14.53	20.87	34.72	18	22.45	26.05	25.66	28.97	Intergenic
chr1	14579811	0.93	0	0	0	5.36	10.62	12.28	8.74	17.09	17.39	8.33	10	5.1	5.04	15.04	11.21	Intergenic
chr1	15192890	18.69	23.42	27.35	21.43	9.82	15.93	6.14	6.8	17.09	7.83	18.06	6	7.14	8.4	12.39	6.54	Intergenic
chr1	16094789	39.25	35.14	40.17	39.29	25	24.78	19.3	24.27	26.5	23.48	33.33	23	12.24	23.53	27.43	25.23	TSS	NM_011291	Rpl7	NM_011291	ribosomal protein L7
chr1	18306197	18.69	19.82	22.22	24.11	12.5	8.85	7.02	8.74	12.82	8.7	24.31	7	10.2	11.76	10.62	9.35	Intergenic
chr1	19216164	64.49	57.66	58.12	50	33.93	32.74	28.95	36.89	29.91	26.09	45.14	48	45.92	40.34	47.79	22.43	Intergenic
chr1	19231644	10.28	14.41	8.55	7.14	98.21	30.09	64.91	63.11	45.3	81.74	36.81	40	82.65	8.4	11.5	56.07	3End	AK078046	Tcfap2b	NM_001025305	transcription factor AP-2 beta isoform 2
chr1	19918092	15.89	16.22	17.09	21.43	4.46	7.96	3.51	13.59	2.56	4.35	2.78	7	8.16	5.88	8.85	4.67	Intergenic
chr1	20881254	0	0	0	0	5.36	16.81	10.53	6.8	14.53	8.7	4.17	12	9.18	10.92	15.04	10.28	TSS	NM_028829	Paqr8	NM_028829	progestin and adipoQ receptor family member
chr1	21049391	16.82	13.51	11.97	9.82	2.68	2.65	3.51	6.8	2.56	8.7	6.94	4	3.06	2.52	1.77	4.67	Gene body	NM_177409	Tram2	NM_177409	translocating chain-associating membrane protein
chr1	21951146	0.93	0.9	0	0.89	8.93	15.93	7.89	4.85	13.68	11.3	1.39	2	8.16	8.4	2.65	6.54	TSS	NM_023872	Kcnq5	NM_023872	potassium voltage-gated channel, subfamily Q,
chr1	23261160	7.48	4.5	4.27	6.25	16.96	22.12	28.95	18.45	13.68	13.91	7.64	11	13.27	10.92	2.65	25.23	Intergenic
chr1	23966175	67.29	59.46	79.49	74.11	30.36	38.94	34.21	45.63	36.75	35.65	25	31	39.8	73.95	88.5	29.91	Intergenic
chr1	25889287	6.54	4.5	5.98	6.25	8.93	10.62	14.04	6.8	10.26	15.65	7.64	19	17.35	13.45	13.27	11.21	TSS	NM_175642	Bai3	NM_175642	brain-specific angiogenesis inhibitor 3
chr1	27562825	17.76	14.41	16.24	20.54	16.07	21.24	10.53	15.53	11.97	25.22	6.25	7	5.1	8.4	4.42	7.48	Intergenic
chr1	28149129	17.76	22.52	23.08	20.54	10.71	8.85	7.89	10.68	10.26	10.43	18.06	14	15.31	16.81	10.62	13.08	Intergenic
chr1	33214374	12.15	13.51	17.09	11.61	3.57	6.19	2.63	1.94	5.13	4.35	2.78	3	3.06	4.2	4.42	1.87	Intergenic
chr1	33727071	20.56	11.71	15.38	8.93	15.18	12.39	10.53	10.68	11.97	12.17	20.14	23	26.53	19.33	21.24	26.17	TSS	BC132566	1700001G17Rik		Adult male small intestine cDNA, RIKEN full-length enriched library, clone:2010106K18 product:hypothetical protein, full insert sequence (Adult male small intestine cDNA, RIKEN full-length enriched library, clone:2010013K13 product:hypothetical protein, f
chr1	33964373	2.8	0.9	0.85	0.89	24.11	7.96	20.18	17.48	11.11	14.78	15.28	10	37.76	2.52	2.65	21.5	TSS	NM_177235	B230209C24Rik	NM_177235	hypothetical protein LOC320705
chr1	34496910	0	0.9	0.85	0	16.96	8.85	35.09	9.71	23.08	24.35	0	3	0	8.4	2.65	10.28	TSS	NM_178601	Imp4	NM_178601	U3 snoRNP protein 4 homolog
chr1	34516441	24.3	30.63	30.77	38.39	100.89	64.6	83.33	104.85	63.25	74.78	68.75	80	81.63	58.82	46.9	100.93	TSS	NM_011206	Ptpn18	NM_011206	protein tyrosine phosphatase, non-receptor type
chr1	34735683	0	0	0	0	1.79	59.29	0.88	0	64.96	1.74	0	85	72.45	62.18	53.1	46.73	TSS	AK082264	AK082264		Mus musculus 0 day neonate cerebellum cDNA, RIKEN full-length enriched library, clone:C230030N03 product:hypothetical protein, full insert sequence.
chr1	35937935	7.48	8.11	10.26	14.29	1.79	0.88	4.39	5.83	3.42	7.83	4.17	1	1.02	0.84	2.65	2.8	TSS	AK003327	AK003327		Mus musculus 18-day embryo whole body cDNA, RIKEN full-length enriched library, clone:1110002O04 product:unclassifiable, full insert sequence.
chr1	35988234	10.28	6.31	6.84	8.93	0.89	0.88	0	0.97	0.85	2.61	4.86	0	2.04	2.52	0.88	0	Intergenic
chr1	36285435	6.54	8.11	11.11	8.04	1.79	0	0.88	0	0	2.61	0.69	0	0	0.84	0	1.87	Gene body	NM_198899	Ugcgl1	NM_198899	UDP-glucose ceramide glucosyltransferase-like 1
chr1	36582478	36.45	44.14	41.88	50.89	6.25	7.08	7.02	13.59	8.55	44.35	53.47	11	2.04	17.65	12.39	7.48	Gene body	NM_001039551	Cnnm3	NM_001039551	cyclin M3 isoform 2
chr1	36837936	35.51	28.83	30.77	38.39	15.18	15.93	14.91	14.56	11.97	36.52	45.14	25	17.35	12.61	32.74	25.23	TSS	AB084383	Zap70	NM_009539	zeta-chain (TCR) associated protein kinase
chr1	37226613	10.28	10.81	12.82	9.82	2.68	1.77	2.63	3.88	4.27	4.35	6.25	1	5.1	1.68	4.42	4.67	Intergenic
chr1	37462801	14.02	10.81	14.53	15.18	1.79	3.54	3.51	3.88	2.56	1.74	2.78	1	3.06	2.52	3.54	2.8	3End	NM_172971	Inpp4a	NM_172971	inositol polyphosphate-4-phosphatase, type I
chr1	38571333	13.08	17.12	15.38	14.29	6.25	7.96	7.02	7.77	7.69	4.35	11.81	9	2.04	8.4	14.16	3.74	Gene body	AK014322	Aff3		Mus musculus 14, 17 days embryo head cDNA, RIKEN full-length enriched library, clone:3222402O04 product:similar to LAF-4 PROTEIN (LYMPHOID NUCLEAR PROTEIN RELATED TO AF4) [Homo sapiens], full insert sequence.
chr1	39122708	18.69	18.02	13.68	14.29	4.46	13.27	8.77	12.62	13.68	18.26	15.28	6	7.14	5.88	7.96	8.41	Intergenic
chr1	39162548	28.97	37.84	45.3	41.07	15.18	16.81	11.4	10.68	16.24	24.35	20.14	10	8.16	12.61	40.71	9.35	Intergenic
chr1	39262056	82.24	65.77	61.54	75.89	26.79	31.86	17.54	20.39	31.62	27.83	42.36	14	23.47	35.29	47.79	24.3	Gene body	NM_008719	Npas2	NM_008719	neuronal PAS domain protein 2
chr1	39632540	28.97	32.43	28.21	24.11	15.18	15.04	11.4	15.53	15.38	9.57	9.03	24	11.22	12.61	30.09	9.35	TSS	NM_001033135	Rnf149	NM_001033135	ring finger protein 149
chr1	39747738	0	0	0	0	17.86	11.5	0	13.59	6.84	17.39	11.11	10	20.41	10.08	14.16	14.02	Gene body	AK133372	AK133372		Mus musculus adult male testis cDNA, RIKEN full-length enriched library, clone:4933400N17 product:hypothetical DNA-binding RFX/Winged helix DNA-binding containing protein, full insert sequence.
chr1	39958008	0.93	1.8	0.85	0	21.43	6.19	23.68	15.53	11.11	22.61	6.94	7	8.16	0.84	0.88	29.91	TSS	AK129191	Map4k4	NM_008696	mitogen-activated protein kinase kinase kinase
chr1	40636736	0	0	0	0	19.64	31.86	17.54	23.3	25.64	57.39	37.5	32	45.92	16.81	34.51	15.89	TSS	NM_177084	Slc9a4	NM_177084	solute carrier family 9 (sodium/hydrogen
chr1	40708085	65.42	52.25	50.43	51.79	28.57	23.89	28.95	33.01	33.33	39.13	47.22	42	34.69	47.9	71.68	24.3	Intergenic
chr1	40824681	13.08	11.71	18.8	18.75	13.39	15.04	14.04	10.68	11.11	9.57	11.81	21	25.51	27.73	20.35	25.23	Gene body	NM_001033289	Slc9a2	NM_001033289	solute carrier family 9 (sodium/hydrogen
chr1	40952029	0.93	0	0	0	5.36	8.85	4.39	7.77	11.11	5.22	6.25	3	7.14	5.04	8.85	12.15	Intergenic
chr1	41040794	55.14	49.55	55.56	58.93	19.64	28.32	21.05	18.45	28.21	18.26	22.92	20	29.59	39.5	57.52	19.63	Intergenic
chr1	42917113	19.63	23.42	18.8	16.07	6.25	5.31	5.26	2.91	7.69	8.7	12.5	9	5.1	15.13	14.16	7.48	TSS	BC083159	Mrps9		Mrps9 protein (Fragment).
chr1	43560801	24.3	25.23	29.06	29.46	4.46	5.31	7.89	5.83	10.26	13.04	18.06	6	6.12	10.92	26.55	11.21	Intergenic
chr1	43774909	77.57	63.96	55.56	64.29	18.75	29.2	28.95	24.27	45.3	73.91	71.53	29	30.61	41.18	35.4	28.97	Intergenic
chr1	43775072	22.43	21.62	35.04	26.79	9.82	10.62	7.89	6.8	19.66	23.48	19.44	8	6.12	10.92	8.85	5.61	Intergenic
chr1	44175477	12.15	11.71	13.68	8.93	5.36	9.73	2.63	3.88	3.42	5.22	1.39	2	1.02	2.52	2.65	3.74	TSS	NM_023645	Kdelc1	NM_023645	KDEL (Lys-Asp-Glu-Leu) containing 1
chr1	44204748	10.28	7.21	5.98	7.14	27.68	17.7	19.3	35.92	23.93	14.78	13.19	19	22.45	5.04	8.85	25.23	TSS	BC033413	Ercc5		10, 11 days embryo whole body cDNA, RIKEN full-length enriched library, clone:2810037C24 product:excision repair cross-complementing rodent repair deficiency,complementation group 5, full insert sequence. (Fragment).
chr1	44608447	12.15	10.81	13.68	9.82	16.96	9.73	17.54	13.59	12.82	8.7	13.19	20	21.43	21.85	23.01	28.04	TSS	NM_027506	Gulp1	NM_027506	PTB domain adaptor protein CED-6 isoform 1
chr1	46646634	8.41	11.71	11.97	8.93	2.68	2.65	1.75	2.91	3.42	7.83	10.42	5	7.14	2.52	7.08	2.8	Intergenic
chr1	47238148	93.46	150.45	128.21	133.04	110.71	94.69	72.81	56.31	94.02	60	31.94	33	53.06	37.82	35.4	23.36	Intergenic
chr1	49295619	13.08	14.41	15.38	15.18	3.57	7.08	3.51	5.83	5.98	5.22	6.25	3	5.1	4.2	6.19	4.67	Intergenic
chr1	51951284	50.47	39.64	35.04	33.04	19.64	15.93	14.91	25.24	14.53	32.17	30.56	16	9.18	13.45	9.73	9.35	Gene body	AK138265	Myo1b		Mus musculus 0 day neonate eyeball cDNA, RIKEN full-length enriched library, clone:E130307B17 product:myosin Ib, full insert sequence.
chr1	52196890	17.76	11.71	29.91	14.29	2.68	0.88	1.75	1.94	3.42	10.43	20.14	2	0	1.68	0.88	0.93	3End	AK088874	Stat1		Mus musculus adult male colon cDNA, RIKEN full-length enriched library, clone:9030611B09 product:signal transducer and activator of transcription 1, full insert sequence.
chr1	52691122	7.48	8.11	12.82	6.25	0	0.88	0.88	1.94	2.56	1.74	8.33	1	0	0	1.77	0.93	Gene body	AK036693	AK036693		Mus musculus adult male pituitary gland cDNA, RIKEN full-length enriched library, clone:5330401P04 product:hypothetical protein, full insert sequence.
chr1	52691174	28.04	27.03	23.93	18.75	3.57	2.65	7.89	2.91	5.98	5.22	13.89	7	3.06	7.56	12.39	1.87	Gene body	AK036693	AK036693		Mus musculus adult male pituitary gland cDNA, RIKEN full-length enriched library, clone:5330401P04 product:hypothetical protein, full insert sequence.
chr1	54307491	27.1	27.03	27.35	24.11	22.32	27.43	20.18	29.13	27.35	25.22	22.92	17	15.31	18.49	18.58	14.95	TSS	AK019675	4930511H11Rik		Adult male testis cDNA, RIKEN full-length enriched library, clone:4930511H11 product:hypothetical protein, full insert sequence.
chr1	54904261	12.15	9.01	12.82	7.14	0.89	0.88	0	0.97	2.56	6.09	17.36	4	5.1	5.04	10.62	5.61	Gene body	AK157584	Ankrd44	NM_001081433	ankyrin repeat domain 44
chr1	55420479	0.93	0.9	0	0	14.29	7.08	10.53	13.59	8.55	17.39	3.47	11	13.27	1.68	1.77	26.17	TSS	NM_029267	Boll	NM_029267	bol, boule-like
chr1	56737923	22.43	28.83	29.91	32.14	5.36	9.73	5.26	7.77	10.26	8.7	9.72	5	16.33	15.13	16.81	9.35	Intergenic
chr1	57027831	41.12	45.95	35.9	49.11	20.54	27.43	20.18	17.48	18.8	20.87	12.5	17	28.57	26.89	27.43	14.02	TSS	NM_139146	Satb2	NM_139146	special AT-rich sequence binding protein 2
chr1	58026408	66.36	64.86	57.26	71.43	33.04	28.32	29.82	25.24	41.03	21.74	29.86	41	38.78	52.94	60.18	38.32	TSS	AK132699	Kctd18		Mus musculus adult male testis cDNA, RIKEN full-length enriched library, clone:4932411A20 product:unclassifiable, full insert sequence.
chr1	58128139	31.78	31.53	36.75	25.89	11.61	6.19	8.77	7.77	11.97	21.74	36.11	13	17.35	10.08	14.16	23.36	Gene body	NM_009676	Aox1	NM_009676	aldehyde oxidase 1
chr1	58138385	23.36	23.42	26.5	17.86	9.82	5.31	6.14	5.83	5.98	9.57	22.92	8	8.16	15.13	5.31	6.54	Gene body	NM_009676	Aox1	NM_009676	aldehyde oxidase 1
chr1	58643382	28.04	31.53	12.82	31.25	39.29	44.25	50	39.81	43.59	31.3	29.86	30	28.57	31.93	25.66	26.17	TSS	NM_025597	Ndufb3	NM_025597	NADH dehydrogenase (ubiquinone) 1 beta
chr1	58781325	23.36	25.23	25.64	29.46	10.71	11.5	13.16	9.71	11.97	7.83	11.11	10	11.22	14.29	21.24	6.54	3End	AK161220	Cflar		Mus musculus 6 days neonate spleen cDNA, RIKEN full-length enriched library, clone:F430112F17 product:CASP8 and FADD-like apoptosis regulator, full insert sequence.
chr1	58852695	21.5	25.23	23.93	26.79	14.29	16.81	13.16	11.65	13.68	11.3	15.97	19	10.2	10.92	23.89	16.82	TSS	NM_009812	Casp8	NM_009812	caspase 8
chr1	59379445	34.58	34.23	33.33	27.68	7.14	12.39	7.89	9.71	11.97	18.26	22.22	5	10.2	21.85	21.24	16.82	Intergenic
chr1	59379595	16.82	12.61	19.66	18.75	2.68	4.42	2.63	4.85	6.84	4.35	3.47	4	6.12	6.72	12.39	11.21	Intergenic
chr1	59424670	57.94	45.95	63.25	55.36	16.96	23.89	16.67	13.59	21.37	22.61	36.11	27	26.53	48.74	39.82	19.63	Intergenic
chr1	59461154	47.66	42.34	38.46	28.57	9.82	7.96	10.53	9.71	7.69	33.04	29.86	27	22.45	23.53	16.81	10.28	Intergenic
chr1	59540431	43.93	38.74	31.62	41.07	111.61	75.22	92.98	101.94	75.21	85.22	92.36	114	92.86	29.41	38.94	109.35	TSS	NM_008057	Fzd7	NM_008057	frizzled 7
chr1	59727395	1.87	4.5	2.56	2.68	22.32	11.5	10.53	17.48	13.68	13.91	16.67	21	22.45	2.52	1.77	29.91	TSS	NM_009460	Sumo1	NM_009460	SMT3 suppressor of mif two 3 homolog 1
chr1	60154547	71.96	81.98	68.38	80.36	122.32	107.08	127.19	123.3	111.97	98.26	109.03	108	89.8	94.12	92.92	144.86	TSS	NM_021312	Wdr12	NM_021312	WD repeat domain 12
chr1	62752012	29.91	34.23	35.9	39.29	75.89	59.29	66.67	77.67	76.07	58.26	52.78	62	76.53	56.3	35.4	66.36	Gene body	NM_001077407	Nrp2	NM_001077407	neuropilin 2 isoform 6 precursor
chr1	62797921	19.63	18.92	21.37	19.64	13.39	24.78	8.77	16.5	12.82	11.3	10.42	11	13.27	11.76	13.27	12.15	Intergenic
chr1	63309096	1.87	3.6	2.56	1.79	12.5	22.12	10.53	17.48	22.22	20.87	18.75	8	16.33	11.76	23.89	15.89	Intergenic
chr1	65153778	22.43	17.12	23.93	18.75	6.25	8.85	4.39	5.83	5.98	13.04	19.44	11	11.22	7.56	7.08	12.15	3End	NM_175293	D630023F18Rik	NM_175293	hypothetical protein LOC98303
chr1	66598107	14.02	18.92	23.08	19.64	2.68	2.65	6.14	3.88	4.27	7.83	11.11	2	10.2	5.04	4.42	6.54	Intergenic
chr1	71935808	12.15	4.5	9.4	7.14	0	0	0	1.94	0.85	1.74	3.47	0	0	0.84	0.88	0	Intergenic
chr1	72073642	42.06	38.74	38.46	44.64	16.96	25.66	35.09	25.24	31.62	33.04	31.94	20	26.53	20.17	25.66	24.3	Intergenic
chr1	72240827	18.69	15.32	14.53	12.5	2.68	6.19	2.63	3.88	4.27	2.61	9.72	3	3.06	5.04	3.54	5.61	Gene body	NM_001005423	Mreg	NM_001005423	melanoregulin
chr1	72874252	9.35	16.22	11.97	13.39	36.61	52.21	29.82	38.83	37.61	20.87	9.72	38	28.57	30.25	37.17	39.25	Gene body	NM_008342	Igfbp2	NM_008342	insulin-like growth factor binding protein 2
chr1	73909471	31.78	34.23	35.04	27.68	17.86	15.93	15.79	18.45	13.68	13.04	31.25	25	20.41	15.13	24.78	19.63	TSS	AK079660	AK079660		Mus musculus adult male spinal cord cDNA, RIKEN full-length enriched library, clone:A330023J11 product:hypothetical protein, full insert sequence.
chr1	73949137	26.17	36.04	43.59	34.82	18.75	26.55	7.89	26.21	13.68	15.65	22.92	10	9.18	10.08	14.16	6.54	Intergenic
chr1	74064613	34.58	45.05	51.28	41.07	13.39	15.93	17.54	19.42	15.38	20.87	45.83	29	11.22	5.88	24.78	14.95	Intergenic
chr1	74074472	68.22	60.36	76.92	81.25	22.32	20.35	14.91	20.39	30.77	23.48	31.94	48	16.33	13.45	43.36	21.5	Intergenic
chr1	74078196	21.5	23.42	22.22	20.54	16.07	15.93	14.04	13.59	14.53	4.35	11.11	18	5.1	5.04	11.5	5.61	Intergenic
chr1	74083635	60.75	60.36	58.97	62.5	31.25	41.59	33.33	34.95	31.62	22.61	38.89	43	22.45	18.49	59.29	39.25	Intergenic
chr1	74108234	17.76	8.11	14.53	8.04	0	0	0.88	0	1.71	2.61	6.94	2	1.02	2.52	2.65	0	Intergenic
chr1	74116398	29.91	9.91	17.09	16.07	2.68	0	0.88	0	1.71	6.96	12.5	3	0	0	1.77	0.93	Intergenic
chr1	74121570	81.31	69.37	71.79	78.57	40.18	35.4	28.95	43.69	35.04	71.3	68.06	64	25.51	29.41	33.63	34.58	Intergenic
chr1	74138545	18.69	17.12	23.08	15.18	16.07	15.93	6.14	18.45	5.13	25.22	14.58	9	4.08	5.04	6.19	6.54	Intergenic
chr1	74143420	0	0	0	0	0	0	18.42	0	9.4	0	0	8	7.14	18.49	7.96	9.35	Intergenic
chr1	74145213	20.56	15.32	18.8	14.29	26.79	25.66	31.58	26.21	15.38	20.87	29.17	45	41.84	54.62	30.97	40.19	Intergenic
chr1	74335979	0	0.9	0	0	3.57	7.08	16.67	9.71	2.56	3.48	10.42	10	6.12	4.2	11.5	8.41	Gene body	NM_027154	Tmbim1	NM_027154	transmembrane BAX inhibitor motif containing 1
chr1	74343427	0	0	0	0.89	4.46	12.39	9.65	10.68	17.09	9.57	9.03	19	8.16	6.72	13.27	8.41	Gene body	NM_027154	Tmbim1	NM_027154	transmembrane BAX inhibitor motif containing 1
chr1	74386987	40.19	33.33	30.77	41.96	25	15.04	26.32	28.16	21.37	27.83	45.83	19	15.31	15.13	21.24	18.69	Gene body	NM_019999	Pnkd	NM_019999	brain protein 17 isoform 1
chr1	74433297	1.87	2.7	3.42	0.89	13.39	11.5	62.28	10.68	84.62	10.43	8.33	54	44.9	26.89	61.06	75.7	3End	NM_013612	Slc11a1	NM_013612	solute carrier family 11 (proton-coupled
chr1	74436676	0	0	0	0	1.79	0	69.3	0.97	28.21	0.87	0	28	19.39	10.08	11.5	25.23	TSS	NM_153088	Ctdsp1	NM_153088	CTD (carboxy-terminal domain, RNA polymerase II,
chr1	74466111	0	0	0	0	0	0	17.54	0	8.55	0.87	0	10	15.31	7.56	9.73	6.54	Gene body	NM_009509	Vil1	NM_009509	villin 1
chr1	74634573	35.51	25.23	34.19	27.68	14.29	14.16	7.89	8.74	10.26	12.17	14.58	22	14.29	10.08	21.24	12.15	TSS	NM_029888	Zfp142	NM_029888	zinc finger protein 142
chr1	74847177	0.93	2.7	0	0.89	33.93	15.04	50.88	36.89	29.06	26.96	15.28	21	29.59	7.56	0.88	31.78	Gene body	NM_009518	Wnt10a	NM_009518	wingless related MMTV integration site 10a
chr1	74903939	59.81	49.55	47.01	39.29	133.93	98.23	133.33	128.16	112.82	142.61	93.06	117	153.06	18.49	57.52	127.1	3End	NM_009872	Cdk5r2	NM_009872	cyclin-dependent kinase 5, regulatory subunit 2
chr1	74929706	44.86	48.65	61.54	48.21	20.54	25.66	28.95	29.13	25.64	20	36.81	45	32.65	31.09	48.67	18.69	Gene body	NM_153111	Fev	NM_153111	FEV (ETS oncogene family)
chr1	74931062	46.73	48.65	53.85	54.46	69.64	77.88	94.74	81.55	89.74	93.04	72.92	68	108.16	60.5	79.65	96.26	TSS	NM_153111	Fev	NM_153111	FEV (ETS oncogene family)
chr1	74931868	23.36	26.13	24.79	25	11.61	9.73	7.89	6.8	10.26	5.22	5.56	8	10.2	19.33	24.78	5.61	TSS	NM_153111	Fev	NM_153111	FEV (ETS oncogene family)
chr1	74947369	17.76	17.12	11.97	15.18	78.57	41.59	57.89	71.84	40.17	52.17	50	63	102.04	28.57	27.43	124.3	3End	NM_001039495	Ccdc108	NM_001039495	coiled-coil domain containing 108
chr1	74994935	19.63	21.62	20.51	16.96	42.86	45.13	39.47	33.98	52.14	33.91	27.08	37	38.78	42.86	34.51	51.4	Gene body	AK090147	Ihh		Mus musculus adult male intestinal mucosa cDNA, RIKEN full-length enriched library, clone:G630005N21 product:Indian hedgehog homolog, (Drosophila), full insert sequence.
chr1	75137741	28.97	22.52	33.33	21.43	7.14	13.27	9.65	7.77	8.55	10.43	17.36	19	12.24	2.52	28.32	9.35	TSS	BC013714	1810031K17Rik	NM_026977	hypothetical protein LOC69171
chr1	75139463	0.93	1.8	0	0.89	24.11	12.39	7.02	18.45	13.68	13.91	9.03	6	5.1	6.72	2.65	18.69	TSS	AK165957	BC038286	NM_170755	hypothetical protein LOC227298
chr1	75212397	52.34	43.24	41.88	27.68	8.04	5.31	7.02	9.71	7.69	11.3	43.75	10	7.14	5.04	15.93	9.35	3End	AB022179	Stk16	NM_011494	serine/threonine kinase 16
chr1	75308437	14.95	13.51	18.8	13.39	3.57	3.54	5.26	3.88	1.71	20	21.53	3	2.04	9.24	5.31	0.93	Gene body	AK052001	Dnpep		12 days embryo eyeball cDNA, RIKEN full-length enriched library, clone:D230033J10 product:aspartyl aminopeptidase, full insert sequence.
chr1	75432429	0.93	0.9	2.56	0.89	15.18	15.04	18.42	18.45	10.26	7.83	11.11	9	28.57	11.76	10.62	7.48	TSS	NM_133708	Gmppa	NM_133708	GDP-mannose pyrophosphorylase A
chr1	75446071	3.74	2.7	1.71	3.57	33.93	24.78	54.39	30.1	34.19	26.96	17.36	32	28.57	89.92	20.35	22.43	TSS	NM_183022	Accn4	NM_183022	amiloride-sensitive cation channel 4, pituitary
chr1	75454506	0	0	0	0	0	22.12	51.75	10.68	29.06	2.61	1.39	17	15.31	25.21	29.2	24.3	Gene body	NM_183022	Accn4	NM_183022	amiloride-sensitive cation channel 4, pituitary
chr1	75484791	0	0	0	0	0.89	13.27	21.05	9.71	17.09	0	0	22	23.47	10.08	23.89	18.69	3End	NM_178884	Obsl1	NM_178884	obscurin-like 1
chr1	75503904	3.74	2.7	4.27	5.36	8.93	20.35	15.79	20.39	20.51	19.13	13.19	23	19.39	21.01	22.12	32.71	TSS	NM_010564	Inha	NM_010564	inhibin alpha
chr1	75584644	0	0	0	0	0	13.27	7.89	1.94	7.69	0	0	6	9.18	7.56	15.93	6.54	Intergenic
chr1	75741052	0	0	0	0	0	2.65	7.02	6.8	5.13	0	0	11	10.2	5.04	9.73	5.61	Intergenic
chr1	76721265	11.21	9.01	14.53	16.07	2.68	1.77	2.63	1.94	4.27	5.22	9.72	4	2.04	8.4	7.96	3.74	Intergenic
chr1	77326535	10.28	14.41	8.55	17.86	3.57	6.19	4.39	5.83	4.27	7.83	20.83	11	13.27	9.24	12.39	15.89	Intergenic
chr1	77511829	57.94	43.24	45.3	49.11	23.21	28.32	21.93	15.53	20.51	16.52	25.69	30	20.41	27.73	38.05	26.17	TSS	AK132203	Epha4	NM_007936	Eph receptor A4
chr1	77943896	15.89	13.51	13.68	16.96	6.25	7.96	7.89	5.83	5.98	6.09	3.47	5	9.18	16.81	18.58	3.74	Intergenic
chr1	79694148	25.23	27.93	29.91	28.57	24.11	30.97	15.79	25.24	29.91	16.52	24.31	18	13.27	16.81	15.93	14.02	Intergenic
chr1	80337622	19.63	19.82	16.24	23.21	24.11	16.81	8.77	19.42	17.95	21.74	20.83	11	7.14	8.4	9.73	10.28	TSS	AK129174	Cul3		Mus musculus cullin 3 (Cul3) mRNA, complete cds.
chr1	82605642	11.21	12.61	13.68	10.71	2.68	4.42	4.39	4.85	5.13	3.48	4.86	2	10.2	7.56	8.85	2.8	Gene body	NM_007734	Col4a3	NM_007734	procollagen, type IV, alpha 3
chr1	82605659	8.41	10.81	8.55	7.14	1.79	1.77	1.75	0.97	1.71	2.61	3.47	1	5.1	4.2	1.77	0	Gene body	NM_007734	Col4a3	NM_007734	procollagen, type IV, alpha 3
chr1	82638049	29.91	27.93	28.21	25	17.86	19.47	16.67	18.45	15.38	13.04	18.06	11	24.49	24.37	23.89	11.21	Gene body	AK086939	Col4a3		Mus musculus alpha 3 collagen IV (Col4a3) mRNA, complete cds.
chr1	82836456	40.19	46.85	39.32	43.75	72.32	77.88	77.19	78.64	61.54	82.61	78.47	72	80.61	53.78	69.03	93.46	TSS	AK049400	Hrb	NM_010472	HIV-1 Rev binding protein
chr1	83132579	18.69	23.42	26.5	23.21	8.93	11.5	11.4	9.71	8.55	9.57	19.44	16	18.37	25.21	21.24	14.95	Intergenic
chr1	84034943	50.47	32.43	49.57	36.61	9.82	16.81	14.91	16.5	10.26	51.3	43.06	8	12.24	16.81	24.78	17.76	Gene body	NM_001003948	5033414K04Rik	NM_001003948	hypothetical protein LOC98496
chr1	87819522	50.47	41.44	39.32	41.07	18.75	23.01	21.93	22.33	23.93	21.74	23.61	30	18.37	34.45	43.36	28.04	Intergenic
chr1	87915277	87.85	79.28	85.47	81.25	118.75	120.35	112.28	104.85	111.97	140	130.56	108	126.53	120.17	135.4	200	Intergenic
chr1	88368867	57.94	62.16	53.85	56.25	94.64	83.19	85.96	84.47	99.15	68.7	113.19	107	95.92	53.78	66.37	128.04	Intergenic
chr1	88421561	39.25	48.65	36.75	42.86	20.54	21.24	25.44	21.36	15.38	6.96	31.94	38	10.2	30.25	39.82	29.91	TSS	NM_008972	Ptma	NM_008972	prothymosin alpha
chr1	88920034	22.43	17.12	25.64	16.07	6.25	3.54	7.02	3.88	1.71	13.04	20.14	7	4.08	5.04	7.08	4.67	Gene body	AK029652	Dis3l2	NM_153530	DIS3 mitotic control homolog (S.
chr1	89161061	2.8	3.6	5.98	1.79	27.68	17.7	46.49	26.21	36.75	32.17	11.81	12	16.33	16.81	5.31	37.38	TSS	NM_028889	Efhd1	NM_028889	EF hand domain containing 1
chr1	90598258	0	0.9	0.85	0.89	13.39	7.96	25.44	9.71	18.8	16.52	5.56	3	4.08	5.04	0.88	20.56	TSS	NM_177305	Arl4c	NM_177305	ADP-ribosylation factor-like 7
chr1	90967819	31.78	24.32	28.21	36.61	81.25	53.98	93.86	78.64	68.38	71.3	72.22	82	83.67	26.89	42.48	123.36	TSS	NM_133816	Sh3bp4	NM_133816	SH3-domain binding protein 4
chr1	91000121	17.76	25.23	22.22	16.07	4.46	5.31	8.77	5.83	8.55	12.17	14.58	3	2.04	5.04	0.88	6.54	Gene body	NM_133816	Sh3bp4	NM_133816	SH3-domain binding protein 4
chr1	91410162	23.36	21.62	33.33	34.82	2.68	7.08	2.63	4.85	6.84	12.17	16.67	8	5.1	6.72	10.62	5.61	Gene body	NM_001037136	Centg2	NM_001037136	centaurin, gamma 2 isoform 2
chr1	91410276	14.95	9.01	21.37	14.29	3.57	1.77	0.88	1.94	2.56	4.35	6.94	5	2.04	3.36	0.88	0.93	Gene body	NM_001037136	Centg2	NM_001037136	centaurin, gamma 2 isoform 2
chr1	92164469	12.15	16.22	11.97	12.5	3.57	4.42	3.51	2.91	3.42	10.43	7.64	4	12.24	7.56	15.04	6.54	Intergenic
chr1	92952515	0.93	0.9	0.85	0.89	11.61	10.62	7.89	15.53	5.98	4.35	7.64	10	5.1	8.4	9.73	9.35	Gene body	BC145642	Lrrfip1	NM_008515	leucine rich repeat (in FLII) interacting
chr1	93034193	5.61	6.31	5.98	8.04	16.96	15.93	11.4	14.56	11.97	20	21.53	13	15.31	19.33	19.47	24.3	Intergenic
chr1	93231582	13.08	12.61	17.09	16.07	4.46	7.96	3.51	1.94	8.55	4.35	8.33	6	8.16	8.4	6.19	5.61	Gene body	NM_001033292	Espnl	NM_001033292	espin-like
chr1	93396295	47.66	36.94	45.3	50	64.29	84.96	71.05	96.12	61.54	65.22	63.19	75	93.88	110.08	82.3	89.72	Gene body	NM_028718	Traf3ip1	NM_028718	TNF receptor-associated factor 3 interacting
chr1	94370332	0	0	0	0	8.04	6.19	14.91	7.77	14.53	12.17	0.69	0	4.08	10.08	0.88	17.76	TSS	NM_024197	Ndufa10	NM_024197	NADH dehydrogenase (ubiquinone) 1 alpha
chr1	94504800	12.15	14.41	16.24	17.86	7.14	7.96	6.14	4.85	5.98	11.3	4.17	11	7.14	7.56	10.62	1.87	TSS	NM_146491	Olfr1410	NM_146491	olfactory receptor 1410
chr1	94538667	19.63	21.62	23.08	19.64	6.25	10.62	6.14	5.83	5.98	14.78	16.67	8	10.2	10.08	13.27	12.15	TSS	AK003315	AK003315		Mus musculus 18-day embryo whole body cDNA, RIKEN full-length enriched library, clone:1110002M09 product:unclassifiable, full insert sequence.
chr1	94548753	12.15	12.61	10.26	12.5	5.36	3.54	5.26	4.85	5.13	4.35	6.25	10	9.18	7.56	6.19	9.35	Intergenic
chr1	94930733	16.82	15.32	17.09	13.39	23.21	29.2	20.18	32.04	23.93	31.3	25	22	31.63	31.09	28.32	31.78	Gene body	AK147640	Kif1a	NM_008440	kinesin family member 1A
chr1	95031965	56.07	73.87	47.01	62.5	24.11	22.12	26.32	17.48	23.93	14.78	40.28	41	19.39	33.61	43.36	35.51	TSS	NM_016702	Agxt	NM_016702	alanine-glyoxylate aminotransferase
chr1	95032351	24.3	20.72	24.79	16.96	5.36	3.54	7.02	6.8	5.98	7.83	7.64	16	2.04	5.88	10.62	3.74	TSS	NM_016702	Agxt	NM_016702	alanine-glyoxylate aminotransferase
chr1	95035480	27.1	27.03	21.37	25.89	18.75	14.16	14.91	11.65	11.97	10.43	16.67	14	12.24	10.92	15.04	11.21	Gene body	NM_016702	Agxt	NM_016702	alanine-glyoxylate aminotransferase
chr1	95132588	0	0.9	0.85	0	5.36	1.77	5.26	6.8	5.13	6.96	9.72	8	9.18	5.04	9.73	20.56	TSS	NM_172463	Sned1	NM_172463	sushi, nidogen and EGF-like domains 1
chr1	95531733	41.12	39.64	34.19	42.86	60.71	61.06	81.58	61.17	65.81	49.57	59.03	73	47.96	63.87	52.21	92.52	TSS	NM_021537	Stk25	NM_021537	serine/threonine kinase 25
chr1	95583413	55.14	72.97	59.83	57.14	118.75	91.15	119.3	120.39	121.37	115.65	115.97	115	103.06	63.87	65.49	143.93	TSS	NM_016778	Bok	NM_016778	Bcl-2-related ovarian killer protein
chr1	95585075	52.34	38.74	40.17	50.89	8.93	13.27	10.53	8.74	17.95	21.74	15.28	15	4.08	20.17	23.01	10.28	Gene body	NM_016778	Bok	NM_016778	Bcl-2-related ovarian killer protein
chr1	95585179	26.17	22.52	22.22	23.21	4.46	5.31	4.39	5.83	8.55	6.96	10.42	2	3.06	5.04	3.54	4.67	Gene body	NM_016778	Bok	NM_016778	Bcl-2-related ovarian killer protein
chr1	99094973	45.79	68.47	48.72	48.21	22.32	20.35	21.93	17.48	23.08	7.83	34.72	10	19.39	18.49	15.04	15.89	Intergenic
chr1	99946766	6.54	9.01	12.82	9.82	2.68	0.88	0.88	1.94	1.71	2.61	2.08	3	1.02	4.2	3.54	0.93	TSS	AK021003	AK021003		Mus musculus adult male corpora quadrigemina cDNA, RIKEN full-length enriched library, clone:B230216N24 product:unclassifiable, full insert sequence.
chr1	101668995	0	0	0.85	0	7.14	6.19	7.02	7.77	15.38	13.04	2.08	0	0	7.56	1.77	6.54	TSS	NM_172851	C230078M14Rik	NM_172851	contactin associated protein-like 5
chr1	104354946	11.21	11.71	14.53	10.71	4.46	5.31	4.39	5.83	3.42	8.7	4.86	7	15.31	9.24	7.08	9.35	Intergenic
chr1	104998640	9.35	8.11	9.4	13.39	2.68	1.77	2.63	2.91	2.56	5.22	2.78	5	4.08	4.2	0.88	0	Intergenic
chr1	107887353	34.58	28.83	28.21	33.93	14.29	16.81	11.4	12.62	17.95	11.3	17.36	22	9.18	13.45	22.12	9.35	TSS	AK173248	Zcchc2		Zinc finger CCHC domain-containing protein 2 (Fragment).
chr1	107888180	14.02	13.51	15.38	11.61	12.5	13.27	10.53	7.77	7.69	6.96	12.5	7	6.12	4.2	6.19	4.67	TSS	AK173248	Zcchc2		Zinc finger CCHC domain-containing protein 2 (Fragment).
chr1	116092709	10.28	11.71	8.55	13.39	2.68	4.42	2.63	2.91	5.13	6.09	4.17	9	8.16	10.92	5.31	11.21	Intergenic
chr1	118560924	7.48	5.41	11.97	13.39	0	0.88	0	0	0.85	0.87	0.69	0	0	0	0	0.93	Intergenic
chr1	118962780	16.82	15.32	22.22	15.18	6.25	6.19	5.26	4.85	6.84	6.09	7.64	7	8.16	13.45	12.39	5.61	Intergenic
chr1	120530786	17.76	15.32	17.95	15.18	10.71	7.96	10.53	8.74	8.55	12.17	11.81	9	21.43	15.97	13.27	2.8	Gene body	AK007654	Crtr-1		Mus musculus transcription repressor CRTR-1 (Crtr-1) mRNA, complete cds.
chr1	120578740	21.5	23.42	25.64	19.64	14.29	12.39	8.77	10.68	11.11	8.7	23.61	17	9.18	10.08	18.58	14.95	Gene body	NM_023755	Tcfcp2l1	NM_023755	transcription repressor CRTR-1
chr1	120921918	11.21	9.91	12.82	9.82	8.04	4.42	7.89	5.83	5.98	13.91	4.86	2	3.06	4.2	3.54	3.74	Gene body	AM262741	Gli2		Mus musculus partial mRNA for GLI-Kruppel family member (Gli2 gene), delta 3-5 splice form.
chr1	121091843	66.36	54.05	52.14	53.57	8.93	14.16	17.54	11.65	19.66	20	27.78	23	3.06	30.25	23.89	14.02	Intergenic
chr1	121318838	7.48	9.91	5.98	7.14	19.64	22.12	35.09	23.3	21.37	32.17	12.5	25	27.55	15.13	13.27	30.84	TSS	NM_008381	Inhbb	NM_008381	inhibin beta-B
chr1	121401681	128.04	137.84	140.17	146.43	189.29	180.53	207.02	210.68	185.47	127.83	177.78	190	127.55	140.34	146.02	178.5	TSS	NM_022327	Ralb	NM_022327	v-ral simian leukemia viral oncogene homolog B
chr1	121418430	20.56	21.62	25.64	31.25	4.46	4.42	7.89	6.8	10.26	3.48	21.53	8	1.02	8.4	8.85	6.54	Gene body	AK053246	AK053246		Mus musculus 0 day neonate lung cDNA, RIKEN full-length enriched library, clone:E030050D17 product:unclassifiable, full insert sequence.
chr1	121734278	20.56	24.32	19.66	21.43	18.75	21.24	8.77	11.65	15.38	8.7	13.19	15	13.27	13.45	10.62	12.15	TSS	NM_019933	Ptpn4	NM_019933	protein tyrosine phosphatase, non-receptor type
chr1	121894064	0	0	0	0	18.75	8.85	8.77	7.77	15.38	9.57	5.56	3	3.06	11.76	0	11.21	Intergenic
chr1	122291045	28.04	29.73	24.79	23.21	13.39	17.7	13.16	11.65	12.82	13.04	15.28	12	13.27	24.37	22.12	9.35	Intergenic
chr1	122409371	20.56	16.22	18.8	16.96	15.18	12.39	7.02	8.74	11.11	9.57	11.11	8	6.12	6.72	7.08	6.54	Intergenic
chr1	122498697	64.49	89.19	63.25	56.25	63.39	75.22	71.93	62.14	76.07	108.7	99.31	97	112.24	120.17	111.5	100	TSS	NM_010133	En1	NM_010133	engrailed 1
chr1	122510425	24.3	22.52	23.93	21.43	44.64	52.21	33.33	31.07	63.25	51.3	47.22	49	55.1	39.5	43.36	50.47	Intergenic
chr1	122510427	63.55	76.58	70.94	73.21	108.04	125.66	107.02	109.71	119.66	118.26	81.25	90	135.71	80.67	83.19	113.08	Intergenic
chr1	123223984	104.67	95.5	91.45	92.86	57.14	69.91	50.88	60.19	52.99	30.43	66.67	81	36.73	60.5	85.84	39.25	TSS	AK050394	Insig2	NM_178082	INSIG-2 membrane protein
chr1	127536310	31.78	17.12	30.77	23.21	5.36	4.42	6.14	7.77	3.42	37.39	31.25	8	6.12	11.76	1.77	4.67	Intergenic
chr1	129260388	44.86	59.46	46.15	41.07	8.93	9.73	14.91	10.68	10.26	38.26	45.14	16	9.18	36.13	33.63	19.63	Gene body	AK049587	Mgat5	NM_145128	mannoside acetylglucosaminyltransferase 5
chr1	129574426	3.74	6.31	5.13	3.57	25	11.5	23.68	15.53	21.37	22.61	9.03	11	18.37	3.36	2.65	26.17	TSS	NM_028135	Tmem163	NM_028135	hypothetical protein LOC72160
chr1	129625572	15.89	10.81	14.53	14.29	6.25	3.54	4.39	4.85	5.13	6.96	16.67	10	2.04	4.2	6.19	7.48	TSS	NM_001033041	Acmsd	NM_001033041	amino carboxymuconate semialdehyde
chr1	132358871	0.93	1.8	0.85	0.89	12.5	10.62	14.91	5.83	12.82	19.13	0.69	3	4.08	15.97	3.54	23.36	TSS	NM_010016	Cd55	NM_010016	decay accelerating factor 1
chr1	132762587	15.89	27.03	19.66	29.46	4.46	3.54	4.39	2.91	5.13	18.26	17.36	7	15.31	10.08	7.08	6.54	TSS	NM_026976	Faim3	NM_026976	Fas apoptotic inhibitory molecule
chr1	133061104	25.23	28.83	39.32	33.04	7.14	14.16	7.89	8.74	10.26	10.43	11.11	8	8.16	15.13	19.47	7.48	Intergenic
chr1	133512004	12.15	15.32	17.95	18.75	5.36	3.54	4.39	9.71	5.13	5.22	7.64	6	4.08	5.88	2.65	2.8	Intergenic
chr1	133662378	57.01	45.05	57.26	56.25	18.75	29.2	22.81	24.27	25.64	29.57	27.78	16	20.41	31.93	51.33	13.08	Gene body	NM_177243	Slc26a9	NM_177243	solute carrier family 26, member 9
chr1	133877048	39.25	50.45	47.86	41.96	21.43	25.66	16.67	17.48	14.53	16.52	39.58	33	8.16	20.17	37.17	23.36	Gene body	AK035428	Slc45a3	NM_145977	solute carrier family 45, member 3
chr1	134216227	28.97	36.04	40.17	33.93	10.71	9.73	13.16	10.68	11.97	19.13	21.53	25	8.16	13.45	28.32	15.89	Gene body	BC046833	Nuak2	NM_028778	NUAK family, SNF1-like kinase, 2
chr1	134942229	39.25	36.04	36.75	53.57	11.61	18.58	12.28	10.68	15.38	17.39	22.22	26	19.39	26.89	34.51	12.15	TSS	BC132141	Pik3c2b		Mus musculus ES cells cDNA, RIKEN full-length enriched library, clone:C330011J12 product:hypothetical Phosphoinositide 3-kinase family, ras-binding domain containing protein, full insert sequence.
chr1	134943274	14.02	17.12	16.24	17.86	6.25	15.04	6.14	1.94	11.11	5.22	9.03	10	6.12	7.56	7.08	6.54	TSS	BC132141	Pik3c2b		Mus musculus ES cells cDNA, RIKEN full-length enriched library, clone:C330011J12 product:hypothetical Phosphoinositide 3-kinase family, ras-binding domain containing protein, full insert sequence.
chr1	135122796	10.28	10.81	11.11	8.04	2.68	2.65	3.51	2.91	2.56	6.96	4.17	4	2.04	1.68	6.19	3.74	Intergenic
chr1	135153144	14.02	12.61	17.09	16.07	4.46	6.19	4.39	5.83	6.84	6.96	6.25	9	5.1	4.2	9.73	3.74	Gene body	AK145464	AK145464		Mus musculus adult male urinary bladder cDNA, RIKEN full-length enriched library, clone:9530007G09 product:unclassifiable, full insert sequence.
chr1	135159930	31.78	28.83	39.32	41.96	14.29	9.73	13.16	9.71	11.11	7.83	27.78	18	5.1	13.45	28.32	5.61	Gene body	AK145464	AK145464		Mus musculus adult male urinary bladder cDNA, RIKEN full-length enriched library, clone:9530007G09 product:unclassifiable, full insert sequence.
chr1	135818159	33.64	32.43	35.04	36.61	18.75	16.81	13.16	21.36	20.51	12.17	20.83	18	15.31	15.97	18.58	14.02	TSS	NM_054077	Prelp	NM_054077	proline arginine-rich end leucine-rich repeat
chr1	136131008	93.46	88.29	111.11	94.64	57.14	67.26	54.39	53.4	64.96	30.43	68.75	57	32.65	50.42	82.3	62.62	TSS	NM_001008533	Adora1	NM_001008533	adenosine A1 receptor
chr1	136131992	0	0.9	0	0.89	13.39	7.08	13.16	4.85	11.11	6.96	2.08	3	5.1	4.2	2.65	10.28	TSS	NM_001008533	Adora1	NM_001008533	adenosine A1 receptor
chr1	136410011	10.28	9.91	6.84	12.5	73.21	27.43	42.98	59.22	41.88	48.7	29.86	37	63.27	6.72	11.5	45.79	Intergenic
chr1	136452935	6.54	7.21	12.82	9.82	57.14	28.32	64.04	35.92	55.56	54.78	46.53	53	44.9	54.62	64.6	66.36	Intergenic
chr1	136624055	32.71	35.14	36.75	35.71	20.54	20.35	16.67	15.53	17.95	17.39	15.28	19	19.39	32.77	38.05	20.56	Gene body	AB036514	syt II		Mus musculus mRNA for synaptotagmin II, partial cds.
chr1	136799754	12.15	9.01	24.79	16.07	1.79	0.88	5.26	0	4.27	3.48	1.39	0	1.02	2.52	0	0	Gene body	NM_001081307	Ppp1r12b	NM_001081307	protein phosphatase 1, regulatory (inhibitor)
chr1	137077636	10.28	10.81	15.38	9.82	0	4.42	5.26	1.94	4.27	6.09	4.17	2	4.08	4.2	1.77	2.8	Intergenic
chr1	137091209	28.04	27.93	23.08	27.68	3.57	9.73	5.26	9.71	9.4	8.7	11.81	9	4.08	6.72	7.08	7.48	Intergenic
chr1	137180363	34.58	34.23	35.04	26.79	71.43	58.41	85.09	86.41	68.38	68.7	82.64	76	58.16	52.1	53.98	114.02	TSS	NM_145417	Rnpep	NM_145417	arginyl aminopeptidase (aminopeptidase B)
chr1	137180436	8.41	5.41	6.84	5.36	33.93	21.24	25.44	30.1	24.79	19.13	18.75	32	25.51	2.52	21.24	43.93	TSS	NM_145417	Rnpep	NM_145417	arginyl aminopeptidase (aminopeptidase B)
chr1	137410747	28.97	46.85	47.01	47.32	8.04	10.62	9.65	6.8	13.68	14.78	22.22	13	4.08	26.05	31.86	10.28	Intergenic
chr1	138800554	23.36	18.92	23.08	22.32	8.93	9.73	8.77	10.68	13.68	6.96	6.25	9	11.22	6.72	23.01	6.54	Gene body	AK054487	Nr5a2	NM_030676	nuclear receptor subfamily 5, group A, member 2
chr1	140514490	58.88	63.06	56.41	58.04	41.07	36.28	36.84	33.98	40.17	20	23.61	37	25.51	33.61	58.41	14.02	TSS	NM_021605	Nek7	NM_021605	NIMA (never in mitosis gene a)-related expressed
chr1	141352089	18.69	15.32	14.53	16.96	21.43	19.47	21.93	17.48	15.38	19.13	20.14	27	29.59	31.93	30.97	27.1	TSS	AK052515	Asp		Mus musculus abnormal spindle (Asp) mRNA, complete cds.
chr1	141675577	11.21	8.11	11.97	8.04	0.89	0.88	0.88	0	0.85	6.96	4.86	3	3.06	7.56	0.88	4.67	Gene body	NM_001029977	EG214403	NM_001029977	complement factor H-related protein C
chr1	143887095	0.93	0.9	0.85	0	9.82	7.08	12.28	6.8	11.11	17.39	16.67	11	15.31	15.13	12.39	16.82	Intergenic
chr1	145624078	0.93	0.9	3.42	2.68	15.18	38.05	35.09	19.42	18.8	22.61	2.78	3	6.12	18.49	0.88	27.1	TSS	NM_013835	Trove2	NM_013835	TROVE domain family, member 2
chr1	145850644	62.62	74.77	58.12	62.5	38.39	38.05	30.7	31.07	40.17	20	52.08	44	26.53	36.97	79.65	32.71	TSS	NM_009061	Rgs2	NM_009061	regulator of G-protein signaling 2
chr1	152550468	26.17	27.03	29.06	31.25	20.54	15.04	14.04	15.53	14.53	11.3	25.69	12	30.61	17.65	12.39	23.36	Gene body	AK143102	AK143102		Mus musculus 0 day neonate eyeball cDNA, RIKEN full-length enriched library, clone:E130102O10 product:unclassifiable, full insert sequence.
chr1	153602932	0	0.9	0	0	15.18	8.85	14.91	5.83	13.68	13.04	1.39	0	0	10.08	0	14.02	TSS	NM_001039644	Edem3	NM_001039644	ER degradation enhancer, mannosidase alpha-like
chr1	154233704	0	0.9	0	0	8.93	11.5	11.4	5.83	3.42	11.3	8.33	11	8.16	2.52	3.54	19.63	TSS	NM_025677	5730449L18Rik	NM_025677	hypothetical protein LOC66637
chr1	154370587	3.74	3.6	5.13	3.57	8.93	14.16	11.4	12.62	4.27	3.48	6.25	19	11.22	12.61	8.85	12.15	Gene body	NM_016846	Rgl1	NM_016846	ral guanine nucleotide dissociation
chr1	155747551	0	0.9	0	0	8.93	8.85	21.05	8.74	11.97	13.91	5.56	3	0	7.56	1.77	7.48	TSS	AK044033	AK044033		Mus musculus 10 days neonate cortex cDNA, RIKEN full-length enriched library, clone:A830082G19 product:weakly similar to CE9 PROTEIN [Canis familiaris], full insert sequence.
chr1	156153785	27.1	25.23	29.91	25	15.18	13.27	13.16	11.65	10.26	18.26	15.28	17	21.43	20.17	15.04	6.54	Intergenic
chr1	156536453	56.07	52.25	42.74	39.29	14.29	18.58	14.91	15.53	20.51	15.65	24.31	22	17.35	33.61	62.83	17.76	Gene body	NM_009782	Cacna1e	NM_009782	calcium channel, voltage-dependent, R type,
chr1	156731752	0	0	0	0	42.86	14.16	14.04	21.36	26.5	33.04	27.78	17	27.55	0	12.39	42.99	Intergenic
chr1	158139147	0	0	0	0.89	9.82	15.04	3.51	6.8	12.82	7.83	4.86	6	10.2	14.29	7.96	3.74	Intergenic
chr1	159438238	51.4	56.76	57.26	52.68	14.29	18.58	18.42	13.59	19.66	23.48	31.25	37	12.24	21.01	29.2	8.41	TSS	AK173302	Sec16b	NM_033354	SEC16 homolog B
chr1	159452973	11.21	16.22	9.4	12.5	0.89	1.77	1.75	2.91	0.85	4.35	7.64	7	0	2.52	4.42	0	Intergenic
chr1	160527452	0	0.9	0	0	13.39	30.97	12.28	8.74	22.22	13.91	16.67	14	12.24	26.89	36.28	14.02	Gene body	AK138576	Astn1	NM_007495	astrotactin 1
chr1	160553759	0	0	0	0.89	6.25	13.27	6.14	0	14.53	6.96	4.86	6	12.24	9.24	9.73	8.41	Intergenic
chr1	161504732	24.3	20.72	23.93	18.75	10.71	9.73	8.77	9.71	11.97	13.04	14.58	21	14.29	10.92	15.93	6.54	Gene body	NM_022312	Tnr	NM_022312	tenascin R
chr1	162786245	28.04	21.62	38.46	22.32	7.14	3.54	7.89	4.85	6.84	9.57	17.36	7	5.1	8.4	23.01	9.35	Intergenic
chr1	162836768	0.93	1.8	1.71	0.89	14.29	10.62	14.04	9.71	5.13	5.22	4.86	9	11.22	4.2	3.54	0.93	TSS	NM_001024952	Rc3h1	NM_001024952	roquin
chr1	163180747	14.02	16.22	18.8	18.75	8.04	11.5	4.39	6.8	10.26	8.7	5.56	7	8.16	5.88	7.96	9.35	TSS	NM_007453	Prdx6	NM_007453	peroxiredoxin 6
chr1	164828864	25.23	21.62	27.35	25	4.46	6.19	6.14	8.74	5.13	4.35	7.64	10	2.04	12.61	12.39	7.48	TSS	AK009224	Fmo2		Mus musculus adult male tongue cDNA, RIKEN full-length enriched library, clone:2310008D08 product:flavin containing monooxygenase 2, full insert sequence.
chr1	164912637	7.48	11.71	15.38	8.04	1.79	0.88	0	1.94	0.85	7.83	8.33	8	2.04	2.52	3.54	0.93	TSS	NM_008030	Fmo3	NM_008030	flavin containing monooxygenase 3
chr1	166635029	42.06	42.34	38.46	45.54	50	46.9	47.37	50.49	52.99	43.48	43.75	36	29.59	33.61	37.17	35.51	Intergenic
chr1	166698331	14.95	11.71	12.82	14.29	17.86	23.89	25.44	22.33	17.95	20	20.14	23	24.49	26.89	21.24	26.17	Intergenic
chr1	166949034	16.82	18.02	17.95	16.96	9.82	14.16	7.89	4.85	8.55	7.83	13.89	9	10.2	7.56	9.73	7.48	Intergenic
chr1	167259766	17.76	15.32	11.11	17.86	2.68	4.42	4.39	4.85	4.27	4.35	4.17	6	4.08	14.29	11.5	7.48	Gene body	AK004618	Iqwd1		Adult male lung cDNA, RIKEN full-length enriched library, clone:1200006M05 product:similar to PC326 PROTEIN.
chr1	167932108	0	0	0	0.89	8.04	6.19	23.68	7.77	9.4	9.57	3.47	1	3.06	5.88	3.54	10.28	TSS	NM_011137	Pou2f1	NM_011137	POU domain, class 2, transcription factor 1
chr1	168185231	6.54	6.31	7.69	8.04	19.64	5.31	18.42	9.71	11.11	22.61	10.42	14	15.31	14.29	20.35	17.76	Intergenic
chr1	168265490	14.95	21.62	14.53	15.18	11.61	14.16	13.16	13.59	15.38	11.3	34.03	21	23.47	17.65	23.89	21.5	Intergenic
chr1	168313584	9.35	8.11	14.53	7.14	0.89	0.88	2.63	0.97	2.56	6.96	4.86	1	0	1.68	2.65	0	Gene body	AK050649	Tada1l		Mus musculus adult male hippocampus cDNA, RIKEN full-length enriched library, clone:2900026B15 product:hypothetical protein, full insert sequence.
chr1	169215147	7.48	14.41	5.13	6.25	16.96	13.27	10.53	10.68	14.53	13.91	7.64	6	7.14	4.2	5.31	4.67	TSS	NM_030724	Uck2	NM_030724	uridine-cytidine kinase 2
chr1	169289131	14.95	8.11	12.82	10.71	0.89	0	1.75	0.97	0	8.7	14.58	4	1.02	3.36	2.65	0	Gene body	NM_019993	Aldh9a1	NM_019993	aldehyde dehydrogenase 9, subfamily A1
chr1	169296172	40.19	31.53	36.75	34.82	7.14	9.73	9.65	13.59	7.69	8.7	20.83	13	17.35	15.13	29.2	13.08	Gene body	NM_019993	Aldh9a1	NM_019993	aldehyde dehydrogenase 9, subfamily A1
chr1	169986829	39.25	42.34	46.15	52.68	16.96	17.7	12.28	13.59	22.22	13.04	25	21	21.43	21.01	35.4	9.35	Intergenic
chr1	170406439	12.15	10.81	14.53	14.29	48.21	46.02	34.21	52.43	47.01	65.22	47.22	60	54.08	58.82	65.49	62.62	Intergenic
chr1	170593037	16.82	21.62	17.95	19.64	8.04	11.5	7.02	7.77	10.26	10.43	10.42	11	13.27	20.17	17.7	7.48	Intergenic
chr1	171413271	13.08	14.41	17.09	14.29	2.68	3.54	1.75	2.91	4.27	21.74	11.81	4	3.06	6.72	1.77	0	Intergenic
chr1	172105350	0.93	0	0	0	14.29	13.27	16.67	3.88	14.53	21.74	4.86	2	3.06	9.24	1.77	9.35	TSS	AK163314	Uap1	NM_133806	UDP-N-acetylglucosamine pyrophosphorylase 1
chr1	172145138	0	0.9	0	0	6.25	7.96	10.53	5.83	19.66	26.09	6.25	7	3.06	11.76	5.31	9.35	TSS	NM_010633	Uhmk1	NM_010633	U2AF homology motif (UHM) kinase 1
chr1	172245333	0	0	0	0	0	17.7	3.51	0	16.24	0	13.89	6	9.18	6.72	8.85	4.67	3End	AK122290	Nos1ap		Mus musculus adult male medulla oblongata cDNA, RIKEN full-length enriched library, clone:6330408P19 product:weakly similar to CARBOXYL-TERMINAL PDZ LIGAND OF NEURONAL NITRIC OXIDE SYNTHASE [Rattus norvegicus], full insert sequence.
chr1	172261865	0	0	0.85	0	10.71	42.48	25.44	21.36	23.93	30.43	28.47	21	30.61	42.02	33.63	31.78	TSS	AK122290	Nos1ap		Mus musculus adult male medulla oblongata cDNA, RIKEN full-length enriched library, clone:6330408P19 product:weakly similar to CARBOXYL-TERMINAL PDZ LIGAND OF NEURONAL NITRIC OXIDE SYNTHASE [Rattus norvegicus], full insert sequence.
chr1	172420046	24.3	12.61	11.11	17.86	0.89	0.88	0.88	3.88	2.56	11.3	15.28	6	2.04	6.72	4.42	2.8	Gene body	NM_027528	Nos1ap	NM_027528	C-terminal PDZ domain ligand of neuronal nitric
chr1	173081328	31.78	37.84	35.04	45.54	20.54	17.7	16.67	13.59	14.53	8.7	18.06	24	13.27	15.13	35.4	13.08	TSS	NM_008623	Mpz	NM_008623	myelin protein zero
chr1	173094580	22.43	26.13	21.37	21.43	15.18	15.04	9.65	34.95	9.4	23.48	20.83	16	13.27	11.76	15.04	12.15	Intergenic
chr1	173126100	0	0.9	0.85	0	9.82	7.96	15.79	13.59	5.98	8.7	2.78	6	6.12	3.36	1.77	28.04	TSS	NM_025557	Pcp4l1	NM_025557	Purkinje cell protein 4-like 1
chr1	173167750	19.63	21.62	15.38	24.11	61.61	60.18	77.19	46.6	53.85	18.26	28.47	62	32.65	43.7	53.98	59.81	Gene body	NM_153064	Ndufs2	NM_153064	NADH dehydrogenase (ubiquinone) Fe-S protein 2
chr1	173259290	14.02	12.61	15.38	14.29	4.46	4.42	6.14	5.83	5.13	2.61	4.86	9	1.02	5.04	7.08	5.61	TSS	NM_011615	Dedd	NM_011615	death effector domain-containing
chr1	173290969	49.53	39.64	60.68	51.79	13.39	24.78	14.91	10.68	15.38	13.91	16.67	17	17.35	27.73	46.02	19.63	TSS	NM_001033039	Klhdc9	NM_001033039	kelch domain containing 9
chr1	173476963	23.36	18.92	17.09	23.21	37.5	56.64	24.56	37.86	57.26	46.09	53.47	41	51.02	39.5	55.75	49.53	Intergenic
chr1	173957429	0	0	0	0	6.25	5.31	6.14	4.85	5.13	4.35	2.08	5	8.16	10.08	10.62	10.28	TSS	NM_033509	Vangl2	NM_033509	loop tail associated protein
chr1	174306499	0.93	0	0	0	21.43	15.93	9.65	16.5	11.11	10.43	17.36	15	11.22	10.92	12.39	13.08	TSS	NM_026234	Pigm	NM_026234	phosphatidylinositol glycan anchor biosynthesis,
chr1	174307190	8.41	9.01	11.97	15.18	48.21	25.66	45.61	59.22	41.03	27.83	29.17	32	33.67	17.65	23.01	75.7	TSS	NM_026234	Pigm	NM_026234	phosphatidylinositol glycan anchor biosynthesis,
chr1	174474013	0	0	0.85	0	16.07	8.85	7.89	15.53	17.09	0.87	16.67	19	17.35	14.29	23.01	21.5	Gene body	AK006449	Ccdc19		Adult male testis cDNA, RIKEN full-length enriched library, clone:1700028D05 product:nasopharyngeal epithelium specific protein 1, full insert sequence.
chr1	174627404	28.04	27.03	20.51	20.54	5.36	9.73	7.89	9.71	8.55	7.83	10.42	7	10.2	5.88	12.39	5.61	TSS	NM_007768	Crp	NM_007768	C-reactive protein, petaxin related
chr1	176432304	61.68	53.15	55.56	46.43	102.68	84.96	107.02	89.32	109.4	117.39	73.61	66	120.41	81.51	67.26	96.26	TSS	BC094606	Fmn2	NM_019445	formin 2
chr1	177220658	17.76	18.92	15.38	14.29	8.04	7.08	7.89	9.71	8.55	4.35	15.97	14	10.2	9.24	17.7	9.35	Gene body	NM_011880	Rgs7	NM_011880	regulator of G protein signaling 7
chr1	177268003	14.02	14.41	17.95	19.64	5.36	7.96	6.14	7.77	4.27	13.04	11.11	3	8.16	10.08	14.16	1.87	Gene body	NM_011880	Rgs7	NM_011880	regulator of G protein signaling 7
chr1	177810856	12.15	9.01	11.11	10.71	4.46	3.54	2.63	2.91	4.27	8.7	6.94	8	5.1	5.88	8.85	3.74	TSS	NM_012012	Exo1	NM_012012	exonuclease 1
chr1	179726310	0	0.9	0	0	11.61	7.96	9.65	3.88	11.97	8.7	0	1	2.04	2.52	0	5.61	TSS	NM_007422	Adss	NM_007422	adenylosuccinate synthetase, non muscle
chr1	179726597	0	0.9	0	0	10.71	9.73	13.16	3.88	13.68	21.74	0	5	3.06	5.04	0	11.21	TSS	NM_007422	Adss	NM_007422	adenylosuccinate synthetase, non muscle
chr1	180206554	0.93	0.9	0	0	10.71	4.42	16.67	16.5	13.68	19.13	7.64	10	14.29	1.68	3.54	12.15	Intergenic
chr1	180267214	0	0	0	0	11.61	7.08	22.81	12.62	9.4	11.3	2.78	4	0	5.04	0	4.67	TSS	AK029944	Hnrnpu	NM_016805	heterogeneous nuclear ribonucleoprotein U
chr1	180267366	0	0	0	0	18.75	7.96	16.67	28.16	9.4	11.3	6.25	4	9.18	10.92	0	32.71	TSS	AK029944	Hnrnpu	NM_016805	heterogeneous nuclear ribonucleoprotein U
chr1	182198831	26.17	24.32	29.91	29.46	16.07	16.81	13.16	18.45	17.09	12.17	15.97	17	8.16	12.61	30.09	6.54	Intergenic
chr1	182355571	6.54	18.92	11.11	17.86	2.68	3.54	3.51	0	3.42	2.61	10.42	1	1.02	0	0	0	3End	NM_001081175	Itpkb	NM_001081175	inositol 1,4,5-trisphosphate 3-kinase B
chr1	182698831	0	0	0	0	35.71	38.94	30.7	33.01	43.59	46.09	39.58	44	32.65	30.25	47.79	49.53	Intergenic
chr1	182742734	9.35	9.91	4.27	6.25	59.82	22.12	54.39	62.14	43.59	38.26	47.22	41	30.61	1.68	6.19	51.4	TSS	NM_008210	H3f3a	NM_008210	H3 histone, family 3A
chr1	182867122	23.36	38.74	26.5	28.57	83.04	119.47	153.51	74.76	84.62	85.22	70.83	113	100	157.98	107.96	100.93	TSS	NM_010094	Lefty1	NM_010094	left right determination factor 1
chr1	182872075	113.08	122.52	121.37	125.89	176.79	163.72	166.67	163.11	169.23	133.04	131.94	173	141.84	115.97	109.73	176.64	TSS	NM_144794	Tmem63a	NM_144794	transmembrane protein 63a
chr1	183020346	19.63	20.72	21.37	25.89	8.04	6.19	7.02	5.83	11.11	6.09	13.89	7	5.1	7.56	17.7	4.67	Intergenic
chr1	183081167	17.76	26.13	17.09	15.18	87.5	49.56	71.05	58.25	46.15	40	46.53	72	52.04	26.05	14.16	94.39	TSS	NM_030131	Cnih4	NM_030131	cornichon homolog 4
chr1	183184534	14.02	12.61	12.82	14.29	28.57	24.78	27.19	29.13	22.22	19.13	19.44	34	22.45	15.97	26.55	30.84	Intergenic
chr1	183275957	0	0	1.71	0.89	16.96	10.62	7.02	9.71	8.55	12.17	4.86	13	12.24	14.29	34.51	13.08	Intergenic
chr1	183781807	25.23	18.92	23.93	26.79	4.46	5.31	7.02	9.71	8.55	28.7	25	4	6.12	5.88	4.42	4.67	Intergenic
chr1	184179836	24.3	19.82	25.64	20.54	9.82	12.39	23.68	24.27	9.4	8.7	24.31	12	11.22	13.45	14.16	10.28	Intergenic
chr1	184235419	0	0	0	0	10.71	6.19	8.77	7.77	8.55	6.09	2.78	7	4.08	10.92	7.08	10.28	3End	AK019698	AK019698		Mus musculus adult male testis cDNA, RIKEN full-length enriched library, clone:1700047M11 product:unclassifiable, full insert sequence.
chr1	184271523	62.62	57.66	54.7	55.36	70.54	77.88	79.82	78.64	87.18	71.3	72.22	89	59.18	65.55	69.03	80.37	TSS	NM_175127	Fbxo28	NM_175127	F-box protein 28
chr1	184921258	57.94	55.86	48.72	53.57	83.93	89.38	94.74	88.35	102.56	119.13	63.89	55	83.67	39.5	45.13	64.49	Intergenic
chr1	185931485	18.69	18.92	21.37	23.21	8.93	6.19	11.4	8.74	8.55	6.09	7.64	7	2.04	15.97	10.62	0.93	Intergenic
chr1	186090242	15.89	12.61	13.68	15.18	4.46	4.42	5.26	4.85	4.27	5.22	6.94	2	6.12	15.97	7.96	8.41	Intergenic
chr1	186556808	35.51	39.64	38.46	36.61	14.29	14.16	15.79	13.59	16.24	15.65	10.42	8	8.16	27.73	21.24	3.74	TSS	NM_008250	Hlx	NM_008250	H2.0-like homeobox
chr1	187122616	19.63	27.03	23.93	28.57	9.82	8.85	10.53	10.68	5.98	25.22	20.83	8	6.12	5.88	11.5	8.41	Gene body	BC037123	Iars2	NM_198653	isoleucine-tRNA synthetase 2, mitochondrial
chr1	187555102	13.08	18.02	17.95	13.39	5.36	5.31	3.51	3.88	6.84	2.61	2.08	8	9.18	4.2	16.81	0.93	Intergenic
chr1	187598875	18.69	15.32	14.53	17.86	9.82	7.08	6.14	7.77	9.4	8.7	10.42	8	9.18	16.81	9.73	6.54	Intergenic
chr1	188525421	9.35	11.71	11.97	11.61	7.14	5.31	4.39	4.85	6.84	1.74	7.64	4	5.1	2.52	3.54	2.8	Gene body	AK141552	Tgfb2	NM_009367	transforming growth factor, beta 2
chr1	189743036	48.6	31.53	45.3	34.82	6.25	8.85	9.65	10.68	9.4	10.43	18.06	6	5.1	21.01	23.89	12.15	Intergenic
chr1	190702517	15.89	12.61	17.95	23.21	4.46	4.42	2.63	14.56	3.42	18.26	15.28	5	3.06	6.72	5.31	3.74	Intergenic
chr1	191116752	23.36	27.93	23.93	21.43	8.04	10.62	8.77	13.59	9.4	11.3	16.67	15	19.39	10.92	21.24	17.76	Gene body	AY736359	Kcnk2	NM_010607	potassium channel, subfamily K, member 2
chr1	191512391	14.95	16.22	9.4	15.18	66.96	44.25	52.63	66.02	45.3	46.09	43.06	46	46.94	29.41	18.58	62.62	TSS	AK165236	Cenpf		Adult retina cDNA, RIKEN full-length enriched library, clone:A930101O15 product:weakly similar to CENP-F KINETOCHORE PROTEIN (CENTROMERE PROTEIN F) (MITOSIN) (AH ANTIGEN) (Fragment).
chr1	191711462	23.36	19.82	28.21	19.64	8.04	7.08	6.14	9.71	5.98	8.7	18.75	12	5.1	6.72	13.27	7.48	TSS	AK003853	Smyd2		Mus musculus 18-day embryo whole body cDNA, RIKEN full-length enriched library, clone:1110020E07 product:hypothetical SET-domain of transcriptional regulators (TRX, EZ, ASH1 etc) containing protein, full insert sequence.
chr1	191740661	13.08	14.41	12.82	12.5	4.46	5.31	3.51	5.83	5.13	3.48	11.11	5	5.1	6.72	10.62	1.87	Gene body	NM_026796	Smyd2	NM_026796	SET and MYND domain containing 2
chr1	192002591	14.95	13.51	11.11	16.07	2.68	6.19	4.39	5.83	5.98	9.57	3.47	5	3.06	5.88	3.54	5.61	Intergenic
chr1	192827664	14.02	17.12	17.95	17.86	9.82	7.96	8.77	9.71	8.55	7.83	12.5	14	10.2	16.81	9.73	14.02	3End	BC024751	9630055N22Rik		Hypothetical protein.
chr1	193079995	27.1	12.61	24.79	22.32	0	0	3.51	0	1.71	6.96	21.53	0	0	2.52	0	0.93	Intergenic
chr1	193081091	25.23	19.82	24.79	19.64	10.71	6.19	9.65	7.77	5.98	9.57	15.28	12	5.1	7.56	7.96	3.74	Intergenic
chr1	193220410	0	0.9	0	0	6.25	21.24	16.67	9.71	22.22	24.35	11.81	6	12.24	3.36	11.5	19.63	TSS	NM_144880	Ppp2r5a	NM_144880	protein phosphatase 2, regulatory subunit B
chr1	193221939	20.56	19.82	17.09	16.07	8.93	8.85	8.77	6.8	10.26	6.96	4.86	13	5.1	5.04	12.39	2.8	TSS	NM_144880	Ppp2r5a	NM_144880	protein phosphatase 2, regulatory subunit B
chr1	193304247	42.06	50.45	51.28	47.32	24.11	23.89	28.95	18.45	24.79	48.7	47.92	18	17.35	36.97	24.78	23.36	Intergenic
chr1	193492228	15.89	13.51	17.95	16.07	11.61	11.5	6.14	4.85	7.69	20.87	6.25	4	5.1	3.36	3.54	3.74	Intergenic
chr1	194240255	27.1	25.23	35.04	32.14	14.29	11.5	10.53	12.62	12.82	11.3	20.83	17	17.35	12.61	15.93	14.02	Gene body	NM_001038607	Kcnh1	NM_001038607	potassium voltage-gated channel, subfamily H,
chr1	194956331	1.87	2.7	0.85	0.89	14.29	13.27	10.53	13.59	5.98	11.3	2.78	2	11.22	0.84	1.77	10.28	TSS	NM_145415	AA408296	NM_145415	digestive-organ expansion factor homolog
chr1	195100720	28.97	21.62	28.21	29.46	8.04	9.73	4.39	7.77	5.98	9.57	9.03	12	6.12	4.2	17.7	5.61	TSS	NM_008059	G0s2	NM_008059	G0/G1 switch gene 2
chr1	195153229	81.31	58.56	72.65	63.39	23.21	29.2	20.18	19.42	28.21	19.13	27.08	31	25.51	24.37	59.29	20.56	Gene body	NM_008484	Lamb3	NM_008484	laminin, beta 3
chr1	196381358	13.08	25.23	13.68	25	2.68	3.54	2.63	1.94	0.85	1.74	1.39	0	1.02	0.84	1.77	2.8	Intergenic
chr10	3077537	12.15	10.81	23.08	11.61	0	1.77	0.88	0.97	1.71	9.57	10.42	5	1.02	5.88	6.19	1.87	Intergenic
chr10	3134438	0.93	0	0	0	14.29	4.42	16.67	10.68	11.11	26.09	3.47	8	6.12	8.4	1.77	57.01	TSS	NM_172546	Cnksr3	NM_172546	Cnksr family member 3
chr10	3282084	11.21	14.41	11.11	13.39	3.57	4.42	4.39	4.85	6.84	4.35	6.94	10	0	10.92	11.5	6.54	Intergenic
chr10	4796360	33.64	36.04	36.75	41.07	66.07	55.75	56.14	65.05	58.12	66.09	50.69	33	74.49	39.5	36.28	83.18	TSS	NM_153399	Syne1	NM_153399	synaptic nuclear envelope 1 isoform 1
chr10	5913750	22.43	24.32	18.8	19.64	44.64	38.94	49.12	33.01	48.72	24.35	49.31	24	53.06	24.37	15.04	36.45	TSS	BC099894	1700052N19Rik		RIKEN cDNA 1700052N19 gene.
chr10	7079037	3.74	6.31	6.84	11.61	0	0	0	0	0	11.3	8.33	12	5.1	13.45	17.7	10.28	TSS	AK014573	AK014573		Mus musculus 0 day neonate skin cDNA, RIKEN full-length enriched library, clone:4632413I24 product:weakly similar to HISTOCOMPATIBILITY ANTIGEN 60 (FRAGMENT) [Mus musculus], full insert sequence.
chr10	7226654	8.41	9.91	1.71	18.75	0	0	0	0	0	20.87	19.44	15	6.12	10.92	17.7	6.54	TSS	AK136660	9230019H11Rik		Adult male epididymis cDNA, RIKEN full-length enriched library, clone:9230019H11 product:hypothetical protein, full insert sequence.
chr10	7318535	18.69	27.03	17.95	21.43	5.36	6.19	7.89	10.68	5.98	2.61	5.56	4	7.14	10.92	10.62	15.89	Gene body	NM_172784	Lrp11	NM_172784	low density lipoprotein receptor-related protein
chr10	7401620	1.87	3.6	2.56	2.68	49.11	24.78	48.25	52.43	24.79	54.78	37.5	48	34.69	33.61	37.17	41.12	TSS	AK038612	Lats1		Mus musculus large tumor suppressor 1 (Lats1) mRNA, partial cds.
chr10	7446194	66.36	64.86	65.81	77.68	105.36	95.58	120.18	98.06	108.55	74.78	77.78	116	72.45	82.35	69.03	85.05	TSS	NM_011835	Katna1	NM_011835	katanin p60 (ATPase-containing) subunit A1
chr10	8378341	23.36	30.63	30.77	24.11	15.18	13.27	9.65	14.56	11.11	22.61	11.81	12	7.14	15.97	11.5	9.35	Intergenic
chr10	8538153	27.1	26.13	38.46	25	5.36	2.65	10.53	4.85	10.26	10.43	26.39	7	10.2	5.04	7.08	3.74	Gene body	AK049453	SASH1		Mus musculus mRNA for putative adapter and scaffold protein (SASH1 gene).
chr10	8538275	22.43	17.12	23.08	14.29	0.89	0	1.75	1.94	1.71	17.39	13.89	0	0	3.36	1.77	1.87	Gene body	AK049453	SASH1		Mus musculus mRNA for putative adapter and scaffold protein (SASH1 gene).
chr10	8670384	14.95	9.01	14.53	10.71	1.79	2.65	3.51	2.91	3.42	6.09	5.56	2	4.08	7.56	7.96	2.8	Intergenic
chr10	8703215	12.15	9.01	10.26	8.04	0.89	0.88	0.88	3.88	0.85	2.61	6.94	1	2.04	2.52	0.88	0.93	Intergenic
chr10	10693594	12.15	15.32	15.38	8.93	3.57	2.65	1.75	1.94	0.85	3.48	3.47	4	6.12	6.72	5.31	0	Gene body	BC079566	Grm1		Metabotropic glutamate receptor 1 precursor (mGluR1).
chr10	10869280	23.36	16.22	18.8	16.96	12.5	7.96	5.26	4.85	8.55	13.04	11.11	4	7.14	5.88	6.19	8.41	TSS	NM_001077707	Shprh	NM_001077707	SNF2 histone linker PHD RING helicase isoform a
chr10	11063265	19.63	27.93	23.93	31.25	5.36	8.85	6.14	7.77	11.11	6.96	15.28	16	10.2	15.13	29.2	6.54	TSS	NM_010146	Epm2a	NM_010146	laforin
chr10	13044191	43.93	43.24	35.9	34.82	16.07	21.24	19.3	14.56	23.08	23.48	13.89	18	16.33	21.01	38.94	12.15	TSS	BC130264	Phactr2	NM_001033257	phosphatase and actin regulator 2
chr10	13044280	8.41	10.81	9.4	12.5	16.96	12.39	27.19	34.95	28.21	21.74	21.53	24	29.59	18.49	22.12	28.97	TSS	BC130264	Phactr2	NM_001033257	phosphatase and actin regulator 2
chr10	13775686	50.47	52.25	49.57	46.43	72.32	71.68	61.4	71.84	69.23	60.87	60.42	53	51.02	45.38	54.87	65.42	Gene body	AK143444	Hivep2	NM_010437	human immunodeficiency virus type I enhancer
chr10	15768371	18.69	18.02	26.5	21.43	8.04	7.96	8.77	7.77	5.98	20	17.36	13	17.35	7.56	21.24	16.82	Intergenic
chr10	18463608	3.74	8.11	3.42	5.36	11.61	8.85	11.4	6.8	17.09	6.96	2.08	2	2.04	0.84	1.77	2.8	TSS	AK147963	mKIAA1244		Mus musculus 16 days neonate cerebellum cDNA, RIKEN full-length enriched library, clone:9630004D11 product:BIG3 homolog [Homo sapiens], full insert sequence.
chr10	18565061	52.34	54.05	57.26	47.32	66.07	76.99	98.25	47.57	89.74	69.57	78.47	80	88.78	85.71	79.65	85.05	TSS	NM_022032	Perp	NM_022032	PERP, TP53 apoptosis effector
chr10	19628403	12.15	10.81	11.11	17.86	3.57	2.65	3.51	4.85	1.71	3.48	5.56	3	3.06	8.4	11.5	1.87	TSS	NM_008822	Pex7	NM_008822	peroxisome biogenesis factor 7
chr10	19654657	6.54	14.41	5.98	5.36	16.96	16.81	19.3	14.56	19.66	13.91	6.94	7	10.2	5.88	7.96	7.48	TSS	NM_008580	Map3k5	NM_008580	mitogen activated protein kinase kinase kinase
chr10	19869038	5.61	4.5	4.27	4.46	11.61	8.85	16.67	3.88	6.84	5.22	6.25	13	9.18	13.45	10.62	14.95	TSS	NM_008635	Mtap7	NM_008635	microtubule-associated protein 7
chr10	19893831	19.63	11.71	14.53	17.86	5.36	2.65	3.51	2.91	9.4	19.13	19.44	5	3.06	2.52	6.19	4.67	3End	AK138667	AK138667		Mus musculus adult male spinal cord cDNA, RIKEN full-length enriched library, clone:A330048D23 product:unclassifiable, full insert sequence.
chr10	19963323	20.56	16.22	24.79	19.64	0.89	5.31	3.51	1.94	2.56	5.22	11.81	3	4.08	1.68	1.77	2.8	Gene body	AK008018	Mtap7		Mus musculus mRNA for microtubule associate protein, complete cds.
chr10	20206831	65.42	57.66	63.25	63.39	60.71	47.79	21.05	34.95	29.91	55.65	45.83	31	19.39	28.57	23.01	25.23	Gene body	AK020137	Pde7b		Mus musculus cAMP-specific phosphodiesterase PDE7B (Pde7b) mRNA, complete cds.
chr10	21869842	20.56	63.06	49.57	61.61	69.64	67.26	62.28	42.72	61.54	60.87	38.89	17	23.47	21.01	27.43	29.91	TSS	AK053193	AK053193		Mus musculus 9.5 days embryo parthenogenote cDNA, RIKEN full-length enriched library, clone:B130052F21 product:similar to CYCLIN-DEPENDENT KINASE 6 (FRAGMENT) [Rattus norvegicus], full insert sequence.
chr10	21932425	32.71	1.8	0	0	1.79	0	0	0	0	0	0.69	31	43.88	34.45	30.09	26.17	Intergenic
chr10	21994414	10.28	0	1.71	0	1.79	0	0	0	0	0	0	10	8.16	8.4	11.5	7.48	TSS	AK145180	AK145180		Mus musculus mammary gland RCB-0527 Jyg-MC(B) cDNA, RIKEN full-length enriched library, clone:G930012P08 product:similar to Histocompatibility antigen 60 (Fragment) [Mus musculus], full insert sequence.
chr10	22571834	14.95	18.92	17.09	17.86	32.14	25.66	41.23	23.3	36.75	30.43	15.28	31	35.71	34.45	36.28	37.38	Intergenic
chr10	23391189	6.54	12.61	16.24	14.29	0	0	1.75	0	0	3.48	2.08	1	0	1.68	0.88	0	Intergenic
chr10	23531861	1.87	0.9	0	0.89	14.29	23.89	14.91	23.3	12.82	15.65	18.06	13	14.29	19.33	10.62	11.21	TSS	BC068251	BC068251		Mus musculus 18-day embryo whole body cDNA, RIKEN full-length enriched library, clone:1110021L09 product:hypothetical (Pro)aerolysin, pore-forming lobe structure containing protein, full insert sequence.
chr10	23943006	61.68	60.36	60.68	66.07	26.79	35.4	21.93	25.24	27.35	26.96	28.47	37	30.61	55.46	77.88	21.5	TSS	NM_021509	Moxd1	NM_021509	monooxygenase, DBH-like 1
chr10	24627197	33.64	29.73	25.64	30.36	36.61	51.33	38.6	41.75	30.77	38.26	33.33	53	48.98	52.94	46.9	58.88	3End	AF507918	Med23	NM_027347	mediator complex subunit 23
chr10	26747885	11.21	7.21	7.69	10.71	1.79	1.77	0.88	1.94	0.85	1.74	3.47	3	2.04	13.45	1.77	1.87	Gene body	NM_008481	Lama2	NM_008481	laminin, alpha 2
chr10	27796052	29.91	34.23	35.04	37.5	27.68	27.43	25.44	20.39	32.48	28.7	25.69	21	17.35	15.13	17.7	20.56	TSS	NM_008983	Ptprk	NM_008983	protein tyrosine phosphatase, receptor type, K
chr10	28065407	36.45	23.42	21.37	28.57	2.68	0.88	0.88	2.91	2.56	5.22	11.81	4	1.02	1.68	7.08	2.8	Intergenic
chr10	31064554	22.43	27.03	23.93	24.11	9.82	12.39	16.67	12.62	13.68	13.04	21.53	14	15.31	17.65	15.04	14.95	TSS	AK189057	mD53		Mus musculus tumor protein D53 (mD53) mRNA, complete cds.
chr10	31328537	61.68	85.59	74.36	84.82	26.79	41.59	28.07	22.33	33.33	19.13	27.78	40	33.67	46.22	62.83	41.12	Intergenic
chr10	31772835	13.08	10.81	11.11	8.04	6.25	6.19	4.39	1.94	4.27	3.48	11.11	4	2.04	2.52	3.54	2.8	Gene body	NM_001025286	Tcba1	NM_001025286	T-cell lymphoma breakpoint associated target 1
chr10	32610278	81.31	97.3	76.92	68.75	41.07	46.02	34.21	33.98	42.74	37.39	45.83	42	54.08	42.86	53.1	31.78	TSS	NM_001025286	Tcba1	NM_001025286	T-cell lymphoma breakpoint associated target 1
chr10	34017268	66.36	73.87	62.39	60.71	99.11	113.27	133.33	135.92	131.62	113.91	99.31	102	135.71	73.11	78.76	87.85	TSS	NM_030203	Tspyl4	NM_030203	TSPY-like 4
chr10	36227825	21.5	13.51	19.66	16.07	8.93	15.04	0	4.85	14.53	2.61	2.78	3	3.06	3.36	6.19	6.54	TSS	AK031910	Hs3st5	NM_001081208	heparan sulfate (glucosamine)
chr10	39089718	0	0	0.85	1.79	22.32	6.19	28.07	19.42	20.51	16.52	4.17	5	4.08	3.36	0	22.43	TSS	AK156584	Fyn		Activated spleen cDNA, RIKEN full-length enriched library, clone:F830031K10 product:Fyn proto-oncogene, full insert sequence.
chr10	39222099	28.04	26.13	29.91	28.57	8.04	7.96	9.65	8.74	12.82	13.04	15.97	13	12.24	26.05	23.89	6.54	Gene body	AK156584	Fyn		Activated spleen cDNA, RIKEN full-length enriched library, clone:F830031K10 product:Fyn proto-oncogene, full insert sequence.
chr10	39336627	14.95	13.51	19.66	14.29	3.57	0.88	6.14	9.71	5.13	13.91	20.83	7	5.1	6.72	7.08	4.67	Gene body	NM_134000	Traf3ip2	NM_134000	Traf3 interacting protein 2
chr10	40236360	36.45	37.84	35.04	40.18	56.25	61.06	51.75	56.31	58.12	33.91	25	42	16.33	42.02	43.36	25.23	Intergenic
chr10	40471178	15.89	12.61	16.24	11.61	2.68	5.31	6.14	3.88	5.13	6.96	11.81	10	4.08	11.76	9.73	11.21	Gene body	NM_177793	9030224M15Rik	NM_177793	hypothetical protein LOC327747
chr10	40968966	10.28	9.01	7.69	14.29	0.89	1.77	2.63	2.91	1.71	6.96	6.94	6	8.16	3.36	3.54	1.87	Gene body	NM_133999	Fig4	NM_133999	Sac domain-containing inositol phosphatase 3
chr10	41171324	31.78	31.53	26.5	25.89	3.57	5.31	3.51	12.62	15.38	35.65	36.11	9	5.1	10.08	10.62	9.35	TSS	NM_153398	Zbtb24	NM_153398	zinc finger and BTB domain containing 24
chr10	41196549	51.4	54.95	62.39	60.71	40.18	40.71	34.21	32.04	32.48	26.96	26.39	30	26.53	34.45	35.4	34.58	TSS	AK159369	Mical1	NM_138315	microtubule associated monoxygenase, calponin
chr10	41235225	14.02	13.51	11.97	14.29	12.5	17.7	34.21	30.1	12.82	19.13	25	24	22.45	23.53	22.12	26.17	3End	AK013818	AK013818		Mus musculus adult male hippocampus cDNA, RIKEN full-length enriched library, clone:2900084F20 product:hypothetical Cyclophilin-type peptidyl-prolyl cis-trans isomerase containing protein, full insert sequence.
chr10	41308184	15.89	15.32	17.09	14.29	4.46	3.54	3.51	6.8	5.13	6.09	4.86	15	2.04	3.36	13.27	8.41	TSS	BC112401	5033413D22Rik		5033413D22Rik protein.
chr10	41347346	27.1	33.33	35.04	32.14	12.5	15.04	11.4	14.56	15.38	11.3	13.19	12	7.14	12.61	21.24	8.41	Intergenic
chr10	41530079	57.94	53.15	44.44	54.46	27.68	24.78	20.18	27.18	26.5	18.26	47.92	35	17.35	29.41	53.98	30.84	TSS	BC100403	Sesn1		Sesn1 protein.
chr10	41927648	10.28	5.41	9.4	7.14	0	0	0	0.97	0	2.61	2.08	0	0	2.52	1.77	0	Gene body	BC019532	Foxo3a	NM_019740	forkhead box O3a
chr10	41927714	8.41	5.41	6.84	11.61	1.79	0.88	1.75	2.91	3.42	4.35	8.33	0	1.02	0.84	0.88	1.87	Gene body	BC019532	Foxo3a	NM_019740	forkhead box O3a
chr10	41950631	20.56	17.12	29.91	26.79	0	0.88	4.39	4.85	6.84	6.96	19.44	1	3.06	2.52	3.54	3.74	Intergenic
chr10	42222360	0	0	0	0	8.04	7.08	5.26	8.74	8.55	5.22	0.69	0	2.04	2.52	0	5.61	TSS	NM_017472	Snx3	NM_017472	sorting nexin 3
chr10	42614721	14.02	15.32	12.82	17.86	16.07	12.39	7.02	4.85	8.55	12.17	11.11	3	4.08	4.2	7.08	4.67	Intergenic
chr10	42941823	48.6	50.45	50.43	53.57	30.36	33.63	30.7	27.18	27.35	25.22	28.47	23	23.47	35.29	44.25	29.91	TSS	NM_027772	Pdss2	NM_027772	prenyl diphosphate synthase, subunit 2
chr10	43427866	18.69	18.92	26.5	17.86	6.25	8.85	7.02	8.74	6.84	6.96	13.89	10	7.14	15.97	10.62	12.15	Intergenic
chr10	43647465	48.6	58.56	58.12	46.43	8.93	12.39	24.56	17.48	26.5	51.3	59.03	18	16.33	24.37	15.04	22.43	Gene body	NM_130892	Rtn4ip1	NM_130892	reticulon 4 interacting protein 1
chr10	44145059	13.08	14.41	21.37	18.75	5.36	4.42	5.26	6.8	4.27	13.04	13.89	4	6.12	5.88	3.54	3.74	Intergenic
chr10	44147326	39.25	29.73	34.19	50	8.93	7.08	14.91	7.77	14.53	13.91	14.58	6	10.2	18.49	24.78	3.74	Intergenic
chr10	44469224	33.64	38.74	38.46	29.46	17.86	20.35	14.04	19.42	16.24	14.78	22.92	29	19.39	15.97	27.43	13.08	Intergenic
chr10	44824008	26.17	24.32	30.77	22.32	4.46	6.19	6.14	10.68	7.69	8.7	15.97	10	5.1	10.08	13.27	2.8	Gene body	NM_011156	Prep	NM_011156	prolyl endopeptidase
chr10	44864040	24.3	16.22	28.21	25.89	0.89	7.08	9.65	5.83	4.27	16.52	14.58	5	4.08	8.4	6.19	6.54	Gene body	NM_011156	Prep	NM_011156	prolyl endopeptidase
chr10	50873424	23.36	19.82	23.08	19.64	7.14	10.62	8.77	5.83	8.55	10.43	9.03	4	14.29	10.92	22.12	4.67	Intergenic
chr10	52101623	63.55	61.26	76.07	73.21	35.71	43.36	41.23	37.86	47.01	30.43	50.69	51	27.55	64.71	75.22	58.88	TSS	AK032613	Gopc	NM_053187	golgi associated PDZ and coiled-coil motif
chr10	53037802	15.89	14.41	19.66	21.43	0.89	0.88	1.75	0.97	3.42	3.48	12.5	1	0	10.92	5.31	1.87	Intergenic
chr10	53126710	16.82	7.21	7.69	9.82	0.89	0	0.88	0.97	1.71	2.61	6.94	2	2.04	0.84	0.88	0	Intergenic
chr10	53762327	25.23	18.92	29.06	18.75	4.46	7.08	5.26	5.83	10.26	7.83	15.97	9	9.18	9.24	15.04	6.54	Gene body	AK172376	Man1a	NM_008548	mannosidase, alpha, class 1A, member 1
chr10	58163388	9.35	12.61	11.11	16.07	2.68	3.54	1.75	2.91	4.27	5.22	5.56	2	8.16	8.4	3.54	3.74	Gene body	AK133046	AK133046		Mus musculus adult male testis cDNA, RIKEN full-length enriched library, clone:4930560K07 product:hypothetical protein, full insert sequence.
chr10	58882538	15.89	14.41	16.24	12.5	4.46	2.65	5.26	5.83	2.56	6.96	13.89	6	6.12	6.72	7.96	6.54	Gene body	NM_023530	Pla2g12b	NM_023530	phospholipase A2, group XIIB
chr10	58928751	34.58	22.52	36.75	29.46	4.46	3.54	7.02	3.88	6.84	9.57	16.67	5	3.06	5.04	7.96	3.74	Intergenic
chr10	59165132	5.61	4.5	3.42	4.46	19.64	9.73	14.91	18.45	11.97	9.57	16.67	16	14.29	10.08	7.96	43.93	TSS	AK083520	Cbara1	NM_144822	calcium binding atopy-related autoantigen 1
chr10	59413648	0.93	2.7	0.85	1.79	22.32	16.81	13.16	10.68	11.11	4.35	0	16	4.08	5.88	3.54	5.61	TSS	NM_029083	Ddit4	NM_029083	DNA-damage-inducible transcript 4
chr10	59453916	36.45	28.83	22.22	19.64	4.46	3.54	6.14	2.91	3.42	9.57	11.81	5	0	4.2	4.42	3.74	Gene body	NM_025514	D10Ertd641e	NM_025514	hypothetical protein LOC52717
chr10	59729636	26.17	27.03	23.08	21.43	5.36	18.58	11.4	26.21	11.11	26.09	28.47	15	12.24	15.97	11.5	14.95	Intergenic
chr10	59804461	22.43	19.82	23.93	19.64	15.18	16.81	8.77	15.53	11.11	24.35	15.28	12	11.22	8.4	8.85	7.48	Intergenic
chr10	59809951	80.37	90.09	106.84	92.86	52.68	52.21	43.86	45.63	49.57	41.74	59.72	55	42.86	54.62	95.58	59.81	TSS	AK131118	4632428N05Rik	NM_028732	Gi24 receptor precursor
chr10	60283374	14.95	14.41	23.08	20.54	2.68	5.31	3.51	3.88	5.13	6.09	13.19	4	3.06	4.2	7.08	2.8	TSS	AK147603	Unc5b	NM_029770	unc-5 homolog B
chr10	60552385	34.58	37.84	41.88	42.86	23.21	23.89	27.19	25.24	21.37	13.04	25	24	19.39	31.93	38.05	36.45	TSS	NM_025273	Pcbd1	NM_025273	pterin 4 alpha carbinolamine
chr10	60696051	25.23	30.63	31.62	28.57	12.5	17.7	16.67	17.48	10.26	15.65	28.47	14	20.41	16.81	16.81	16.82	Gene body	NM_001081127	Adamts14	NM_001081127	a disintegrin-like and metallopeptidase
chr10	60949852	42.06	39.64	34.19	39.29	66.07	74.34	68.42	99.03	67.52	50.43	60.42	85	57.14	52.94	75.22	54.21	Intergenic
chr10	61088340	1.87	3.6	1.71	2.68	16.07	7.08	14.04	16.5	13.68	22.61	15.28	19	16.33	3.36	1.77	27.1	3End	AY255578	AY255578		Mus musculus neuropeptide FF receptor 1 mRNA, partial cds.
chr10	61159949	81.31	54.05	69.23	70.54	29.46	33.63	34.21	27.18	23.93	15.65	40.28	49	31.63	17.65	60.18	19.63	TSS	BC119320	Tysnd1		Adult male liver cDNA, RIKEN full-length enriched library, clone:1300019N10 product:hypothetical protein, full insert sequence (Tysnd1 protein) (NOD-derived CD11c +ve dendritic cells cDNA, RIKEN full-length enriched library, clone:F630041N23 product:hypot
chr10	61693603	27.1	26.13	22.22	20.54	56.25	48.67	66.67	66.99	46.15	49.57	53.47	64	70.41	28.57	27.43	94.39	TSS	BC003872	Tspan15		Mus musculus 11 days embryo whole body cDNA, RIKEN full-length enriched library, clone:2700063A19 product:TETRASPAN NET-7 homolog [Homo sapiens], full insert sequence.
chr10	61776910	19.63	20.72	23.93	17.86	6.25	7.96	8.77	4.85	9.4	6.96	8.33	9	9.18	13.45	22.12	7.48	Gene body	AK165237	Hk1		Mus musculus 6 days neonate spleen cDNA, RIKEN full-length enriched library, clone:F430004D04 product:hexokinase 1, full insert sequence.
chr10	62428931	38.32	49.55	44.44	36.61	10.71	7.08	12.28	12.62	10.26	48.7	53.47	17	3.06	18.49	9.73	9.35	3End	BC030382	Dna2l	NM_177372	DNA2 DNA replication helicase 2-like
chr10	62443327	0.93	0	0	0	17.86	5.31	7.89	16.5	5.98	13.91	5.56	7	14.29	1.68	0	15.89	TSS	NM_027425	Rufy2	NM_027425	RUN and FYVE domain-containing 2
chr10	62527556	39.25	25.23	34.19	24.11	5.36	8.85	4.39	12.62	7.69	13.04	24.31	9	4.08	5.88	6.19	5.61	3End	BC028493	Pbld		Mus musculus adult male kidney cDNA, RIKEN full-length enriched library, clone:0610038K03 product:similar to MAWD BINDING PROTEIN (UNKNOWN PROTEIN 32 FROM 2D-PAGE OF LIVER TISSUE) [Homo sapiens], full insert sequence.
chr10	62527558	32.71	23.42	19.66	25	1.79	3.54	5.26	4.85	2.56	17.39	24.31	10	7.14	4.2	0.88	6.54	3End	BC028493	Pbld		Mus musculus adult male kidney cDNA, RIKEN full-length enriched library, clone:0610038K03 product:similar to MAWD BINDING PROTEIN (UNKNOWN PROTEIN 32 FROM 2D-PAGE OF LIVER TISSUE) [Homo sapiens], full insert sequence.
chr10	63811929	11.21	16.22	21.37	16.96	5.36	3.54	3.51	11.65	12.82	7.83	8.33	5	5.1	2.52	3.54	2.8	Intergenic
chr10	67584178	7.48	9.91	9.4	9.82	0.89	1.77	1.75	0	0.85	11.3	3.47	0	1.02	1.68	0.88	0.93	Gene body	AK162717	Arid5b		6 days neonate skin cDNA, RIKEN full-length enriched library, clone:A030003K01 product:AT rich interactive domain 5B (Mrf1 like), full insert sequence.
chr10	67731624	3.74	2.7	1.71	1.79	14.29	8.85	3.51	19.42	5.13	8.7	15.28	18	14.29	8.4	12.39	11.21	Gene body	AK031596	Arid5b		AT-rich interactive domain-containing protein 5B (ARID domain- containing protein 5B) (MRF1-like) (Modulator recognition factor protein 2) (MRF-2) (Developmentally and sexually retarded with transient immune abnormalities protein).
chr10	67993932	32.71	21.62	20.51	20.54	0.89	0.88	2.63	6.8	2.56	17.39	31.94	4	1.02	5.04	2.65	3.74	Gene body	NM_028491	1700040L02Rik	NM_028491	hypothetical protein LOC73287
chr10	68617602	60.75	53.15	55.56	46.43	4.46	4.42	3.51	8.74	6.84	30.43	53.47	11	3.06	10.08	5.31	6.54	Intergenic
chr10	69389652	80.37	85.59	79.49	80.36	46.43	54.87	43.86	47.57	49.57	29.57	40.97	65	34.69	31.93	76.11	28.97	TSS	NM_170687	Ank3	NM_170687	ankyrin 3, epithelial isoform f
chr10	69502754	17.76	12.61	13.68	12.5	2.68	4.42	6.14	4.85	5.13	4.35	7.64	4	3.06	13.45	14.16	6.54	Intergenic
chr10	69614172	14.95	14.41	11.11	8.04	3.57	2.65	2.63	4.85	4.27	8.7	5.56	1	2.04	2.52	3.54	0.93	Intergenic
chr10	70590240	3.74	2.7	5.13	2.68	10.71	8.85	3.51	8.74	11.11	4.35	15.97	16	12.24	15.13	18.58	17.76	Gene body	AK089066	Bicc1		Protein bicaudal C homolog 1 (Bic-C).
chr10	70715190	17.76	9.01	16.24	8.93	0.89	1.77	2.63	0.97	0.85	3.48	3.47	4	2.04	4.2	2.65	0.93	3End	NM_145420	Ube2d1	NM_145420	ubiquitin-conjugating enzyme E2D 1, UBC4/5
chr10	72117623	32.71	27.03	29.91	34.82	11.61	12.39	12.28	13.59	15.38	12.17	15.97	7	7.14	13.45	24.78	10.28	TSS	AK008144	Zwint	NM_025635	ZW10 interacting protein-1
chr10	74514601	16.82	12.61	11.97	17.86	8.93	5.31	3.51	5.83	9.4	12.17	13.89	5	5.1	6.72	5.31	3.74	Gene body	AK142025	Rab36	NM_029781	RAB36, member RAS oncogene family
chr10	74515427	29.91	21.62	27.35	27.68	14.29	12.39	18.42	20.39	19.66	23.48	33.33	11	15.31	11.76	15.04	12.15	Gene body	AK142025	Rab36	NM_029781	RAB36, member RAS oncogene family
chr10	75172227	10.28	12.61	20.51	8.93	0	3.54	1.75	2.91	2.56	24.35	9.72	1	1.02	1.68	0.88	0	Intergenic
chr10	75172256	14.02	13.51	11.11	12.5	4.46	3.54	2.63	4.85	3.42	12.17	6.25	5	1.02	3.36	3.54	3.74	Intergenic
chr10	75253848	43.93	41.44	41.03	49.11	25	19.47	21.93	27.18	18.8	18.26	45.14	39	26.53	25.21	24.78	30.84	Gene body	NM_008185	Gstt1	NM_008185	glutathione S-transferase, theta 1
chr10	75261196	83.18	79.28	87.18	83.93	115.18	132.74	119.3	143.69	117.09	121.74	112.5	146	97.96	85.71	109.73	127.1	TSS	NM_008185	Gstt1	NM_008185	glutathione S-transferase, theta 1
chr10	75395092	6.54	5.41	3.42	3.57	50.89	21.24	37.72	56.31	25.64	29.57	35.42	50	39.8	4.2	5.31	66.36	TSS	NM_008606	Mmp11	NM_008606	matrix metallopeptidase 11
chr10	75822735	16.82	17.12	25.64	16.07	3.57	7.96	4.39	4.85	5.98	4.35	6.25	7	6.12	5.88	15.93	5.61	Gene body	AB207233	Pcnt	NM_008787	pericentrin
chr10	76000443	32.71	38.74	49.57	37.5	16.07	12.39	6.14	31.07	5.13	15.65	36.81	18	13.27	18.49	16.81	14.02	Gene body	NM_146006	Lss	NM_146006	lanosterol synthase
chr10	76040912	14.02	14.41	12.82	11.61	6.25	6.19	5.26	5.83	6.84	6.96	4.86	4	1.02	7.56	7.08	0.93	Gene body	NM_080845	Ftcd	NM_080845	formiminotransferase cyclodeaminase
chr10	76471194	13.08	15.32	14.53	16.07	6.25	4.42	7.02	5.83	7.69	6.96	7.64	10	2.04	7.56	11.5	2.8	Intergenic
chr10	76495225	73.83	82.88	69.23	81.25	119.64	113.27	133.33	104.85	125.64	82.61	103.47	111	110.2	80.67	84.96	105.61	TSS	L36539	Slc19a1	NM_031196	solute carrier family 19 (sodium/hydrogen
chr10	76520136	5.61	5.41	6.84	5.36	14.29	14.16	12.28	13.59	13.68	10.43	13.19	13	9.18	12.61	12.39	5.61	Gene body	NM_009929	Col18a1	NM_009929	procollagen, type XVIII, alpha 1
chr10	76592919	11.21	9.01	8.55	10.71	1.79	1.77	1.75	4.85	3.42	3.48	4.17	2	2.04	3.36	3.54	1.87	Intergenic
chr10	76609848	15.89	17.12	17.09	25	6.25	5.31	3.51	5.83	5.98	5.22	10.42	4	2.04	5.88	15.04	8.41	Gene body	NM_009929	Col18a1	NM_009929	procollagen, type XVIII, alpha 1
chr10	76868892	53.27	41.44	41.88	35.71	8.93	11.5	12.28	11.65	12.82	28.7	48.61	7	7.14	18.49	7.96	14.02	Gene body	NM_001024838	Adarb1	NM_001024838	adenosine deaminase, RNA-specific, B1 isoform 3
chr10	76881001	0.93	0.9	0.85	0	6.25	5.31	16.67	6.8	5.98	6.09	4.86	3	4.08	7.56	0	21.5	TSS	NM_001024838	Adarb1	NM_001024838	adenosine deaminase, RNA-specific, B1 isoform 3
chr10	76912272	5.61	9.91	6.84	8.04	25.89	30.09	32.46	29.13	19.66	35.65	28.47	38	40.82	25.21	35.4	37.38	Intergenic
chr10	76985580	33.64	30.63	31.62	35.71	75.89	78.76	121.05	74.76	81.2	68.7	51.39	67	85.71	41.18	47.79	57.94	Intergenic
chr10	77301847	47.66	55.86	50.43	46.43	31.25	26.55	28.95	34.95	35.04	36.52	52.78	50	53.06	48.74	46.9	46.73	3End	NM_001024709	EG544710	NM_001024709	hypothetical protein LOC544710
chr10	77379221	0	0	0.85	0.89	2.68	8.85	2.63	8.74	5.98	8.7	7.64	13	8.16	5.04	8.85	8.41	Gene body	AK134735	Trpm2	NM_138301	transient receptor potential cation channel,
chr10	77754466	7.48	10.81	9.4	8.04	0.89	5.31	1.75	3.88	0.85	2.61	4.17	1	2.04	1.68	2.65	0.93	Gene body	AK015906	Agpat3	NM_053014	1-acylglycerol-3-phosphate O-acyltransferase 3
chr10	78402994	27.1	28.83	30.77	23.21	9.82	9.73	6.14	11.65	8.55	13.91	22.22	9	18.37	5.88	15.04	17.76	Intergenic
chr10	79057952	90.65	69.37	70.94	78.57	25.89	47.79	24.56	25.24	43.59	32.17	49.31	31	33.67	39.5	45.13	36.45	Intergenic
chr10	79175253	50.47	38.74	47.86	46.43	18.75	25.66	28.07	19.42	20.51	13.91	29.17	25	16.33	21.85	38.94	13.08	3End	NM_001077184	Bsg	NM_001077184	basigin isoform 2
chr10	79229235	35.51	48.65	37.61	41.96	99.11	68.14	90.35	102.91	86.32	80.87	63.19	88	85.71	53.78	38.94	84.11	TSS	NM_144528	Rnf126	NM_144528	ring finger protein 126
chr10	79266186	60.75	67.57	47.86	57.14	7.14	38.94	22.81	30.1	23.08	14.78	19.44	26	20.41	23.53	34.51	20.56	Gene body	BC015297	Palm	NM_023128	paralemmin
chr10	79266540	36.45	39.64	42.74	40.18	39.29	52.21	59.65	69.9	53.85	58.26	53.47	73	62.24	61.34	54.87	59.81	Gene body	BC015297	Palm	NM_023128	paralemmin
chr10	79317066	15.89	8.11	10.26	15.18	4.46	4.42	2.63	5.83	3.42	5.22	8.33	3	1.02	2.52	1.77	1.87	TSS	NM_008956	Ptbp1	NM_008956	polypyrimidine tract binding protein 1 isoform
chr10	79430318	7.48	6.31	11.11	6.25	0.89	0.88	0.88	0	0	13.04	4.86	0	0	1.68	0	0	Gene body	NM_175450	Wdr18	NM_175450	WD repeat domain 18
chr10	79444355	11.21	9.91	7.69	12.5	1.79	2.65	2.63	1.94	1.71	2.61	3.47	7	2.04	5.04	1.77	5.61	Gene body	NM_001003949	ORF61	NM_001003949	membralin
chr10	79551738	21.5	25.23	29.06	18.75	8.04	6.19	5.26	5.83	3.42	11.3	21.53	4	3.06	2.52	10.62	9.35	Gene body	BC019206	Sno		Mus musculus mRNA for putative strawberry notch protein (Sno gene).
chr10	79591328	40.19	33.33	35.9	27.68	4.46	7.08	0.88	8.74	3.42	34.78	25.69	7	2.04	4.2	3.54	3.74	3End	BC100552	Dos	NM_015761	downstream of Stk11
chr10	79591579	11.21	12.61	11.97	12.5	0.89	0	2.63	0.97	0.85	2.61	8.33	3	2.04	1.68	2.65	1.87	3End	BC100552	Dos	NM_015761	downstream of Stk11
chr10	79599281	13.08	16.22	11.11	12.5	44.64	26.55	42.11	33.98	29.06	35.65	26.39	45	37.76	5.04	18.58	31.78	TSS	BC100552	Dos	NM_015761	downstream of Stk11
chr10	79702619	28.04	22.52	35.04	25	1.79	6.19	4.39	7.77	2.56	13.04	12.5	6	3.06	6.72	7.96	5.61	Gene body	NM_023431	Mum1	NM_023431	UBE-1C2 protein
chr10	79761853	0.93	2.7	0.85	1.79	27.68	18.58	36.84	12.62	15.38	22.61	3.47	10	4.08	19.33	6.19	29.91	TSS	AK140637	Apc2		Mus musculus 10 days neonate cerebellum cDNA, RIKEN full-length enriched library, clone:B930065I19 product:unclassifiable, full insert sequence.
chr10	79775959	31.78	35.14	32.48	26.79	16.96	20.35	15.79	16.5	13.68	13.04	17.36	20	13.27	10.08	15.04	14.02	Intergenic
chr10	79778405	29.91	32.43	34.19	40.18	62.5	63.72	87.72	68.93	72.65	50.43	52.08	55	84.69	30.25	45.13	60.75	3End	NM_025521	2310011J03Rik	NM_025521	hypothetical protein LOC66374
chr10	79821020	91.59	112.61	94.02	99.11	206.25	171.68	194.74	198.06	141.03	160	160.42	191	140.82	73.95	126.55	263.55	TSS	BC099679	6330514A18Rik	NM_183152	hypothetical protein LOC216166
chr10	79900648	61.68	55.86	86.32	76.79	17.86	26.55	20.18	22.33	27.35	12.17	34.72	29	10.2	23.53	28.32	15.89	Intergenic
chr10	79909108	28.97	28.83	35.9	28.57	8.93	10.62	8.77	10.68	11.11	13.04	11.81	13	15.31	16.81	22.12	14.02	Intergenic
chr10	79938466	46.73	63.96	62.39	58.93	20.54	32.74	20.18	18.45	21.37	16.52	29.86	22	27.55	33.61	38.94	20.56	Intergenic
chr10	79952830	44.86	40.54	34.19	41.07	66.07	53.1	68.42	78.64	47.01	59.13	54.17	82	89.8	58.82	78.76	79.44	Intergenic
chr10	80002528	56.07	45.95	52.14	45.54	22.32	25.66	16.67	21.36	25.64	13.04	16.67	15	19.39	20.17	38.05	4.67	TSS	AK018877	Atp8b3		Adult male testis cDNA, RIKEN full-length enriched library, clone:1700065E01 product:hypothetical protein, full insert sequence (Atp8b3 protein) (Adult male testis cDNA, RIKEN full-length enriched library, clone:1700061G23 product:hypothetical protein, fu
chr10	80108371	11.21	10.81	12.82	8.93	3.57	2.65	3.51	2.91	1.71	6.09	6.94	2	3.06	3.36	5.31	0.93	TSS	BC040692	Btbd2		Hypothetical protein.
chr10	80119179	0.93	0.9	0	0.89	14.29	7.96	8.77	6.8	9.4	11.3	6.94	4	1.02	5.04	2.65	13.08	Intergenic
chr10	80142770	17.76	21.62	17.95	22.32	14.29	5.31	5.26	17.48	11.11	6.96	6.25	7	8.16	6.72	8.85	8.41	Intergenic
chr10	80297566	13.08	15.32	12.82	16.96	36.61	33.63	42.11	43.69	28.21	22.61	25	35	52.04	20.17	22.12	35.51	Gene body	NM_001013758	BC072620	NM_001013758	hypothetical protein LOC237403
chr10	80306800	2.8	2.7	3.42	3.57	20.54	9.73	12.28	14.56	13.68	23.48	5.56	6	10.2	0.84	1.77	4.67	TSS	NM_001013758	BC072620	NM_001013758	hypothetical protein LOC237403
chr10	80317893	1.87	2.7	2.56	3.57	16.07	7.96	14.04	16.5	14.53	15.65	6.94	7	14.29	2.52	7.08	9.35	TSS	NM_025349	Lsm7	NM_025349	LSM7 homolog, U6 small nuclear RNA associated
chr10	80376568	16.82	23.42	17.95	13.39	5.36	3.54	7.02	13.59	3.42	9.57	34.72	5	4.08	4.2	7.96	5.61	Gene body	NM_010722	Lmnb2	NM_010722	lamin B2
chr10	80376867	45.79	56.76	49.57	44.64	14.29	15.93	12.28	17.48	17.95	20.87	36.81	33	15.31	15.13	37.17	28.97	Gene body	NM_010722	Lmnb2	NM_010722	lamin B2
chr10	80391630	76.64	75.68	66.67	73.21	112.5	121.24	121.93	102.91	104.27	64.35	76.39	104	54.08	39.5	64.6	61.68	TSS	NM_008655	Gadd45b	NM_008655	growth arrest and DNA-damage-inducible 45 beta
chr10	80755316	68.22	61.26	64.1	86.61	27.68	37.17	30.7	24.27	32.48	10.43	40.28	38	9.18	25.21	45.13	24.3	TSS	NM_008844	Pip5k1c	NM_008844	phosphatidylinositol-4-phosphate 5-kinase, type
chr10	80841357	33.64	24.32	35.9	43.75	7.14	10.62	5.26	5.83	9.4	8.7	33.33	7	4.08	9.24	11.5	3.74	TSS	NM_019757	Fzr1	NM_019757	Fzr1 protein
chr10	80850754	13.08	10.81	11.11	9.82	3.57	5.31	4.39	2.91	4.27	8.7	9.72	0	2.04	3.36	0.88	2.8	Gene body	NM_133964	Dohh	NM_133964	deoxyhypusine hydroxylase/monooxygenase
chr10	80870369	1.87	2.7	1.71	2.68	14.29	10.62	15.79	6.8	10.26	3.48	4.86	8	6.12	4.2	4.42	9.35	Gene body	Y07693	Nfic	NM_008688	nuclear factor I/C isoform a
chr10	80871572	39.25	41.44	42.74	48.21	19.64	19.47	19.3	20.39	24.79	26.09	26.39	24	17.35	24.37	44.25	23.36	Gene body	AF358457	Nfic	NM_008688	nuclear factor I/C isoform a
chr10	80881286	33.64	27.93	41.03	24.11	8.04	9.73	7.02	5.83	8.55	19.13	22.92	11	4.08	13.45	8.85	6.54	Gene body	AF358457	Nfic	NM_008688	nuclear factor I/C isoform a
chr10	80884594	50.47	54.05	51.28	51.79	8.04	8.85	10.53	15.53	9.4	20	40.97	27	2.04	10.92	13.27	8.41	TSS	AF358457	Nfic	NM_008688	nuclear factor I/C isoform a
chr10	80889070	34.58	35.14	40.17	41.07	22.32	20.35	19.3	18.45	18.8	10.43	19.44	28	14.29	10.92	30.97	20.56	TSS	NM_008688	Nfic	NM_008688	nuclear factor I/C isoform a
chr10	80896399	43.93	48.65	36.75	44.64	17.86	10.62	23.68	19.42	18.8	43.48	52.08	21	17.35	15.97	20.35	24.3	TSS	Y07693	Nfic	NM_008688	nuclear factor I/C isoform a
chr10	80896483	29.91	25.23	33.33	41.07	6.25	6.19	5.26	7.77	13.68	12.17	20.83	8	2.04	15.97	10.62	0.93	TSS	Y07693	Nfic	NM_008688	nuclear factor I/C isoform a
chr10	80898336	42.99	30.63	41.88	41.96	16.07	18.58	11.4	15.53	18.8	19.13	26.39	18	7.14	16.81	33.63	18.69	Intergenic
chr10	80924097	14.95	9.01	13.68	10.71	3.57	5.31	2.63	2.91	3.42	3.48	4.17	4	10.2	6.72	11.5	4.67	Gene body	BC079845	BC079845		Mus musculus adult male testis cDNA, RIKEN full-length enriched library, clone:4930565A21 product:similar to CUG-BP AND ETR-3 LIKE FACTOR 5 [Homo sapiens], full insert sequence.
chr10	80961113	20.56	20.72	18.8	18.75	29.46	29.2	24.56	29.13	25.64	20	24.31	26	35.71	21.85	29.2	20.56	3End	NM_010102	Edg6	NM_010102	endothelial differentiation, G-protein-coupled
chr10	81038073	0	0.9	0	0	8.04	16.81	8.77	4.85	11.11	6.09	4.17	8	3.06	7.56	0	9.35	TSS	AK144581	Tle2	NM_019725	transducin-like enhancer protein 2
chr10	82034349	32.71	49.55	41.03	35.71	14.29	17.7	15.79	15.53	15.38	6.09	14.58	8	17.35	10.08	11.5	9.35	Intergenic
chr10	82231832	10.28	11.71	9.4	17.86	31.25	51.33	59.65	50.49	56.41	19.13	29.86	51	37.76	32.77	36.28	38.32	Intergenic
chr10	82251241	45.79	36.04	55.56	40.18	17.86	15.93	11.4	17.48	18.8	13.91	33.33	21	8.16	18.49	28.32	7.48	Intergenic
chr10	82323404	0	0	0	0.89	6.25	4.42	13.16	3.88	11.97	10.43	2.08	2	5.1	12.61	3.54	20.56	TSS	NM_001042514	Txnrd1	NM_001042514	thioredoxin reductase 1 isoform 2
chr10	82417300	1.87	1.8	2.56	0.89	5.36	16.81	3.51	8.74	4.27	12.17	11.11	11	15.31	11.76	12.39	5.61	Intergenic
chr10	82523906	11.21	13.51	17.09	12.5	7.14	2.65	7.02	9.71	5.13	5.22	8.33	6	6.12	3.36	5.31	5.61	Gene body	NM_021439	Chst11	NM_021439	carbohydrate sulfotransferase 11
chr10	82800593	25.23	22.52	15.38	20.54	81.25	46.02	58.77	63.11	53.85	64.35	36.11	43	74.49	28.57	25.66	100	TSS	NM_177388	Slc41a2	NM_177388	solute carrier family 41, member 2
chr10	82831750	12.15	10.81	12.82	8.93	4.46	2.65	1.75	2.91	3.42	7.83	4.17	6	5.1	5.04	7.08	6.54	3End	NM_026579	D10Wsu102e	NM_026579	hypothetical protein LOC28109
chr10	83098231	41.12	35.14	25.64	32.14	94.64	169.03	147.37	97.09	137.61	88.7	65.97	85	101.02	89.92	106.19	99.07	Gene body	NM_145220	Appl2	NM_145220	adaptor protein, phosphotyrosine interaction, PH
chr10	83190871	18.69	12.61	23.08	17.86	4.46	5.31	3.51	3.88	6.84	13.04	4.86	9	5.1	5.88	12.39	7.48	Gene body	AK005183	AK005183		Mus musculus adult male cerebellum cDNA, RIKEN full-length enriched library, clone:1500009L16 product:hypothetical protein, full insert sequence.
chr10	84286557	28.04	39.64	34.19	38.39	9.82	17.7	8.77	11.65	13.68	9.57	11.81	10	11.22	14.29	19.47	5.61	Intergenic
chr10	84846919	25.23	28.83	23.93	23.21	14.29	10.62	14.91	33.98	18.8	14.78	16.67	18	13.27	12.61	13.27	12.15	Intergenic
chr10	85391539	6.54	9.01	5.98	4.46	42.86	18.58	30.7	39.81	21.37	46.96	24.31	30	32.65	6.72	5.31	37.38	TSS	AK018959	AK018959		Mus musculus adult male testis cDNA, RIKEN full-length enriched library, clone:1700054F16 product:unclassifiable, full insert sequence.
chr10	85484980	28.04	30.63	31.62	34.82	45.54	45.13	54.39	23.3	34.19	32.17	31.94	46	46.94	50.42	44.25	53.27	TSS	AK150190	Fbxo7	NM_153195	F-box only protein 7
chr10	86291510	14.95	11.71	8.55	13.39	2.68	0	1.75	5.83	1.71	18.26	13.19	3	3.06	1.68	0.88	1.87	Gene body	AY651022	Nt5dc3	NM_175331	5'-nucleotidase domain containing 3
chr10	86952561	38.32	35.14	52.99	40.18	8.93	16.81	14.91	9.71	15.38	20.87	11.81	8	18.37	16.81	29.2	6.54	3End	NM_008553	Ascl1	NM_008553	achaete-scute complex homolog-like 1
chr10	86955556	1.87	1.8	0.85	0.89	10.71	8.85	7.02	7.77	20.51	10.43	4.86	6	5.1	0	0.88	3.74	TSS	NM_008553	Ascl1	NM_008553	achaete-scute complex homolog-like 1
chr10	87820185	90.65	95.5	82.05	85.71	161.61	128.32	133.33	153.4	130.77	152.17	110.42	107	162.24	93.28	90.27	124.3	TSS	NM_027878	1200002N14Rik	NM_027878	damage-regulated autophagy modulator
chr10	87852501	11.21	8.11	9.4	10.71	22.32	21.24	23.68	27.18	17.95	23.48	13.19	13	29.59	13.45	24.78	12.15	Gene body	NM_001004164	Gnptab	NM_001004164	N-acetylglucosamine-1-phosphate transferase
chr10	88913483	82.24	63.06	94.02	93.75	20.54	16.81	21.05	21.36	38.46	26.96	53.47	22	5.1	49.58	37.17	32.71	Intergenic
chr10	89183753	20.56	22.52	25.64	16.07	23.21	22.12	21.93	31.07	28.21	21.74	18.06	10	10.2	12.61	8.85	7.48	Gene body	NM_025914	Actr6	NM_025914	actin-related protein 6
chr10	89553110	19.63	13.51	17.09	16.07	7.14	7.96	5.26	8.74	6.84	9.57	5.56	6	6.12	5.04	11.5	6.54	Intergenic
chr10	90388812	16.82	17.12	14.53	11.61	2.68	3.54	2.63	3.88	3.42	5.22	11.81	5	13.27	8.4	4.42	4.67	3End	AK038609	Anks1b		Mus musculus adult male hippocampus cDNA, RIKEN full-length enriched library, clone:2900084A04 product:PUTATIVE 47 KDA PROTEIN homolog [Homo sapiens], full insert sequence.
chr10	92457281	30.84	32.43	26.5	28.57	42.86	49.56	51.75	45.63	41.88	41.74	38.19	39	73.47	37.82	40.71	42.06	Intergenic
chr10	92501210	12.15	9.01	13.68	11.61	1.79	3.54	2.63	3.88	1.71	4.35	2.08	5	3.06	3.36	8.85	4.67	Intergenic
chr10	92644636	0	0	0.85	0	8.93	3.54	3.51	8.74	7.69	6.09	3.47	9	10.2	5.88	7.08	9.35	Gene body	BC064815	Pctk2		Serine/threonine-protein kinase PCTAIRE-2 (EC 2.7.11.22) (PCTAIRE- motif protein kinase 2).
chr10	92772913	0.93	1.8	0.85	1.79	73.21	46.02	73.68	67.96	65.81	83.48	63.19	47	74.49	42.02	28.32	77.57	TSS	NM_013508	Elk3	NM_013508	ELK3, member of ETS oncogene family isoform a
chr10	92901448	0.93	0	0	0	11.61	10.62	13.16	4.85	7.69	13.04	4.17	15	9.18	13.45	7.08	5.61	Intergenic
chr10	93070903	0	0.9	0.85	0	10.71	7.96	9.65	11.65	9.4	6.96	8.33	15	9.18	8.4	7.96	20.56	Intergenic
chr10	93118777	0	0	0	0	8.04	4.42	8.77	7.77	11.97	12.17	9.03	11	6.12	10.08	8.85	3.74	Gene body	NM_021320	Ntn4	NM_021320	netrin 4
chr10	93219976	0	0	0	0	6.25	13.27	8.77	3.88	16.24	11.3	11.81	7	15.31	10.08	10.62	4.67	Intergenic
chr10	93940472	48.6	36.04	35.04	37.5	11.61	9.73	13.16	12.62	12.82	38.26	28.47	21	10.2	11.76	13.27	8.41	Intergenic
chr10	94780813	20.56	20.72	30.77	28.57	1.79	8.85	9.65	9.71	5.13	23.48	18.06	6	4.08	10.08	7.96	6.54	TSS	AK087886	AK087886		Mus musculus 2 days pregnant adult female ovary cDNA, RIKEN full-length enriched library, clone:E330036K19 product:CASP2 and RIPK1 domain containing adaptor with death domain, full insert sequence.
chr10	94938768	20.56	12.61	24.79	17.86	3.57	5.31	2.63	3.88	5.13	2.61	4.86	7	6.12	8.4	8.85	7.48	Intergenic
chr10	94977172	39.25	37.84	37.61	41.96	57.14	55.75	61.4	71.84	55.56	46.96	63.19	70	51.02	62.18	46.9	64.49	TSS	NM_080560	Ube2n	NM_080560	ubiquitin-conjugating enzyme E2N
chr10	95022692	23.36	17.12	20.51	34.82	5.36	1.77	2.63	6.8	3.42	15.65	11.11	21	4.08	4.2	9.73	5.61	Gene body	NM_027722	Nudt4	NM_027722	nudix-type motif 4
chr10	95543273	29.91	32.43	41.03	36.61	13.39	15.93	13.16	17.48	21.37	15.65	22.92	19	11.22	29.41	37.17	7.48	Intergenic
chr10	95808036	15.89	16.22	13.68	16.07	5.36	7.08	6.14	8.74	5.98	4.35	9.72	7	5.1	13.45	13.27	6.54	Intergenic
chr10	96960509	32.71	33.33	42.74	42.86	14.29	17.7	15.79	13.59	18.8	14.78	13.89	12	17.35	26.05	32.74	14.02	Gene body	NM_007833	Dcn	NM_007833	decorin
chr10	99078512	16.82	10.81	11.11	14.29	5.36	2.65	4.39	2.91	5.13	6.96	17.36	10	5.1	8.4	7.96	11.21	Gene body	AK039362	AK039362		Mus musculus adult male spinal cord cDNA, RIKEN full-length enriched library, clone:A330032E09 product:unclassifiable, full insert sequence.
chr10	99143898	65.42	66.67	62.39	69.64	25	62.83	38.6	27.18	52.14	67.83	62.5	42	42.86	35.29	37.17	34.58	Intergenic
chr10	99950286	6.54	1.8	1.71	2.68	100	26.55	68.42	69.9	38.46	66.09	45.83	55	79.59	15.97	16.81	117.76	TSS	NM_001033332	Tmtc3	NM_001033332	transmembrane and tetratricopeptide repeat
chr10	102685884	14.95	14.41	19.66	16.96	8.04	6.19	7.02	3.88	13.68	6.09	9.03	9	6.12	7.56	7.08	5.61	Gene body	AK015687	Lrriq1		Hypothetical protein.
chr10	107885550	19.63	29.73	24.79	26.79	3.57	5.31	4.39	6.8	7.69	9.57	19.44	14	7.14	5.88	5.31	9.35	Intergenic
chr10	107885566	19.63	22.52	30.77	25	10.71	15.04	18.42	12.62	10.26	23.48	19.44	10	7.14	10.92	8.85	7.48	Intergenic
chr10	110908989	14.02	9.91	11.97	17.86	2.68	2.65	4.39	4.85	4.27	13.04	11.81	4	4.08	3.36	0.88	2.8	TSS	AK153531	Nap1l1	NM_015781	nucleosome assembly protein 1-like 1
chr10	110910292	0.93	0	0.85	0.89	16.07	4.42	10.53	10.68	10.26	13.91	6.25	14	12.24	0.84	0.88	23.36	TSS	D12618	Nap1l1	NM_015781	nucleosome assembly protein 1-like 1
chr10	111004196	30.84	31.53	28.21	22.32	45.54	49.56	55.26	54.37	47.01	49.57	40.28	34	34.69	29.41	27.43	35.51	Intergenic
chr10	111019925	20.56	18.02	20.51	25.89	4.46	10.62	10.53	9.71	7.69	6.09	6.94	10	6.12	8.4	9.73	8.41	Intergenic
chr10	111032303	19.63	14.41	16.24	18.75	3.57	6.19	2.63	5.83	8.55	2.61	6.25	3	3.06	5.04	2.65	5.61	Intergenic
chr10	111271213	23.36	19.82	18.8	24.11	12.5	10.62	8.77	9.71	16.24	10.43	23.61	11	9.18	11.76	11.5	11.21	Intergenic
chr10	111707268	17.76	18.02	11.97	14.29	3.57	5.31	2.63	2.91	5.98	3.48	8.33	5	11.22	9.24	22.12	9.35	TSS	BC116290	Kcnc2	NM_001025581	potassium voltage gated channel, Shaw-related
chr10	111709001	0.93	0	0.85	0	8.93	8.85	11.4	2.91	9.4	10.43	0.69	3	0	6.72	0.88	9.35	TSS	NM_001025581	Kcnc2	NM_001025581	potassium voltage gated channel, Shaw-related
chr10	114180053	7.48	6.31	5.98	7.14	12.5	15.04	16.67	12.62	17.09	13.04	17.36	8	9.18	13.45	11.5	8.41	Intergenic
chr10	114688599	36.45	24.32	34.19	40.18	33.04	14.16	12.28	29.13	19.66	21.74	36.11	13	9.18	10.92	14.16	9.35	TSS	NM_025706	Tbc1d15	NM_025706	TBC1 domain family, member 15
chr10	114796172	13.08	7.21	13.68	10.71	0.89	3.54	2.63	0.97	3.42	0.87	5.56	2	1.02	2.52	2.65	0.93	Gene body	AK018383	Tmem19	NM_133683	transmembrane protein 19
chr10	117588078	22.43	23.42	17.09	23.21	6.25	6.19	7.89	9.71	9.4	12.17	20.14	27	6.12	16.81	8.85	4.67	3End	NM_010785	Mdm1	NM_010785	transformed mouse 3T3 cell double minute 1
chr10	118845784	9.35	10.81	16.24	9.82	2.68	1.77	2.63	1.94	4.27	6.96	11.11	12	3.06	6.72	7.96	6.54	Intergenic
chr10	119239454	14.95	11.71	22.22	18.75	5.36	4.42	2.63	2.91	2.56	6.96	4.86	7	3.06	5.04	12.39	0.93	Intergenic
chr10	119402693	21.5	18.02	19.66	16.07	5.36	7.08	7.89	7.77	9.4	9.57	13.19	10	12.24	15.97	18.58	4.67	Intergenic
chr10	119914001	29.91	31.53	29.91	25	27.68	40.71	29.82	28.16	36.75	53.91	43.06	66	58.16	62.18	68.14	76.64	TSS	AK147859	Hmga2		Mus musculus 12 days embryo embryonic body below diaphragm region cDNA, RIKEN full-length enriched library, clone:3732424D23 product:high mobility group AT-hook 2, full insert sequence.
chr10	120121070	0	0	0	0.89	35.71	19.47	29.82	18.45	17.09	40	13.89	16	13.27	6.72	7.96	0	Intergenic
chr10	120558825	9.35	7.21	10.26	5.36	0	0.88	0	1.94	0	12.17	4.17	0	0	0	0.88	0	Intergenic
chr10	120747953	22.43	18.92	19.66	21.43	39.29	38.05	22.81	15.53	17.95	20.87	20.83	43	45.92	36.13	32.74	33.64	TSS	AK044521	4930505D03Rik		MKIAA0984 protein (Fragment).
chr10	120765253	5.61	7.21	7.69	5.36	1.79	8.85	10.53	16.5	10.26	9.57	19.44	14	21.43	18.49	18.58	14.95	Intergenic
chr10	120788416	13.08	7.21	8.55	9.82	0.89	1.77	1.75	1.94	1.71	0	4.17	3	2.04	3.36	7.96	1.87	Intergenic
chr10	121310192	14.95	18.92	15.38	17.86	5.36	7.96	3.51	4.85	5.98	2.61	9.03	6	7.14	8.4	8.85	0.93	Intergenic
chr10	121362040	14.95	20.72	20.51	17.86	5.36	6.19	8.77	7.77	5.13	6.96	3.47	4	6.12	8.4	13.27	5.61	Intergenic
chr10	122349970	22.43	18.02	15.38	16.07	61.61	59.29	39.47	45.63	48.72	61.74	41.67	40	80.61	58.82	46.9	55.14	Gene body	NM_176919	Ppm1h	NM_176919	protein phosphatase 1H (PP2C domain containing)
chr10	122743091	16.82	21.62	16.24	21.43	6.25	3.54	1.75	3.88	4.27	4.35	5.56	4	3.06	4.2	9.73	0	Gene body	AK032483	AI851790	NM_182807	TAFA2 protein
chr10	124558557	0.93	0	0.85	0.89	5.36	7.08	10.53	5.83	13.68	4.35	3.47	5	16.33	6.72	6.19	6.54	Intergenic
chr10	124774951	11.21	9.01	8.55	9.82	18.75	22.12	24.56	22.33	17.09	13.91	15.97	18	17.35	25.21	15.93	9.35	Intergenic
chr10	124826480	0.93	0.9	0	1.79	60.71	20.35	33.33	52.43	25.64	33.04	26.39	31	43.88	16.81	15.04	58.88	Intergenic
chr10	125423903	57.94	37.84	60.68	53.57	3.57	10.62	8.77	16.5	12.82	55.65	53.47	12	8.16	18.49	7.08	11.21	Gene body	AK035166	Lrig3	NM_177152	leucine-rich repeats and immunoglobulin-like
chr10	125456555	39.25	35.14	42.74	38.39	24.11	25.66	24.56	27.18	23.93	20.87	46.53	37	18.37	30.25	31.86	25.23	Intergenic
chr10	126267322	10.28	11.71	12.82	8.93	5.36	2.65	3.51	3.88	4.27	10.43	9.72	4	5.1	7.56	9.73	5.61	Intergenic
chr10	126386703	31.78	33.33	28.21	30.36	42.86	50.44	46.49	52.43	56.41	46.09	38.19	33	54.08	46.22	32.74	39.25	Intergenic
chr10	126479071	5.61	6.31	6.84	6.25	24.11	25.66	32.46	29.13	17.09	29.57	15.97	23	30.61	18.49	20.35	28.04	TSS	NM_010792	Mettl1	NM_010792	methyltransferase-like 1
chr10	126517653	27.1	23.42	25.64	30.36	57.14	41.59	47.37	60.19	49.57	42.61	34.72	54	44.9	48.74	44.25	50.47	TSS	AK220325	Centg1	NM_001033263	centaurin, gamma 1
chr10	126777880	7.48	8.11	5.13	8.04	25	18.58	18.42	24.27	23.08	19.13	11.11	9	15.31	11.76	8.85	22.43	TSS	BC131649	Gli1		Mus musculus Gli1 mRNA, complete cds.
chr10	126811000	31.78	36.94	42.74	41.96	16.96	9.73	23.68	39.81	18.8	20	48.61	21	18.37	15.13	13.27	20.56	Intergenic
chr10	126957928	1.87	2.7	2.56	2.68	25	18.58	16.67	18.45	15.38	9.57	4.86	5	11.22	4.2	5.31	13.08	TSS	AK169192	Shmt2	NM_028230	serine hydroxymethyltransferase 2
chr10	127008314	27.1	36.04	39.32	27.68	9.82	13.27	8.77	12.62	11.11	16.52	25.69	20	6.12	9.24	12.39	8.41	Intergenic
chr10	127009511	38.32	45.05	54.7	50.89	15.18	19.47	18.42	14.56	22.22	14.78	22.22	29	10.2	21.01	25.66	13.08	Intergenic
chr10	127037409	15.89	12.61	15.38	16.96	4.46	7.96	3.51	4.85	5.13	4.35	12.5	11	7.14	2.52	10.62	4.67	Gene body	AK153549	Lrp1		Bone marrow macrophage cDNA, RIKEN full-length enriched library, clone:I830174K15 product:low density lipoprotein receptor-related protein 1, full insert sequence (Bone marrow macrophage cDNA, RIKEN full-length enriched library, clone:I830150I18 product:l
chr10	127049766	43.93	39.64	37.61	43.75	17.86	25.66	21.93	24.27	22.22	10.43	29.86	33	15.31	15.97	47.79	13.08	Gene body	NM_008512	Lrp1	NM_008512	low density lipoprotein receptor-related protein
chr10	127079761	68.22	68.47	63.25	67.86	108.93	98.23	100	89.32	89.74	64.35	64.58	107	72.45	83.19	55.75	66.36	TSS	NM_009284	Stat6	NM_009284	signal transducer and activator of transcription
chr10	127340342	13.08	18.92	20.51	13.39	3.57	1.77	5.26	3.88	5.98	13.04	18.75	3	2.04	5.88	4.42	2.8	TSS	AK007857	Sdro	NM_027301	retinol dehydrogenase similar protein
chr10	127342399	93.46	82.88	71.79	75.89	25.89	39.82	47.37	41.75	45.3	82.61	95.83	31	38.78	42.02	33.63	36.45	Gene body	AK007857	Sdro	NM_027301	retinol dehydrogenase similar protein
chr10	127399503	16.82	7.21	17.09	10.71	0.89	3.54	3.51	2.91	4.27	4.35	7.64	0	0	0.84	0.88	1.87	Intergenic
chr10	127473189	61.68	66.67	58.12	64.29	96.43	102.65	106.14	93.2	85.47	67.83	71.53	82	71.43	57.98	55.75	57.94	TSS	U48364	Naca	NM_013608	nascent polypeptide-associated complex alpha
chr10	127499652	21.5	27.93	23.08	24.11	8.93	24.78	9.65	8.74	12.82	10.43	12.5	10	9.18	14.29	11.5	9.35	Gene body	NM_019766	Ptges3	NM_019766	prostaglandin E synthase 3 (cytosolic)
chr10	127649279	32.71	31.53	30.77	33.93	15.18	14.16	12.28	16.5	16.24	9.57	18.06	21	15.31	8.4	22.12	28.04	TSS	NM_025716	Spryd4	NM_025716	SPRY domain containing 4
chr10	127691696	9.35	11.71	18.8	7.14	0	0.88	0.88	0.97	0	5.22	3.47	2	0	5.04	0	0.93	TSS	NM_133996	Apon	NM_133996	apolipoprotein N
chr10	127691819	40.19	28.83	35.04	28.57	0.89	3.54	2.63	2.91	1.71	14.78	20.83	6	1.02	5.04	0.88	0.93	TSS	NM_133996	Apon	NM_133996	apolipoprotein N
chr10	127691821	18.69	11.71	14.53	9.82	0.89	0	0.88	0.97	1.71	4.35	10.42	0	0	1.68	1.77	0	TSS	NM_133996	Apon	NM_133996	apolipoprotein N
chr10	127693541	14.95	12.61	19.66	10.71	0.89	0	0	0.97	1.71	2.61	6.94	0	1.02	0.84	0.88	0.93	3End	NM_133996	Apon	NM_133996	apolipoprotein N
chr10	127805155	30.84	33.33	28.21	25	13.39	15.04	12.28	8.74	12.82	16.52	15.97	18	5.1	13.45	13.27	10.28	TSS	NM_001081040	Coq10a	NM_001081040	coenzyme Q10 homolog A
chr10	127962632	0	0	0	0	10.71	7.96	14.04	6.8	13.68	12.17	0.69	0	1.02	6.72	0	16.82	TSS	NM_011843	Mbc2	NM_011843	membrane bound C2 domain containing protein
chr10	128133207	22.43	25.23	20.51	31.25	6.25	12.39	8.77	9.71	6.84	5.22	14.58	15	13.27	8.4	17.7	2.8	TSS	AK144551	Rab5b		12 days embryo spinal cord cDNA, RIKEN full-length enriched library, clone:C530035I24 product:RAB5B, member RAS oncogene family, full insert sequence (Adult male intestinal mucosa cDNA, RIKEN full-length enriched library, clone:G630095F06 product:RAB5B, m
chr10	128346792	27.1	27.03	32.48	29.46	9.82	8.85	6.14	4.85	9.4	9.57	9.03	20	9.18	19.33	28.32	12.15	TSS	NM_007653	Cd63	NM_007653	Cd63 antigen
chr11	3190829	24.3	24.32	20.51	19.64	54.46	30.97	50	36.89	29.06	31.3	40.28	41	48.98	33.61	46.02	53.27	TSS	NM_019574	Patz1	NM_019574	POZ (BTB) and AT hook containing zinc finger 1
chr11	3414896	38.32	41.44	41.03	39.29	86.61	66.37	79.82	86.41	80.34	90.43	52.78	64	63.27	54.62	46.02	122.43	TSS	NM_053267	Selm	NM_053267	selenoprotein M precursor
chr11	3415210	37.38	42.34	43.59	41.96	65.18	69.03	47.37	48.54	48.72	54.78	52.08	71	56.12	67.23	59.29	64.49	TSS	NM_053267	Selm	NM_053267	selenoprotein M precursor
chr11	3662207	0	0.9	0	0	8.93	7.96	7.02	3.88	11.97	10.43	0.69	4	2.04	5.04	0.88	5.61	Gene body	BC058356	Osbp2	NM_152818	oxysterol binding protein 2
chr11	3662250	1.87	0.9	0.85	1.79	9.82	3.54	4.39	4.85	3.42	5.22	4.17	12	11.22	7.56	4.42	12.15	Gene body	BC058356	Osbp2	NM_152818	oxysterol binding protein 2
chr11	3930256	27.1	23.42	29.91	21.43	0.89	1.77	0	0	0.85	1.74	0	2	0	0	0	1.87	TSS	NM_146013	Sec14l4	NM_146013	SEC14 (S. cerevisiae)-like 2
chr11	4051816	67.29	75.68	62.39	72.32	19.64	20.35	25.44	41.75	27.35	89.57	70.83	30	21.43	29.41	26.55	28.97	Intergenic
chr11	4588445	21.5	12.61	23.08	19.64	3.57	2.65	1.75	0.97	3.42	4.35	6.94	5	1.02	5.88	3.54	2.8	Intergenic
chr11	4600149	0	0	0	0	8.04	18.58	7.02	8.74	11.97	16.52	11.81	15	6.12	5.04	15.04	13.08	3End	NM_197979	1110020P15Rik	NM_197979	ubiquinol-cytochrome c reductase complex
chr11	4849502	72.9	56.76	66.67	57.14	21.43	31.86	24.56	23.3	30.77	32.17	26.39	22	17.35	37.82	58.41	15.89	TSS	NM_010904	Nefh	NM_010904	neurofilament, heavy polypeptide
chr11	5161924	73.83	78.38	69.23	78.57	100	113.27	109.65	95.15	105.98	66.09	89.58	110	86.73	75.63	72.57	118.69	TSS	NM_032396	Kremen1	NM_032396	kringle-containing transmembrane protein 1
chr11	5205640	8.41	8.11	9.4	9.82	0	0	0.88	3.88	1.71	4.35	3.47	2	1.02	2.52	0.88	1.87	Gene body	AK163639	Znrf3		Mus musculus adult male testis cDNA, RIKEN full-length enriched library, clone:4932437G23 product:hypothetical Zn-finger, RING/Zinc finger RING-type profile/Serine-rich region profile containing protein, full insert sequence.
chr11	5607292	71.03	79.28	81.2	69.64	108.93	127.43	141.23	116.5	116.24	109.57	97.92	116	94.9	131.09	95.58	111.21	TSS	NM_026080	Mrps24	NM_026080	mitochondrial ribosomal protein S24
chr11	5813041	14.02	6.31	14.53	8.04	0	0	0	1.94	0	3.48	12.5	0	0	1.68	0	0	Gene body	BC011139	Gck	NM_010292	glucokinase
chr11	5813348	13.08	6.31	17.09	12.5	0.89	4.42	0	0	0.85	4.35	8.33	1	0	1.68	1.77	0.93	TSS	BC011139	Gck	NM_010292	glucokinase
chr11	5816345	57.94	27.03	35.04	32.14	13.39	10.62	5.26	14.56	7.69	27.83	36.81	4	8.16	8.4	5.31	8.41	TSS	AK142698	Gck	NM_010292	glucokinase
chr11	5855320	40.19	45.05	47.01	38.39	20.54	24.78	17.54	19.42	18.8	18.26	33.33	45	11.22	17.65	32.74	11.21	TSS	NM_019661	Ykt6	NM_019661	YKT6 v-SNARE protein
chr11	5940948	96.26	66.67	47.01	74.11	12.5	11.5	13.16	26.21	29.06	107.83	98.61	22	9.18	18.49	17.7	12.15	Gene body	NM_007595	Camk2b	NM_007595	calcium/calmodulin-dependent protein kinase II,
chr11	6306787	18.69	19.82	17.95	14.29	30.36	28.32	35.96	44.66	27.35	22.61	25	28	34.69	42.02	38.05	40.19	3End	NM_001005867	Zmiz2	NM_001005867	zinc finger, MIZ-type containing 2 isoform 2
chr11	6344784	28.97	33.33	38.46	37.5	12.5	36.28	21.05	15.53	25.64	13.04	19.44	18	11.22	16.81	16.81	15.89	TSS	BC028539	H2afv		H2afv protein.
chr11	6524970	26.17	24.32	30.77	33.93	8.93	6.19	9.65	12.62	11.97	9.57	11.81	7	11.22	15.13	15.93	10.28	TSS	AK168088	Tbrg4	NM_134011	transforming growth factor beta regulated gene
chr11	7048083	27.1	18.92	32.48	23.21	3.57	7.96	5.26	5.83	5.98	20	15.28	8	4.08	15.13	6.19	9.35	Intergenic
chr11	7052255	37.38	22.52	26.5	33.93	2.68	2.65	3.51	0.97	1.71	9.57	38.89	4	2.04	4.2	4.42	3.74	Intergenic
chr11	7098102	28.04	28.83	24.79	24.11	16.96	18.58	14.91	15.53	17.95	17.39	18.06	21	7.14	11.76	13.27	11.21	TSS	NM_008341	Igfbp1	NM_008341	insulin-like growth factor binding protein 1
chr11	7130249	25.23	26.13	30.77	32.14	8.04	6.19	3.51	4.85	5.13	15.65	11.11	1	4.08	11.76	17.7	7.48	Intergenic
chr11	7986684	23.36	25.23	23.08	26.79	11.61	9.73	10.53	11.65	11.97	15.65	22.92	23	18.37	15.97	9.73	11.21	Intergenic
chr11	8910876	0.93	0	1.71	0	40.18	13.27	76.32	33.01	50.43	23.48	74.31	35	19.39	66.39	22.12	68.22	TSS	AK051839	Hus1		Mus musculus Hus1-like protein (Hus1) mRNA, complete cds.
chr11	9219555	0.93	0	0.85	0.89	5.36	4.42	7.89	3.88	5.98	3.48	7.64	5	9.18	9.24	7.08	11.21	Intergenic
chr11	11788545	54.21	37.84	41.03	47.32	13.39	21.24	14.91	30.1	29.06	41.74	45.83	26	16.33	15.97	15.93	17.76	TSS	NM_016672	Ddc	NM_016672	dopa decarboxylase
chr11	12129640	14.95	13.51	13.68	15.18	4.46	6.19	5.26	5.83	3.42	6.96	4.17	5	6.12	5.88	3.54	2.8	Intergenic
chr11	12896683	17.76	19.82	22.22	19.64	9.82	8.85	6.14	9.71	7.69	20.87	14.58	11	15.31	13.45	18.58	9.35	Intergenic
chr11	16157913	25.23	42.34	29.06	28.57	122.32	77.88	98.25	96.12	82.05	106.09	63.89	56	140.82	31.93	22.12	80.37	TSS	NM_145967	Vstm2a	NM_145967	V-set and transmembrane domain containing 2A
chr11	16652401	0	0.9	0	0	11.61	14.16	24.56	5.83	14.53	16.52	4.86	0	4.08	3.36	3.54	10.28	TSS	NM_207655	Egfr	NM_207655	epidermal growth factor receptor isoform 1
chr11	16851426	26.17	30.63	27.35	28.57	41.96	40.71	42.98	46.6	41.03	57.39	42.36	40	28.57	38.66	41.59	42.99	TSS	NM_176982	A630050E13Rik	NM_176982	hypothetical protein LOC319701
chr11	19823890	32.71	24.32	30.77	32.14	12.5	11.5	14.91	13.59	17.09	6.96	21.53	23	7.14	9.24	28.32	5.61	TSS	AK153700	Spred-2		Mus musculus mRNA for Spred-2, complete cds.
chr11	19826093	21.5	22.52	15.38	18.75	58.93	40.71	49.12	75.73	58.12	58.26	39.58	65	40.82	19.33	33.63	37.38	TSS	NM_033523	Spred2	NM_033523	sprouty-related protein with EVH-1 domain 2
chr11	20216670	15.89	10.81	17.09	16.96	0.89	2.65	2.63	2.91	4.27	3.48	4.17	0	1.02	3.36	1.77	0.93	Gene body	NM_018861	Slc1a4	NM_018861	solute carrier family 1 (glutamate/neutral amino
chr11	20232697	17.76	18.02	19.66	16.07	6.25	13.27	14.04	14.56	16.24	12.17	15.97	8	9.18	8.4	8.85	12.15	TSS	NM_018861	Slc1a4	NM_018861	solute carrier family 1 (glutamate/neutral amino
chr11	20272772	20.56	16.22	18.8	25	2.68	2.65	1.75	1.94	0.85	6.09	7.64	15	2.04	0.84	7.96	8.41	Intergenic
chr11	20272886	16.82	19.82	20.51	17.86	8.04	3.54	5.26	2.91	3.42	26.09	11.81	20	22.45	14.29	23.01	26.17	Intergenic
chr11	20556969	17.76	17.12	15.38	19.64	37.5	30.97	28.07	32.04	33.33	26.09	29.86	25	33.67	36.13	25.66	58.88	Intergenic
chr11	20920694	28.04	27.03	32.48	28.57	15.18	14.16	14.04	15.53	17.95	22.61	33.33	16	16.33	18.49	16.81	13.08	Intergenic
chr11	21901878	0	1.8	0.85	0.89	13.39	11.5	26.32	10.68	15.38	17.39	6.94	2	4.08	22.69	3.54	22.43	TSS	AK158588	Otx1	NM_011023	orthodenticle 1
chr11	22530402	15.89	11.71	11.97	15.18	4.46	6.19	6.14	6.8	4.27	2.61	5.56	6	6.12	5.04	7.96	1.87	Intergenic
chr11	22908104	0.93	0	0	0	7.14	5.31	14.04	4.85	11.11	15.65	4.17	1	1.02	8.4	0.88	11.21	TSS	BC024460	4930430E16Rik	NM_028672	hypothetical protein LOC73873
chr11	23155673	18.69	13.51	16.24	17.86	8.93	5.31	4.39	4.85	5.98	4.35	9.03	5	4.08	3.36	8.85	10.28	TSS	NM_134014	Xpo1	NM_134014	exportin 1, CRM1 homolog
chr11	23206143	43.93	47.75	52.14	46.43	19.64	24.78	24.56	23.3	29.06	16.52	27.08	22	17.35	26.05	46.9	28.97	TSS	AK148805	Usp34		2 days neonate sympathetic ganglion cDNA, RIKEN full-length enriched library, clone:7120448K24 product:hypothetical Glutamic acid-rich region profile/Serine-rich region profile containing protein, full insert sequence. (Fragment).
chr11	23533900	76.64	43.24	48.72	68.75	80.36	89.38	93.86	100	86.32	85.22	82.64	66	70.41	63.87	62.83	62.62	TSS	BC055049	mKIAA1841		Mus musculus adult male kidney cDNA, RIKEN full-length enriched library, clone:0610010F05 product:RIKEN cDNA 0610010F05 gene, full insert sequence.
chr11	23567318	43.93	41.44	51.28	41.07	28.57	21.24	26.32	27.18	22.22	24.35	47.92	47	28.57	25.21	30.09	22.43	TSS	NM_028304	Ccdc139	NM_028304	coiled-coil domain containing 139
chr11	23979332	28.97	22.52	29.06	22.32	64.29	53.98	57.89	73.79	73.5	71.3	39.58	54	52.04	41.18	35.4	62.62	TSS	BC051418	Bcl11a		B-cell lymphoma/leukemia 11A (B-cell CLL/lymphoma 11A) (COUP-TF- interacting protein 1) (Ecotropic viral integration site 9 protein) (EVI-9).
chr11	24457616	28.97	29.73	32.48	24.11	7.14	13.27	14.04	13.59	17.95	18.26	30.56	17	16.33	11.76	16.81	14.95	Gene body	AK148130	AK148130		Mus musculus adult male testis cDNA, RIKEN full-length enriched library, clone:4933430M04 product:unclassifiable, full insert sequence.
chr11	28483362	7.48	5.41	4.27	4.46	21.43	13.27	21.05	15.53	20.51	20	13.19	13	15.31	14.29	7.08	26.17	TSS	NM_181577	Ccdc85a	NM_181577	coiled-coil domain containing 85A
chr11	29030940	22.43	23.42	20.51	25.89	39.29	41.59	43.86	43.69	34.19	50.43	41.67	38	46.94	21.01	29.2	42.99	TSS	NM_027869	Pnpt1	NM_027869	polyribonucleotide nucleotidyltransferase 1
chr11	29593574	10.28	6.31	5.98	9.82	42.86	25.66	41.23	53.4	24.79	29.57	36.11	47	29.59	21.85	10.62	68.22	TSS	NM_194051	Rtn4	NM_194051	reticulon 4 isoform D
chr11	30785525	0	0.9	0	0	8.93	11.5	16.67	5.83	15.38	6.96	6.94	9	7.14	10.08	5.31	13.08	TSS	AK141614	Gpr75	NM_175490	G protein-coupled receptor 75
chr11	30785606	0	0	0	0.89	8.04	4.42	4.39	3.88	7.69	6.96	5.56	8	4.08	6.72	7.96	12.15	TSS	AK141614	Gpr75	NM_175490	G protein-coupled receptor 75
chr11	30854409	0	0	0	0	20.54	17.7	8.77	9.71	10.26	14.78	16.67	13	23.47	20.17	14.16	33.64	TSS	AK028489	Asb3		Mus musculus ankyrin repeat-containing protein Asb-3 mRNA, partial cds.
chr11	31269077	57.94	65.77	61.54	50.89	34.82	30.09	35.96	36.89	30.77	26.09	61.11	51	48.98	49.58	60.18	49.53	TSS	AK046655	Stc2		Mus musculus stanniocalcin (Stc2) mRNA, complete cds.
chr11	31969340	12.15	10.81	8.55	15.18	4.46	7.96	3.51	1.94	5.13	2.61	2.78	3	4.08	3.36	4.42	1.87	Intergenic
chr11	32098988	24.3	18.02	23.93	24.11	44.64	68.14	56.14	71.84	57.26	63.48	52.78	37	60.2	34.45	51.33	41.12	TSS	BC111909	Il9r	NM_008374	interleukin 9 receptor
chr11	32115603	30.84	60.36	23.93	36.61	0.89	1.77	0.88	2.91	5.13	4.35	2.08	24	23.47	15.13	2.65	22.43	Gene body	NM_010117	Rhbdf1	NM_010117	rhomboid family 1
chr11	32115678	43.93	62.16	33.33	65.18	9.82	5.31	3.51	9.71	3.42	11.3	15.97	50	38.78	25.21	6.19	31.78	Gene body	NM_010117	Rhbdf1	NM_010117	rhomboid family 1
chr11	32167386	3.74	1.8	0.85	0.89	63.39	15.93	51.75	64.08	24.79	66.09	52.08	46	43.88	3.36	7.08	92.52	TSS	AK039600	Mpg		Adult male bone cDNA, RIKEN full-length enriched library, clone:9830144A18 product:SIMILAR TO CONSERVED GENE TELOMERIC TO ALPHA GLOBIN CLUSTER (UNKNOWN) (PROTEIN FOR MGC:4491) homolog.
chr11	32241293	21.5	19.82	20.51	30.36	49.11	72.57	67.54	52.43	68.38	61.74	52.08	39	56.12	52.94	57.52	43.93	Intergenic
chr11	32245757	36.45	42.34	40.17	34.82	107.14	115.93	124.56	109.71	117.95	93.91	93.75	97	103.06	48.74	124.78	47.66	TSS	AK163471	Sh3pxd2b		NOD-derived CD11c +ve dendritic cells cDNA, RIKEN full-length enriched library, clone:F630006G23 product:hypothetical SH3/Phox-like/Src homology 3 (SH3) domain profile/PX domain profile containing protein, full insert sequence (Adult male corpora quadrige
chr11	32248342	15.89	14.41	14.53	19.64	26.79	30.97	61.4	34.95	46.15	47.83	54.17	46	37.76	36.97	37.17	28.97	TSS	NM_177364	Sh3pxd2b	NM_177364	SH3 and PX domains 2B
chr11	32436699	12.15	14.41	11.11	12.5	0.89	1.77	3.51	0.97	1.71	5.22	3.47	2	4.08	6.72	7.08	2.8	Gene body	BC069840	mKIAA4026		Mus musculus B16 F10Y cells cDNA, RIKEN full-length enriched library, clone:G370024C19 product:serine/threonine kinase 10, full insert sequence.
chr11	32533737	12.15	11.71	11.97	16.07	0	0	0.88	0	0	0	0	0	1.02	12.61	0	7.48	Intergenic
chr11	32536161	16.82	15.32	18.8	11.61	0	0	0	0	0	0	0	0	1.02	5.04	0	11.21	Intergenic
chr11	32541981	52.34	44.14	41.88	48.21	66.07	76.99	69.3	83.5	77.78	58.26	75	79	60.2	38.66	47.79	42.99	TSS	AK179700	mKIAA0696		Mus musculus mRNA for mKIAA0696 protein.
chr11	32580233	38.32	37.84	32.48	33.04	16.96	22.12	15.79	17.48	36.75	41.74	17.36	19	20.41	25.21	17.7	22.43	Gene body	AK179700	mKIAA0696		Mus musculus mRNA for mKIAA0696 protein.
chr11	32848804	43.93	36.94	47.01	39.29	19.64	13.27	16.67	20.39	22.22	20	38.89	33	41.84	33.61	20.35	35.51	Intergenic
chr11	33104718	5.61	7.21	6.84	8.04	24.11	15.93	60.53	27.18	41.88	33.91	34.72	32	38.78	21.85	27.43	36.45	TSS	NM_019916	Tlx3	NM_019916	T-cell leukemia, homeobox 3
chr11	33644896	14.95	9.91	11.97	15.18	1.79	5.31	2.63	0.97	4.27	2.61	2.08	3	5.1	2.52	2.65	3.74	Gene body	NM_027398	Kcnip1	NM_027398	Kv channel-interacting protein 1
chr11	33730192	14.95	17.12	12.82	20.54	7.14	5.31	4.39	5.83	6.84	3.48	4.86	8	5.1	10.92	16.81	9.35	Gene body	NM_027398	Kcnip1	NM_027398	Kv channel-interacting protein 1
chr11	33832001	27.1	20.72	31.62	21.43	6.25	7.96	7.02	3.88	9.4	10.43	4.17	5	7.14	4.2	0	7.48	Intergenic
chr11	33909095	12.15	9.01	18.8	15.18	0	0.88	0	0	0	0	0	0	0	0	0	3.74	Intergenic
chr11	33911071	17.76	17.12	16.24	13.39	1.79	0	0	0	0.85	0	0	0	0	0	0	10.28	Intergenic
chr11	34025464	10.28	9.91	5.98	5.36	1.79	0	0	0	0	0	0	0	0	0	0	1.87	Intergenic
chr11	34218518	15.89	17.12	11.97	10.71	0	0	0	0	0.85	0	0.69	0	0	0.84	0	5.61	Gene body	NM_001025382	EG574403	NM_001025382	hypothetical protein LOC574403
chr11	34235117	9.35	7.21	9.4	8.04	0	0	0	0	0	0	0	0	0	0	0	2.8	Gene body	NM_001025382	EG574403	NM_001025382	hypothetical protein LOC574403
chr11	34256151	15.89	14.41	10.26	15.18	0	0	0	0	0.85	0	0	0	0	0	0	0.93	Gene body	NM_001025382	EG574403	NM_001025382	hypothetical protein LOC574403
chr11	34311864	53.27	34.23	51.28	49.11	8.93	10.62	11.4	3.88	9.4	8.7	14.58	9	8.16	19.33	10.62	7.48	Gene body	NM_001025382	EG574403	NM_001025382	hypothetical protein LOC574403
chr11	34331510	48.6	35.14	23.93	37.5	0.89	0.88	0	0	0	0.87	0.69	0	0	0	0	24.3	Intergenic
chr11	34347958	13.08	9.91	17.09	10.71	0	0	0	0	0	0	0	0	0	0	0	8.41	Gene body	AK089682	Dock2	NM_033374	dedicator of cyto-kinesis 2
chr11	34360781	14.02	9.91	8.55	8.93	0.89	0	0	0	0.85	0	0	0	0	0	0	2.8	Gene body	AK089682	Dock2	NM_033374	dedicator of cyto-kinesis 2
chr11	34383839	12.15	13.51	13.68	12.5	4.46	5.31	3.51	5.83	5.13	5.22	11.81	8	9.18	9.24	11.5	6.54	Gene body	AK089682	Dock2	NM_033374	dedicator of cyto-kinesis 2
chr11	34410019	8.41	5.41	8.55	8.93	0	0	0	0	0	0	0	0	0	0	0	1.87	Gene body	AK089682	Dock2	NM_033374	dedicator of cyto-kinesis 2
chr11	34418712	13.08	18.92	14.53	16.07	0	0	0	0	0	0	0	0	0	0	0	6.54	Gene body	AK089682	Dock2	NM_033374	dedicator of cyto-kinesis 2
chr11	34425109	13.08	15.32	22.22	8.93	0.89	0	0	0	0	0	0.69	0	0	0	0	14.95	Gene body	AK089682	Dock2	NM_033374	dedicator of cyto-kinesis 2
chr11	34506874	13.08	29.73	19.66	21.43	0	1.77	0	0.97	0	0	0	0	0	0	0	1.87	Gene body	AK089682	Dock2	NM_033374	dedicator of cyto-kinesis 2
chr11	34526592	10.28	11.71	5.13	8.04	0	0	0	0	0	0.87	0	0	0	0	0	1.87	Gene body	AK089682	Dock2	NM_033374	dedicator of cyto-kinesis 2
chr11	34542739	38.32	34.23	35.04	35.71	81.25	87.61	66.67	71.84	92.31	75.65	84.03	58	91.84	62.18	71.68	31.78	Gene body	AK089682	Dock2	NM_033374	dedicator of cyto-kinesis 2
chr11	34552864	14.95	9.01	18.8	16.96	0	0	0	0	0	0	0	0	0	0	0	1.87	Gene body	AK089682	Dock2	NM_033374	dedicator of cyto-kinesis 2
chr11	34789732	11.21	19.82	16.24	22.32	0.89	0.88	0	0	0	0	0	0	0	0	0	8.41	Intergenic
chr11	34820403	18.69	16.22	23.08	22.32	0	0	0	0	0.85	0	0	0	1.02	0	0	15.89	Intergenic
chr11	34841955	5.61	9.91	9.4	5.36	0.89	0.88	0	0.97	0	0	0	0	0	0	0	3.74	Intergenic
chr11	34924244	9.35	9.01	8.55	8.04	0	0	0	0	0	0	0	0	0	0	0	0.93	Intergenic
chr11	34934514	36.45	33.33	28.21	28.57	85.71	58.41	92.98	79.61	72.65	78.26	42.36	51	94.9	36.97	42.48	85.05	TSS	NM_011412	Slit3	NM_011412	slit homolog 3
chr11	34934856	0.93	0	0.85	0	16.07	4.42	15.79	13.59	7.69	12.17	6.25	10	18.37	0.84	1.77	13.08	TSS	NM_011412	Slit3	NM_011412	slit homolog 3
chr11	34935507	15.89	8.11	17.95	14.29	0	0	0	0.97	0.85	0.87	0	0	0	5.04	0	15.89	TSS	NM_011412	Slit3	NM_011412	slit homolog 3
chr11	34992971	11.21	9.01	14.53	16.07	0.89	0	0	0	0	0	0	0	0	0	0	3.74	Gene body	NM_011412	Slit3	NM_011412	slit homolog 3
chr11	35027772	7.48	6.31	5.98	9.82	0	0	0	0	0	0	0	0	0	0	0	3.74	Gene body	NM_011412	Slit3	NM_011412	slit homolog 3
chr11	35060783	13.08	15.32	7.69	16.07	0.89	0	0	0	0	0	0	0	0	0	0	5.61	Intergenic
chr11	35061527	12.15	6.31	6.84	10.71	1.79	0	0.88	0.97	0.85	2.61	2.78	6	3.06	6.72	1.77	2.8	Intergenic
chr11	35091798	27.1	26.13	32.48	29.46	8.04	7.08	4.39	7.77	10.26	10.43	4.86	4	4.08	11.76	5.31	7.48	Intergenic
chr11	35160987	9.35	12.61	5.98	5.36	0	0	0	0	0	0	0	0	0	0	0	1.87	TSS	AK136017	AK136017		Mus musculus in vitro fertilized eggs cDNA, RIKEN full-length enriched library, clone:7420447L16 product:unclassifiable, full insert sequence.
chr11	35507247	13.08	17.12	11.11	16.96	2.68	1.77	2.63	2.91	4.27	0.87	3.47	7	1.02	5.88	2.65	2.8	Gene body	NM_011412	Slit3	NM_011412	slit homolog 3
chr11	35540783	6.54	8.11	10.26	9.82	0.89	1.77	0.88	0.97	2.56	1.74	9.03	4	1.02	5.88	0	2.8	Intergenic
chr11	35656548	98.13	95.5	66.67	89.29	16.07	5.31	7.89	9.71	7.69	49.57	45.83	12	11.22	31.93	0.88	19.63	Gene body	AB271907	Wwc1	NM_170779	WW, C2 and coiled-coil domain containing 1
chr11	35735941	76.64	69.37	64.1	68.75	30.36	28.32	25.44	22.33	19.66	23.48	26.39	29	23.47	38.66	23.89	12.15	Gene body	NM_170779	Wwc1	NM_170779	WW, C2 and coiled-coil domain containing 1
chr11	35776713	26.17	22.52	23.93	19.64	5.36	8.85	6.14	5.83	10.26	4.35	4.86	9	8.16	10.92	15.93	3.74	Gene body	NM_170779	Wwc1	NM_170779	WW, C2 and coiled-coil domain containing 1
chr11	39648778	9.35	12.61	8.55	8.93	3.57	0.88	0	0	4.27	4.35	6.94	4	2.04	1.68	2.65	1.87	Intergenic
chr11	41874341	37.38	38.74	29.91	41.07	14.29	22.12	14.91	19.42	14.53	28.7	14.58	10	14.29	13.45	18.58	3.74	Intergenic
chr11	43226307	38.32	31.53	45.3	39.29	23.21	15.93	13.16	15.53	16.24	13.04	17.36	15	27.55	26.05	26.55	9.35	3End	BC079904	BC079904		Mus musculus cDNA clone IMAGE:30622925.
chr11	43247310	0	0.9	0	0	14.29	21.24	22.81	3.88	18.8	10.43	3.47	1	5.1	9.24	1.77	16.82	TSS	NM_198936	Slu7	NM_198936	step II splicing factor SLU7
chr11	43887104	53.27	45.05	63.25	39.29	16.07	8.85	11.4	20.39	9.4	18.26	37.5	18	28.57	19.33	23.89	20.56	Intergenic
chr11	43981742	40.19	44.14	57.26	34.82	7.14	12.39	7.02	14.56	7.69	20	26.39	8	12.24	19.33	10.62	9.35	Intergenic
chr11	46519827	18.69	9.01	9.4	10.71	2.68	0.88	2.63	0.97	1.71	6.09	11.11	0	0	5.88	0	2.8	TSS	NM_134249	Timd2	NM_134249	T-cell immunoglobulin and mucin domain
chr11	46590473	17.76	19.82	18.8	16.07	10.71	7.08	7.02	9.71	8.55	5.22	14.58	14	12.24	15.97	22.12	3.74	Gene body	BC053400	Havcr1	NM_134248	hepatitis A virus cellular receptor 1
chr11	47192871	43.93	41.44	29.91	33.93	141.96	79.65	116.67	138.83	100	148.7	110.42	73	193.88	53.78	53.1	160.75	TSS	NM_011891	Sgcd	NM_011891	sarcoglycan, delta (dystrophin-associated
chr11	48615317	85.98	81.08	82.91	88.39	123.21	104.42	116.67	112.62	119.66	100	122.92	122	87.76	100	96.46	99.07	TSS	BC044739	Gnb2l1	NM_008143	guanine nucleotide binding protein (G protein),
chr11	49075265	16.82	13.51	17.09	10.71	2.68	4.42	4.39	4.85	5.98	13.91	14.58	7	3.06	5.04	1.77	9.35	Gene body	NM_010794	Mgat1	NM_010794	mannoside acetylglucosaminyltransferase 1
chr11	49608068	35.51	27.03	28.21	25.89	75.89	26.55	52.63	55.34	44.44	51.3	40.28	68	61.22	60.5	51.33	65.42	TSS	NM_013529	Gfpt2	NM_013529	glutamine fructose-6-phosphate transaminase 2
chr11	49660043	61.68	51.35	74.36	56.25	23.21	31.86	26.32	33.01	25.64	18.26	54.86	43	13.27	29.41	57.52	28.04	TSS	AK043169	Mapk9	NM_016961	mitogen activated protein kinase 9 isoform b
chr11	49717062	19.63	28.83	30.77	26.79	11.61	13.27	10.53	12.62	21.37	11.3	9.72	7	5.1	10.92	9.73	9.35	TSS	NM_029004	Rasgef1c	NM_029004	RasGEF domain family, member 1C
chr11	49810386	7.48	12.61	11.11	10.71	0.89	0	0	0	1.71	4.35	4.17	2	1.02	0	5.31	0.93	Intergenic
chr11	49971818	16.82	12.61	17.09	12.5	6.25	3.54	5.26	4.85	9.4	3.48	10.42	5	3.06	4.2	4.42	2.8	TSS	BC058596	Tbc1d9b	NM_029745	TBC1 domain family, member 9B
chr11	49988395	11.21	10.81	13.68	12.5	31.25	20.35	28.07	31.07	29.91	21.74	18.75	32	17.35	18.49	23.01	33.64	TSS	NM_026543	3010026O09Rik	NM_026543	hypothetical protein LOC68067
chr11	50486362	38.32	36.94	49.57	32.14	6.25	11.5	10.53	6.8	15.38	19.13	14.58	11	10.2	12.61	10.62	12.15	Gene body	AK220464	Adamts2	NM_175643	a disintegrin-like and metalloprotease
chr11	50503458	62.62	43.24	60.68	51.79	4.46	4.42	12.28	16.5	20.51	86.09	42.36	15	7.14	12.61	9.73	14.02	Gene body	AK220464	Adamts2	NM_175643	a disintegrin-like and metalloprotease
chr11	50640970	14.95	18.92	17.09	22.32	8.04	7.08	5.26	6.8	9.4	7.83	2.08	5	5.1	11.76	11.5	12.15	TSS	NM_013922	Zfp354c	NM_013922	zinc finger protein 354C
chr11	50744567	57.01	51.35	54.7	63.39	100	84.96	101.75	112.62	106.84	90.43	94.44	76	91.84	57.98	61.06	87.85	TSS	NM_013744	Zfp354b	NM_013744	zinc finger protein 354B
chr11	51043211	0	0.9	0.85	0.89	4.46	1.77	6.14	3.88	3.42	6.09	9.72	7	4.08	9.24	11.5	7.48	Intergenic
chr11	51308075	85.98	57.66	82.91	59.82	14.29	23.89	13.16	11.65	21.37	45.22	43.06	17	8.16	74.79	27.43	19.63	Gene body	NM_153393	Col23a1	NM_153393	procollagen, type XXIII, alpha 1
chr11	51470598	64.49	36.94	61.54	39.29	1.79	9.73	7.89	10.68	10.26	18.26	34.03	14	5.1	5.04	8.85	11.21	Gene body	AK086740	D930048N14Rik		Mus musculus 15 days embryo head cDNA, RIKEN full-length enriched library, clone:D930048N14 product:hypothetical protein, full insert sequence.
chr11	51638575	20.56	16.22	24.79	12.5	1.79	0	0	0.97	1.71	0.87	9.72	2	0	3.36	2.65	1.87	Gene body	AK147453	Phf15	NM_199299	PHD finger protein 15
chr11	51687979	18.69	18.92	21.37	17.86	6.25	10.62	7.02	8.74	6.84	6.96	10.42	4	5.1	7.56	10.62	6.54	Intergenic
chr11	51730260	78.5	79.28	71.79	97.32	48.21	38.05	34.21	33.98	41.88	21.74	52.08	45	24.49	35.29	52.21	33.64	Intergenic
chr11	53273966	13.08	16.22	17.95	13.39	5.36	1.77	2.63	11.65	4.27	8.7	17.36	6	7.14	4.2	5.31	4.67	Gene body	AK035462	Shroom1		Mus musculus adult male liver cDNA, RIKEN full-length enriched library, clone:1300007L22 product:RIKEN cDNA 1300007L22 gene, full insert sequence.
chr11	53300139	15.89	10.81	11.97	12.5	7.14	4.42	3.51	4.85	5.13	4.35	9.03	6	7.14	6.72	13.27	4.67	TSS	AK138371	AK138371		Mus musculus adult male hypothalamus cDNA, RIKEN full-length enriched library, clone:A230080O15 product:unclassifiable, full insert sequence.
chr11	53380924	15.89	20.72	13.68	13.39	57.14	34.51	45.61	56.31	35.04	52.17	67.36	43	47.96	10.08	20.35	54.21	TSS	AK147078	Kif3a	NM_008443	kinesin family member 3A
chr11	53454839	22.43	22.52	19.66	23.21	19.64	43.36	15.79	38.83	27.35	23.48	27.08	31	39.8	34.45	40.71	33.64	Intergenic
chr11	53517425	21.5	16.22	18.8	31.25	4.46	1.77	4.39	1.94	5.13	18.26	14.58	2	3.06	3.36	3.54	4.67	Gene body	NM_009012	Rad50	NM_009012	RAD50 homolog
chr11	53604600	29.91	14.41	17.95	25	1.79	0	0	2.91	0.85	12.17	22.92	2	1.02	3.36	0.88	2.8	Gene body	AK138811	AK138811		Mus musculus adult male hypothalamus cDNA, RIKEN full-length enriched library, clone:A230089E10 product:unclassifiable, full insert sequence.
chr11	54251744	11.21	16.22	18.8	16.07	3.57	3.54	7.02	2.91	4.27	0.87	4.17	8	2.04	10.92	9.73	10.28	TSS	NM_173753	Fnip1	NM_173753	folliculin interacting protein 1
chr11	54600958	28.97	36.94	26.5	24.11	76.79	61.06	85.96	73.79	60.68	52.17	72.92	68	68.37	36.13	42.48	100.93	TSS	NM_178626	Cdc42se2	NM_178626	CDC42 small effector 2
chr11	54679847	73.83	55.86	68.38	69.64	33.04	40.71	33.33	29.13	38.46	13.91	45.14	26	14.29	32.77	54.87	18.69	TSS	NM_008248	Hint1	NM_008248	histidine triad nucleotide binding protein 1
chr11	54846787	33.64	34.23	39.32	38.39	12.5	21.24	13.16	13.59	12.82	14.78	18.06	34	10.2	19.33	30.09	22.43	TSS	AK013026	Anxa6	NM_013472	annexin A6
chr11	55083066	17.76	19.82	14.53	15.18	6.25	7.08	6.14	7.77	10.26	8.7	14.58	9	5.1	11.76	15.93	3.74	Gene body	NM_001029988	Fat2	NM_001029988	FAT tumor suppressor homolog 2
chr11	55274946	0	0.9	0	0.89	12.5	6.19	12.28	14.56	5.98	6.96	0.69	6	3.06	2.52	0.88	26.17	TSS	NM_009720	Atox1	NM_009720	antioxidant protein 1
chr11	55414464	71.96	45.05	66.67	57.14	20.54	18.58	11.4	18.45	23.93	19.13	20.83	18	25.51	18.49	46.02	8.41	Gene body	NM_020492	Glra1	NM_020492	glycine receptor, alpha 1 subunit
chr11	56093897	27.1	39.64	26.5	33.93	14.29	15.04	9.65	9.71	9.4	12.17	16.67	16	24.49	16.81	7.96	6.54	Intergenic
chr11	57429355	0	0	0.85	0	8.93	8.85	17.54	13.59	20.51	8.7	19.44	20	14.29	25.21	8.85	14.95	Intergenic
chr11	57459232	17.76	19.82	13.68	25	11.61	13.27	15.79	13.59	14.53	18.26	13.19	19	19.39	21.01	23.01	22.43	TSS	AK143714	mFLJ00205		Mus musculus adult male colon cDNA, RIKEN full-length enriched library, clone:9030417M10 product:UDP-GALNAC:POLYPEPTIDE N-ACETYLGALACTOSAMINYLTRANSFERASE T9 (EC 2.4.1.41) homolog [Rattus norvegicus], full insert sequence.
chr11	57913718	38.32	28.83	29.06	29.46	8.04	24.78	9.65	6.8	19.66	10.43	20.83	14	7.14	10.08	14.16	9.35	Intergenic
chr11	57981887	0.93	0.9	0.85	2.68	15.18	13.27	25.44	10.68	9.4	14.78	8.33	12	4.08	1.68	3.54	20.56	TSS	NM_172558	Gemin5	NM_172558	gem (nuclear organelle) associated protein 5
chr11	58031364	0	0	0	0.89	9.82	16.81	13.16	5.83	6.84	7.83	15.97	18	15.31	8.4	14.16	14.02	Gene body	AK165347	Iigp2	NM_019440	interferon inducible GTPase 2
chr11	58115334	0	0	0	0	3.57	7.08	7.02	7.77	5.13	4.35	11.11	12	8.16	15.13	14.16	10.28	Intergenic
chr11	58791726	14.95	18.92	10.26	12.5	75.89	100.88	75.44	83.5	111.11	88.7	115.97	97	89.8	48.74	89.38	131.78	TSS	NM_053168	Trim11	NM_053168	tripartite motif protein 11
chr11	58809369	11.21	13.51	16.24	15.18	5.36	9.73	3.51	0.97	6.84	9.57	2.78	6	5.1	5.88	4.42	4.67	Gene body	NM_001003914	Obscn	NM_001003914	obscurin, cytoskeletal calmodulin and
chr11	58912046	0	0.9	0	0	25	38.94	28.95	17.48	30.77	33.04	34.72	15	33.67	34.45	23.01	18.69	Intergenic
chr11	58949163	0	0	0	0	10.71	11.5	10.53	5.83	19.66	13.04	4.17	0	4.08	11.76	2.65	20.56	Intergenic
chr11	58990084	0.93	0	0.85	0	16.07	2.65	7.02	12.62	1.71	8.7	6.25	10	14.29	5.04	7.96	21.5	Gene body	NM_080454	Gja12	NM_080454	gap junction membrane channel protein alpha 12
chr11	59264112	35.51	33.33	35.04	26.79	80.36	69.03	62.28	62.14	52.99	68.7	33.33	52	50	55.46	59.29	67.29	TSS	AK038650	Jmjd4		Mus musculus adult male olfactory brain cDNA, RIKEN full-length enriched library, clone:6430559I23 product:hypothetical jmjC domain containing protein, full insert sequence.
chr11	59661747	21.5	17.12	13.68	19.64	6.25	8.85	4.39	6.8	6.84	3.48	13.89	13	4.08	7.56	28.32	15.89	TSS	NM_134029	Nt5m	NM_134029	5',3'-nucleotidase, mitochondrial
chr11	59661908	7.48	5.41	4.27	6.25	38.39	23.89	28.07	30.1	17.95	21.74	12.5	33	25.51	0	5.31	16.82	TSS	NM_134029	Nt5m	NM_134029	5',3'-nucleotidase, mitochondrial
chr11	59838969	26.17	23.42	29.06	29.46	4.46	7.08	2.63	3.88	6.84	6.09	19.44	15	4.08	10.08	11.5	12.15	Gene body	NM_008819	Pemt	NM_008819	phosphatidylethanolamine N-methyltransferase
chr11	59881302	33.64	28.83	43.59	33.04	7.14	2.65	7.02	5.83	9.4	13.04	16.67	9	4.08	10.92	13.27	9.35	Intergenic
chr11	60545699	26.17	26.13	43.59	30.36	0.89	0.88	1.75	4.85	4.27	12.17	11.81	8	0	7.56	2.65	0.93	Gene body	NM_001009927	Smcr7	NM_001009927	Smith-Magenis syndrome chromosome region,
chr11	60655190	38.32	37.84	31.62	42.86	16.96	32.74	10.53	14.56	14.53	28.7	20.83	19	20.41	18.49	16.81	12.15	Gene body	NM_145428	Dhrs7b	NM_145428	dehydrogenase/reductase (SDR family) member 7B
chr11	61088566	13.08	7.21	12.82	13.39	1.79	3.54	1.75	0	3.42	5.22	4.17	3	1.02	2.52	2.65	2.8	Intergenic
chr11	61098788	15.89	41.44	41.88	39.29	6.25	12.39	9.65	9.71	5.98	2.61	3.47	3	2.04	4.2	4.42	0.93	Intergenic
chr11	61221801	8.41	12.61	6.84	10.71	52.68	31.86	24.56	40.78	43.59	40	33.33	32	45.92	6.72	15.04	44.86	Intergenic
chr11	61262344	31.78	22.52	41.88	28.57	0.89	7.08	5.26	0.97	7.69	9.57	9.72	7	6.12	9.24	6.19	5.61	Gene body	AB013097	Zfp179	NM_009548	zinc finger protein 179
chr11	61263031	14.02	16.22	18.8	16.96	16.96	21.24	21.05	11.65	28.21	27.83	20.14	27	34.69	32.77	28.32	29.91	Gene body	AB013097	Zfp179	NM_009548	zinc finger protein 179
chr11	61528596	11.21	15.32	11.11	12.5	33.93	26.55	30.7	25.24	29.06	40.87	13.89	15	30.61	17.65	15.93	26.17	Gene body	AK165337	Slc5a10	NM_001033227	solute carrier family 5 (sodium/glucose
chr11	61837866	0	0	0	0	19.64	28.32	19.3	19.42	19.66	14.78	19.44	10	32.65	18.49	17.7	28.04	Gene body	AK032662	AK032662		Mus musculus 10 days neonate cerebellum cDNA, RIKEN full-length enriched library, clone:6530404P05 product:SPERM ANTIGEN homolog [Homo sapiens], full insert sequence.
chr11	63517949	19.63	17.12	20.51	22.32	1.79	13.27	9.65	2.91	8.55	4.35	3.47	6	5.1	4.2	8.85	7.48	Intergenic
chr11	63733098	134.58	126.13	140.17	119.64	66.96	86.73	71.05	70.87	83.76	45.22	100.69	104	44.9	55.46	111.5	70.09	Gene body	NM_018805	Hs3st3b1	NM_018805	D-glycosaminyl 3-O-sulfotransferase-3B
chr11	63750336	73.83	65.77	64.1	66.07	86.61	93.81	92.98	95.15	105.13	89.57	97.92	78	89.8	84.87	100	70.09	Intergenic
chr11	64202625	0	0	1.71	0	12.5	6.19	7.02	11.65	4.27	15.65	11.81	8	8.16	22.69	20.35	14.02	Intergenic
chr11	64709483	46.73	31.53	36.75	35.71	28.57	24.78	24.56	27.18	27.35	17.39	38.19	39	38.78	38.66	42.48	36.45	Intergenic
chr11	66355229	56.07	48.65	47.86	43.75	25.89	31.86	28.95	31.07	26.5	53.91	35.42	36	30.61	38.66	53.1	18.69	Intergenic
chr11	66897786	39.25	63.06	64.96	40.18	28.57	28.32	25.44	28.16	32.48	24.35	57.64	50	48.98	47.9	46.9	42.06	3End	DQ021875	Myh3		Mus musculus embryonic myosin heavy chain (Myh3) mRNA, 5' UTR and partial cds, alternatively spliced.
chr11	67178249	42.06	40.54	64.1	29.46	4.46	12.39	6.14	9.71	6.84	51.3	37.5	15	11.22	23.53	7.96	15.89	TSS	AK136634	Myh13		Adult male epididymis cDNA, RIKEN full-length enriched library, clone:9230014G19 product:Extraocular myosin heavy chain homolog.
chr11	67421979	0.93	0	0	0.89	9.82	4.42	10.53	16.5	5.98	6.96	4.86	9	9.18	5.04	3.54	8.41	Gene body	AK017394	Gas7	NM_008088	growth arrest specific 7
chr11	67985799	39.25	27.03	23.08	33.04	1.79	3.54	2.63	3.88	5.13	13.04	12.5	3	3.06	11.76	10.62	2.8	Intergenic
chr11	68127568	53.27	52.25	72.65	56.25	25	19.47	23.68	29.13	33.33	29.57	55.56	39	47.96	42.86	49.56	23.36	Gene body	NM_008744	Ntn1	NM_008744	netrin 1
chr11	68715663	23.36	22.52	27.35	21.43	13.39	11.5	10.53	14.56	13.68	12.17	24.31	21	9.18	16.81	23.89	5.61	TSS	BC070397	Rpl26	NM_009080	ribosomal protein L26
chr11	68768213	20.56	26.13	22.22	20.54	44.64	36.28	35.09	45.63	46.15	37.39	20.83	27	22.45	32.77	21.24	43.93	TSS	BC116344	Arhgef15	NM_177566	Rho guanine nucleotide exchange factor (GEF) 15
chr11	68853243	31.78	24.32	27.35	28.57	14.29	17.7	15.79	14.56	16.24	13.04	23.61	27	7.14	17.65	21.24	11.21	Intergenic
chr11	68881326	74.77	75.68	69.23	73.21	33.93	38.05	42.98	36.89	35.04	30.43	43.06	51	19.39	42.02	50.44	25.23	TSS	NM_028336	Tmem107	NM_028336	hypothetical protein LOC66910 isoform 2
chr11	68935000	13.08	8.11	9.4	14.29	2.68	2.65	1.75	1.94	4.27	0.87	11.11	14	4.08	5.88	15.04	16.82	TSS	NM_033041	Hes7	NM_033041	hairy and enhancer of split 7
chr11	68936370	0	0.9	0.85	0.89	12.5	8.85	16.67	5.83	16.24	19.13	5.56	4	2.04	5.88	0.88	14.02	Gene body	NM_033041	Hes7	NM_033041	hairy and enhancer of split 7
chr11	69229363	107.48	90.09	84.62	98.21	62.5	47.79	45.61	59.22	54.7	25.22	68.06	80	21.43	61.34	84.96	66.36	TSS	NM_001017426	Jmjd3	NM_001017426	jumonji domain containing 3
chr11	69373674	37.38	40.54	39.32	40.18	68.75	70.8	72.81	87.38	61.54	86.09	54.86	81	89.8	58.82	65.49	101.87	TSS	NM_007911	Efnb3	NM_007911	ephrin B3
chr11	69393755	37.38	28.83	34.19	33.04	15.18	15.93	12.28	13.59	15.38	10.43	25.69	25	5.1	13.45	34.51	21.5	TSS	BC069868	Wdr79	NM_144824	WD repeat domain 79
chr11	69495616	84.11	88.29	80.34	83.93	141.07	123.89	133.33	140.78	128.21	86.96	128.47	133	56.12	70.59	100	105.61	TSS	AK088608	Senp3	NM_030702	SUMO/sentrin specific peptidase 3
chr11	69571550	97.2	94.59	93.16	81.25	50.89	61.95	49.12	42.72	56.41	29.57	59.03	67	38.78	58.82	88.5	42.06	TSS	NM_009089	Polr2a	NM_009089	polymerase (RNA) II (DNA directed) polypeptide
chr11	69580123	89.72	77.48	93.16	84.82	40.18	46.02	38.6	41.75	39.32	41.74	56.94	78	39.8	52.94	103.54	43.93	TSS	AK147212	Zbtb4		Zinc finger and BTB domain containing 4.
chr11	69616624	73.83	78.38	76.92	87.5	47.32	53.98	50.88	47.57	52.99	25.22	56.25	69	26.53	49.58	84.07	55.14	3End	NM_001033433	Tmem102	NM_001033433	hypothetical protein LOC380705
chr11	69650470	28.04	24.32	20.51	20.54	47.32	57.52	41.23	55.34	41.03	40.87	25.69	30	50	36.13	22.12	18.69	TSS	AK136883	Nlgn2	NM_198862	neuroligin 2
chr11	69666855	42.99	44.14	39.32	43.75	57.14	71.68	57.02	60.19	64.1	42.61	49.31	55	51.02	52.1	37.17	58.88	3End	AK167292	Tnk1		Non-receptor tyrosine-protein kinase TNK1 (EC 2.7.10.2) (Kinase of embryonic stem cells).
chr11	69809538	95.33	79.28	100	81.25	38.39	42.48	29.82	33.98	34.19	27.83	72.92	93	23.47	29.41	92.92	65.42	TSS	AY099327	Phf23	NM_030064	PHD finger protein 23
chr11	69834501	57.01	46.85	52.14	45.54	25.89	31.86	32.46	24.27	29.06	16.52	30.56	32	23.47	30.25	41.59	14.95	Gene body	BC014807	Dlg4	NM_007864	postsynaptic density protein 95
chr11	70053090	90.65	81.08	71.79	82.14	40.18	41.59	32.46	32.04	36.75	19.13	62.5	96	12.24	37.82	67.26	51.4	TSS	BC012258	D11Bwg0434e		Uncharacterized potential DNA-binding protein C17orf49 homolog.
chr11	70138635	18.69	21.62	18.8	20.54	6.25	7.08	7.89	6.8	5.98	13.04	8.33	11	10.2	3.36	8.85	5.61	TSS	NM_145684	Alox12e	NM_145684	arachidonate lipoxygenase, epidermal
chr11	70783337	7.48	5.41	5.13	5.36	6.25	10.62	9.65	1.94	3.42	2.61	11.11	13	12.24	14.29	13.27	18.69	TSS	AK139738	Nup88		Mus musculus mRNA for 88kDa nucleoporin protein (Nup88 gene).
chr11	71564691	14.95	12.61	11.11	11.61	35.71	28.32	21.93	31.07	33.33	26.96	31.94	21	48.98	0	23.01	57.94	TSS	AK049137	BC030477		ES cells cDNA, RIKEN full-length enriched library, clone:C330006H24 product:inferred: Similar to KIAA0789 gene product (Homo sapiens), full insert sequence.
chr11	71849209	6.54	6.31	5.13	4.46	13.39	7.08	14.91	18.45	2.56	18.26	13.89	16	20.41	15.97	17.7	11.21	TSS	NM_053245	Aipl1	NM_053245	aryl hydrocarbon receptor-interacting
chr11	72224728	0.93	0.9	0	0	12.5	9.73	19.3	7.77	23.08	16.52	6.25	5	2.04	17.65	0.88	6.54	TSS	NM_177776	Smtnl2	NM_177776	smoothelin-like 2
chr11	72225182	0.93	0	0	0	14.29	4.42	8.77	6.8	3.42	10.43	7.64	11	9.18	0	0	21.5	TSS	NM_177776	Smtnl2	NM_177776	smoothelin-like 2
chr11	72250305	26.17	17.12	20.51	11.61	0	0	0.88	1.94	1.71	2.61	2.78	6	1.02	2.52	2.65	0	TSS	BC055837	Ggt6		Ggt6 protein.
chr11	72250784	17.76	7.21	7.69	10.71	0.89	2.65	1.75	0	3.42	2.61	4.17	0	0	0	0.88	0	TSS	BC055837	Ggt6		Ggt6 protein.
chr11	72365194	51.4	34.23	51.28	50.89	11.61	15.04	14.04	16.5	22.22	21.74	21.53	22	15.31	24.37	48.67	15.89	TSS	NM_029932	Spns3	NM_029932	spinster homolog 3
chr11	72608931	14.02	10.81	11.97	11.61	28.57	20.35	44.74	39.81	23.08	33.04	23.61	28	31.63	31.93	20.35	23.36	TSS	BC086682	RP23-327G1.2		Novel protein.
chr11	72812463	22.43	24.32	22.22	23.21	39.29	38.94	37.72	35.92	31.62	38.26	27.78	35	34.69	43.7	30.97	54.21	TSS	NM_008771	P2rx1	NM_008771	purinergic receptor P2X1
chr11	72863030	70.09	86.49	70.94	108.04	85.71	84.96	102.63	91.26	102.56	100.87	75	57	65.31	66.39	54.87	57.94	TSS	NM_025818	1200014J11Rik	NM_025818	ELG protein
chr11	72984771	85.98	109.01	103.42	83.04	33.93	39.82	32.46	54.37	44.44	42.61	72.92	67	32.65	49.58	86.73	36.45	Gene body	NM_033321	P2rx5	NM_033321	purinergic receptor P2X5
chr11	73042427	57.01	55.86	68.38	86.61	16.07	13.27	18.42	14.56	26.5	60	105.56	7	10.2	42.86	16.81	27.1	Intergenic
chr11	74197777	18.69	22.52	11.11	14.29	2.68	5.31	1.75	1.94	2.56	8.7	5.56	4	5.1	4.2	2.65	4.67	Gene body	AK147290	mKIAA1039		Mus musculus adult male hypothalamus cDNA, RIKEN full-length enriched library, clone:A230066N08 product:GTPase activating RANGAP domain-like 4, full insert sequence.
chr11	74636904	11.21	14.41	19.66	11.61	0.89	0.88	1.75	1.94	0.85	3.48	13.19	6	0	0.84	0.88	1.87	Intergenic
chr11	74980641	76.64	86.49	69.23	67.86	151.79	129.2	147.37	142.72	124.79	111.3	121.53	107	121.43	89.92	88.5	115.89	TSS	NM_001098203	Hic1	NM_001098203	hypermethylated in cancer 1 isoform 2
chr11	74981665	4.67	5.41	4.27	7.14	14.29	14.16	21.93	15.53	12.82	19.13	6.94	7	12.24	14.29	2.65	15.89	TSS	NM_001098203	Hic1	NM_001098203	hypermethylated in cancer 1 isoform 2
chr11	74984013	55.14	58.56	51.28	54.46	96.43	92.92	97.37	99.03	96.58	95.65	77.78	127	71.43	36.13	68.14	124.3	TSS	NM_010430	Hic1	NM_010430	hypermethylated in cancer 1 isoform 1
chr11	75024057	0	0	0	0	23.21	7.08	10.53	24.27	20.51	8.7	14.58	17	24.49	3.36	9.73	35.51	Gene body	NM_177708	Rtn4rl1	NM_177708	reticulon 4 receptor-like 1
chr11	75245041	34.58	18.92	34.19	24.11	5.36	3.54	3.51	9.71	5.13	27.83	23.61	6	7.14	6.72	10.62	5.61	3End	NM_008878	Serpinf2	NM_008878	serine (or cysteine) proteinase inhibitor, clade
chr11	75245236	11.21	9.01	5.98	9.82	1.79	0.88	1.75	0.97	1.71	5.22	8.33	2	3.06	2.52	0	2.8	3End	NM_008878	Serpinf2	NM_008878	serine (or cysteine) proteinase inhibitor, clade
chr11	75255284	72.9	62.16	50.43	65.18	14.29	26.55	18.42	22.33	24.79	20.87	38.89	30	9.18	20.17	53.98	23.36	Gene body	AK172019	Wdr81		WD repeat protein 81.
chr11	75281279	18.69	15.32	21.37	20.54	6.25	7.96	6.14	9.71	6.84	6.09	16.67	11	5.1	2.52	15.04	2.8	TSS	NM_027249	2010305C02Rik	NM_027249	hypothetical protein LOC380712
chr11	75308015	48.6	44.14	47.86	61.61	20.54	23.89	22.81	27.18	29.91	18.26	33.33	29	9.18	27.73	36.28	26.17	3End	AK041017	Prpf8	NM_138659	pre-mRNA processing factor 8
chr11	75379600	25.23	31.53	25.64	21.43	12.5	8.85	10.53	6.8	11.11	13.04	12.5	11	8.16	15.13	14.16	11.21	TSS	BC050243	slc43a2		Mus musculus slc43a2 mRNA for L-type amino acid transporter 4, complete cds.
chr11	76031154	0	0	0	0	12.5	13.27	20.18	9.71	9.4	20.87	9.03	4	3.06	9.24	4.42	17.76	TSS	NM_021294	Dbil5	NM_021294	diazepam binding inhibitor-like 5
chr11	76082314	10.28	9.01	7.69	8.04	16.07	15.04	18.42	16.5	23.08	10.43	12.5	7	17.35	15.13	15.04	15.89	Gene body	NM_008750	Nxn	NM_008750	nucleoredoxin
chr11	76249576	37.38	27.03	35.9	30.36	1.79	4.42	0.88	0.97	5.98	12.17	20.83	3	2.04	5.88	3.54	2.8	Gene body	NM_198894	Abr	NM_198894	active BCR-related isoform 2
chr11	76308169	8.41	4.5	4.27	3.57	36.61	15.93	50.88	37.86	26.5	51.3	42.36	31	45.92	6.72	11.5	66.36	TSS	AK153615	Abr	NM_198894	active BCR-related isoform 2
chr11	76459702	28.04	28.83	26.5	25	11.61	15.04	9.65	6.8	22.22	13.91	15.97	15	15.31	15.97	15.93	14.02	Intergenic
chr11	76759379	43.93	44.14	40.17	35.71	88.39	59.29	74.56	85.44	87.18	81.74	71.53	74	73.47	68.07	44.25	85.05	TSS	NM_178645	Blmh	NM_178645	bleomycin hydrolase
chr11	77744305	30.84	29.73	27.35	25	10.71	15.04	13.16	14.56	15.38	14.78	28.47	22	20.41	9.24	21.24	16.82	TSS	NM_021286	Sez6	NM_021286	seizure related gene 6
chr11	77845696	2.8	2.7	1.71	1.79	17.86	12.39	20.18	26.21	8.55	18.26	26.39	19	11.22	8.4	11.5	40.19	TSS	NM_183286	Dhrs13	NM_183286	dehydrogenase/reductase (SDR family) member 13
chr11	77851726	90.65	105.41	98.29	100.89	124.11	142.48	132.46	148.54	147.01	122.61	127.78	146	95.92	73.11	97.35	125.23	TSS	NM_001040403	Flot2	NM_001040403	flotillin 2 isoform 1
chr11	77893657	34.58	34.23	39.32	43.75	12.5	21.24	20.18	17.48	16.24	20.87	13.19	26	9.18	34.45	45.13	14.95	TSS	AF190731	Eral1		GTPase ERA-S.
chr11	78156884	17.76	18.92	23.08	27.68	5.36	6.19	4.39	5.83	9.4	9.57	8.33	5	4.08	5.04	7.96	4.67	TSS	NM_011676	Unc119	NM_011676	UNC-119 homolog
chr11	78325653	35.51	38.74	32.48	38.39	25	20.35	23.68	30.1	27.35	16.52	32.64	22	20.41	21.85	22.12	17.76	TSS	NM_199199	AI316787	NM_199199	hypothetical protein LOC195040
chr11	78349630	17.76	20.72	25.64	18.75	3.57	5.31	6.14	6.8	7.69	2.61	3.47	14	6.12	13.45	23.01	14.95	TSS	AK168386	Tnfaip1	NM_009395	tumor necrosis factor, alpha-induced protein 1
chr11	79017182	23.36	27.93	29.06	23.21	5.36	16.81	14.91	4.85	7.69	14.78	20.83	11	11.22	15.97	14.16	10.28	Intergenic
chr11	79042719	18.69	10.81	11.11	12.5	0	0.88	0	5.83	1.71	3.48	9.72	1	1.02	0	0	1.87	Intergenic
chr11	79100967	13.08	12.61	17.09	16.07	2.68	7.08	5.26	6.8	11.97	5.22	10.42	7	8.16	5.88	5.31	7.48	Intergenic
chr11	79153847	31.78	32.43	29.91	35.71	49.11	48.67	42.98	51.46	46.15	56.52	49.31	53	41.84	49.58	27.43	41.12	TSS	NM_010897	Nf1	NM_010897	neurofibromin
chr11	79537534	33.64	17.12	29.06	28.57	2.68	1.77	3.51	5.83	7.69	13.04	16.67	5	2.04	5.88	3.54	6.54	Intergenic
chr11	79639547	86.92	72.97	94.87	82.14	43.75	33.63	39.47	44.66	48.72	101.74	73.61	33	44.9	42.02	30.97	40.19	Intergenic
chr11	79984216	92.52	71.17	82.05	74.11	32.14	34.51	29.82	21.36	27.35	21.74	45.83	53	15.31	28.57	62.83	23.36	Gene body	AK053136	AK053136		Mus musculus 0 day neonate lung cDNA, RIKEN full-length enriched library, clone:E030012C15 product:unclassifiable, full insert sequence.
chr11	81331639	14.02	18.92	16.24	16.96	6.25	6.19	6.14	7.77	9.4	5.22	4.86	4	12.24	11.76	13.27	6.54	Intergenic
chr11	81890819	36.45	36.04	30.77	38.39	17.86	16.81	10.53	13.59	17.09	14.78	31.94	28	35.71	23.53	20.35	17.76	Intergenic
chr11	82498381	12.15	17.12	12.82	10.71	2.68	3.54	1.75	0	5.13	3.48	11.81	4	4.08	4.2	2.65	1.87	Intergenic
chr11	82667705	12.15	12.61	10.26	5.36	2.68	0	2.63	2.91	3.42	4.35	5.56	2	1.02	0.84	0.88	0	Gene body	NM_001007465	Rffl	NM_001007465	ring finger and FYVE like domain containing
chr11	83556695	21.5	20.72	23.08	16.07	8.93	7.08	9.65	11.65	7.69	10.43	31.25	14	5.1	10.08	6.19	10.28	Intergenic
chr11	83634257	14.95	9.91	13.68	10.71	3.57	1.77	2.63	2.91	2.56	10.43	5.56	2	5.1	8.4	2.65	1.87	Intergenic
chr11	83696820	24.3	30.63	23.08	27.68	10.71	12.39	19.3	16.5	21.37	12.17	19.44	12	12.24	12.61	12.39	8.41	Gene body	AK019258	Hnf1b	NM_009330	transcription factor 2
chr11	83942820	5.61	4.5	2.56	3.57	36.61	16.81	25.44	18.45	15.38	19.13	15.28	15	16.33	3.36	5.31	29.91	TSS	NM_172562	Tada2l	NM_172562	transcriptional adaptor 2 (ADA2 homolog,
chr11	84244134	28.04	19.82	19.66	22.32	3.57	4.42	8.77	4.85	11.97	6.96	10.42	9	7.14	5.04	7.08	3.74	Gene body	NM_019816	Aatf	NM_019816	apoptosis antagonizing transcription factor
chr11	84260116	16.82	15.32	14.53	18.75	0.89	9.73	7.02	6.8	10.26	6.09	4.17	6	8.16	6.72	6.19	5.61	Intergenic
chr11	84337704	110.28	102.7	102.56	101.79	121.43	152.21	113.16	142.72	132.48	108.7	102.08	132	141.84	126.89	130.97	130.84	TSS	NM_008498	Lhx1	NM_008498	LIM homeobox protein 1
chr11	84514705	32.71	38.74	60.68	32.14	25	23.01	21.93	22.33	25.64	26.96	44.44	33	36.73	36.13	34.51	29.91	Intergenic
chr11	84683071	16.82	19.82	14.53	16.96	33.04	37.17	40.35	34.95	30.77	28.7	25	46	25.51	36.13	19.47	42.99	TSS	BC139772	Ggnbp2	NM_153144	zinc finger protein 403
chr11	85124674	8.41	10.81	11.97	7.14	3.57	6.19	3.51	5.83	3.42	2.61	5.56	3	3.06	1.68	1.77	2.8	TSS	NM_016910	Ppm1d	NM_016910	protein phosphatase 1D magnesium-dependent,
chr11	85547377	16.82	15.32	18.8	17.86	6.25	9.73	8.77	9.71	7.69	9.57	11.81	6	13.27	19.33	9.73	9.35	Intergenic
chr11	85587844	17.76	20.72	22.22	13.39	8.04	1.77	5.26	7.77	8.55	13.91	13.19	2	3.06	4.2	4.42	5.61	Intergenic
chr11	85626077	42.06	43.24	40.17	39.29	25	25.66	16.67	15.53	23.08	40	23.61	22	19.39	21.85	26.55	20.56	TSS	AK187115	Bcas3		Mus musculus 10 days embryo whole body cDNA, RIKEN full-length enriched library, clone:2610028P08 product:inferred: Mus musculus K20D4 (K20D4) mRNA, complete cds, full insert sequence.
chr11	85626282	34.58	49.55	47.86	41.96	15.18	25.66	18.42	14.56	20.51	20	15.28	14	19.39	20.17	20.35	15.89	TSS	AK187115	Bcas3		Mus musculus 10 days embryo whole body cDNA, RIKEN full-length enriched library, clone:2610028P08 product:inferred: Mus musculus K20D4 (K20D4) mRNA, complete cds, full insert sequence.
chr11	85626435	78.5	72.07	90.6	80.36	24.11	37.17	38.6	33.01	54.7	100	65.97	54	38.78	45.38	37.17	39.25	TSS	AK187115	Bcas3		Mus musculus 10 days embryo whole body cDNA, RIKEN full-length enriched library, clone:2610028P08 product:inferred: Mus musculus K20D4 (K20D4) mRNA, complete cds, full insert sequence.
chr11	85738808	29.91	33.33	38.46	33.04	48.21	55.75	48.25	46.6	63.25	53.04	55.56	52	73.47	57.98	65.49	71.96	Intergenic
chr11	85790321	17.76	17.12	19.66	20.54	16.96	32.74	18.42	24.27	21.37	27.83	21.53	27	33.67	29.41	29.2	27.1	Intergenic
chr11	86806673	10.28	9.91	7.69	8.93	19.64	20.35	15.79	19.42	22.22	14.78	18.75	20	14.29	15.97	20.35	27.1	TSS	NM_001005341	Ypel2	NM_001005341	yippee-like 2
chr11	86868254	8.41	9.91	9.4	9.82	1.79	1.77	1.75	2.91	3.42	2.61	6.25	2	6.12	5.88	5.31	0.93	Gene body	NM_025638	Gdpd1	NM_025638	glycerophosphodiester phosphodiesterase domain
chr11	86900174	42.06	50.45	55.56	52.68	23.21	24.78	21.05	24.27	26.5	27.83	20.14	32	19.39	42.02	60.18	13.08	TSS	NM_024262	1200011M11Rik	NM_024262	hypothetical protein LOC74133
chr11	86923336	5.61	5.41	6.84	3.57	49.11	4.42	54.39	33.98	16.24	26.09	23.61	31	30.61	22.69	13.27	33.64	TSS	BC052151	1110001A07Rik	NM_025377	hypothetical protein LOC66140
chr11	87172371	0.93	0	0	0	13.39	14.16	18.42	10.68	16.24	26.96	3.47	5	5.1	9.24	0.88	14.02	TSS	NM_177167	Ppm1e	NM_177167	protein phosphatase 1E (PP2C domain containing)
chr11	87402986	14.02	12.61	11.11	16.07	6.25	3.54	4.39	6.8	5.13	7.83	7.64	10	2.04	9.24	10.62	1.87	Gene body	AK133933	40790		8 days embryo whole body cDNA, RIKEN full-length enriched library, clone:5730535G19 product:septin 4, full insert sequence.
chr11	87409456	64.49	71.17	77.78	64.29	29.46	43.36	28.07	29.13	35.04	28.7	47.22	44	42.86	31.09	78.76	38.32	Gene body	AK146641	Mtmr4	NM_133215	myotubularin related protein 4
chr11	87414058	26.17	22.52	33.33	30.36	5.36	4.42	1.75	10.68	5.13	18.26	30.56	7	6.12	10.08	5.31	5.61	Gene body	AK146641	Mtmr4	NM_133215	myotubularin related protein 4
chr11	87496774	43.93	47.75	57.26	57.14	16.96	20.35	18.42	16.5	26.5	15.65	22.22	19	20.41	36.13	44.25	12.15	Intergenic
chr11	87799839	16.82	14.41	17.95	21.43	3.57	18.58	12.28	6.8	13.68	5.22	10.42	6	6.12	5.88	8.85	4.67	TSS	NM_026556	Dynll2	NM_026556	dynein light chain LC8-type 2
chr11	87882551	46.73	39.64	40.17	45.54	19.64	23.01	20.18	27.18	20.51	27.83	30.56	36	13.27	26.89	51.33	25.23	TSS	NM_016686	Vezf1	NM_016686	vascular endothelial zinc finger 1
chr11	88111308	24.3	25.23	44.44	30.36	6.25	3.54	7.02	5.83	6.84	15.65	21.53	4	8.16	20.17	6.19	1.87	Intergenic
chr11	88181429	12.15	14.41	12.82	13.39	22.32	22.12	19.3	17.48	21.37	27.83	25.69	17	23.47	39.5	30.97	20.56	TSS	AK007122	msi2		Mus musculus msi2 mRNA for RNA-binding protein Musashi2-S, complete cds.
chr11	88332069	11.21	19.82	15.38	16.07	4.46	3.54	3.51	5.83	4.27	13.91	17.36	4	5.1	1.68	7.08	6.54	Gene body	AK031365	Msi2		13 days embryo male testis cDNA, RIKEN full-length enriched library, clone:6030413L18 product:Musashi homolog 2 (Drosophila), full insert sequence.
chr11	88550214	25.23	17.12	35.04	19.64	4.46	1.77	7.02	8.74	4.27	15.65	14.58	2	3.06	5.04	6.19	5.61	Gene body	BC109368	Msi2h		Musashi homolog 2 (Drosophila).
chr11	88714880	17.76	10.81	15.38	12.5	1.79	1.77	0.88	2.91	1.71	8.7	13.19	8	0	5.04	2.65	2.8	TSS	U95145	Akap1		Mus musculus adult male diencephalon cDNA, RIKEN full-length enriched library, clone:9330153C20 product:A kinase anchor protein, full insert sequence.
chr11	89163070	0.93	0.9	0.85	0.89	16.96	15.93	15.79	12.62	11.11	17.39	24.31	16	30.61	7.56	16.81	27.1	TSS	NM_008711	Nog	NM_008711	noggin
chr11	89163107	13.08	19.82	22.22	16.07	51.79	57.52	28.95	28.16	75.21	63.48	43.75	62	60.2	39.5	58.41	74.77	TSS	NM_008711	Nog	NM_008711	noggin
chr11	89163706	0	0	0.85	0.89	16.96	7.08	18.42	11.65	9.4	13.04	6.25	11	28.57	5.04	1.77	53.27	TSS	NM_008711	Nog	NM_008711	noggin
chr11	90202523	42.06	26.13	30.77	20.54	1.79	1.77	1.75	4.85	5.13	6.09	15.28	11	2.04	10.92	8.85	4.67	Gene body	BC057693	Hlf	NM_172563	hepatic leukemia factor
chr11	90207271	48.6	32.43	60.68	53.57	5.36	5.31	4.39	10.68	12.82	20.87	22.92	19	3.06	10.92	20.35	6.54	Gene body	BC057693	Hlf	NM_172563	hepatic leukemia factor
chr11	93748149	88.79	79.28	78.63	89.29	129.46	146.9	142.98	124.27	147.01	135.65	87.5	127	123.47	120.17	115.93	96.26	TSS	AK141155	Mbtd1		Mbtd1 protein (Mbt domain containing 1).
chr11	93816172	13.08	17.12	16.24	13.39	7.14	7.96	5.26	4.85	6.84	5.22	10.42	19	8.16	10.92	12.39	10.28	TSS	NM_001077529	Nme2	NM_001077529	nucleoside-diphosphate kinase 2
chr11	93829321	3.74	1.8	1.71	1.79	44.64	17.7	53.51	33.01	21.37	21.74	4.17	32	26.53	12.61	8.85	14.95	TSS	NM_008704	Nme1	NM_008704	nucleoside-diphosphate kinase 1
chr11	93829328	9.35	8.11	5.13	7.14	47.32	23.89	48.25	30.1	25.64	27.83	20.83	27	17.35	13.45	14.16	78.5	TSS	NM_008704	Nme1	NM_008704	nucleoside-diphosphate kinase 1
chr11	93859449	65.42	60.36	72.65	80.36	21.43	30.97	33.33	28.16	28.21	26.09	42.36	32	16.33	71.43	65.49	23.36	Gene body	AB047782	Spag9	NM_027569	sperm associated antigen 9 isoform 1
chr11	93996686	16.82	6.31	14.53	11.61	0	0.88	0	0	0	2.61	13.19	1	0	3.36	0.88	0	Intergenic
chr11	93999351	55.14	60.36	52.14	42.86	10.71	9.73	19.3	19.42	14.53	15.65	37.5	25	8.16	27.73	18.58	9.35	Intergenic
chr11	94072863	15.89	13.51	16.24	17.86	6.25	8.85	8.77	6.8	6.84	6.09	11.11	10	4.08	5.88	13.27	7.48	TSS	NM_009427	Tob1	NM_009427	transducer of ErbB-2.1
chr11	94101186	14.95	10.81	14.53	8.93	2.68	2.65	3.51	3.88	1.71	3.48	7.64	1	3.06	5.88	3.54	1.87	Gene body	NM_181819	Wfikkn2	NM_181819	WAP, follistatin/kazal, immunoglobulin, kunitz
chr11	94138457	67.29	73.87	74.36	76.79	106.25	101.77	103.51	94.17	102.56	102.61	112.5	88	97.96	73.95	64.6	85.98	Intergenic
chr11	94232075	36.45	41.44	53.85	53.57	13.39	16.81	14.04	18.45	15.38	11.3	21.53	14	16.33	14.29	39.82	10.28	Gene body	NM_029600	Abcc3	NM_029600	ATP-binding cassette, sub-family C (CFTR/MRP),
chr11	94276922	33.64	30.63	38.46	31.25	21.43	19.47	21.05	26.21	26.5	31.3	45.83	40	42.86	47.06	45.13	37.38	TSS	AF227530	Cacna1g		Mus musculus T calcium channel alpha1G subunit +34+35 splice variant (Cacna1g) mRNA, partial cds.
chr11	94335678	0	0	0	0	16.07	6.19	14.04	11.65	16.24	17.39	4.86	3	7.14	9.24	0	33.64	TSS	NM_009783	Cacna1g	NM_009783	calcium channel, voltage-dependent, T type,
chr11	94352515	47.66	42.34	49.57	44.64	72.32	64.6	67.54	70.87	58.12	69.57	67.36	94	108.16	38.66	75.22	111.21	Gene body	AK158031	Epn3	NM_027984	epsin 3
chr11	94979652	14.95	9.91	12.82	10.71	4.46	4.42	3.51	1.94	3.42	4.35	2.78	4	3.06	10.92	7.96	3.74	TSS	NM_010055	Dlx3	NM_010055	distal-less homeobox 3
chr11	95007389	0	0.9	0	0	13.39	7.08	20.18	7.77	20.51	20	8.33	4	8.16	13.45	4.42	20.56	TSS	NM_007867	Dlx4	NM_007867	distal-less homeobox 4
chr11	95085076	36.45	30.63	35.9	33.93	18.75	20.35	18.42	18.45	21.37	25.22	22.22	20	13.27	17.65	28.32	15.89	Intergenic
chr11	95448938	5.61	8.11	9.4	7.14	26.79	26.55	54.39	32.04	27.35	39.13	15.28	32	36.73	21.01	7.96	33.64	TSS	NM_033217	Ngfr	NM_033217	nerve growth factor receptor (TNFR superfamily,
chr11	95692588	52.34	51.35	59.83	62.5	106.25	95.58	128.07	85.44	106.84	72.17	88.19	83	110.2	83.19	52.21	71.96	Gene body	NM_153104	Phospho1	NM_153104	phosphatase, orphan 1
chr11	95721033	0	0.9	0	0	5.36	7.08	10.53	5.83	17.09	8.7	1.39	4	2.04	2.52	0.88	0.93	TSS	AK133925	AK133925		Mus musculus 0 day neonate head cDNA, RIKEN full-length enriched library, clone:4833417C18 product:unclassifiable, full insert sequence.
chr11	96133481	21.5	27.93	25.64	33.04	71.43	54.87	74.56	52.43	79.49	67.83	54.86	55	75.51	12.61	29.2	71.03	TSS	BC103573	Hoxb9		Hoxb9 protein.
chr11	96135145	16.82	15.32	17.95	16.96	0	11.5	8.77	7.77	7.69	8.7	0	5	7.14	4.2	4.42	4.67	Gene body	BC103573	Hoxb9		Hoxb9 protein.
chr11	96155381	52.34	45.05	50.43	50.89	26.79	29.2	26.32	19.42	21.37	20.87	38.19	28	24.49	49.58	69.91	23.36	Gene body	AK002860	AK002860		Mus musculus adult male kidney cDNA, RIKEN full-length enriched library, clone:0610040B09 product:unclassifiable, full insert sequence.
chr11	96177407	26.17	20.72	27.35	27.68	11.61	15.04	10.53	13.59	13.68	15.65	21.53	13	13.27	19.33	25.66	13.08	TSS	NM_010459	Hoxb4	NM_010459	homeo box B4
chr11	96637161	34.58	20.72	36.75	35.71	7.14	4.42	7.89	7.77	11.11	13.04	13.19	8	6.12	3.36	7.96	7.48	TSS	NM_028965	Snx11	NM_028965	sorting nexin 11
chr11	96650617	0	0	0.85	0	18.75	20.35	10.53	5.83	2.56	12.17	6.25	38	15.31	9.24	23.01	23.36	TSS	AK017608	Cbx1	NM_007622	chromobox homolog 1
chr11	96685537	0.93	0	0	0	22.32	4.42	23.68	20.39	10.26	16.52	0.69	5	5.1	5.04	0.88	11.21	TSS	AK148471	Nfe2l1	NM_008686	nuclear factor, erythroid derived 2,-like 1
chr11	96925080	14.95	20.72	17.95	16.07	6.25	5.31	4.39	4.85	5.98	6.09	8.33	11	7.14	12.61	16.81	8.41	Intergenic
chr11	97141128	44.86	45.05	60.68	50.89	21.43	27.43	22.81	22.33	27.35	21.74	28.47	23	16.33	19.33	31.86	14.95	TSS	NM_008942	Npepps	NM_008942	aminopeptidase puromycin sensitive
chr11	97195946	19.63	11.71	11.11	8.93	1.79	0.88	1.75	2.91	2.56	16.52	15.28	6	4.08	10.92	3.54	8.41	Gene body	NM_001081220	Gpr179	NM_001081220	G protein-coupled receptor 179
chr11	97385796	13.08	13.51	16.24	14.29	7.14	7.96	9.65	9.71	11.11	14.78	10.42	4	3.06	5.88	4.42	2.8	Gene body	NM_018873	P140	NM_018873	Snap-25-interacting protein
chr11	97398540	85.98	84.68	78.63	87.5	111.61	108.85	127.19	103.88	111.97	130.43	87.5	123	115.31	36.13	81.42	97.2	Gene body	NM_018873	P140	NM_018873	Snap-25-interacting protein
chr11	97439580	23.36	22.52	22.22	19.64	27.68	39.82	32.46	27.18	29.91	36.52	34.72	44	46.94	32.77	41.59	35.51	Intergenic
chr11	97450711	28.97	30.63	30.77	28.57	44.64	49.56	49.12	46.6	55.56	35.65	41.67	28	55.1	25.21	37.17	55.14	Intergenic
chr11	97490374	15.89	14.41	11.11	15.18	17.86	13.27	12.28	10.68	11.97	8.7	21.53	32	26.53	31.93	30.97	38.32	TSS	NM_175332	E130012A19Rik	NM_175332	hypothetical protein LOC103551
chr11	98064723	76.64	75.68	65.81	84.82	44.64	36.28	42.11	33.98	38.46	38.26	34.03	43	33.67	46.22	52.21	28.04	TSS	AK129237	mKIAA0904		Mus musculus 10 day old male pancreas cDNA, RIKEN full-length enriched library, clone:1810022J16 product:hypothetical Serine-rich region containing protein, full insert sequence.
chr11	98307686	69.16	75.68	79.49	66.07	33.93	38.05	28.07	41.75	35.9	28.7	59.03	47	23.47	28.57	63.72	39.25	TSS	NM_010346	Grb7	NM_010346	growth factor receptor bound protein 7
chr11	98319491	2.8	1.8	2.56	3.57	28.57	11.5	19.3	25.24	11.97	26.09	9.72	16	28.57	3.36	4.42	13.08	3End	NM_010346	Grb7	NM_010346	growth factor receptor bound protein 7
chr11	98767131	12.15	9.91	9.4	14.29	2.68	1.77	3.51	2.91	3.42	7.83	2.08	5	4.08	5.04	7.08	1.87	TSS	NM_001025779	Cdc6	NM_001025779	cell division cycle 6 homolog isoform b
chr11	98778826	9.35	8.11	10.26	8.93	21.43	15.04	18.42	18.45	17.95	10.43	9.03	11	5.1	12.61	6.19	12.15	Gene body	NM_001025779	Cdc6	NM_001025779	cell division cycle 6 homolog isoform b
chr11	98797289	35.51	34.23	41.88	45.54	15.18	16.81	13.16	17.48	18.8	10.43	13.89	19	10.2	15.13	38.94	7.48	TSS	BC040383	Rara	NM_009024	retinoic acid receptor, alpha
chr11	98812770	43.93	44.14	57.26	53.57	22.32	30.09	21.93	22.33	26.5	15.65	36.11	43	12.24	13.45	44.25	31.78	Intergenic
chr11	98827952	14.95	18.02	19.66	14.29	7.14	6.19	5.26	5.83	6.84	6.09	9.72	13	6.12	8.4	7.96	6.54	TSS	AK153644	Rara	NM_009024	retinoic acid receptor, alpha
chr11	98843513	56.07	49.55	38.46	38.39	152.68	100	107.02	155.34	98.29	113.91	98.61	103	154.08	32.77	62.83	119.63	TSS	NM_178596	Gjc1	NM_178596	gap junction membrane channel protein chi 1
chr11	98929561	9.35	5.41	11.97	9.82	0	0.88	0.88	0.97	1.71	2.61	4.86	1	1.02	0.84	0.88	0.93	Gene body	NM_172564	Tns4	NM_172564	tensin 4
chr11	99279253	10.28	12.61	11.11	13.39	16.07	15.93	9.65	24.27	8.55	15.65	22.92	28	30.61	27.73	40.71	27.1	TSS	AK158612	AK158612		Mus musculus 10 days neonate cortex cDNA, RIKEN full-length enriched library, clone:A830036E02 product:unclassifiable, full insert sequence.
chr11	99844114	38.32	46.85	46.15	38.39	19.64	27.43	21.05	26.21	23.08	23.48	27.08	33	38.78	25.21	38.05	20.56	Intergenic
chr11	100275922	0.93	0	0	0.89	9.82	11.5	14.04	5.83	14.53	19.13	6.94	4	2.04	22.69	0.88	23.36	TSS	NM_176830	1110036O03Rik	NM_176830	synaptonemal complex protein SC65
chr11	100366565	25.23	27.93	31.62	33.93	7.14	7.08	4.39	8.74	5.13	26.96	26.39	9	5.1	13.45	4.42	3.74	Gene body	AK135528	Acly	NM_134037	ATP citrate lyase
chr11	100473235	14.95	19.82	16.24	20.54	9.82	8.85	7.02	6.8	8.55	4.35	11.81	12	6.12	8.4	10.62	12.15	Gene body	NM_019795	Dnajc7	NM_019795	DnaJ (Hsp40) homolog, subfamily C, member 7
chr11	100553833	25.23	29.73	23.08	29.46	14.29	9.73	11.4	2.91	14.53	13.04	15.97	9	13.27	14.29	12.39	14.02	3End	NM_030150	Dhx58	NM_030150	RNA helicase LGP2
chr11	100554092	37.38	28.83	35.04	30.36	14.29	15.93	18.42	17.48	17.95	20	25	26	24.49	19.33	29.2	18.69	3End	NM_030150	Dhx58	NM_030150	RNA helicase LGP2
chr11	100652512	38.32	34.23	35.9	44.64	16.96	17.7	14.91	12.62	13.68	13.91	27.08	30	5.1	12.61	38.05	19.63	Gene body	Z48539	Stat5b	NM_011489	signal transducer and activator of transcription
chr11	100820459	4.67	5.41	5.13	4.46	5.36	19.47	7.02	7.77	13.68	10.43	15.97	11	16.33	11.76	11.5	16.82	Gene body	NM_008986	Ptrf	NM_008986	polymerase I and transcript release factor
chr11	101190209	14.02	12.61	13.68	8.93	2.68	2.65	3.51	3.88	2.56	5.22	10.42	7	2.04	10.08	15.04	7.48	Gene body	NM_178932	Aoc2	NM_178932	amine oxidase, copper containing 2
chr11	101638494	10.28	11.71	13.68	8.93	4.46	3.54	4.39	2.91	2.56	1.74	15.97	2	3.06	5.04	7.08	3.74	Gene body	AK158497	Etv4		Visual cortex cDNA, RIKEN full-length enriched library, clone:K230002O06 product:ets variant gene 4 (E1A enhancer binding protein, E1AF), full insert sequence. (Fragment).
chr11	101646198	28.97	21.62	11.97	28.57	41.07	56.64	49.12	35.92	43.59	36.52	22.22	26	22.45	22.69	22.12	19.63	TSS	AK158497	Etv4		Visual cortex cDNA, RIKEN full-length enriched library, clone:K230002O06 product:ets variant gene 4 (E1A enhancer binding protein, E1AF), full insert sequence. (Fragment).
chr11	101991449	30.84	22.52	19.66	19.64	5.36	10.62	7.02	6.8	7.69	10.43	8.33	11	11.22	21.01	15.04	3.74	Intergenic
chr11	102137838	3.74	3.6	3.42	5.36	37.5	16.81	26.32	39.81	20.51	20	13.19	16	30.61	7.56	7.96	22.43	Gene body	NM_148953	Asb16	NM_148953	ankyrin repeat and SOCS box-containing 16
chr11	102225170	16.82	20.72	24.79	24.11	9.82	15.93	5.26	5.83	7.69	11.3	13.19	7	8.16	9.24	10.62	8.41	TSS	NM_011403	Slc4a1	NM_011403	solute carrier family 4 (anion exchanger),
chr11	102260584	102.8	109.01	98.29	95.54	187.5	177.88	166.67	177.67	137.61	146.96	152.78	166	163.27	94.12	96.46	167.29	TSS	AK002856	Rundc3a	NM_016759	RUN domain containing 3A
chr11	102275433	39.25	28.83	30.77	35.71	11.61	13.27	8.77	11.65	13.68	10.43	28.47	13	6.12	13.45	18.58	10.28	Intergenic
chr11	102309288	62.62	59.46	77.78	66.96	33.93	38.94	29.82	28.16	36.75	20	41.67	50	29.59	33.61	42.48	19.63	TSS	NM_199200	BC025575	NM_199200	hypothetical protein LOC217219
chr11	102327460	52.34	42.34	58.12	42.86	23.21	34.51	21.93	33.98	33.33	25.22	17.36	23	18.37	19.33	28.32	23.36	TSS	AK048700	Itga2b	NM_010575	integrin alpha 2b
chr11	102402853	10.28	8.11	6.84	6.25	0	0	0.88	0.97	0	0	6.94	2	0	0.84	0	1.87	Gene body	AK135410	AK135410		Mus musculus 12 days embryo female mullerian duct includes surrounding region cDNA, RIKEN full-length enriched library, clone:6820415O06 product:hypothetical protein, full insert sequence.
chr11	102465821	4.67	7.21	3.42	4.46	33.04	23.01	26.32	31.07	21.37	40	10.42	14	45.92	5.04	4.42	53.27	Intergenic
chr11	102466967	34.58	33.33	26.5	27.68	74.11	61.95	71.93	51.46	57.26	76.52	48.61	62	73.47	10.92	37.17	63.55	Intergenic
chr11	102467761	15.89	15.32	13.68	17.86	2.68	9.73	11.4	1.94	11.11	2.61	2.78	6	5.1	5.88	7.96	3.74	Intergenic
chr11	102657574	28.04	22.52	28.21	21.43	11.61	8.85	10.53	14.56	5.98	11.3	24.31	7	12.24	7.56	11.5	9.35	Intergenic
chr11	102911617	34.58	30.63	32.48	33.04	19.64	20.35	20.18	25.24	18.8	23.48	31.25	36	22.45	21.01	23.01	23.36	Gene body	NM_008707	Nmt1	NM_008707	N-myristoyltransferase 1
chr11	102967313	11.21	6.31	9.4	11.61	3.57	1.77	1.75	1.94	0.85	8.7	6.94	3	5.1	0.84	1.77	2.8	TSS	AK218656	Acbd4		Mus musculus adult male small intestine cDNA, RIKEN full-length enriched library, clone:2010012F14 product:hypothetical protein, full insert sequence.
chr11	103186221	29.91	25.23	29.91	25	8.93	14.16	9.65	13.59	13.68	6.09	8.33	13	9.18	15.13	27.43	13.08	Intergenic
chr11	103460714	5.61	11.71	10.26	6.25	0	3.54	0.88	0	2.56	2.61	0	1	1.02	0	0	0	Gene body	NM_001033434	Gm884	NM_001033434	hypothetical protein LOC380730
chr11	103547002	55.14	46.85	67.52	56.25	16.07	23.01	13.16	15.53	18.8	20.87	36.81	14	15.31	25.21	33.63	17.76	Gene body	NM_019650	Gosr2	NM_019650	golgi SNAP receptor complex member 2
chr11	103596412	26.17	22.52	23.08	24.11	7.14	9.73	8.77	7.77	9.4	6.09	7.64	7	3.06	7.56	12.39	6.54	Gene body	NM_011719	Wnt9b	NM_011719	wingless-type MMTV integration site 9B
chr11	103653066	20.56	21.62	19.66	25	11.61	9.73	7.89	10.68	8.55	19.13	20.83	14	22.45	15.13	20.35	5.61	Gene body	NM_009521	Wnt3	NM_009521	wingless-related MMTV integration site 3
chr11	104061648	0.93	0.9	0	0	2.68	7.96	3.51	10.68	11.97	11.3	8.33	7	9.18	8.4	20.35	7.48	Intergenic
chr11	104098668	54.21	44.14	57.26	61.61	19.64	14.16	17.54	12.62	16.24	26.96	30.56	22	8.16	17.65	34.51	10.28	Gene body	M18775	Mapt	NM_010838	microtubule-associated protein tau isoform b
chr11	104303466	4.67	3.6	2.56	2.68	13.39	8.85	13.16	12.62	8.55	6.09	6.94	25	12.24	0.84	1.77	15.89	TSS	NM_001081045	1700081L11Rik	NM_001081045	hypothetical protein LOC76719
chr11	104633792	24.3	27.03	22.22	24.11	16.07	13.27	13.16	16.5	15.38	13.91	21.53	7	15.31	18.49	30.97	17.76	Intergenic
chr11	105005694	14.95	18.02	16.24	13.39	5.36	7.96	11.4	8.74	6.84	6.09	6.25	7	5.1	5.04	7.08	4.67	Intergenic
chr11	105043424	8.41	8.11	6.84	6.25	10.71	12.39	14.91	10.68	7.69	6.96	12.5	15	16.33	19.33	17.7	20.56	TSS	AK089925	Tlk2		Serine/threonine-protein kinase tousled-like 2 (EC 2.7.11.1) (Tousled- like kinase 2).
chr11	105104948	6.54	8.11	6.84	8.04	0	0	0.88	0.97	0	7.83	6.94	0	0	1.68	0	0	Gene body	AK014829	Tlk2	NM_011903	tousled-like kinase 2
chr11	105836117	40.19	30.63	36.75	60.71	9.82	8.85	3.51	8.74	3.42	20.87	21.53	11	8.16	7.56	13.27	15.89	TSS	NM_009598	Ace	NM_009598	angiotensin I converting enzyme
chr11	105927539	6.54	7.21	7.69	8.04	14.29	17.7	17.54	14.56	17.95	10.43	11.11	26	7.14	5.88	11.5	20.56	TSS	NM_027346	Ccdc44	NM_027346	coiled-coil domain containing 44
chr11	106063335	19.63	22.52	23.08	20.54	39.29	43.36	40.35	52.43	37.61	26.96	26.39	30	25.51	19.33	16.81	33.64	TSS	BC052063	asp4		Mus musculus asp4 mRNA for adipocyte-specific protein 4, complete cds.
chr11	106504417	21.5	17.12	26.5	18.75	4.46	5.31	6.14	6.8	9.4	13.91	11.11	4	6.12	13.45	12.39	3.74	Intergenic
chr11	106521485	11.21	18.02	13.68	12.5	4.46	6.19	3.51	2.91	4.27	1.74	7.64	10	5.1	5.88	7.96	8.41	3End	AK037551	Pecam1	NM_008816	platelet/endothelial cell adhesion molecule 1
chr11	106539276	82.24	68.47	87.18	56.25	35.71	37.17	33.33	44.66	28.21	65.22	45.83	35	19.39	26.89	31.86	27.1	Gene body	AK037551	Pecam1	NM_008816	platelet/endothelial cell adhesion molecule 1
chr11	106686069	46.73	47.75	51.28	41.96	22.32	38.05	15.79	39.81	31.62	57.39	45.83	28	24.49	28.57	30.97	28.97	Gene body	NM_025481	Smurf2	NM_025481	SMAD specific E3 ubiquitin protein ligase 2
chr11	107253983	35.51	42.34	38.46	33.93	10.71	9.73	10.53	18.45	10.26	18.26	41.67	11	17.35	12.61	12.39	14.02	Intergenic
chr11	107270113	21.5	27.93	28.21	20.54	2.68	4.42	5.26	1.94	5.13	8.7	11.11	9	4.08	8.4	11.5	4.67	Intergenic
chr11	107289542	70.09	57.66	86.32	61.61	13.39	15.93	9.65	10.68	21.37	30.43	30.56	19	9.18	32.77	27.43	14.02	TSS	AK146139	AK146139		Mus musculus TIB-55 BB88 cDNA, RIKEN full-length enriched library, clone:I730011L10 product:unclassifiable, full insert sequence.
chr11	107331195	4.67	3.6	4.27	4.46	16.07	14.16	17.54	11.65	11.97	13.04	5.56	14	12.24	3.36	4.42	5.61	TSS	NM_145823	Pitpnc1	NM_145823	phosphatidylinositol transfer protein,
chr11	107655232	2.8	1.8	2.56	1.79	11.61	12.39	16.67	11.65	17.95	13.91	5.56	9	9.18	16.81	3.54	37.38	TSS	AK048292	AK048292		Mus musculus 16 days embryo head cDNA, RIKEN full-length enriched library, clone:C130046O09 product:unclassifiable, full insert sequence.
chr11	108001529	27.1	19.82	20.51	20.54	7.14	7.96	7.02	6.8	6.84	12.17	8.33	3	10.2	5.88	12.39	4.67	Intergenic
chr11	108129319	22.43	20.72	24.79	23.21	7.14	11.5	7.02	21.36	6.84	0.87	8.33	10	10.2	10.08	10.62	8.41	Gene body	NM_011101	Prkca	NM_011101	protein kinase C, alpha
chr11	108204584	0	0.9	0	0	10.71	6.19	23.68	13.59	29.91	18.26	3.47	5	7.14	17.65	2.65	15.89	TSS	NM_011101	Prkca	NM_011101	protein kinase C, alpha
chr11	108204706	5.61	7.21	3.42	4.46	22.32	16.81	20.18	23.3	29.06	15.65	18.75	15	9.18	19.33	11.5	29.91	TSS	NM_011101	Prkca	NM_011101	protein kinase C, alpha
chr11	109224405	0	0.9	0	0.89	9.82	6.19	14.91	12.62	5.98	13.04	4.86	2	11.22	3.36	0.88	6.54	TSS	NM_010303	Gna13	NM_010303	guanine nucleotide binding protein, alpha 13
chr11	109333945	94.39	78.38	76.07	77.68	116.96	115.93	114.91	134.95	94.02	115.65	120.14	152	122.45	119.33	144.25	128.97	TSS	NM_134038	Slc16a6	NM_134038	solute carrier family 16, member 6 isoform b
chr11	109340082	16.82	15.32	14.53	13.39	2.68	5.31	4.39	4.85	4.27	2.61	13.19	10	3.06	3.36	7.08	8.41	Intergenic
chr11	109361995	26.17	34.23	28.21	32.14	10.71	11.5	9.65	11.65	11.11	12.17	26.39	14	15.31	17.65	8.85	10.28	Gene body	NM_028710	Arsg	NM_028710	Arylsulfatase G
chr11	109406977	35.51	30.63	33.33	33.93	21.43	21.24	20.18	19.42	24.79	20	21.53	19	23.47	27.73	36.28	14.02	TSS	BC039629	Arsg	NM_028710	Arylsulfatase G
chr11	109484050	62.62	66.67	66.67	66.07	77.68	120.35	77.19	103.88	82.91	84.35	78.47	90	88.78	79.83	89.38	93.46	Intergenic
chr11	109582709	32.71	27.93	29.06	32.14	17.86	19.47	21.93	22.33	21.37	15.65	26.39	32	5.1	19.33	30.97	20.56	TSS	AK142932	BC029169	NM_153782	hypothetical protein LOC208659
chr11	110926895	10.28	9.01	8.55	10.71	35.71	27.43	39.47	41.75	35.9	39.13	33.33	28	26.53	6.72	15.93	29.91	TSS	NM_008425	Kcnj2	NM_008425	potassium inwardly-rectifying channel J2
chr11	111604546	33.64	31.53	35.9	28.57	20.54	17.7	16.67	21.36	17.95	16.52	48.61	36	42.86	31.09	38.94	25.23	Intergenic
chr11	111900248	10.28	11.71	12.82	8.04	2.68	3.54	4.39	2.91	4.27	7.83	9.03	3	4.08	10.08	7.96	0.93	Intergenic
chr11	112518927	7.48	9.01	7.69	13.39	1.79	1.77	2.63	0.97	0.85	1.74	4.86	2	4.08	4.2	2.65	2.8	Intergenic
chr11	112582555	5.61	8.11	5.98	4.46	13.39	11.5	25.44	30.1	23.93	13.91	4.17	28	15.31	15.13	19.47	20.56	Intergenic
chr11	112924576	23.36	12.61	22.22	20.54	3.57	3.54	2.63	5.83	5.13	18.26	20.14	4	4.08	5.04	5.31	4.67	Gene body	AK031204	AK031204		Mus musculus 10 days embryo whole body cDNA, RIKEN full-length enriched library, clone:2610035D17 product:unclassifiable, full insert sequence.
chr11	112962817	23.36	27.93	25.64	23.21	14.29	12.39	14.04	10.68	13.68	13.04	24.31	19	28.57	14.29	11.5	10.28	Gene body	AK031204	AK031204		Mus musculus 10 days embryo whole body cDNA, RIKEN full-length enriched library, clone:2610035D17 product:unclassifiable, full insert sequence.
chr11	112993482	28.97	23.42	22.22	23.21	7.14	17.7	10.53	10.68	9.4	10.43	19.44	13	10.2	10.08	14.16	11.21	Gene body	AK011682	AK011682		Mus musculus 10 days embryo whole body cDNA, RIKEN full-length enriched library, clone:2610035D17 product:unclassifiable, full insert sequence.
chr11	113007174	64.49	46.85	65.81	50	15.18	10.62	11.4	25.24	25.64	50.43	58.33	29	15.31	18.49	23.01	23.36	Gene body	AK011682	AK011682		Mus musculus 10 days embryo whole body cDNA, RIKEN full-length enriched library, clone:2610035D17 product:unclassifiable, full insert sequence.
chr11	113047614	12.15	9.01	11.11	13.39	6.25	6.19	6.14	6.8	1.71	3.48	4.86	4	5.1	3.36	3.54	5.61	Intergenic
chr11	113219847	0.93	0	0.85	0.89	5.36	6.19	4.39	6.8	4.27	6.09	2.78	4	10.2	9.24	7.96	8.41	Gene body	AK165545	Slc39a11	NM_027216	solute carrier family 39 (metal ion
chr11	113480277	51.4	46.85	51.28	44.64	59.82	94.69	65.79	68.93	65.81	92.17	57.64	78	67.35	89.08	76.99	87.85	TSS	X68951	Sstr2	NM_009217	somatostatin receptor 2 isoform B
chr11	113511364	1.87	2.7	2.56	2.68	9.82	14.16	10.53	6.8	7.69	7.83	6.94	8	14.29	3.36	7.96	12.15	TSS	AK165545	Slc39a11	NM_027216	solute carrier family 39 (metal ion
chr11	113583870	30.84	26.13	29.06	37.5	20.54	26.55	13.16	20.39	29.91	14.78	21.53	13	11.22	10.08	15.93	12.15	Gene body	AK139389	D11Wsu47e	NM_177777	hypothetical protein LOC276852
chr11	114485456	22.43	18.92	19.66	24.11	8.04	9.73	6.14	8.74	9.4	10.43	17.36	9	20.41	10.92	17.7	6.54	Intergenic
chr11	114519226	19.63	18.02	23.08	10.71	11.61	10.62	9.65	8.74	7.69	17.39	13.19	18	19.39	21.85	19.47	14.95	Intergenic
chr11	114537864	0.93	2.7	1.71	1.79	10.71	7.96	17.54	12.62	6.84	6.96	4.17	13	8.16	5.88	1.77	5.61	TSS	NM_053273	Ttyh2	NM_053273	tweety 2
chr11	114642599	17.76	19.82	20.51	17.86	28.57	28.32	29.82	28.16	35.9	34.78	33.33	34	41.84	35.29	27.43	21.5	Gene body	NM_001102615	Kif19a	NM_001102615	kinesin family member 19A
chr11	114647894	0	0.9	0.85	0.89	17.86	8.85	8.77	30.1	7.69	20.87	18.06	20	21.43	1.68	2.65	22.43	Gene body	NM_001102615	Kif19a	NM_001102615	kinesin family member 19A
chr11	114738811	28.04	30.63	29.06	33.04	13.39	24.78	7.02	8.74	14.53	9.57	18.75	17	11.22	14.29	13.27	13.08	Intergenic
chr11	115019710	39.25	37.84	34.19	39.29	45.54	49.56	38.6	67.96	19.66	42.61	70.83	68	54.08	64.71	70.8	76.64	Gene body	AK045995	Rab37		Adult male corpora quadrigemina cDNA, RIKEN full-length enriched library, clone:B230362J20 product:RAB37, member of RAS oncogene family, full insert sequence.
chr11	115038722	4.67	1.8	2.56	2.68	21.43	20.35	14.91	22.33	14.53	7.83	20.83	24	19.39	10.92	13.27	22.43	TSS	AK216315	Slc9a3r1		Mus musculus 13 days embryo stomach cDNA, RIKEN full-length enriched library, clone:D530016O21 product:solute carrier family 9 (sodium/hydrogen exchanger), isoform 3 regulator 1, full insert sequence.
chr11	115255189	4.67	4.5	7.69	4.46	29.46	18.58	15.79	26.21	23.08	12.17	13.89	22	18.37	7.56	14.16	22.43	Gene body	NM_001080929	Cdr2l	NM_001080929	cerebellar degeneration-related protein 2-like
chr11	115265250	53.27	53.15	50.43	54.46	81.25	76.99	78.95	70.87	70.94	63.48	47.92	58	35.71	47.06	56.64	61.68	TSS	NM_026729	Ict1	NM_026729	immature colon carcinoma transcript 1
chr11	115309679	34.58	31.53	30.77	37.5	13.39	10.62	12.28	15.53	8.55	8.7	15.97	19	4.08	7.56	13.27	14.95	3End	NM_001033775	4933422H20Rik	NM_001033775	hypothetical protein LOC432613
chr11	115336992	24.3	18.02	23.08	21.43	8.93	10.62	14.04	10.68	9.4	10.43	18.75	15	3.06	12.61	22.12	6.54	TSS	NM_177778	Armc7	NM_177778	armadillo repeat containing 7
chr11	115359554	11.21	14.41	10.26	12.5	3.57	3.54	3.51	1.94	1.71	4.35	6.94	3	0	6.72	3.54	2.8	Gene body	NM_008258	Hn1	NM_008258	hematological and neurological expressed
chr11	115465678	0	0	0	0	18.75	17.7	35.09	17.48	29.91	12.17	27.08	26	19.39	5.88	7.08	28.97	TSS	NM_025305	Mrps7	NM_025305	mitchondrial ribosomal protein S7
chr11	115692523	41.12	51.35	50.43	52.68	25.89	30.09	27.19	20.39	27.35	16.52	33.33	37	10.2	16.81	38.94	19.63	Gene body	NM_145438	Llgl2	NM_145438	lethal giant larvae homolog 2
chr11	115719530	14.02	12.61	9.4	16.07	69.64	36.28	71.93	57.28	37.61	63.48	38.89	43	69.39	18.49	16.81	29.91	3End	NM_145438	Llgl2	NM_145438	lethal giant larvae homolog 2
chr11	115761552	51.4	54.95	52.14	44.64	75.89	70.8	82.46	75.73	90.6	106.09	78.47	96	118.37	81.51	107.08	115.89	TSS	BC065414	2210020M01Rik	NM_183259	hypothetical protein LOC66528
chr11	115885453	0	0	0	0	11.61	9.73	20.18	5.83	8.55	17.39	5.56	0	1.02	5.88	0	14.95	TSS	NM_008211	H3f3b	NM_008211	H3 histone, family 3B
chr11	116070924	11.21	20.72	17.09	15.18	2.68	0.88	1.75	0.97	2.56	3.48	10.42	5	1.02	3.36	1.77	0.93	Gene body	BC027639	2310004N24Rik		Adult male tongue cDNA, RIKEN full-length enriched library, clone:2310004N24 product:hypothetical protein, full insert sequence (CRL-1722 L5178Y-R cDNA, RIKEN full-length enriched library, clone:I730043L06 product:hypothetical protein, full insert sequenc
chr11	116338604	26.17	17.12	27.35	17.86	4.46	0	3.51	4.85	3.42	26.09	16.67	3	2.04	4.2	1.77	0.93	Gene body	AK011290	Prpsap1		Phosphoribosyl pyrophosphate synthetase-associated protein 1 (PRPP synthetase-associated protein 1) (39 kDa phosphoribosypyrophosphate synthetase-associated protein) (PAP39).
chr11	116393538	26.17	24.32	26.5	26.79	11.61	12.39	8.77	10.68	10.26	16.52	9.03	17	16.33	20.17	34.51	5.61	TSS	AK160900	Sphk1	NM_025367	sphingosine kinase 1 isoform 2
chr11	116482058	50.47	44.14	59.83	62.5	3.57	4.42	5.26	5.83	9.4	28.7	43.06	18	4.08	7.56	14.16	9.35	Gene body	AK042365	Rhbdf2	NM_172572	rhomboid-like protein 6
chr11	116509349	34.58	30.63	32.48	32.14	47.32	44.25	49.12	47.57	49.57	32.17	38.19	34	36.73	40.34	36.28	43.93	Gene body	NM_030206	Cygb	NM_030206	cytoglobin
chr11	116704089	51.4	47.75	54.7	51.79	25	28.32	31.58	27.18	23.93	15.65	34.03	41	16.33	53.78	46.9	39.25	TSS	BC117737	mKIAA0585		Mus musculus apoptotic cell clearance receptor PtdSerR mRNA, complete cds.
chr11	116738573	24.3	33.33	42.74	41.07	5.36	11.5	8.77	9.71	11.97	18.26	13.19	11	5.1	10.92	23.01	4.67	3End	BC016209	ET		Mus musculus clone ET8 ET putative translation product (ET) mRNA, partial cds.
chr11	117061488	53.27	65.77	55.56	61.61	86.61	88.5	103.51	89.32	100.85	92.17	95.14	85	130.61	47.06	59.29	114.95	TSS	AK141312	40795		Septin-9 (SL3-3 integration site 1 protein).
chr11	117146244	52.34	48.65	73.5	65.18	16.96	21.24	15.79	26.21	16.24	29.57	42.36	29	15.31	31.09	48.67	21.5	Gene body	AK122415	40795		Septin-9 (SL3-3 integration site 1 protein).
chr11	117175932	37.38	25.23	36.75	26.79	6.25	7.08	12.28	8.74	8.55	40.87	42.36	14	5.1	17.65	15.04	9.35	Intergenic
chr11	117194499	71.96	75.68	73.5	77.68	22.32	29.2	18.42	24.27	30.77	29.57	57.64	37	12.24	30.25	40.71	12.15	TSS	AK031757	40795	NM_017380	septin 9
chr11	117256020	49.53	52.25	49.57	46.43	75	85.84	81.58	72.82	80.34	81.74	68.75	92	83.67	73.95	58.41	127.1	Intergenic
chr11	117710675	0.93	0.9	0	1.79	45.54	12.39	32.46	40.78	25.64	24.35	12.5	10	10.2	9.24	0.88	56.07	TSS	NM_001012273	Birc5	NM_001012273	baculoviral IAP repeat-containing 5 isoform 3
chr11	117831317	48.6	45.95	41.03	44.64	28.57	25.66	32.46	29.13	30.77	19.13	30.56	35	21.43	25.21	37.17	28.97	TSS	NM_007707	Socs3	NM_007707	suppressor of cytokine signaling 3
chr11	118071694	8.41	9.91	14.53	12.5	0.89	1.77	1.75	2.91	0.85	1.74	4.17	2	0	4.2	3.54	4.67	Gene body	AK158216	Pscd1	NM_011180	pleckstrin homology, Sec7 and coiled-coil
chr11	118216875	0.93	1.8	2.56	1.79	16.96	22.12	18.42	19.42	26.5	19.13	19.44	22	19.39	17.65	14.16	14.02	TSS	NM_011594	Timp2	NM_011594	tissue inhibitor of metalloproteinase 2
chr11	118255490	22.43	26.13	23.93	24.11	3.57	6.19	7.02	8.74	9.4	31.3	13.19	4	5.1	3.36	3.54	7.48	Gene body	NM_011150	Lgals3bp	NM_011150	lectin, galactoside-binding, soluble, 3 binding
chr11	118320358	36.45	35.14	33.33	35.71	15.18	16.81	18.42	18.45	18.8	11.3	9.03	16	16.33	19.33	34.51	11.21	Intergenic
chr11	118414640	31.78	32.43	33.33	30.36	56.25	50.44	39.47	45.63	45.3	57.39	39.58	53	44.9	59.66	55.75	51.4	Gene body	NM_001024931	D11Bwg0517e	NM_001024931	DNA segment, Chr 11, Brigham & Women's Genetics
chr11	118587816	22.43	21.62	23.08	25	5.36	5.31	7.02	8.74	5.98	14.78	18.06	7	7.14	10.08	1.77	7.48	Gene body	NM_001024931	D11Bwg0517e	NM_001024931	DNA segment, Chr 11, Brigham & Women's Genetics
chr11	118588050	13.08	13.51	11.11	9.82	0.89	2.65	1.75	1.94	1.71	6.96	6.25	3	3.06	2.52	2.65	1.87	Gene body	NM_001024931	D11Bwg0517e	NM_001024931	DNA segment, Chr 11, Brigham & Women's Genetics
chr11	118588624	56.07	45.95	55.56	67.86	12.5	17.7	16.67	19.42	20.51	14.78	16.67	25	9.18	20.17	19.47	7.48	Gene body	NM_001024931	D11Bwg0517e	NM_001024931	DNA segment, Chr 11, Brigham & Women's Genetics
chr11	118770155	2.8	4.5	4.27	2.68	45.54	18.58	28.07	49.51	27.35	36.52	31.94	26	78.57	3.36	3.54	61.68	TSS	NM_001024931	D11Bwg0517e	NM_001024931	DNA segment, Chr 11, Brigham & Women's Genetics
chr11	118880805	7.48	6.31	8.55	7.14	8.93	14.16	15.79	16.5	8.55	13.04	14.58	18	15.31	18.49	21.24	14.02	Intergenic
chr11	118909402	50.47	40.54	47.01	47.32	23.21	28.32	21.93	25.24	29.91	10.43	36.11	27	28.57	16.81	55.75	24.3	Intergenic
chr11	118914141	20.56	35.14	21.37	20.54	33.93	38.05	30.7	36.89	34.19	26.09	22.22	18	18.37	22.69	18.58	22.43	Intergenic
chr11	118920222	2.8	5.41	3.42	1.79	27.68	13.27	30.7	23.3	21.37	20.87	15.97	20	21.43	12.61	10.62	42.06	Intergenic
chr11	118951893	50.47	44.14	52.99	42.86	25.89	31.86	27.19	29.13	27.35	24.35	32.64	54	16.33	23.53	51.33	39.25	Intergenic
chr11	118988941	49.53	35.14	36.75	42.86	19.64	16.81	14.91	22.33	12.82	16.52	29.86	24	11.22	11.76	20.35	12.15	Intergenic
chr11	118991487	37.38	28.83	28.21	33.93	12.5	15.93	13.16	18.45	17.95	14.78	22.92	16	2.04	7.56	15.93	13.08	Intergenic
chr11	119086453	55.14	47.75	52.99	48.21	3.57	0.88	2.63	4.85	2.56	39.13	28.47	6	1.02	10.08	3.54	0.93	Gene body	NM_172443	Tbc1d16	NM_172443	TBC1 domain family, member 16
chr11	119090377	28.97	34.23	35.9	38.39	18.75	20.35	14.91	13.59	15.38	11.3	13.19	19	14.29	27.73	30.09	14.02	TSS	AK054172	Ccdc40	NM_175430	coiled-coil domain containing 40
chr11	119161551	22.43	24.32	18.8	17.86	10.71	18.58	10.53	3.88	13.68	6.96	9.03	9	6.12	5.88	7.96	7.48	TSS	NM_138669	Eif4a3	NM_138669	eukaryotic translation initiation factor 4A,
chr11	119420611	10.28	14.41	14.53	11.61	3.57	6.19	3.51	3.88	5.98	11.3	10.42	5	5.1	2.52	7.96	3.74	Intergenic
chr11	119424638	39.25	36.04	35.04	34.82	14.29	14.16	20.18	12.62	17.09	36.52	29.17	15	16.33	30.25	18.58	20.56	Intergenic
chr11	119493846	13.08	10.81	12.82	7.14	3.57	3.54	1.75	3.88	3.42	8.7	3.47	2	3.06	0.84	2.65	0.93	Intergenic
chr11	119782196	18.69	17.12	18.8	16.07	8.93	8.85	18.42	16.5	12.82	4.35	15.28	11	9.18	10.92	11.5	10.28	3End	NM_001085498	Chmp6	NM_001085498	chromatin modifying protein 6
chr11	119871574	12.15	10.81	6.84	6.25	0	0.88	0	1.94	0	3.48	9.72	3	2.04	0.84	5.31	0.93	Gene body	AK147239	Aatk		Serine/threonine-protein kinase LMTK1 (EC 2.7.11.1) (Lemur tyrosine kinase 1) (Apoptosis-associated tyrosine kinase) (AATYK) (Brain apoptosis-associated tyrosine kinase).
chr11	119960363	40.19	49.55	57.26	48.21	26.79	26.55	17.54	24.27	22.22	17.39	25.69	35	28.57	15.97	39.82	25.23	TSS	AK007756	AK007756		Mus musculus 10 day old male pancreas cDNA, RIKEN full-length enriched library, clone:1810043H04 product:unclassifiable, full insert sequence.
chr11	119960815	81.31	72.07	85.47	99.11	34.82	46.02	34.21	30.1	41.03	28.7	34.72	48	34.69	44.54	75.22	46.73	TSS	AK007756	AK007756		Mus musculus 10 day old male pancreas cDNA, RIKEN full-length enriched library, clone:1810043H04 product:unclassifiable, full insert sequence.
chr11	120096290	6.54	13.51	1.71	2.68	9.82	10.62	9.65	4.85	13.68	7.83	0.69	3	1.02	1.68	1.77	0.93	TSS	AB257855	Bahcc1		CDNA, RIKEN full-length enriched library, clone:M5C1002D21 product:B930044J06 protein, full insert sequence.
chr11	120098005	0.93	0.9	0.85	1.79	17.86	11.5	14.04	8.74	5.98	11.3	6.25	7	2.04	10.08	1.77	29.91	TSS	AB257855	Bahcc1		CDNA, RIKEN full-length enriched library, clone:M5C1002D21 product:B930044J06 protein, full insert sequence.
chr11	120102571	12.15	9.01	11.11	12.5	5.36	3.54	2.63	3.88	4.27	7.83	4.86	9	2.04	2.52	7.08	5.61	Gene body	AB257855	Bahcc1		CDNA, RIKEN full-length enriched library, clone:M5C1002D21 product:B930044J06 protein, full insert sequence.
chr11	120131088	12.15	16.22	14.53	20.54	3.57	3.54	0.88	1.94	2.56	6.09	13.19	9	4.08	3.36	7.96	3.74	Intergenic
chr11	120239694	0.93	0	0.85	0.89	15.18	4.42	15.79	11.65	6.84	10.43	13.19	8	12.24	4.2	0	15.89	TSS	NM_027980	2310003H01Rik	NM_027980	hypothetical protein LOC71885
chr11	120377273	17.76	14.41	12.82	17.86	2.68	3.54	6.14	3.88	4.27	3.48	5.56	10	3.06	5.04	11.5	6.54	Intergenic
chr11	120392855	65.42	64.86	82.91	59.82	25	39.82	21.05	23.3	23.08	22.61	30.56	36	14.29	34.45	40.71	24.3	TSS	BC012718	Gcgr		Mus musculus adult male liver cDNA, RIKEN full-length enriched library, clone:1300003O18 product:glucagon receptor, full insert sequence.
chr11	120521499	2.8	5.41	2.56	1.79	27.68	12.39	30.7	21.36	17.09	19.13	18.06	13	20.41	0	5.31	23.36	TSS	NM_175263	Notum	NM_175263	notum pectinacetylesterase homolog
chr11	120582150	71.03	74.77	63.25	66.07	113.39	107.08	108.77	134.95	96.58	84.35	124.31	119	115.31	51.26	74.34	128.97	Gene body	NM_153545	Lrrc45	NM_153545	leucine rich repeat containing 45
chr11	120657572	53.27	53.15	65.81	48.21	20.54	25.66	24.56	20.39	31.62	20.87	31.94	40	17.35	23.53	38.05	24.3	TSS	AK147967	Dus1l	NM_026824	PP3111 protein
chr11	120819461	28.04	40.54	48.72	40.18	8.93	23.89	6.14	21.36	14.53	26.96	18.75	7	9.18	10.08	11.5	11.21	3End	AK140317	Csnk1d	NM_139059	casein kinase 1, delta isoform 1
chr11	120855971	19.63	24.32	26.5	25.89	3.57	1.77	5.26	5.83	4.27	12.17	4.17	3	1.02	3.36	5.31	0.93	Intergenic
chr11	121301394	11.21	17.12	14.53	12.5	1.79	5.31	1.75	5.83	6.84	1.74	5.56	4	4.08	4.2	3.54	2.8	Gene body	NM_001038699	Fn3k	NM_001038699	fructosamine 3 kinase isoform b
chr11	121405469	27.1	21.62	32.48	33.04	3.57	7.08	6.14	5.83	9.4	8.7	17.36	8	7.14	8.4	15.04	12.15	Intergenic
chr11	121413556	17.76	27.03	25.64	21.43	8.04	5.31	5.26	7.77	4.27	13.04	17.36	4	3.06	9.24	3.54	14.95	Intergenic
chr11	121691402	8.41	9.01	8.55	7.14	16.96	13.27	18.42	14.56	17.09	17.39	15.28	17	13.27	7.56	24.78	7.48	TSS	AB235902	Ptchd3		RNDEu-3.
chr12	3011798	17.76	17.12	13.68	19.64	3.57	5.31	7.89	4.85	5.98	2.61	5.56	1	9.18	9.24	6.19	5.61	Intergenic
chr12	3576831	11.21	16.22	18.8	14.29	3.57	5.31	2.63	5.83	4.27	4.35	3.47	11	7.14	3.36	4.42	2.8	Gene body	BC030924	Dtnb	NM_007886	dystrobrevin, beta
chr12	3810672	16.82	16.22	16.24	18.75	20.54	33.63	25.44	33.01	31.62	23.48	27.78	28	33.67	27.73	34.51	37.38	Gene body	AK147642	Dnmt3a	NM_007872	DNA methyltransferase 3A isoform 1
chr12	4419010	21.5	22.52	25.64	35.71	8.04	7.96	4.39	8.74	10.26	10.43	11.81	9	3.06	8.4	12.39	4.67	Intergenic
chr12	4419078	37.38	24.32	23.08	21.43	3.57	1.77	2.63	0.97	4.27	6.96	15.97	3	1.02	6.72	7.96	1.87	Intergenic
chr12	4534005	16.82	15.32	20.51	20.54	8.93	14.16	8.77	12.62	9.4	12.17	11.11	6	8.16	6.72	8.85	4.67	Intergenic
chr12	4851760	15.89	7.21	13.68	10.71	0.89	0	0.88	2.91	0.85	4.35	7.64	1	2.04	1.68	4.42	4.67	TSS	AK155130	BC068281	NM_173416	hypothetical protein LOC238037
chr12	4924841	8.41	7.21	5.98	5.36	21.43	18.58	14.04	19.42	14.53	22.61	17.36	27	22.45	6.72	8.85	18.69	TSS	NM_001099628	Atad2b	NM_001099628	ATPase family, AAA domain containing 2B
chr12	5940977	22.43	27.93	25.64	22.32	16.07	11.5	12.28	14.56	14.53	11.3	27.78	19	23.47	14.29	16.81	18.69	Intergenic
chr12	7984373	41.12	39.64	35.04	36.61	35.71	35.4	27.19	24.27	29.06	31.3	26.39	23	20.41	21.01	25.66	24.3	TSS	BC100607	Apob		Mus musculus apolipoprotein B, mRNA (cDNA clone IMAGE:4163231), partial cds.
chr12	8307973	40.19	28.83	35.04	32.14	9.82	14.16	11.4	12.62	11.11	7.83	10.42	18	11.22	13.45	31.86	6.54	TSS	NM_013527	Gdf7	NM_013527	growth differentiation factor 7
chr12	8311326	14.95	15.32	14.53	9.82	3.57	3.54	4.39	5.83	5.98	7.83	10.42	13	7.14	6.72	14.16	14.02	TSS	NM_013527	Gdf7	NM_013527	growth differentiation factor 7
chr12	8507062	33.64	37.84	36.75	31.25	18.75	23.89	22.81	18.45	18.8	14.78	15.97	27	13.27	15.13	25.66	22.43	TSS	NM_007483	Rhob	NM_007483	ras homolog gene family, member B
chr12	8779042	1.87	0.9	0	0.89	21.43	10.62	24.56	7.77	17.09	20.87	2.78	5	8.16	5.04	1.77	14.95	TSS	AF134897	Sdc1	NM_011519	syndecan 1
chr12	8794305	37.38	17.12	32.48	25.89	4.46	2.65	5.26	8.74	3.42	12.17	9.03	12	2.04	7.56	16.81	7.48	Gene body	NM_011519	Sdc1	NM_011519	syndecan 1
chr12	9578437	15.89	11.71	18.8	16.96	3.57	7.08	4.39	4.85	5.98	6.09	9.72	8	7.14	15.13	17.7	2.8	TSS	AK006240	AK006240		Mus musculus adult male testis cDNA, RIKEN full-length enriched library, clone:1700022H16 product:unclassifiable, full insert sequence.
chr12	10397939	1.87	0	0	0	25.89	13.27	30.7	17.48	23.93	23.48	22.22	18	12.24	27.73	22.12	49.53	TSS	NM_023697	Rdh14	NM_023697	alcohol dehydrogenase PAN2
chr12	11152349	10.28	13.51	12.82	14.29	6.25	3.54	5.26	5.83	5.98	6.09	9.72	5	5.1	8.4	9.73	3.74	Gene body	NM_173417	Kcns3	NM_173417	potassium voltage-gated channel,
chr12	11444977	2.8	3.6	1.71	1.79	15.18	7.96	8.77	9.71	11.11	11.3	8.33	5	4.08	3.36	3.54	13.08	TSS	AK133134	AK133134		Mus musculus adult male testis cDNA, RIKEN full-length enriched library, clone:4930511A02 product:unclassifiable, full insert sequence.
chr12	12269180	0.93	0.9	0.85	0	16.07	6.19	7.89	9.71	7.69	11.3	4.17	7	9.18	2.52	1.77	37.38	TSS	AK047142	D12Ertd553e	NM_029758	hypothetical protein LOC76820
chr12	12659437	8.41	9.91	6.84	10.71	25	26.55	26.32	21.36	35.9	20.87	31.94	19	28.57	32.77	27.43	31.78	Intergenic
chr12	12794871	85.05	76.58	68.38	80.36	116.96	112.39	127.19	113.59	143.59	94.78	115.28	102	123.47	98.32	113.27	138.32	Intergenic
chr12	13002649	45.79	44.14	49.57	44.64	20.54	26.55	26.32	23.3	26.5	17.39	28.47	28	15.31	27.73	38.94	18.69	Intergenic
chr12	15857408	34.58	39.64	32.48	41.96	17.86	16.81	21.05	14.56	12.82	49.57	47.92	19	21.43	29.41	27.43	28.97	Gene body	AK045700	AK045700		Mus musculus adult male corpora quadrigemina cDNA, RIKEN full-length enriched library, clone:B230306E04 product:unclassifiable, full insert sequence.
chr12	16192885	0	0	0	0	13.39	14.16	8.77	15.53	9.4	12.17	11.81	8	19.39	10.92	13.27	9.35	Intergenic
chr12	16504953	28.04	30.63	39.32	33.04	14.29	17.7	16.67	11.65	16.24	26.96	22.92	24	29.59	31.93	34.51	6.54	Intergenic
chr12	16596749	13.08	10.81	18.8	12.5	5.36	3.54	1.75	2.91	2.56	4.35	9.03	13	2.04	5.04	6.19	4.67	TSS	AK154837	Lpin1	NM_172950	lipin 1 isoform a
chr12	16766461	10.28	14.41	17.09	14.29	2.68	7.08	6.14	2.91	4.27	10.43	2.08	4	6.12	5.04	3.54	4.67	Intergenic
chr12	16901467	0.93	1.8	0.85	2.68	19.64	10.62	20.18	11.65	7.69	10.43	15.97	17	8.16	15.13	5.31	18.69	TSS	NM_009072	Rock2	NM_009072	Rho-associated coiled-coil forming kinase 2
chr12	17007236	110.28	121.62	117.09	118.75	147.32	153.98	144.74	137.86	139.32	183.48	152.08	164	183.67	159.66	167.26	184.11	TSS	AK089230	Pqlc3	NM_172574	PQ loop repeat containing
chr12	17331375	0	0	0.85	0.89	13.39	13.27	4.39	6.8	10.26	16.52	14.58	18	14.29	11.76	17.7	16.82	TSS	BC056636	Atp6v1c2	NM_133699	vacuolar H+ ATPase C2
chr12	17432879	49.53	40.54	46.15	50.89	27.68	49.56	14.91	26.21	47.86	35.65	25.69	25	25.51	29.41	25.66	33.64	Gene body	NM_001008421	Nol10	NM_001008421	nucleolar protein 10
chr12	17512798	60.75	60.36	55.56	59.82	25.89	30.97	21.93	23.3	31.62	72.17	58.33	25	24.49	25.21	21.24	28.04	Intergenic
chr12	17706698	7.48	16.22	14.53	8.93	2.68	0	0	0	0	6.96	10.42	13	0	5.88	0	14.02	Gene body	NM_016677	Hpcal1	NM_016677	hippocalcin-like 1
chr12	18521155	11.21	11.71	7.69	8.93	26.79	28.32	41.23	31.07	29.91	20.87	14.58	13	64.29	10.92	14.16	13.08	TSS	NM_001033157	5730507C01Rik	NM_001033157	hypothetical protein LOC236366
chr12	18616711	6.54	4.5	4.27	5.36	16.07	13.27	19.3	20.39	21.37	12.17	9.72	14	24.49	2.52	3.54	5.61	Intergenic
chr12	18616761	3.74	1.8	3.42	2.68	23.21	18.58	30.7	38.83	16.24	24.35	13.19	16	40.82	5.88	10.62	5.61	Intergenic
chr12	19181540	50.47	75.68	68.38	60.71	27.68	14.16	19.3	12.62	18.8	28.7	17.36	34	26.53	45.38	33.63	50.47	Intergenic
chr12	20262642	16.82	15.32	22.22	16.96	8.93	6.19	6.14	9.71	6.84	12.17	6.94	5	7.14	7.56	9.73	11.21	Intergenic
chr12	20732810	19.63	21.62	11.11	7.14	0	0	0	0	0	2.61	0.69	0	0	0	1.77	0.93	Intergenic
chr12	20821185	58.88	81.98	65.81	68.75	156.25	160.18	138.6	109.71	152.14	152.17	127.08	66	216.33	110.08	109.73	177.57	TSS	BC050987	BC050987		Mus musculus adult male testis cDNA, RIKEN full-length enriched library, clone:1700030C10 product:unclassifiable, full insert sequence.
chr12	20821592	11.21	9.91	11.11	14.29	35.71	20.35	30.7	33.01	24.79	31.3	22.92	23	58.16	12.61	11.5	20.56	TSS	BC050987	BC050987		Mus musculus adult male testis cDNA, RIKEN full-length enriched library, clone:1700030C10 product:unclassifiable, full insert sequence.
chr12	21147051	80.37	84.68	82.05	86.61	25	35.4	36.84	28.16	38.46	28.7	73.61	48	13.27	63.87	40.71	44.86	Gene body	AK147622	Ddef2	NM_001098168	development and differentiation enhancing factor
chr12	21166500	6.54	9.91	9.4	8.04	0	0	0	0	0	4.35	5.56	3	0	3.36	0	8.41	Gene body	AK147622	Ddef2	NM_001098168	development and differentiation enhancing factor
chr12	21574477	14.95	19.82	18.8	19.64	3.57	7.96	5.26	6.8	5.98	3.48	4.17	8	2.04	7.56	12.39	2.8	Intergenic
chr12	23255288	1.87	0.9	0.85	0	20.54	13.27	46.49	34.95	17.95	40.87	12.5	4	52.04	5.04	5.31	25.23	Intergenic
chr12	24781927	3.74	3.6	1.71	3.57	19.64	10.62	28.07	31.07	21.37	16.52	9.72	9	32.65	7.56	5.31	32.71	TSS	AK020080	9030624G23Rik		Adult male colon cDNA, RIKEN full-length enriched library, clone:9030624G23 product:hypothetical protein, full insert sequence.
chr12	25335795	65.42	59.46	70.94	70.54	37.5	38.94	39.47	33.98	28.21	34.78	59.03	44	22.45	43.7	58.41	29.91	TSS	NM_178357	Klf11	NM_178357	Kruppel-like factor 11
chr12	25577502	0	1.8	0	0	40.18	53.1	40.35	37.86	53.85	67.83	43.75	41	75.51	84.87	65.49	86.92	Gene body	AK215458	Mboat2		Mus musculus 10, 11 days embryo whole body cDNA, RIKEN full-length enriched library, clone:2810049G06 product:hypothetical Membrane bound O-acyl transferase (MBOAT) containing protein, full insert sequence.
chr12	25697537	0	0	0	0	8.04	11.5	3.51	6.8	6.84	6.09	4.17	2	7.14	3.36	9.73	2.8	Intergenic
chr12	25796394	22.43	23.42	20.51	20.54	6.25	6.19	7.89	8.74	5.98	25.22	8.33	8	6.12	11.76	7.96	8.41	Intergenic
chr12	25894164	88.79	113.51	87.18	91.07	39.29	44.25	44.74	45.63	63.25	101.74	82.64	48	34.69	67.23	48.67	59.81	Intergenic
chr12	25911469	54.21	34.23	70.94	44.64	1.79	2.65	2.63	5.83	5.13	21.74	34.03	6	0	5.04	4.42	3.74	Intergenic
chr12	25954245	17.76	17.12	21.37	27.68	2.68	13.27	7.02	7.77	5.13	7.83	17.36	4	4.08	5.88	6.19	6.54	Intergenic
chr12	27154862	0.93	0.9	0	0	10.71	11.5	22.81	7.77	11.97	10.43	2.78	10	9.18	9.24	0.88	21.5	TSS	NM_020557	Tyki	NM_020557	thymidylate kinase family LPS-inducible member
chr12	27660540	3.74	1.8	3.42	2.68	4.46	6.19	6.14	12.62	17.09	3.48	17.36	9	9.18	17.65	13.27	10.28	Intergenic
chr12	28409786	14.02	9.91	15.38	12.5	25	29.2	40.35	23.3	35.9	36.52	31.94	36	46.94	39.5	42.48	23.36	Intergenic
chr12	29203502	0.93	0.9	1.71	0	8.04	23.01	21.05	19.42	11.97	20.87	17.36	12	16.33	21.01	11.5	18.69	Gene body	AK003729	1110015M06Rik		18-day embryo whole body cDNA, RIKEN full-length enriched library, clone:1110015M06 product:hypothetical Doublecortin containing protein, full insert sequence.
chr12	29384567	30.84	32.43	37.61	33.93	14.29	21.24	19.3	15.53	17.09	13.91	15.28	21	12.24	17.65	28.32	13.08	Intergenic
chr12	29939518	1.87	0.9	0.85	0	31.25	13.27	19.3	30.1	20.51	42.61	19.44	22	23.47	10.92	8.85	29.91	Intergenic
chr12	30466108	0	0	0	0	8.04	11.5	12.28	12.62	11.11	13.04	22.92	12	21.43	5.04	17.7	10.28	Intergenic
chr12	30622805	20.56	24.32	23.93	24.11	12.5	12.39	14.04	11.65	14.53	12.17	8.33	11	13.27	28.57	15.93	8.41	TSS	NM_181395	Pxdn	NM_181395	peroxidasin
chr12	30623209	4.67	5.41	2.56	2.68	26.79	14.16	42.98	28.16	24.79	25.22	24.31	18	20.41	0.84	1.77	24.3	TSS	NM_181395	Pxdn	NM_181395	peroxidasin
chr12	31956588	39.25	35.14	39.32	41.07	19.64	20.35	17.54	14.56	22.22	13.04	18.75	27	17.35	32.77	42.48	16.82	3End	AK051131	Lamb1-1		Mus musculus 12 days embryo spinal ganglion cDNA, RIKEN full-length enriched library, clone:D130003D08 product:laminin B1 subunit 1, full insert sequence.
chr12	32340096	15.89	18.02	12.82	16.07	33.04	34.51	40.35	34.95	33.33	27.83	18.06	12	24.49	24.37	15.93	31.78	TSS	AK030656	Cog5		6 days neonate head cDNA, RIKEN full-length enriched library, clone:5430405C01 product:PUTATIVE 13 S GOLGI TRANSPORT COMPLEX 90KD SUBUNIT BRAIN-SPECIFIC ISOFORM homolog (Fragment).
chr12	32746122	61.68	56.76	58.12	55.36	85.71	79.65	79.82	76.7	83.76	60.87	61.81	91	79.59	90.76	65.49	114.95	TSS	BC048710	Prkar2b	NM_011158	protein kinase, cAMP dependent regulatory, type
chr12	33513422	60.75	55.86	58.12	63.39	17.86	25.66	16.67	19.42	24.79	29.57	41.67	28	9.18	35.29	35.4	28.04	Gene body	NM_021524	Pbef1	NM_021524	pre-B-cell colony-enhancing factor 1
chr12	33705133	9.35	13.51	13.68	13.39	4.46	4.42	2.63	5.83	16.24	9.57	7.64	5	5.1	5.88	3.54	3.74	Intergenic
chr12	33767032	17.76	13.51	15.38	14.29	8.04	7.08	7.89	6.8	9.4	5.22	7.64	5	11.22	11.76	15.93	4.67	Gene body	NM_001024478	1110049B09Rik	NM_001024478	hypothetical protein LOC68764
chr12	33859189	34.58	36.94	49.57	39.29	13.39	11.5	7.89	6.8	13.68	15.65	18.06	13	13.27	15.97	26.55	15.89	Gene body	BC100598	Atxn7l4		Mus musculus 10, 11 days embryo whole body cDNA, RIKEN full-length enriched library, clone:2810423G08 product:hypothetical protein, full insert sequence.
chr12	33996213	16.82	16.22	21.37	17.86	8.04	7.96	10.53	6.8	10.26	6.96	10.42	17	5.1	10.08	16.81	4.67	Intergenic
chr12	34651453	33.64	35.14	35.9	37.5	70.54	53.1	54.39	60.19	62.39	80	55.56	55	67.35	47.9	56.64	83.18	Intergenic
chr12	39991433	44.86	37.84	38.46	43.75	19.64	25.66	25.44	23.3	26.5	22.61	50	45	32.65	40.34	30.09	32.71	Intergenic
chr12	40292379	0.93	0.9	17.95	0	0	0	0	0.97	0	0.87	0	11	24.49	16.81	18.58	7.48	Intergenic
chr12	40860862	23.36	38.74	5.13	21.43	22.32	36.28	27.19	23.3	29.06	23.48	21.53	11	13.27	9.24	14.16	14.02	TSS	AK167739	Scin	NM_009132	scinderin
chr12	40949675	7.48	10.81	12.82	11.61	0.89	0.88	0.88	0.97	1.71	1.74	3.47	5	1.02	0.84	0	0.93	TSS	NM_013562	Ifrd1	NM_013562	interferon-related developmental regulator 1
chr12	41174573	0	0	30.77	0	0	0	0	0	0	0	0	30	28.57	22.69	32.74	10.28	TSS	AK030653	mKIAA0716		Mus musculus adult male pituitary gland cDNA, RIKEN full-length enriched library, clone:5330406C03 product:hypothetical Src homology 3 (SH3) domain/Repeat in HS1/Cortactin containing protein, full insert sequence.
chr12	45521388	16.82	17.12	20.51	18.75	8.04	12.39	3.51	5.83	6.84	6.09	7.64	7	5.1	5.88	8.85	6.54	Intergenic
chr12	46164711	13.08	15.32	16.24	10.71	5.36	6.19	5.26	7.77	6.84	5.22	13.19	5	2.04	4.2	3.54	4.67	Gene body	NM_144552	Stxbp6	NM_144552	syntaxin binding protein 6 (amisyn)
chr12	46500535	17.76	18.92	19.66	16.07	8.93	7.08	9.65	9.71	8.55	9.57	27.78	14	15.31	22.69	17.7	6.54	Intergenic
chr12	48448037	20.56	19.82	21.37	21.43	8.93	11.5	7.89	8.74	9.4	9.57	11.11	7	9.18	15.13	18.58	3.74	Intergenic
chr12	48731756	21.5	28.83	21.37	21.43	11.61	11.5	7.02	8.74	7.69	15.65	6.25	9	6.12	10.08	3.54	1.87	Intergenic
chr12	50484991	7.48	8.11	9.4	6.25	24.11	17.7	21.05	20.39	17.95	22.61	18.06	11	13.27	6.72	15.04	18.69	TSS	NM_008241	Foxg1	NM_008241	forkhead box G1
chr12	50492952	15.89	18.02	14.53	16.96	30.36	28.32	28.07	28.16	23.08	21.74	25	16	29.59	21.01	16.81	28.04	TSS	AK043991	AK043991		Mus musculus 13 days embryo head cDNA, RIKEN full-length enriched library, clone:3110039M17 product:unclassifiable, full insert sequence.
chr12	52442785	20.56	27.03	30.77	25.89	7.14	10.62	9.65	8.74	5.13	39.13	16.67	14	5.1	8.4	7.96	12.15	Intergenic
chr12	52478334	2.8	2.7	0.85	0.89	39.29	10.62	35.09	40.78	20.51	20.87	22.22	26	33.67	8.4	7.08	63.55	TSS	NM_029825	Scfd1	NM_029825	sec1 family domain containing 1
chr12	52792192	17.76	12.61	14.53	9.82	2.68	6.19	3.51	2.91	3.42	1.74	6.94	6	4.08	9.24	15.93	3.74	TSS	BC001985	Ap4s1		Mus musculus AP-4 adaptor complex sigma4 subunit mRNA, complete cds.
chr12	52949253	29.91	26.13	33.33	24.11	8.04	2.65	7.02	8.74	8.55	13.04	20.83	8	7.14	9.24	7.96	10.28	Intergenic
chr12	53936275	53.27	37.84	48.72	37.5	15.18	18.58	17.54	11.65	21.37	18.26	25.69	13	14.29	21.85	50.44	8.41	Intergenic
chr12	55264259	26.17	19.82	17.09	19.64	3.57	3.54	7.02	5.83	5.13	8.7	3.47	6	5.1	12.61	8.85	3.74	Intergenic
chr12	55571191	26.17	28.83	27.35	29.46	14.29	17.7	15.79	15.53	17.95	29.57	25.69	10	20.41	16.81	19.47	14.02	Intergenic
chr12	55963560	0	0	0	0	12.5	6.19	13.16	4.85	12.82	8.7	6.25	2	2.04	11.76	4.42	13.08	TSS	NM_007688	Cfl2	NM_007688	cofilin 2, muscle
chr12	55990280	10.28	14.41	12.82	8.93	2.68	7.08	3.51	0	8.55	9.57	7.64	1	2.04	2.52	1.77	2.8	Intergenic
chr12	56086418	0.93	0.9	0	0	23.21	5.31	18.42	14.56	7.69	10.43	6.94	3	11.22	8.4	0.88	23.36	TSS	AK135668	cbp146		Mus musculus gene-trap line CT 146 cbp146 (cbp146) mRNA, partial cds.
chr12	56565118	14.02	17.12	17.95	19.64	5.36	9.73	11.4	5.83	7.69	1.74	4.86	6	5.1	6.72	7.96	5.61	Intergenic
chr12	56593910	20.56	18.92	14.53	17.86	25.89	15.04	31.58	66.99	17.09	19.13	20.14	78	56.12	80.67	54.87	44.86	TSS	NM_010907	Nfkbia	NM_010907	nuclear factor of kappa light chain gene
chr12	57712924	0.93	1.8	0.85	1.79	14.29	6.19	13.16	7.77	10.26	22.61	6.25	3	9.18	3.36	0.88	19.63	TSS	NM_008701	Nkx2-9	NM_008701	NK2 transcription factor related, locus 9
chr12	57782395	2.8	4.5	2.56	3.57	16.96	16.81	18.42	10.68	15.38	15.65	5.56	9	11.22	4.2	1.77	11.21	Intergenic
chr12	57783289	33.64	31.53	39.32	35.71	23.21	20.35	18.42	24.27	22.22	21.74	36.81	25	19.39	29.41	31.86	32.71	Intergenic
chr12	58152119	28.04	19.82	22.22	22.32	4.46	7.08	7.02	6.8	5.98	9.57	6.94	6	6.12	10.08	8.85	2.8	Intergenic
chr12	58473256	23.36	21.62	18.8	24.11	10.71	14.16	10.53	12.62	11.97	20	11.11	13	18.37	23.53	22.12	14.02	Intergenic
chr12	60119211	30.84	25.23	37.61	29.46	14.29	10.62	7.89	10.68	8.55	10.43	11.81	14	5.1	7.56	27.43	7.48	Gene body	NM_025656	Sip1	NM_025656	survivor of motor neuron protein interacting
chr12	60232697	1.87	3.6	1.71	2.68	13.39	9.73	12.28	10.68	6.84	6.09	4.17	15	8.16	0	3.54	3.74	TSS	AK157358	Ctage5	NM_146034	CTAGE family, member 5
chr12	62624083	10.28	9.01	9.4	11.61	25	22.12	25.44	22.33	16.24	20	10.42	12	25.51	10.08	7.96	19.63	TSS	AK043502	AK043502		Mus musculus 10 days neonate cortex cDNA, RIKEN full-length enriched library, clone:A830002A04 product:unclassifiable, full insert sequence.
chr12	62657372	25.23	23.42	31.62	25	8.93	7.96	9.65	6.8	11.97	14.78	15.28	10	19.39	13.45	15.04	3.74	Gene body	BC052038	Lrfn5	NM_178714	leucine rich repeat and fibronectin type III
chr12	66032787	0	0	0	0.89	4.46	10.62	16.67	7.77	23.08	11.3	17.36	9	7.14	17.65	15.04	8.41	Intergenic
chr12	66521295	35.51	36.04	36.75	35.71	17.86	20.35	17.54	21.36	17.95	26.96	24.31	20	25.51	35.29	23.89	25.23	Intergenic
chr12	68322346	69.16	62.16	71.79	60.71	43.75	37.17	32.46	35.92	43.59	34.78	48.61	53	79.59	47.9	55.75	23.36	TSS	AK038962	Mdga2		Mus musculus adult male diencephalon cDNA, RIKEN full-length enriched library, clone:9330209L04 product:unclassifiable, full insert sequence.
chr12	70285458	0.93	0.9	0	0.89	8.04	8.85	14.04	7.77	13.68	13.91	2.08	5	1.02	5.88	0	12.15	TSS	NM_025589	Rpl36al	NM_025589	ribosomal protein L36a-like
chr12	70298446	2.8	1.8	0.85	2.68	24.11	16.81	32.46	25.24	16.24	35.65	4.86	18	9.18	29.41	1.77	61.68	TSS	AK034052	AK034052		Mus musculus adult male diencephalon cDNA, RIKEN full-length enriched library, clone:9330151L19 product:hypothetical Myc-type, helix-loop-helix dimerization domain containing protein, full insert sequence.
chr12	70826338	12.15	12.61	12.82	9.82	19.64	13.27	17.54	11.65	12.82	12.17	25.69	27	29.59	19.33	23.89	21.5	TSS	AK009141	Atp5s	NM_026536	ATP synthase, H+ transporting, mitochondrial F0
chr12	70891720	0	0	0	0	8.93	7.08	15.79	10.68	9.4	6.96	0.69	7	6.12	5.88	0.88	14.02	TSS	NM_183294	Cdkl1	NM_183294	cyclin-dependent kinase-like 1 (CDC2-related
chr12	71047028	27.1	23.42	29.06	30.36	7.14	7.96	10.53	3.88	8.55	12.17	24.31	8	8.16	11.76	6.19	7.48	TSS	AK015327	Spg3a		Mus musculus adult male testis cDNA, RIKEN full-length enriched library, clone:4930435M24 product:hypothetical protein, full insert sequence.
chr12	71087627	0	0.9	0	0.89	18.75	15.93	35.09	15.53	27.35	17.39	5.56	3	8.16	27.73	0	38.32	TSS	NM_022028	Sav1	NM_022028	salvador homolog 1
chr12	71325123	33.64	30.63	27.35	30.36	49.11	47.79	57.02	61.17	48.72	33.91	42.36	44	34.69	49.58	49.56	36.45	Gene body	NM_133198	Pygl	NM_133198	liver glycogen phosphorylase
chr12	71325973	23.36	18.92	17.09	16.96	5.36	7.96	5.26	3.88	5.98	5.22	13.19	8	8.16	11.76	7.96	3.74	Gene body	NM_133198	Pygl	NM_133198	liver glycogen phosphorylase
chr12	71642864	12.15	6.31	7.69	7.14	0	0	0	0	2.56	0.87	3.47	0	0	0	0.88	0	Intergenic
chr12	72212581	1.87	3.6	1.71	2.68	25	11.5	17.54	24.27	14.53	24.35	6.94	11	34.69	4.2	11.5	29.91	TSS	AK016101	4930553D19Rik		Adult male testis cDNA, RIKEN full-length enriched library, clone:4930553D19 product:hypothetical MAS20 protein import receptor signature containing protein, full insert sequence.
chr12	73026462	102.8	56.76	68.38	68.75	10.71	17.7	12.28	14.56	19.66	20.87	33.33	26	10.2	24.37	25.66	20.56	Gene body	AK053785	Daam1	NM_172464	dishevelled associated activator of
chr12	73822999	14.95	9.91	12.82	17.86	1.79	2.65	2.63	3.88	3.42	6.09	6.25	1	2.04	8.4	0.88	5.61	Intergenic
chr12	74646498	0	0	0	0	17.86	15.04	21.93	33.01	6.84	11.3	2.08	29	15.31	14.29	9.73	40.19	TSS	NM_178715	Tmem30b	NM_178715	transmembrane protein 30B
chr12	76409960	45.79	48.65	46.15	48.21	33.93	29.2	26.32	30.1	26.5	30.43	33.33	39	32.65	36.97	38.05	22.43	TSS	NM_023275	Rhoj	NM_023275	ras homolog gene family, member J
chr12	76920741	18.69	14.41	15.38	16.96	8.04	8.85	7.02	7.77	9.4	10.43	13.19	16	9.18	10.92	17.7	7.48	TSS	NM_001005510	Syne2	NM_001005510	synaptic nuclear envelope 2
chr12	77505986	12.15	13.51	11.11	9.82	48.21	27.43	37.72	37.86	33.33	35.65	26.39	26	27.55	14.29	15.04	57.94	TSS	NM_001002012	Hspa2	NM_001002012	heat shock protein 2
chr12	77635492	0	0.9	0.85	0.89	6.25	14.16	25.44	14.56	17.09	13.91	0.69	4	2.04	9.24	0	21.5	TSS	NM_153804	Plekhg3	NM_153804	pleckstrin homology domain containing, family G
chr12	77692713	23.36	16.22	23.08	19.64	4.46	15.93	7.02	6.8	9.4	9.57	4.86	9	6.12	8.4	7.96	8.41	Intergenic
chr12	78601828	27.1	22.52	18.8	15.18	6.25	3.54	5.26	5.83	10.26	21.74	19.44	8	5.1	5.04	4.42	6.54	Intergenic
chr12	79157449	21.5	18.02	17.95	25	1.79	4.42	7.02	2.91	7.69	9.57	6.94	6	4.08	4.2	6.19	2.8	Intergenic
chr12	81213385	42.06	36.94	39.32	39.29	29.46	31.86	29.82	32.04	27.35	19.13	36.11	51	13.27	15.97	25.66	31.78	TSS	NM_007564	Zfp36l1	NM_007564	zinc finger protein 36, C3H type-like 1
chr12	81721683	32.71	45.95	41.03	41.07	24.11	25.66	20.18	22.33	23.93	18.26	38.89	34	33.67	30.25	35.4	35.51	Intergenic
chr12	81745456	73.83	60.36	66.67	64.29	45.54	38.94	30.7	33.98	37.61	27.83	47.92	57	38.78	28.57	61.06	42.06	TSS	AK008025	Slc39a9		Mus musculus adult male small intestine cDNA, RIKEN full-length enriched library, clone:2010002A02 product:similar to CDNA FLJ11274 FIS, CLONE PLACE1009368, WEAKLY SIMILAR TO METAL HOMEOSTASIS FACTOR ATX2 [Homo sapiens], full insert sequence.
chr12	82288827	20.56	11.71	11.97	14.29	1.79	1.77	4.39	1.94	2.56	2.61	6.25	5	1.02	0	6.19	1.87	3End	AK040931	Smoc1	NM_022316	SPARC related modular calcium binding 1
chr12	82469995	10.28	12.61	14.53	16.07	3.57	6.19	3.51	3.88	5.98	21.74	8.33	3	4.08	6.72	4.42	4.67	Intergenic
chr12	83178530	14.02	13.51	9.4	13.39	1.79	3.54	1.75	1.94	1.71	7.83	7.64	2	5.1	1.68	5.31	2.8	Intergenic
chr12	83717749	3.74	2.7	3.42	1.79	20.54	7.96	18.42	14.56	13.68	15.65	10.42	8	19.39	1.68	4.42	24.3	TSS	NM_015812	Rgs6	NM_015812	regulator of G-protein signaling 6
chr12	84716263	39.25	31.53	37.61	36.61	15.18	20.35	21.05	20.39	23.08	28.7	16.67	15	18.37	20.17	21.24	14.95	Gene body	AK012970	Dpf3	NM_058212	D4, zinc and double PHD fingers, family 3
chr12	84815147	69.16	49.55	63.25	60.71	30.36	29.2	23.68	26.21	23.08	25.22	27.78	29	35.71	32.77	47.79	31.78	Gene body	AK039011	Dpf3		Adult male hypothalamus cDNA, RIKEN full-length enriched library, clone:A230085B09 product:cerebellum D4, full insert sequence.
chr12	84861602	60.75	73.87	64.96	61.61	121.43	92.92	102.63	111.65	109.4	100.87	109.72	97	121.43	64.71	84.07	122.43	Intergenic
chr12	84935308	20.56	13.51	16.24	13.39	1.79	6.19	2.63	6.8	2.56	4.35	10.42	4	3.06	4.2	6.19	4.67	Gene body	NM_183154	Zfyve1	NM_183154	zinc finger, FYVE domain containing 1
chr12	85292281	18.69	26.13	17.09	21.43	95.54	50.44	74.56	68.93	54.7	74.78	54.86	73	78.57	26.89	34.51	111.21	TSS	NM_023633	2410016O06Rik	NM_023633	RIKEN cDNA 2410016O06
chr12	85496562	10.28	10.81	11.11	8.93	3.57	1.77	3.51	3.88	3.42	2.61	8.33	2	3.06	10.08	3.54	2.8	Gene body	AK081554	C130039O16Rik		NOD-derived CD11c +ve dendritic cells cDNA, RIKEN full-length enriched library, clone:F630318A22 product:Hypothetical proline-rich region/Myb DNA binding domain/ELM2 domain containing protein, full insert sequence. (Fragment).
chr12	85509066	5.61	9.91	7.69	8.93	2.68	1.77	1.75	0	0	4.35	0	1	0	0	0.88	0.93	Gene body	AK081554	C130039O16Rik		NOD-derived CD11c +ve dendritic cells cDNA, RIKEN full-length enriched library, clone:F630318A22 product:Hypothetical proline-rich region/Myb DNA binding domain/ELM2 domain containing protein, full insert sequence. (Fragment).
chr12	85533713	64.49	58.56	56.41	53.57	122.32	85.84	121.05	113.59	95.73	89.57	93.06	127	82.65	74.79	70.8	132.71	TSS	AK081554	C130039O16Rik		NOD-derived CD11c +ve dendritic cells cDNA, RIKEN full-length enriched library, clone:F630318A22 product:Hypothetical proline-rich region/Myb DNA binding domain/ELM2 domain containing protein, full insert sequence. (Fragment).
chr12	85749383	57.94	63.96	49.57	55.36	93.75	82.3	101.75	105.83	100.85	87.83	75	99	77.55	55.46	75.22	67.29	TSS	NM_001026214	Entpd5	NM_001026214	ectonucleoside triphosphate diphosphohydrolase 5
chr12	86114311	34.58	30.63	25.64	40.18	91.96	70.8	103.51	112.62	83.76	76.52	79.86	77	67.35	56.3	44.25	92.52	TSS	BC022589	Hbld1		Hbld1 protein.
chr12	86337690	73.83	59.46	59.83	57.14	32.14	30.09	26.32	29.13	36.75	12.17	34.72	36	19.39	15.13	46.9	22.43	TSS	AB033168	Ylpm1	NM_178363	YLP motif containing 1
chr12	86629140	57.01	54.95	47.01	55.36	98.21	76.11	99.12	78.64	85.47	63.48	107.64	90	54.08	61.34	78.76	123.36	TSS	NM_172414	2810002I04Rik	NM_172414	hypothetical protein LOC72350
chr12	86629728	62.62	55.86	70.94	56.25	129.46	100.88	116.67	157.28	114.53	103.48	126.39	96	119.39	58.82	76.11	114.95	TSS	NM_172414	2810002I04Rik	NM_172414	hypothetical protein LOC72350
chr12	86715237	0	0	0	0	15.18	10.62	13.16	15.53	19.66	11.3	13.89	10	7.14	16.81	7.08	10.28	TSS	NM_026775	Tmed10	NM_026775	transmembrane emp24 domain-containing protein
chr12	86715239	7.48	5.41	7.69	11.61	44.64	33.63	44.74	52.43	29.91	33.91	38.19	54	29.59	17.65	25.66	40.19	TSS	NM_026775	Tmed10	NM_026775	transmembrane emp24 domain-containing protein
chr12	86729588	10.28	6.31	9.4	13.39	26.79	53.98	45.61	54.37	52.14	41.74	58.33	61	39.8	57.14	38.94	60.75	Intergenic
chr12	86910935	44.86	31.53	41.03	38.39	12.5	14.16	7.89	12.62	17.09	12.17	13.19	18	18.37	25.21	43.36	16.82	Intergenic
chr12	86924815	23.36	23.42	23.08	20.54	16.96	32.74	24.56	21.36	29.06	35.65	21.53	30	37.76	34.45	34.51	36.45	Intergenic
chr12	87583061	32.71	35.14	40.17	34.82	16.96	22.12	14.91	18.45	15.38	13.91	18.75	27	17.35	19.33	47.79	19.63	TSS	AK031712	Kiaa1152		Uncharacterized protein C14orf118 homolog.
chr12	87848971	12.15	11.71	11.11	8.93	1.79	2.65	2.63	2.91	2.56	2.61	6.25	1	2.04	4.2	15.93	0	Gene body	AK044339	Esrrb	NM_011934	estrogen related receptor, beta
chr12	87859798	19.63	13.51	12.82	13.39	4.46	3.54	3.51	4.85	5.98	1.74	5.56	5	4.08	4.2	25.66	2.8	Gene body	NM_011934	Esrrb	NM_011934	estrogen related receptor, beta
chr12	87909023	0	0	0	0	19.64	50.44	28.95	32.04	29.06	26.09	33.33	23	55.1	26.05	41.59	31.78	Intergenic
chr12	88177644	93.46	64.86	80.34	79.46	33.93	30.09	23.68	20.39	27.35	20.87	40.97	42	19.39	73.95	60.18	23.36	Intergenic
chr12	88329431	13.08	16.22	17.09	13.39	7.14	6.19	7.02	6.8	4.27	5.22	9.72	13	13.27	7.56	7.96	8.41	TSS	NM_001080943	Zdhhc22	NM_001080943	zinc finger, DHHC-type containing 22
chr12	88488217	0	0.9	0.85	0.89	15.18	7.96	22.81	5.83	10.26	8.7	4.17	10	9.18	2.52	0	18.69	TSS	AB041613	Gstz1	NM_010363	glutathione transferase zeta 1
chr12	88541356	13.08	12.61	11.97	14.29	32.14	30.09	29.82	33.01	32.48	42.61	25	25	24.49	7.56	16.81	28.97	TSS	NM_001033475	Tmed8	NM_001033475	transmembrane emp24 domain containing 8
chr12	88728825	2.8	2.7	2.56	5.36	21.43	8.85	18.42	17.48	15.38	13.91	9.72	8	6.12	14.29	7.08	28.97	TSS	NM_011479	Sptlc2	NM_011479	serine palmitoyltransferase, long chain base
chr12	90394997	12.15	9.01	10.26	9.82	18.75	21.24	28.07	23.3	19.66	22.61	8.33	14	18.37	26.05	14.16	27.1	Gene body	AK082055	Nrxn3		Mus musculus adult male medulla oblongata cDNA, RIKEN full-length enriched library, clone:6332407J11 product:neurexin III, full insert sequence.
chr12	92289126	27.1	23.42	36.75	30.36	3.57	2.65	1.75	6.8	1.71	32.17	18.06	9	5.1	10.92	3.54	3.74	Gene body	AK017349	AK017349		Mus musculus 6 days neonate head cDNA, RIKEN full-length enriched library, clone:5430427M07 product:unclassifiable, full insert sequence.
chr12	92876861	29.91	27.93	29.06	35.71	6.25	10.62	8.77	9.71	10.26	9.57	19.44	9	12.24	15.13	26.55	8.41	3End	NM_175367	Ston2	NM_175367	stonin 2
chr12	92932245	36.45	25.23	28.21	33.04	6.25	5.31	7.89	9.71	8.55	13.04	17.36	8	3.06	15.13	5.31	13.08	3End	AK040110	AK040110		Mus musculus 0 day neonate thymus cDNA, RIKEN full-length enriched library, clone:A430062N11 product:unclassifiable, full insert sequence.
chr12	93017139	100.93	114.41	94.02	91.07	56.25	57.52	44.74	56.31	67.52	55.65	65.97	68	41.84	67.23	84.96	62.62	Intergenic
chr12	97695594	18.69	22.52	18.8	16.96	8.93	9.73	6.14	8.74	7.69	7.83	20.83	12	14.29	9.24	17.7	15.89	Intergenic
chr12	98455978	18.69	15.32	17.95	18.75	5.36	6.19	3.51	5.83	6.84	6.09	5.56	9	10.2	5.88	10.62	2.8	Intergenic
chr12	98564861	13.08	12.61	15.38	16.96	8.04	6.19	4.39	5.83	6.84	9.57	8.33	10	12.24	13.45	15.93	7.48	Intergenic
chr12	99963959	33.64	19.82	29.06	24.11	4.46	6.19	5.26	2.91	6.84	11.3	10.42	9	2.04	7.56	15.04	0.93	Gene body	NM_011877	Ptpn21	NM_011877	protein tyrosine phosphatase, non-receptor type
chr12	99972043	74.77	72.97	65.81	68.75	104.46	95.58	93.86	91.26	103.42	93.04	65.97	100	103.06	64.71	83.19	88.79	TSS	NM_011877	Ptpn21	NM_011877	protein tyrosine phosphatase, non-receptor type
chr12	100500466	22.43	12.61	17.09	15.18	5.36	6.19	8.77	2.91	1.71	10.43	20.83	3	4.08	6.72	4.42	4.67	Gene body	AK180878	Foxn3		Mus musculus 6 days neonate head cDNA, RIKEN full-length enriched library, clone:5430426H20 product:checkpoint suppressor 1, full insert sequence.
chr12	100669997	34.58	21.62	49.57	28.57	3.57	7.08	4.39	8.74	5.13	17.39	19.44	9	5.1	8.4	7.96	8.41	Intergenic
chr12	101381189	21.5	18.92	23.08	28.57	1.79	1.77	4.39	2.91	4.27	13.04	12.5	10	7.14	7.56	10.62	0	Gene body	BC051175	BC002230		Uncharacterized protein C14orf102 homolog.
chr12	101438868	56.07	41.44	51.28	52.68	22.32	29.2	21.93	23.3	28.21	21.74	33.33	51	20.41	22.69	53.1	30.84	TSS	NM_009790	Calm1	NM_009790	calmodulin 1
chr12	101757946	67.29	95.5	74.36	91.07	124.11	125.66	124.56	110.68	119.66	91.3	80.56	81	79.59	78.99	69.91	88.79	TSS	AK046740	AK046740		Mus musculus adult male cortex cDNA, RIKEN full-length enriched library, clone:B530045F04 product:weakly similar to HYPOTHETICAL PROTEIN KIAA1140 (FRAGMENT) [Homo sapiens], full insert sequence.
chr12	103051188	13.08	13.51	11.11	12.5	3.57	5.31	4.39	2.91	5.13	2.61	5.56	4	7.14	9.24	11.5	6.54	Gene body	NM_011812	Fbln5	NM_011812	fibulin 5
chr12	103367710	16.82	18.92	16.24	13.39	36.61	16.81	22.81	38.83	23.93	25.22	25	35	38.78	31.93	31.86	49.53	TSS	AK044239	Slc24a4		Sodium/potassium/calcium exchanger 4 precursor (Na(+)/K(+)/Ca(2+)- exchange protein 4).
chr12	103521984	57.01	59.46	43.59	54.46	122.32	91.15	106.14	132.04	90.6	107.83	105.56	99	100	49.58	70.8	112.15	TSS	AK154963	Rin3	NM_177620	Ras and Rab interactor 3
chr12	103562166	39.25	36.04	35.04	41.96	3.57	6.19	9.65	7.77	8.55	14.78	23.61	8	5.1	8.4	17.7	8.41	Gene body	AK167187	Rin3		Mus musculus adult male olfactory brain cDNA, RIKEN full-length enriched library, clone:6430500K07 product:Ras and Rab interactor 3, full insert sequence.
chr12	103862313	22.43	26.13	20.51	23.21	12.5	15.04	12.28	11.65	15.38	15.65	14.58	17	8.16	18.49	23.01	14.02	Gene body	NM_172584	Itpk1	NM_172584	inositol 1,3,4-triphosphate 5/6 kinase
chr12	103934107	37.38	18.02	33.33	33.93	5.36	2.65	7.02	6.8	5.98	14.78	18.75	11	4.08	6.72	11.5	9.35	Gene body	NM_172584	Itpk1	NM_172584	inositol 1,3,4-triphosphate 5/6 kinase
chr12	104586177	28.97	9.91	20.51	12.5	0	0.88	0.88	0	0.85	7.83	4.17	0	1.02	0	0.88	0.93	Gene body	NM_023049	Asb2	NM_023049	ankyrin repeat and SOCS box-containing protein
chr12	104606534	42.06	38.74	34.19	40.18	65.18	58.41	59.65	69.9	58.12	66.09	47.22	66	75.51	47.06	61.06	57.94	Intergenic
chr12	104663900	4.67	3.6	2.56	4.46	16.07	12.39	16.67	8.74	17.09	5.22	3.47	4	6.12	2.52	4.42	9.35	TSS	NM_020494	Ddx24	NM_020494	DEAD (Asp-Glu-Ala-Asp) box polypeptide 24
chr12	104771354	74.77	60.36	81.2	73.21	37.5	42.48	32.46	38.83	38.46	31.3	47.92	64	27.55	49.58	82.3	42.99	TSS	NM_028980	8430415E04Rik	NM_028980	HEAT-like repeat-containing protein
chr12	104893242	16.82	14.41	16.24	25.89	1.79	2.65	4.39	2.91	5.98	6.09	13.19	5	4.08	9.24	12.39	0.93	Gene body	NM_007618	Serpina6	NM_007618	serine (or cysteine) proteinase inhibitor, clade
chr12	105230868	32.71	22.52	23.08	19.64	0.89	1.77	0.88	1.94	2.56	7.83	15.28	2	0	7.56	2.65	5.61	TSS	AK149420	Serpina11	NM_199314	serine (or cysteine) proteinase inhibitor, clade
chr12	105280799	48.6	37.84	55.56	36.61	5.36	15.04	7.89	12.62	11.11	15.65	33.33	19	8.16	15.97	16.81	1.87	TSS	NM_026535	Serpina12	NM_026535	visceral adipose-specific SERPIN
chr12	105583376	18.69	10.81	11.97	9.82	0	5.31	0.88	2.91	4.27	1.74	13.19	1	1.02	3.36	0.88	0.93	Gene body	NM_011458	Serpina3k	NM_011458	serine (or cysteine) proteinase inhibitor, clade
chr12	105634768	7.48	9.01	6.84	8.04	0	0	0.88	0.97	0.85	7.83	2.78	1	0	2.52	0	0.93	3End	NM_009253	Serpina3m	NM_009253	serine (or cysteine) proteinase inhibitor, clade
chr12	105728424	28.97	36.04	30.77	26.79	10.71	13.27	9.65	13.59	12.82	18.26	22.92	18	14.29	14.29	14.16	10.28	Intergenic
chr12	105750201	13.08	13.51	11.97	8.93	2.68	4.42	3.51	1.94	4.27	4.35	2.78	4	10.2	15.97	7.08	9.35	Intergenic
chr12	106074264	22.43	35.14	26.5	32.14	19.64	6.19	28.95	18.45	17.09	23.48	6.25	8	7.14	6.72	8.85	11.21	Gene body	AB059645	Clmn	NM_001040682	calmin isoform b
chr12	106074591	14.95	11.71	8.55	11.61	4.46	1.77	6.14	12.62	8.55	8.7	1.39	3	1.02	2.52	0.88	1.87	Gene body	AB059645	Clmn	NM_001040682	calmin isoform b
chr12	106363779	16.82	15.32	14.53	13.39	5.36	7.96	8.77	7.77	7.69	9.57	7.64	5	3.06	6.72	11.5	1.87	Intergenic
chr12	106665739	35.51	26.13	38.46	33.93	10.71	26.55	14.04	13.59	14.53	14.78	11.81	10	9.18	16.81	11.5	11.21	Intergenic
chr12	106969232	5.61	7.21	5.98	8.04	27.68	17.7	19.3	19.42	25.64	25.22	8.33	16	33.67	10.92	7.96	13.08	Gene body	AK078221	Ak7		Putative adenylate kinase 7 (EC 2.7.4.3).
chr12	107073276	3.74	5.41	5.98	6.25	16.96	15.04	22.81	14.56	17.09	20	5.56	8	16.33	20.17	4.42	19.63	3End	AK028940	Papola	NM_011112	poly (A) polymerase alpha
chr12	107248261	40.19	32.43	38.46	49.11	15.18	13.27	14.91	12.62	23.08	14.78	29.17	20	13.27	21.01	23.89	21.5	TSS	NM_011705	Vrk1	NM_011705	vaccinia related kinase 1 isoform a
chr12	107849007	10.28	12.61	15.38	15.18	2.68	4.42	6.14	2.91	3.42	5.22	4.86	4	3.06	5.88	5.31	4.67	Intergenic
chr12	109173383	16.82	14.41	19.66	19.64	7.14	7.08	8.77	5.83	7.69	6.09	10.42	8	6.12	11.76	17.7	4.67	Gene body	NM_021399	Bcl11b	NM_021399	B-cell leukemia/lymphoma 11B isoform b
chr12	109218436	1.87	0.9	0.85	0	38.39	15.04	30.7	30.1	26.5	33.91	7.64	15	33.67	3.36	1.77	17.76	Gene body	NM_001079883	Bcl11b	NM_001079883	B-cell leukemia/lymphoma 11B isoform a
chr12	109284971	18.69	24.32	29.91	36.61	4.46	2.65	6.14	3.88	5.98	7.83	17.36	7	9.18	9.24	10.62	1.87	Intergenic
chr12	109524300	19.63	16.22	15.38	16.96	4.46	9.73	3.51	7.77	8.55	6.96	4.86	9	8.16	10.08	7.08	7.48	Intergenic
chr12	109556763	43.93	47.75	52.14	47.32	51.79	53.98	45.61	66.02	45.3	60	68.06	89	71.43	70.59	88.5	85.05	Gene body	NM_001044380	1600002O04Rik	NM_001044380	hypothetical protein LOC214305
chr12	110031360	34.58	31.53	35.04	27.68	10.71	15.93	13.16	11.65	9.4	6.09	29.86	18	1.02	21.85	25.66	21.5	TSS	NM_009537	Yy1	NM_009537	YY1 transcription factor
chr12	110074354	0	0	0	0	8.93	8.85	14.91	4.85	11.11	7.83	0.69	4	0	13.45	0.88	0.93	TSS	NM_181328	Slc25a29	NM_181328	solute carrier family 25, member 29
chr12	110201412	21.5	26.13	20.51	27.68	12.5	11.5	9.65	8.74	11.97	8.7	17.36	13	13.27	8.4	12.39	21.5	Gene body	AK147993	AK147993		Mus musculus 10 days neonate cerebellum cDNA, RIKEN full-length enriched library, clone:B930090D16 product:hypothetical Trp-Asp repeat (WD-repeat) structure containing protein, full insert sequence.
chr12	110271841	14.02	23.42	12.82	18.75	16.96	18.58	12.28	15.53	13.68	19.13	21.53	27	37.76	24.37	32.74	33.64	Gene body	AK158915	Begain		Brain-enriched guanylate kinase-associated protein.
chr12	110292151	17.76	18.92	13.68	14.29	44.64	34.51	46.49	39.81	39.32	42.61	38.89	19	58.16	19.33	15.93	44.86	Gene body	AK158915	Begain		Brain-enriched guanylate kinase-associated protein.
chr12	110691993	8.41	6.31	6.84	9.82	14.29	18.58	12.28	3.88	23.08	12.17	11.81	16	27.55	20.17	30.09	20.56	TSS	U15980	Dlk1	NM_010052	delta-like 1 homolog
chr12	111426737	10.28	10.81	7.69	8.04	31.25	23.01	21.93	32.04	20.51	21.74	22.92	30	43.88	5.04	16.81	53.27	Intergenic
chr12	111458892	33.64	26.13	27.35	32.14	8.93	15.93	11.4	12.62	14.53	10.43	15.28	14	4.08	12.61	22.12	9.35	Intergenic
chr12	111517512	0.93	2.7	1.71	0.89	18.75	10.62	30.7	23.3	8.55	12.17	8.33	18	16.33	5.88	1.77	11.21	TSS	NM_172119	Dio3	NM_172119	deiodinase, iodothyronine type III
chr12	111518912	36.45	32.43	44.44	37.5	14.29	21.24	15.79	13.59	18.8	16.52	18.06	20	22.45	26.05	38.94	31.78	TSS	NM_172119	Dio3	NM_172119	deiodinase, iodothyronine type III
chr12	111520432	63.55	62.16	60.68	67.86	28.57	34.51	26.32	24.27	31.62	31.3	25.69	30	29.59	31.09	51.33	23.36	3End	NM_172119	Dio3	NM_172119	deiodinase, iodothyronine type III
chr12	111611746	14.95	13.51	12.82	16.07	8.93	13.27	13.16	6.8	20.51	7.83	11.11	7	4.08	6.72	6.19	5.61	Intergenic
chr12	111749682	16.82	11.71	11.97	20.54	3.57	4.42	1.75	3.88	3.42	13.04	8.33	1	3.06	6.72	2.65	1.87	Gene body	NM_001081457	Ppp2r5c	NM_001081457	gamma isoform of regulatory subunit B56, protein
chr12	111839540	0.93	1.8	0.85	0	31.25	7.96	27.19	29.13	11.11	22.61	13.19	14	15.31	3.36	2.65	53.27	TSS	NM_030238	Dync1h1	NM_030238	dynein, cytoplasmic, heavy chain 1
chr12	112225339	10.28	10.81	8.55	5.36	0.89	1.77	2.63	0.97	0.85	4.35	4.17	1	3.06	3.36	4.42	1.87	Intergenic
chr12	112286003	28.97	14.41	37.61	26.79	0	0.88	2.63	2.91	2.56	9.57	16.67	0	0	5.04	6.19	0.93	Gene body	NM_198023	Rcor1	NM_198023	REST corepressor 1
chr12	112447271	25.23	23.42	26.5	16.07	0.89	6.19	0.88	6.8	7.69	7.83	22.22	7	5.1	5.88	7.96	5.61	Intergenic
chr12	112455340	12.15	8.11	11.97	4.46	1.79	0	0	0	0	0.87	0	0	0	0	0.88	0	Intergenic
chr12	112615571	2.8	0.9	0.85	1.79	20.54	7.96	16.67	11.65	8.55	10.43	4.86	8	4.08	1.68	0.88	6.54	TSS	NM_183016	Cdc42bpb	NM_183016	Cdc42 binding protein kinase beta
chr12	112645071	85.05	76.58	89.74	83.04	113.39	115.04	135.96	139.81	143.59	166.09	95.83	108	119.39	80.67	105.31	102.8	TSS	AK038816	AK038816		Mus musculus adult male hypothalamus cDNA, RIKEN full-length enriched library, clone:A230065H16 product:unclassifiable, full insert sequence.
chr12	112908835	18.69	21.62	15.38	19.64	41.07	32.74	44.74	42.72	41.88	33.91	22.92	37	38.78	39.5	26.55	72.9	TSS	NM_021273	Ckb	NM_021273	creatine kinase, brain
chr12	112951649	7.48	9.91	5.98	6.25	41.07	30.97	36.84	35.92	26.5	33.91	29.17	44	36.73	3.36	17.7	38.32	TSS	NM_026511	2810002N01Rik	NM_026511	hypothetical protein LOC68020
chr12	112997543	3.74	1.8	3.42	1.79	15.18	14.16	21.05	13.59	10.26	15.65	11.81	11	10.2	2.52	5.31	13.08	TSS	NM_001025360	Klc1	NM_001025360	kinesin light chain 1 isoform 1D
chr12	112997656	6.54	5.41	8.55	7.14	19.64	22.12	12.28	21.36	19.66	16.52	19.44	29	16.33	14.29	15.93	53.27	TSS	NM_001025360	Klc1	NM_001025360	kinesin light chain 1 isoform 1D
chr12	113334682	42.06	48.65	48.72	49.11	58.04	53.1	45.61	47.57	58.97	31.3	52.78	35	30.61	35.29	28.32	26.17	Intergenic
chr12	113368465	44.86	43.24	49.57	58.93	23.21	28.32	19.3	24.27	24.79	19.13	21.53	26	12.24	21.85	44.25	29.91	TSS	CS444510	CS444510		CS444510
chr12	113384883	24.3	27.93	18.8	23.21	54.46	46.02	59.65	75.73	55.56	69.57	52.08	57	54.08	11.76	21.24	68.22	TSS	NM_001097621	Kif26a	NM_001097621	kinesin family member 26A
chr12	113440769	0.93	0.9	0	0	3.57	15.93	16.67	10.68	13.68	18.26	12.5	17	3.06	21.01	7.08	8.41	Intergenic
chr12	113742600	6.54	5.41	5.13	4.46	25.89	36.28	32.46	60.19	24.79	34.78	35.42	37	7.14	21.01	16.81	42.06	Gene body	NM_178915	Tmem179	NM_178915	hypothetical protein LOC104885
chr12	113826391	23.36	18.92	16.24	21.43	8.93	6.19	7.89	10.68	9.4	10.43	24.31	6	4.08	7.56	7.08	5.61	TSS	NM_198411	2610204M08Rik	NM_198411	formin, inverted
chr12	113864139	27.1	27.93	23.93	21.43	7.14	12.39	11.4	8.74	8.55	11.3	21.53	15	9.18	15.97	7.08	11.21	Gene body	NM_007421	Adssl1	NM_007421	adenylosuccinate synthetase 1
chr12	113931723	0.93	0	0	0	9.82	6.19	15.79	3.88	13.68	7.83	3.47	0	1.02	5.88	0.88	13.08	Intergenic
chr12	113945357	40.19	40.54	37.61	37.5	47.32	46.9	50	49.51	47.01	43.48	36.11	46	23.47	26.89	38.05	23.36	Intergenic
chr12	114047608	86.92	67.57	92.31	75.89	28.57	44.25	27.19	32.04	41.88	30.43	35.42	41	34.69	34.45	69.91	28.97	TSS	BC090976	BC022687	NM_145450	hypothetical protein LOC217887
chr12	114179972	67.29	54.05	57.26	68.75	28.57	34.51	33.33	31.07	29.91	21.74	29.17	43	24.49	37.82	46.9	25.23	TSS	NM_025399	Nudt14	NM_025399	nudix (nucleoside diphosphate linked moiety
chr12	114378846	25.23	27.03	27.35	25	8.93	11.5	13.16	9.71	9.4	5.22	18.75	12	4.08	6.72	15.93	11.21	TSS	NM_024223	Crip2	NM_024223	LIM only protein HLP
chr12	114379374	69.16	54.05	60.68	68.75	23.21	26.55	22.81	27.18	24.79	21.74	41.67	45	16.33	22.69	58.41	28.04	TSS	NM_024223	Crip2	NM_024223	LIM only protein HLP
chr12	114389314	72.9	59.46	91.45	60.71	16.96	25.66	24.56	31.07	17.95	29.57	43.06	26	12.24	22.69	28.32	22.43	TSS	NM_007763	Crip1	NM_007763	cysteine-rich protein 1 (intestinal)
chr12	116976675	13.08	18.92	16.24	14.29	4.46	7.96	5.26	3.88	5.98	7.83	13.19	4	9.18	6.72	10.62	6.54	Gene body		abParts		Parts of antibodies, mostly variable regions.
chr12	117519737	1.87	3.6	4.27	2.68	16.96	8.85	17.54	12.62	14.53	13.91	9.72	15	6.12	0	3.54	18.69	TSS	AK044360	D12Ertd551e	NM_028731	chr2 synaptotagmin
chr12	117728770	20.56	11.71	13.68	16.07	4.46	5.31	2.63	4.85	2.56	6.09	5.56	4	2.04	11.76	13.27	4.67	Gene body	NM_011215	Ptprn2	NM_011215	protein tyrosine phosphatase, receptor type, N
chr12	118973276	45.79	47.75	52.99	59.82	14.29	14.16	16.67	14.56	15.38	17.39	17.36	12	8.16	21.85	32.74	15.89	Gene body	NM_175930	Rapgef5	NM_175930	guanine nucleotide exchange factor for Rap1
chr12	119027188	7.48	9.91	10.26	12.5	39.29	45.13	31.58	28.16	29.06	52.17	35.42	54	59.18	46.22	45.13	66.36	Intergenic
chr12	119082264	3.74	4.5	5.13	5.36	8.04	8.85	5.26	4.85	8.55	7.83	3.47	11	11.22	19.33	12.39	17.76	TSS	NM_146040	Cdca7l	NM_146040	transcription factor RAM2
chr12	120093671	0	0.9	0	0	22.32	5.31	18.42	10.68	22.22	9.57	4.86	1	3.06	10.08	0.88	17.76	3End	NM_177082	Sp8	NM_177082	trans-acting transcription factor 8
chr12	120094318	39.25	36.04	29.91	32.14	16.07	18.58	13.16	11.65	17.95	16.52	15.28	15	10.2	44.54	36.28	15.89	Intergenic
chr13	3564952	10.28	9.01	8.55	12.5	0	0.88	0	0	0.85	0.87	3.47	0	4.08	1.68	0.88	1.87	3End	AK220437	BC016423		MKIAA2006 protein (Fragment).
chr13	3633460	60.75	55.86	54.7	55.36	73.21	73.45	82.46	84.47	87.18	65.22	83.33	102	67.35	78.15	92.04	116.82	TSS	NM_080857	Asb13	NM_080857	ankyrin repeat and SOCS box-containing protein
chr13	5359610	20.56	21.62	16.24	17.86	9.82	9.73	7.89	10.68	9.4	18.26	11.11	10	8.16	10.92	12.39	5.61	Intergenic
chr13	6470629	12.15	5.41	8.55	10.71	3.57	0.88	0.88	1.94	3.42	7.83	8.33	0	1.02	0.84	0	0	Intergenic
chr13	6646771	67.29	54.95	56.41	58.04	72.32	63.72	75.44	76.7	62.39	64.35	75.69	98	84.69	107.56	84.07	92.52	TSS	NM_019703	Pfkp	NM_019703	phosphofructokinase, platelet
chr13	6647545	47.66	52.25	48.72	45.54	25.89	21.24	27.19	26.21	31.62	26.96	54.17	45	39.8	47.9	38.05	34.58	TSS	NM_019703	Pfkp	NM_019703	phosphofructokinase, platelet
chr13	7383861	8.41	9.01	8.55	12.5	1.79	1.77	2.63	1.94	4.27	3.48	4.17	2	4.08	5.04	9.73	2.8	Intergenic
chr13	9763788	2.8	1.8	1.71	2.68	16.07	7.96	11.4	10.68	11.11	11.3	4.17	17	7.14	2.52	5.31	28.04	TSS	BC058999	Zmynd11	NM_144516	zinc finger, MYND domain containing 11
chr13	9881815	41.12	44.14	46.15	36.61	35.71	46.02	37.72	17.48	29.06	33.91	22.22	24	25.51	23.53	27.43	18.69	Gene body	NM_033269	Chrm3	NM_033269	cholinergic receptor, muscarinic 3, cardiac
chr13	11967310	0	0	0	0	26.79	17.7	44.74	22.33	62.39	25.22	52.08	3	13.27	72.27	19.47	43.93	Gene body	BC059061	Ryr2		Ryr2 protein.
chr13	12029890	15.89	16.22	16.24	19.64	7.14	6.19	5.26	6.8	8.55	12.17	10.42	9	15.31	7.56	13.27	6.54	Gene body	BC059061	Ryr2		Ryr2 protein.
chr13	12193536	27.1	23.42	23.93	28.57	41.96	38.05	36.84	48.54	42.74	27.83	44.44	42	55.1	45.38	62.83	28.97	Gene body	NM_023868	Ryr2	NM_023868	ryanodine receptor 2, cardiac
chr13	12548854	38.32	27.03	36.75	30.36	10.71	7.08	14.04	15.53	13.68	13.91	44.44	13	5.1	9.24	7.96	8.41	Gene body	NM_018886	Lgals8	NM_018886	lectin, galactose binding, soluble 8
chr13	14114300	28.97	36.94	39.32	31.25	8.93	15.93	8.77	10.68	9.4	11.3	17.36	9	9.18	15.97	15.04	5.61	Gene body	AK160447	Tbce		Mus musculus 10 days embryo whole body cDNA, RIKEN full-length enriched library, clone:2610206D02 product:tubulin-specific chaperone e, full insert sequence.
chr13	15857407	15.89	18.92	18.8	16.07	8.04	5.31	9.65	7.77	7.69	9.57	14.58	16	8.16	8.4	13.27	12.15	Intergenic
chr13	17163041	9.35	9.01	6.84	10.71	0.89	0	0.88	0.97	4.27	0	0	0	0	0	0	0	Gene body	NM_138654	5033411D12Rik	NM_138654	hypothetical protein LOC192136
chr13	17955044	24.3	30.63	41.03	33.04	6.25	10.62	7.02	8.74	5.13	5.22	1.39	3	5.1	10.08	6.19	9.35	Intergenic
chr13	18277300	14.02	21.62	14.53	14.29	4.46	6.19	5.26	3.88	7.69	7.83	9.72	8	10.2	15.13	12.39	6.54	Intergenic
chr13	19617844	14.95	17.12	17.95	18.75	8.04	11.5	9.65	10.68	9.4	9.57	13.89	13	13.27	5.88	12.39	12.15	Intergenic
chr13	21419098	2.8	1.8	0.85	0.89	14.29	7.96	25.44	20.39	16.24	12.17	9.72	9	16.33	0.84	1.77	3.74	Intergenic
chr13	22098674	2.8	4.5	2.56	2.68	24.11	14.16	13.16	10.68	19.66	14.78	7.64	17	13.27	4.2	2.65	5.61	Gene body	NM_019429	Prss16	NM_019429	protease, serine, 16 (thymus)
chr13	23516571	75.7	71.17	76.07	87.5	44.64	53.1	45.61	55.34	41.88	22.61	61.11	63	15.31	49.58	71.68	47.66	TSS	NM_013924	Abt1	NM_013924	activator of basal transcription
chr13	23864986	46.73	45.95	46.15	44.64	63.39	53.98	55.26	66.02	47.86	36.52	70.83	66	59.18	60.5	59.29	65.42	Intergenic
chr13	24420794	28.97	15.32	19.66	24.11	0	0.88	0	1.94	2.56	5.22	13.89	3	0	5.88	0.88	3.74	TSS	AB061276	Cmah	NM_007717	cytidine monophospho-N-acetylneuraminic acid
chr13	24457711	13.08	9.91	9.4	10.71	0.89	1.77	0.88	1.94	0.85	9.57	14.58	0	2.04	1.68	0.88	0.93	Gene body	AK172386	AK172386		Mus musculus mammary gland RCB-0527 Jyg-MC(B) cDNA, RIKEN full-length enriched library, clone:G930028L21 product:unclassifiable, full insert sequence.
chr13	24648730	18.69	12.61	29.06	15.18	0	0.88	0	0.97	0	17.39	13.19	2	1.02	3.36	0	0.93	Intergenic
chr13	24892722	17.76	12.61	17.95	20.54	11.61	6.19	3.51	7.77	5.98	5.22	10.42	5	4.08	3.36	6.19	4.67	TSS	NM_024473	BC005537	NM_024473	hypothetical protein LOC79555
chr13	24924063	36.45	39.64	33.33	39.29	57.14	54.87	50	60.19	50.43	48.7	42.36	56	53.06	26.89	31.86	44.86	TSS	AK167707	Ttrap	NM_019551	Traf and Tnf receptor associated protein
chr13	25043735	13.08	10.81	10.26	9.82	20.54	25.66	18.42	29.13	21.37	8.7	13.89	44	25.51	25.21	26.55	19.63	Gene body	NM_008156	Gpld1	NM_008156	glycosylphosphatidylinositol specific
chr13	29044354	20.56	24.32	14.53	18.75	70.54	46.02	77.19	58.25	52.99	60.87	39.58	53	41.84	36.97	17.7	82.24	TSS	NM_009238	Sox4	NM_009238	SRY-box containing gene 4
chr13	29962388	14.02	18.92	18.8	16.07	6.25	7.96	6.14	5.83	8.55	11.3	4.17	7	2.04	10.08	19.47	3.74	Intergenic
chr13	30080734	30.84	39.64	35.9	37.5	17.86	14.16	18.42	19.42	19.66	14.78	47.22	35	22.45	24.37	23.89	25.23	TSS	NM_010093	E2f3	NM_010093	E2F transcription factor 3
chr13	30565249	8.41	7.21	11.97	11.61	1.79	0.88	0.88	0	1.71	2.61	1.39	2	2.04	6.72	9.73	3.74	Intergenic
chr13	30752093	17.76	18.02	12.82	16.07	8.04	5.31	5.26	3.88	5.13	7.83	9.72	8	6.12	7.56	9.73	7.48	TSS	NM_134068	Dusp22	NM_134068	dual specificity phosphatase TS-DSP2 isoform b
chr13	30968635	10.28	10.81	15.38	8.93	4.46	1.77	2.63	2.91	2.56	4.35	7.64	5	3.06	4.2	5.31	6.54	Intergenic
chr13	31146386	11.21	7.21	16.24	13.39	0	0	0	0	0.85	10.43	9.03	0	1.02	3.36	3.54	0	Intergenic
chr13	31898090	0.93	1.8	1.71	4.46	45.54	15.93	38.6	35.92	26.5	35.65	9.72	13	11.22	38.66	7.08	34.58	TSS	NM_008592	Foxc1	NM_008592	forkhead box C1
chr13	31903183	0	0.9	0.85	0	8.04	4.42	6.14	11.65	10.26	12.17	6.25	8	5.1	0.84	1.77	12.15	3End	NM_008592	Foxc1	NM_008592	forkhead box C1
chr13	31903223	4.67	5.41	5.13	3.57	14.29	11.5	21.93	14.56	14.53	22.61	7.64	15	23.47	2.52	7.08	4.67	3End	NM_008592	Foxc1	NM_008592	forkhead box C1
chr13	32430434	0	0	1.71	0.89	25	7.96	19.3	23.3	11.97	31.3	21.53	23	25.51	0	4.42	31.78	TSS	AK086076	Gmds	NM_146041	GDP-mannose 4, 6-dehydratase
chr13	34744434	14.02	11.71	11.97	16.07	3.57	5.31	6.14	2.91	3.42	0.87	7.64	10	3.06	4.2	10.62	7.48	TSS	BC037079	1300014I06Rik		Mus musculus adult male liver cDNA, RIKEN full-length enriched library, clone:1300014I06 product:hypothetical protein, full insert sequence.
chr13	35473768	39.25	29.73	35.9	32.14	13.39	5.31	7.02	17.48	11.11	18.26	29.86	19	13.27	11.76	13.27	17.76	Intergenic
chr13	35475643	3.74	3.6	1.71	1.79	32.14	45.13	28.07	33.98	35.9	33.04	40.97	41	56.12	51.26	38.05	50.47	Intergenic
chr13	36210111	68.22	70.27	67.52	76.79	96.43	107.08	116.67	112.62	96.58	83.48	100	111	104.08	115.13	92.04	79.44	TSS	NM_001039189	Fars2	NM_001039189	phenylalanine-tRNA synthetase 2 (mitochondrial)
chr13	36823372	43.93	42.34	43.59	51.79	20.54	21.24	16.67	24.27	27.35	17.39	31.25	36	27.55	15.97	40.71	15.89	Gene body	NM_153529	Nrn1	NM_153529	neuritin 1
chr13	36826934	0	0	0.85	0.89	49.11	18.58	25.44	32.04	16.24	42.61	33.33	48	33.67	1.68	16.81	30.84	TSS	NM_153529	Nrn1	NM_153529	neuritin 1
chr13	37403205	39.25	43.24	36.75	41.07	36.61	40.71	35.09	42.72	52.14	43.48	40.28	50	60.2	57.14	58.41	55.14	Intergenic
chr13	37543560	45.79	36.94	35.9	41.07	13.39	18.58	15.79	9.71	21.37	28.7	26.39	18	17.35	12.61	11.5	14.95	TSS	AK008767	AK008767		Mus musculus adult male stomach cDNA, RIKEN full-length enriched library, clone:2210022D18 product:unclassifiable, full insert sequence.
chr13	37870021	14.95	14.41	13.68	8.04	4.46	5.31	7.02	5.83	4.27	4.35	6.25	12	11.22	19.33	15.04	14.02	Intergenic
chr13	38058368	35.51	37.84	39.32	34.82	15.18	18.58	19.3	24.27	35.9	16.52	25	15	19.39	20.17	14.16	14.95	3End	AY993942	Ssr1	NM_025965	signal sequence receptor, alpha
chr13	38155222	22.43	22.52	25.64	17.86	8.93	7.96	11.4	10.68	6.84	16.52	15.97	11	20.41	13.45	17.7	14.95	3End	AK014182	Riok1		13 days embryo head cDNA, RIKEN full-length enriched library, clone:3110046C13 product:SIMILAR TO CG11660 GENE PRODUCT homolog.
chr13	38437734	16.82	17.12	15.38	17.86	30.36	32.74	29.82	25.24	30.77	38.26	20.83	29	38.78	15.97	17.7	25.23	TSS	NM_007556	Bmp6	NM_007556	bone morphogenetic protein 6
chr13	38727029	5.61	7.21	5.98	6.25	18.75	18.58	27.19	20.39	17.09	14.78	14.58	13	15.31	2.52	5.31	19.63	TSS	AK039050	Muted		Muted protein.
chr13	40328475	6.54	9.01	7.69	12.5	2.68	2.65	1.75	0.97	0.85	5.22	2.78	2	3.06	5.04	2.65	3.74	Intergenic
chr13	40537394	47.66	44.14	52.14	42.86	29.46	31.86	18.42	26.21	22.22	22.61	43.06	30	34.69	26.89	30.09	30.84	Intergenic
chr13	40802896	10.28	9.91	11.11	12.5	4.46	3.54	2.63	1.94	2.56	0	4.17	3	7.14	10.92	10.62	2.8	Intergenic
chr13	41008834	29.91	42.34	42.74	34.82	14.29	15.04	11.4	20.39	11.97	13.91	22.22	16	8.16	16.81	15.04	14.95	Intergenic
chr13	41103859	15.89	9.91	15.38	8.93	4.46	1.77	1.75	1.94	2.56	2.61	9.72	3	3.06	1.68	7.96	1.87	Gene body	BC024629	Pak1ip1		Mus musculus p21-activated protein kinase-interacting protein 1 mRNA, complete cds.
chr13	41111920	34.58	36.04	35.9	32.14	66.96	64.6	50.88	56.31	56.41	53.91	36.11	71	39.8	30.25	46.02	44.86	TSS	AK089021	Tmem14c	NM_025387	transmembrane protein 14C
chr13	41292938	65.42	59.46	72.65	75.89	28.57	42.48	30.7	27.18	36.75	35.65	43.75	44	21.43	41.18	70.8	21.5	Gene body	NM_019423	Elovl2	NM_019423	elongation of very long chain fatty acids-like
chr13	41388049	9.35	13.51	12.82	11.61	2.68	7.96	6.14	5.83	5.98	2.61	3.47	4	5.1	5.04	5.31	3.74	Intergenic
chr13	41431461	14.02	8.11	11.11	9.82	0.89	1.77	1.75	1.94	2.56	5.22	4.86	4	0	3.36	3.54	1.87	Gene body	NM_017464	Nedd9	NM_017464	neural precursor cell expressed, developmentally
chr13	41437290	11.21	11.71	10.26	12.5	4.46	4.42	4.39	2.91	4.27	8.7	5.56	10	1.02	7.56	8.85	3.74	Gene body	NM_017464	Nedd9	NM_017464	neural precursor cell expressed, developmentally
chr13	41519095	30.84	32.43	30.77	31.25	14.29	15.93	15.79	12.62	14.53	8.7	15.28	23	15.31	13.45	23.89	15.89	Intergenic
chr13	41667615	27.1	27.03	31.62	38.39	5.36	14.16	7.89	8.74	10.26	16.52	10.42	11	11.22	15.13	15.04	14.02	Intergenic
chr13	42405369	22.43	16.22	23.93	16.96	6.25	4.42	7.02	5.83	9.4	7.83	2.78	7	11.22	13.45	20.35	0.93	3End	NM_010104	Edn1	NM_010104	endothelin 1
chr13	42844844	20.56	22.52	25.64	25	8.04	9.73	8.77	6.8	12.82	15.65	18.06	8	15.31	9.24	7.96	5.61	Gene body	BC048407	Phactr1	NM_001005740	phosphatase and actin regulator 1 isoform 2
chr13	43398777	4.67	3.6	5.13	4.46	42.86	19.47	48.25	41.75	33.33	33.04	27.08	35	38.78	1.68	9.73	27.1	TSS	NM_001033399	Gfod1	NM_001033399	glucose-fructose oxidoreductase domain
chr13	43494075	0.93	0.9	0	0	8.93	8.85	22.81	8.74	12.82	6.09	2.08	4	4.08	13.45	3.54	17.76	TSS	NM_023554	Nol7	NM_023554	nucleolar protein 7
chr13	45003355	87.85	65.77	69.23	76.79	27.68	33.63	29.82	35.92	39.32	86.96	65.28	30	39.8	57.98	37.17	40.19	Gene body	AK164134	Jarid2	NM_021878	jumonji protein
chr13	45185303	11.21	9.01	12.82	12.5	2.68	6.19	3.51	9.71	5.13	6.09	10.42	6	4.08	3.36	3.54	2.8	Intergenic
chr13	45485147	1.87	0.9	0.85	0.89	10.71	6.19	8.77	12.62	5.98	6.09	2.78	16	7.14	4.2	3.54	13.08	TSS	NM_181043	Mylip	NM_181043	myosin regulatory light chain interacting
chr13	46114784	27.1	18.02	21.37	18.75	8.04	8.85	6.14	4.85	8.55	8.7	27.08	16	9.18	14.29	19.47	8.41	Intergenic
chr13	46260469	17.76	19.82	30.77	23.21	2.68	4.42	2.63	6.8	4.27	4.35	11.81	5	1.02	8.4	3.54	2.8	Intergenic
chr13	46334163	70.09	49.55	75.21	56.25	17.86	22.12	21.93	29.13	22.22	35.65	61.11	45	14.29	35.29	19.47	34.58	Intergenic
chr13	46445450	14.02	9.01	11.11	8.93	0.89	0	1.75	0.97	0.85	14.78	10.42	1	0	5.04	0	3.74	Intergenic
chr13	47025961	0.93	0	0	0	8.93	5.31	17.54	3.88	11.11	8.7	1.39	3	1.02	7.56	1.77	5.61	TSS	NM_010617	Kif13a	NM_010617	kinesin family member 13A
chr13	47332842	45.79	18.92	29.91	29.46	3.57	2.65	1.75	4.85	0.85	19.13	15.97	1	4.08	2.52	0.88	3.74	Gene body	NM_146042	Rnf144b	NM_146042	ring finger protein 144B
chr13	48357045	0.93	0.9	0	0	19.64	5.31	22.81	12.62	20.51	16.52	4.86	6	7.14	14.29	0	29.91	TSS	NM_031166	Id4	NM_031166	inhibitor of DNA binding 4
chr13	49066829	35.51	40.54	37.61	39.29	12.5	14.16	14.91	14.56	18.8	9.57	22.22	24	9.18	9.24	17.7	9.35	Gene body	BC024672	BC024672		Mus musculus 13 days embryo head cDNA, RIKEN full-length enriched library, clone:3110023O19 product:unclassifiable, full insert sequence.
chr13	49283760	57.94	63.96	56.41	67.86	34.82	42.48	31.58	39.81	35.9	24.35	50	53	26.53	25.21	57.52	52.34	TSS	NM_013610	Ninj1	NM_013610	ninjurin 1
chr13	49288623	15.89	10.81	13.68	8.04	1.79	1.77	1.75	3.88	2.56	5.22	6.25	1	1.02	3.36	0.88	3.74	Gene body	NM_013610	Ninj1	NM_013610	ninjurin 1
chr13	49346438	27.1	27.03	25.64	28.57	5.36	17.7	18.42	15.53	22.22	20.87	16.67	17	19.39	18.49	20.35	17.76	TSS	BC045525	Susd3	NM_025491	sushi domain containing 3
chr13	49732410	20.56	18.92	12.82	14.29	5.36	5.31	7.02	3.88	4.27	12.17	15.97	6	4.08	5.04	5.31	2.8	Intergenic
chr13	51938436	20.56	18.92	17.95	16.96	26.79	30.97	25.44	27.18	23.08	23.48	25.69	36	36.73	29.41	29.2	29.91	Intergenic
chr13	51941243	0.93	1.8	0.85	0.89	25.89	14.16	11.4	10.68	10.26	10.43	3.47	7	4.08	10.08	5.31	18.69	TSS	NM_011817	Gadd45g	NM_011817	growth arrest and DNA-damage-inducible 45 gamma
chr13	51968289	40.19	36.04	61.54	37.5	3.57	8.85	7.02	8.74	11.11	16.52	26.39	4	0	9.24	8.85	6.54	Intergenic
chr13	52087946	24.3	16.22	17.09	16.96	6.25	1.77	0.88	13.59	10.26	14.78	15.28	5	4.08	4.2	5.31	3.74	Intergenic
chr13	52862000	45.79	35.14	31.62	48.21	1.79	5.31	7.89	5.83	2.56	13.04	18.06	5	4.08	11.76	8.85	11.21	Intergenic
chr13	53074121	14.02	15.32	16.24	16.96	32.14	39.82	35.96	31.07	29.91	22.61	34.03	39	31.63	35.29	30.97	42.99	Gene body	NM_017373	Nfil3	NM_017373	nuclear factor, interleukin 3, regulated
chr13	53209939	19.63	19.82	13.68	11.61	4.46	5.31	5.26	2.91	2.56	4.35	9.72	7	8.16	9.24	8.85	2.8	Gene body	NM_013846	Ror2	NM_013846	receptor tyrosine kinase-like orphan receptor 2
chr13	53329929	32.71	36.04	35.9	31.25	23.21	16.81	18.42	17.48	16.24	13.04	27.08	11	16.33	19.33	29.2	14.95	Gene body	NM_013846	Ror2	NM_013846	receptor tyrosine kinase-like orphan receptor 2
chr13	53405352	42.99	44.14	34.19	54.46	104.46	103.54	106.14	88.35	156.41	115.65	111.81	75	94.9	121.01	103.54	78.5	Intergenic
chr13	53570932	0.93	1.8	0.85	0	20.54	21.24	23.68	30.1	21.37	30.43	21.53	32	17.35	41.18	38.94	17.76	TSS	NM_013601	Msx2	NM_013601	homeo box, msh-like 2
chr13	54703715	4.67	4.5	4.27	2.68	13.39	13.27	7.89	14.56	12.82	9.57	6.25	6	4.08	6.72	9.73	13.08	Gene body	AK045989	Cltb	NM_028870	clathrin, light polypeptide (Lcb)
chr13	55291471	40.19	45.95	46.15	44.64	17.86	24.78	24.56	20.39	21.37	20	41.67	32	13.27	38.66	43.36	17.76	Intergenic
chr13	55311727	36.45	43.24	37.61	45.54	91.07	70.8	71.05	78.64	76.92	77.39	72.92	82	91.84	33.61	49.56	96.26	TSS	AK172676	Nsd1		Mus musculus NSD1 (Nsd1) mRNA, partial cds.
chr13	55471249	18.69	25.23	24.79	25	7.14	8.85	8.77	8.74	11.97	5.22	11.11	15	11.22	14.29	16.81	9.35	TSS	NM_016758	Rgs14	NM_016758	regulator of G-protein signaling 14
chr13	55519784	30.84	39.64	36.75	35.71	21.43	19.47	14.04	19.42	19.66	18.26	25	37	18.37	16.81	25.66	29.91	Gene body	NM_021489	F12	NM_021489	coagulation factor XII (Hageman factor)
chr13	55573696	0.93	1.8	1.71	0.89	14.29	7.08	21.93	21.36	12.82	12.17	18.75	10	18.37	6.72	2.65	26.17	Gene body	NM_001030296	Prr7	NM_001030296	proline rich 7 (synaptic)
chr13	55615040	49.53	33.33	35.9	41.07	12.5	19.47	20.18	12.62	13.68	8.7	18.75	21	13.27	19.33	28.32	10.28	TSS	AK167476	Pdlim7		PDZ and LIM domain protein 7 (LIM mineralization protein) (LMP) (Protein enigma).
chr13	55627340	17.76	16.22	18.8	22.32	9.82	9.73	7.89	7.77	11.97	11.3	12.5	6	5.1	5.04	3.54	8.41	Gene body	NM_013739	Dok3	NM_013739	docking protein 3
chr13	55794894	17.76	16.22	16.24	12.5	37.5	31.86	35.96	42.72	25.64	35.65	25	39	32.65	6.72	20.35	58.88	TSS	NM_181278	B230219D22Rik	NM_181278	hypothetical protein LOC78521
chr13	56455562	45.79	32.43	41.03	33.04	4.46	5.31	3.51	5.83	8.55	9.57	17.36	8	2.04	5.88	5.31	5.61	Intergenic
chr13	56535747	31.78	45.95	39.32	33.93	12.5	10.62	14.91	15.53	18.8	26.96	36.11	19	16.33	18.49	16.81	9.35	Intergenic
chr13	56564888	28.97	29.73	43.59	39.29	6.25	4.42	4.39	8.74	6.84	13.04	21.53	3	5.1	8.4	7.08	6.54	Gene body	NM_177809	AU042651	NM_177809	hypothetical protein LOC328258
chr13	56578941	15.89	19.82	17.95	19.64	8.04	9.73	8.77	11.65	10.26	7.83	15.97	11	6.12	11.76	6.19	6.54	3End	NM_008373	Il9	NM_008373	interleukin 9
chr13	56904894	14.95	17.12	16.24	13.39	8.93	7.08	7.89	7.77	8.55	12.17	15.97	15	10.2	16.81	9.73	12.15	Gene body	NM_012035	Trpc7	NM_012035	transient receptor potential cation channel,
chr13	57181171	14.95	13.51	17.95	18.75	5.36	7.96	8.77	5.83	6.84	2.61	8.33	3	7.14	6.72	15.04	9.35	Intergenic
chr13	57852258	16.82	17.12	21.37	22.32	6.25	9.73	6.14	4.85	8.55	3.48	10.42	6	8.16	15.13	18.58	4.67	Gene body	NM_009262	Spock1	NM_009262	sparc/osteonectin, cwcv and kazal-like domains
chr13	58228649	47.66	55.86	46.15	62.5	22.32	25.66	17.54	19.42	12.82	10.43	29.17	33	21.43	21.01	38.94	21.5	TSS	AK019388	AK019388		Mus musculus 18-day embryo whole body cDNA, RIKEN full-length enriched library, clone:1110055B05 product:unclassifiable, full insert sequence.
chr13	58502777	4.67	5.41	2.56	3.57	32.14	13.27	23.68	18.45	15.38	14.78	17.36	24	13.27	1.68	5.31	33.64	TSS	AK028023	Hnrpk		18-day embryo whole body cDNA, RIKEN full-length enriched library, clone:1190020K22 product:heterogeneous nuclear ribonucleoprotein K, full insert sequence.
chr13	59061462	10.28	6.31	16.24	7.14	0	0	0.88	0.97	0	10.43	6.94	1	0	5.04	0.88	1.87	Intergenic
chr13	59351528	16.82	18.92	17.95	20.54	7.14	14.16	9.65	9.71	12.82	9.57	5.56	7	6.12	8.4	7.96	8.41	Intergenic
chr13	60225507	16.82	16.22	13.68	13.39	36.61	38.05	39.47	36.89	35.9	12.17	11.81	35	46.94	30.25	31.86	31.78	Intergenic
chr13	60589680	14.02	9.91	11.11	15.18	2.68	3.54	1.75	0.97	1.71	5.22	5.56	3	2.04	4.2	4.42	6.54	TSS	AK040640	AK040640		Mus musculus adult male aorta and vein cDNA, RIKEN full-length enriched library, clone:A530001N23 product:unclassifiable, full insert sequence.
chr13	60589859	33.64	54.95	41.03	47.32	5.36	16.81	8.77	8.74	13.68	13.91	23.61	7	7.14	8.4	14.16	9.35	TSS	AK040640	AK040640		Mus musculus adult male aorta and vein cDNA, RIKEN full-length enriched library, clone:A530001N23 product:unclassifiable, full insert sequence.
chr13	60810965	45.79	50.45	54.7	43.75	8.93	15.04	17.54	15.53	24.79	41.74	37.5	21	12.24	9.24	13.27	14.95	Gene body	AK009701	Dapk1		Mus musculus adult male tongue cDNA, RIKEN full-length enriched library, clone:2310039H24 product:death associated protein kinase 1, full insert sequence.
chr13	62911882	32.71	32.43	29.06	29.46	17.86	16.81	17.54	19.42	21.37	17.39	36.81	24	43.88	20.17	32.74	27.1	Intergenic
chr13	63374625	47.66	36.04	42.74	33.93	19.64	16.81	10.53	14.56	17.09	12.17	25	34	13.27	21.85	40.71	14.95	TSS	AK086954	apo		Mus musculus mRNA for aminopeptidase O (apo gene).
chr13	63400436	11.21	15.32	14.53	9.82	2.68	1.77	2.63	2.91	4.27	4.35	6.25	2	1.02	1.68	0.88	1.87	Gene body	NM_028079	2010111I01Rik	NM_028079	aminopeptidase O
chr13	63532464	0	0.9	0	0	13.39	5.31	8.77	3.88	6.84	6.09	0	1	4.08	1.68	0.88	0	TSS	NM_001042673	Fancc	NM_001042673	Fanconi anemia, complementation group C
chr13	64253955	32.71	36.94	41.03	43.75	16.07	15.93	11.4	13.59	20.51	5.22	24.31	25	10.2	11.76	29.2	17.76	TSS	NM_175494	Zfp367	NM_175494	zinc finger protein 367
chr13	69137195	28.97	25.23	26.5	25.89	35.71	37.17	41.23	38.83	40.17	37.39	32.64	20	33.67	29.41	32.74	10.28	TSS	NM_153534	Adcy2	NM_153534	adenylate cyclase 2
chr13	69438576	13.08	12.61	18.8	11.61	3.57	5.31	3.51	3.88	3.42	4.35	3.47	3	6.12	1.68	11.5	2.8	Intergenic
chr13	69672634	4.67	6.31	2.56	3.57	29.46	14.16	42.11	23.3	20.51	17.39	21.53	19	6.12	6.72	6.19	31.78	TSS	AK152550	Pols	NM_198600	DNA polymerase sigma
chr13	69686812	33.64	39.64	36.75	42.86	11.61	18.58	9.65	10.68	13.68	15.65	23.61	8	6.12	11.76	19.47	9.35	Intergenic
chr13	69827211	26.17	22.52	33.33	27.68	2.68	6.19	4.39	4.85	8.55	13.91	10.42	3	5.1	9.24	15.93	3.74	Intergenic
chr13	69878098	0	0	0	0.89	25.89	2.65	5.26	12.62	6.84	19.13	3.47	7	15.31	3.36	5.31	9.35	TSS	BC116979	3110006E14Rik		3110006E14Rik protein (Fragment).
chr13	69949126	42.99	40.54	41.88	36.61	57.14	63.72	61.4	62.14	63.25	69.57	56.25	55	68.37	54.62	51.33	49.53	TSS	NM_138596	Med10	NM_138596	mediator of RNA polymerase II transcription,
chr13	72353177	13.08	9.91	8.55	8.04	2.68	0.88	1.75	1.94	1.71	5.22	2.78	4	7.14	12.61	4.42	2.8	Intergenic
chr13	72477971	25.23	17.12	32.48	33.93	5.36	1.77	4.39	0.97	3.42	10.43	15.97	7	2.04	16.81	12.39	5.61	Intergenic
chr13	72478058	14.02	17.12	13.68	16.96	4.46	6.19	7.02	7.77	6.84	5.22	10.42	7	5.1	13.45	5.31	8.41	Intergenic
chr13	73171484	23.36	18.92	19.66	21.43	44.64	38.05	27.19	38.83	25.64	33.91	27.08	37	40.82	38.66	46.9	39.25	Intergenic
chr13	73406010	14.95	13.51	8.55	9.82	83.04	38.94	63.16	65.05	38.46	66.09	44.44	69	98.98	19.33	23.01	90.65	Gene body	NM_018885	Irx4	NM_018885	Iroquois related homeobox 4
chr13	73408337	3.74	5.41	1.71	2.68	66.96	19.47	55.26	42.72	30.77	53.91	27.08	22	63.27	4.2	1.77	56.07	3End	NM_018885	Irx4	NM_018885	Iroquois related homeobox 4
chr13	73605034	1.87	2.7	1.71	1.79	15.18	6.19	10.53	7.77	11.11	6.09	9.03	3	11.22	0	0.88	9.35	TSS	AK046507	Aytl2		1-acylglycerophosphocholine O-acyltransferase 1 (EC 2.3.1.23) (Lung- type acyl-coa:lysophosphatidylcholine acyltransferase 1) (mLPCAT1) (Acyltransferase-like 2).
chr13	73766120	9.35	7.21	8.55	8.04	13.39	8.85	12.28	11.65	11.11	12.17	12.5	14	17.35	13.45	15.04	18.69	TSS	AK133783	Tert	NM_009354	telomerase reverse transcriptase
chr13	73790917	20.56	13.51	23.08	21.43	1.79	3.54	1.75	4.85	5.13	8.7	8.33	8	2.04	4.2	7.96	3.74	Intergenic
chr13	73870584	2.8	1.8	1.71	0.89	27.68	10.62	44.74	33.98	24.79	32.17	20.83	35	36.73	7.56	7.96	50.47	TSS	AK052910	Slc12a7		16 days neonate heart cDNA, RIKEN full-length enriched library, clone:D830037E05 product:solute carrier family 12, member 7, full insert sequence.
chr13	73900911	91.59	88.29	82.91	79.46	47.32	53.98	37.72	47.57	47.01	33.91	50.69	52	31.63	34.45	77.88	51.4	TSS	NM_011390	Slc12a7	NM_011390	solute carrier family 12, member 7
chr13	74200078	12.15	9.01	11.11	14.29	2.68	2.65	3.51	1.94	4.27	2.61	6.94	2	4.08	4.2	10.62	5.61	TSS	BC080681	Cep72		Mus musculus 10 days embryo whole body cDNA, RIKEN full-length enriched library, clone:2610029E11 product:weakly similar to HYPOTHETICAL 50.7 KDA PROTEIN [Homo sapiens], full insert sequence.
chr13	74672927	15.89	9.01	11.97	9.82	0	0.88	1.75	0.97	1.71	5.22	8.33	2	1.02	5.04	2.65	2.8	Intergenic
chr13	75935108	14.95	18.02	17.95	16.96	33.93	29.2	29.82	38.83	23.08	33.04	22.22	43	40.82	38.66	29.2	36.45	Intergenic
chr13	77847903	28.04	18.92	20.51	22.32	5.36	8.85	3.51	4.85	5.98	6.96	8.33	2	7.14	10.92	16.81	3.74	TSS	AK165273	1110033M05Rik		6 days neonate spleen cDNA, RIKEN full-length enriched library, clone:F430007J04 product:hypothetical Endoplasmic reticulum targeting sequence containing protein, full insert sequence.
chr13	78338444	0.93	0.9	0.85	0	15.18	7.08	7.02	7.77	8.55	15.65	4.17	1	3.06	11.76	3.54	21.5	TSS	NM_010151	Nr2f1	NM_010151	nuclear receptor subfamily 2, group F, member 1
chr13	81024858	28.97	19.82	29.91	33.04	4.46	7.08	7.89	3.88	2.56	6.96	18.06	9	3.06	5.04	21.24	9.35	Gene body	BC044762	mKIAA1376		Mus musculus adult retina cDNA, RIKEN full-length enriched library, clone:A930004L03 product:hypothetical Immunoglobulin structure containing protein, full insert sequence.
chr13	81102687	32.71	21.62	31.62	26.79	8.93	7.08	12.28	12.62	10.26	23.48	19.44	14	10.2	7.56	22.12	3.74	TSS	AK038818	AK038818		Mus musculus adult male hypothalamus cDNA, RIKEN full-length enriched library, clone:A230065M06 product:unclassifiable, full insert sequence.
chr13	83861311	34.58	32.43	41.03	39.29	16.07	16.81	21.05	14.56	17.95	13.04	16.67	20	23.47	26.89	42.48	7.48	Intergenic
chr13	84398855	33.64	17.12	17.95	21.43	3.57	2.65	4.39	5.83	3.42	22.61	20.14	7	3.06	6.72	6.19	6.54	Gene body	NM_175187	Tmem161b	NM_175187	hypothetical protein LOC72745
chr13	86185834	28.04	33.33	36.75	32.14	46.43	61.95	54.39	49.51	47.86	56.52	49.31	69	54.08	68.91	68.14	57.01	TSS	NM_007749	Cox7c	NM_007749	cytochrome c oxidase, subunit VIIc
chr13	86186029	19.63	16.22	23.08	22.32	8.04	8.85	9.65	7.77	11.97	17.39	14.58	12	12.24	9.24	24.78	12.15	TSS	NM_007749	Cox7c	NM_007749	cytochrome c oxidase, subunit VIIc
chr13	89879151	5.61	9.91	7.69	9.82	32.14	29.2	42.11	20.39	33.33	36.52	16.67	13	26.53	36.97	9.73	36.45	TSS	AK087351	AK087351		Mus musculus adult male aorta and vein cDNA, RIKEN full-length enriched library, clone:A530052F04 product:unclassifiable, full insert sequence.
chr13	93614847	2.8	3.6	2.56	4.46	10.71	5.31	5.26	4.85	6.84	2.61	5.56	15	10.2	8.4	10.62	16.82	TSS	AK090249	AK090249		Mus musculus 11 days embryo spinal cord cDNA, RIKEN full-length enriched library, clone:G630026G10 product:hypothetical protein, full insert sequence.
chr13	93907171	22.43	15.32	17.95	18.75	7.14	5.31	5.26	9.71	6.84	9.57	16.67	7	8.16	10.08	7.08	14.02	Gene body	AK010195	AK010195		Mus musculus partial mRNA for myospryn protein.
chr13	94410071	52.34	54.95	47.01	56.25	11.61	7.96	9.65	9.71	14.53	32.17	38.19	10	5.1	11.76	6.19	7.48	TSS	AK149431	BHMT		Adult male liver tumor cDNA, RIKEN full-length enriched library, clone:C730009H06 product:betaine-homocysteine methyltransferase, full insert sequence.
chr13	95643791	1.87	0.9	0	0.89	35.71	8.85	31.58	23.3	19.66	27.83	11.81	19	21.43	11.76	0.88	38.32	TSS	NM_011021	Otp	NM_011021	orthopedia homolog
chr13	95683212	12.15	14.41	13.68	12.5	4.46	5.31	3.51	3.88	4.27	6.09	11.11	1	10.2	13.45	16.81	4.67	Intergenic
chr13	95698231	5.61	10.81	11.11	8.93	1.79	2.65	0.88	1.94	0.85	3.48	1.39	0	2.04	5.04	2.65	1.87	Intergenic
chr13	96434141	10.28	8.11	9.4	10.71	0	0.88	0.88	0	0.85	7.83	8.33	1	1.02	0	2.65	0	Gene body	AK042038	Iqgap2	NM_027711	IQ motif containing GTPase activating protein 2
chr13	96549418	9.35	9.01	10.26	7.14	25	25.66	35.09	42.72	35.9	40.87	35.42	39	21.43	32.77	32.74	28.97	Intergenic
chr13	96612988	16.82	8.11	12.82	11.61	0	0.88	1.75	0	0.85	6.96	7.64	3	0	2.52	3.54	0.93	Gene body	NM_027711	Iqgap2	NM_027711	IQ motif containing GTPase activating protein 2
chr13	97832948	14.95	11.71	9.4	16.07	5.36	3.54	2.63	2.91	2.56	9.57	4.17	3	2.04	2.52	3.54	3.74	Intergenic
chr13	98107302	45.79	31.53	50.43	33.04	4.46	6.19	4.39	5.83	7.69	7.83	15.97	6	4.08	10.08	13.27	1.87	Intergenic
chr13	98107522	54.21	44.14	49.57	47.32	27.68	26.55	27.19	30.1	25.64	26.96	38.89	31	30.61	50.42	39.82	30.84	Intergenic
chr13	99342677	10.28	12.61	8.55	8.04	30.36	23.89	31.58	19.42	23.08	31.3	25	22	31.63	18.49	10.62	31.78	Intergenic
chr13	99357602	17.76	12.61	14.53	12.5	30.36	37.17	42.98	36.89	36.75	27.83	34.72	27	31.63	26.89	18.58	26.17	Intergenic
chr13	99589752	48.6	39.64	39.32	43.75	12.5	19.47	10.53	12.62	16.24	8.7	28.47	25	8.16	15.13	44.25	12.15	Intergenic
chr13	99676390	13.08	12.61	10.26	11.61	3.57	1.77	3.51	1.94	3.42	10.43	11.11	4	2.04	4.2	6.19	1.87	Intergenic
chr13	99736718	67.29	54.05	56.41	52.68	23.21	27.43	32.46	40.78	39.32	80.87	58.33	25	24.49	26.89	33.63	28.97	Intergenic
chr13	100870910	10.28	15.32	10.26	19.64	0	1.77	1.75	1.94	0.85	1.74	8.33	0	1.02	3.36	0.88	0	Gene body	NM_001081061	Bdp1	NM_001081061	B double prime 1, subunit of RNA polymerase III
chr13	101373162	20.56	10.81	11.11	15.18	1.79	1.77	1.75	0.97	2.56	8.7	6.94	0	0	4.2	1.77	0.93	Gene body	NM_001038602	Marveld2	NM_001038602	MARVEL (membrane-associating) domain containing
chr13	101420732	51.4	45.95	44.44	47.32	32.14	25.66	28.07	27.18	26.5	17.39	25.69	21	31.63	23.53	42.48	22.43	TSS	NM_001044371	Rad17	NM_001044371	RAD17 homolog
chr13	101439732	17.76	23.42	17.09	17.86	47.32	51.33	33.33	59.22	47.86	53.91	45.14	57	61.22	16.81	34.51	85.05	TSS	NM_183115	Ccdc125	NM_183115	coiled-coil domain containing 125
chr13	102046963	26.17	18.02	17.95	17.86	1.79	4.42	1.75	3.88	2.56	6.96	12.5	4	4.08	6.72	7.08	2.8	Intergenic
chr13	102087991	0	0	0	0	9.82	17.7	2.63	3.88	5.98	3.48	4.17	10	13.27	7.56	14.16	14.95	Intergenic
chr13	102118544	12.15	9.01	13.68	8.93	0.89	0.88	1.75	2.91	0	12.17	14.58	1	0	1.68	0.88	0.93	Intergenic
chr13	102488178	50.47	28.83	61.54	38.39	2.68	5.31	2.63	6.8	4.27	13.91	13.89	4	2.04	9.24	5.31	4.67	Intergenic
chr13	102533669	42.99	27.93	35.9	28.57	7.14	7.96	7.89	8.74	11.11	9.57	25.69	21	4.08	4.2	19.47	10.28	Gene body	NM_001077495	Pik3r1	NM_001077495	phosphatidylinositol 3-kinase, regulatory
chr13	102631984	21.5	17.12	20.51	18.75	16.07	8.85	17.54	15.53	5.98	6.96	15.28	11	12.24	9.24	12.39	11.21	Intergenic
chr13	102642082	46.73	28.83	47.01	52.68	14.29	12.39	12.28	8.74	8.55	44.35	40.97	8	11.22	14.29	15.93	8.41	Intergenic
chr13	102694989	14.95	11.71	19.66	15.18	0	0	1.75	0.97	1.71	3.48	7.64	0	2.04	4.2	0.88	0.93	Intergenic
chr13	104500590	36.45	29.73	35.9	34.82	16.96	19.47	23.68	16.5	17.95	10.43	20.14	15	19.39	31.09	27.43	27.1	TSS	BC099526	BC099526		Mus musculus cDNA, RIKEN full-length enriched library, clone:I0C0046M05 product:unclassifiable, full insert sequence.
chr13	104564615	0.93	0	0	0	13.39	6.19	7.02	13.59	5.13	5.22	3.47	6	9.18	0	0.88	7.48	TSS	AK052265	Sfrs12		Splicing factor, arginine/serine-rich 12 (Serine-arginine-rich- splicing regulatory protein 86) (SRrp86).
chr13	104711888	89.72	90.09	64.96	86.61	203.57	215.93	165.79	169.9	168.38	175.65	162.5	189	174.49	126.89	146.02	196.26	TSS	AK169529	Erbb2ip	NM_021563	Erbb2 interacting protein isoform 2
chr13	104899481	58.88	50.45	53.85	64.29	25	32.74	33.33	28.16	29.06	28.7	30.56	43	19.39	26.89	61.06	25.23	TSS	AK138399	Nln	NM_029447	neurolysin (metallopeptidase M3 family)
chr13	105606729	34.58	38.74	45.3	41.07	18.75	16.81	21.93	20.39	24.79	12.17	18.06	17	15.31	20.17	39.82	14.02	TSS	NM_026072	Sdccag10	NM_026072	serologically defined colon cancer antigen 10
chr13	105844333	5.61	9.01	5.13	5.36	26.79	17.7	50.88	35.92	34.19	34.78	27.08	25	42.86	5.88	4.42	53.27	TSS	NM_029879	Rgs7bp	NM_029879	R7 binding protein
chr13	107778423	14.02	12.61	18.8	19.64	2.68	2.65	0	0.97	1.71	7.83	16.67	4	1.02	2.52	1.77	2.8	TSS	Y15894	Kif2a	NM_008442	kinesin family member 2A
chr13	108679224	3.74	3.6	5.13	4.46	21.43	22.12	13.16	12.62	21.37	15.65	15.28	20	18.37	5.04	12.39	29.91	TSS	AK122528	Zswim6		Zinc finger SWIM domain-containing protein 6 (Fragment).
chr13	108714078	65.42	45.95	39.32	57.14	6.25	13.27	14.91	10.68	12.82	19.13	34.03	18	9.18	59.66	29.2	25.23	Intergenic
chr13	108763125	13.08	16.22	13.68	14.29	5.36	9.73	2.63	4.85	6.84	6.09	8.33	5	3.06	5.04	4.42	3.74	Intergenic
chr13	108885962	40.19	40.54	57.26	41.96	4.46	11.5	7.02	4.85	11.97	21.74	13.89	6	5.1	13.45	15.04	14.95	Gene body	BC116977	Ndufa12l		Mimitin, mitochondrial precursor (Myc-induced mitochondrial protein) (MMTN) (NDUFA12-like protein).
chr13	109107023	16.82	20.72	23.93	21.43	8.04	10.62	7.02	6.8	10.26	6.09	6.94	8	7.14	3.36	19.47	9.35	TSS	AK043283	Depdc1b	NM_178683	DEP domain containing 1B
chr13	109211509	27.1	18.92	23.08	15.18	7.14	3.54	5.26	6.8	6.84	16.52	29.86	13	11.22	11.76	15.04	11.21	Intergenic
chr13	110815156	0	0	0	0	6.25	7.08	1.75	13.59	5.98	3.48	21.53	6	9.18	7.56	10.62	6.54	Intergenic
chr13	110846439	0	0	0	0	4.46	8.85	6.14	5.83	0	6.09	7.64	5	6.12	8.4	12.39	4.67	Intergenic
chr13	112280922	15.89	21.62	23.93	16.96	19.64	42.48	41.23	41.75	30.77	33.91	31.25	46	51.02	48.74	50.44	70.09	TSS	BC076635	Gpbp1	NM_028487	G+C-rich promoter-binding protein
chr13	112858039	14.02	8.11	9.4	8.04	0	1.77	0	0	0.85	6.96	3.47	4	0	1.68	0.88	0.93	Intergenic
chr13	113254477	0	0.9	0	0	13.39	3.54	7.02	6.8	5.98	0.87	2.08	0	2.04	0	0	13.08	TSS	NM_010560	Il6st	NM_010560	interleukin 6 signal transducer
chr13	113324050	45.79	43.24	76.92	42.86	8.04	6.19	14.91	8.74	14.53	15.65	27.08	19	11.22	24.37	31.86	12.15	Gene body	BC066164	Il31ra	NM_139299	interleukin 31 receptor A
chr13	113643730	0	0	0	0	6.25	8.85	12.28	4.85	11.97	14.78	4.17	7	0	10.08	6.19	4.67	Gene body	NM_008903	Ppap2a	NM_008903	phosphatidic acid phosphatase 2a isoform 2
chr13	113789227	43.93	48.65	40.17	48.21	79.46	68.14	61.4	79.61	73.5	80.87	70.14	48	100	31.09	38.94	83.18	Gene body	NM_001037914	EG622408	NM_001037914	hypothetical protein LOC622408
chr13	113938112	18.69	16.22	19.66	22.32	7.14	8.85	7.02	8.74	11.11	4.35	11.11	5	20.41	9.24	12.39	9.35	Intergenic
chr13	114339347	24.3	28.83	23.93	17.86	4.46	7.08	3.51	3.88	5.13	12.17	11.81	2	5.1	6.72	6.19	4.67	Intergenic
chr13	114403034	28.04	34.23	32.48	27.68	16.07	15.93	14.91	18.45	21.37	11.3	21.53	26	15.31	5.88	32.74	22.43	3End	AK155955	Snag1	NM_130796	sorting nexin associated golgi protein 1
chr13	114407696	48.6	61.26	43.59	53.57	66.96	59.29	70.18	63.11	79.49	56.52	43.06	44	50	42.02	39.82	44.86	TSS	AK155955	Snag1	NM_130796	sorting nexin associated golgi protein 1
chr13	115551255	40.19	37.84	60.68	50.89	10.71	17.7	9.65	12.62	17.95	11.3	20.83	16	10.2	24.37	26.55	12.15	Intergenic
chr13	117873449	7.48	9.91	14.53	8.93	5.36	8.85	5.26	6.8	5.13	6.96	15.97	17	12.24	13.45	12.39	15.89	Intergenic
chr13	120128689	9.35	11.71	11.11	4.46	0.89	0	0	0	0.85	0.87	2.08	0	1.02	0.84	0	0	Gene body	AK040460	Nnt	NM_008710	nicotinamide nucleotide transhydrogenase
chr13	120128731	18.69	10.81	11.97	17.86	1.79	1.77	1.75	0.97	2.56	6.09	12.5	2	4.08	3.36	1.77	4.67	Gene body	AK040460	Nnt	NM_008710	nicotinamide nucleotide transhydrogenase
chr14	7783544	19.63	20.72	22.22	26.79	8.93	7.96	7.89	10.68	7.69	10.43	11.11	15	13.27	26.05	22.12	10.28	Intergenic
chr14	8795689	54.21	41.44	57.26	52.68	12.5	21.24	14.91	22.33	20.51	15.65	32.64	23	8.16	17.65	34.51	14.02	3End	NM_007870	Dnase1l3	NM_007870	deoxyribonuclease 1-like 3 precursor
chr14	8913608	29.91	27.03	24.79	29.46	52.68	46.02	61.4	65.05	66.67	53.04	68.06	65	59.18	74.79	65.49	28.04	TSS	NM_025938	Rpp14	NM_025938	ribonuclease P 14kDa subunit
chr14	8926871	37.38	21.62	39.32	19.64	2.68	4.42	4.39	11.65	5.13	32.17	49.31	2	1.02	4.2	6.19	3.74	3End	NM_025938	Rpp14	NM_025938	ribonuclease P 14kDa subunit
chr14	9132949	15.89	13.51	14.53	14.29	23.21	28.32	21.93	28.16	26.5	26.09	15.28	20	21.43	19.33	19.47	16.82	Gene body	AK044219	BC055107	NM_183187	downregulated in renal cell carcinoma
chr14	11965449	12.15	9.01	8.55	9.82	1.79	4.42	6.14	4.85	3.42	2.61	7.64	3	2.04	2.52	2.65	1.87	Gene body	NM_010210	Fhit	NM_010210	fragile histidine triad
chr14	13175139	42.06	36.04	36.75	34.82	17.86	22.12	20.18	22.33	19.66	21.74	38.19	45	36.73	28.57	35.4	39.25	Gene body	BC055718	Fezf2	NM_080433	Fez family zinc finger 2
chr14	13367942	14.95	19.82	18.8	16.96	8.04	9.73	10.53	7.77	8.55	18.26	14.58	11	14.29	9.24	11.5	11.21	Gene body	AK133310	Cadps	NM_012061	Ca<2+>dependent activator protein for secretion
chr14	14611113	16.82	17.12	13.68	19.64	10.71	15.04	14.04	6.8	14.53	9.57	10.42	6	6.12	7.56	8.85	7.48	Intergenic
chr14	15344639	17.76	18.92	12.82	21.43	7.14	7.08	3.51	3.88	5.13	8.7	9.03	6	7.14	7.56	7.96	3.74	Intergenic
chr14	16196780	14.02	13.51	15.38	11.61	6.25	7.08	4.39	6.8	5.13	6.96	7.64	3	9.18	10.92	10.62	0.93	Gene body	NM_146052	Lrrc3b	NM_146052	leucine rich repeat containing 3B
chr14	16378195	20.56	18.92	21.37	16.96	10.71	9.73	10.53	9.71	9.4	13.91	12.5	4	5.1	7.56	12.39	6.54	Intergenic
chr14	17014864	17.76	18.02	20.51	16.96	9.82	9.73	12.28	11.65	12.82	9.57	18.75	7	9.18	10.08	13.27	10.28	Intergenic
chr14	17277547	35.51	45.95	30.77	33.93	16.96	21.24	16.67	13.59	17.09	36.52	24.31	12	17.35	13.45	14.16	16.82	Gene body	AK043726	Rarb	NM_011243	retinoic acid receptor, beta
chr14	17745518	17.76	13.51	12.82	16.07	9.82	6.19	8.77	4.85	2.56	6.96	10.42	5	6.12	6.72	4.42	4.67	Intergenic
chr14	18625066	18.69	15.32	10.26	8.93	2.68	0.88	2.63	0.97	0	0.87	0.69	2	2.04	0.84	0.88	1.87	Intergenic
chr14	19874837	5.61	5.41	2.56	4.46	33.93	24.78	45.61	30.1	24.79	41.74	9.72	10	31.63	21.85	3.54	13.08	Intergenic
chr14	20569629	8.41	6.31	8.55	7.14	12.5	19.47	18.42	14.56	16.24	7.83	9.72	23	6.12	9.24	6.19	9.35	TSS	NM_008695	Nid2	NM_008695	nidogen 2
chr14	20594084	26.17	27.93	25.64	30.36	24.11	51.33	42.11	36.89	37.61	40	34.72	46	41.84	50.42	46.9	37.38	Gene body	AK052839	Nid2	NM_008695	nidogen 2
chr14	20642846	0	0	0	0	8.04	9.73	9.65	6.8	10.26	0.87	18.06	24	11.22	10.08	8.85	14.95	TSS	NM_026528	2700060E02Rik	NM_026528	hypothetical protein LOC68045
chr14	21070033	31.78	20.72	34.19	26.79	2.68	6.19	3.51	4.85	8.55	6.09	13.19	10	2.04	8.4	12.39	6.54	Intergenic
chr14	21207935	40.19	33.33	30.77	32.14	85.71	69.03	64.04	74.76	65.81	52.17	37.5	76	53.06	34.45	34.51	73.83	TSS	AK043725	Dnajc9		10 days neonate cortex cDNA, RIKEN full-length enriched library, clone:A830025K10 product:J domain of DnaJ-like-protein 1 homolog.
chr14	21514640	0.93	2.7	0.85	1.79	24.11	11.5	19.3	17.48	13.68	8.7	13.89	9	11.22	3.36	7.08	17.76	TSS	NM_028428	Fut11	NM_028428	alpha (1,3) fucosyltransferase
chr14	21612954	15.89	34.23	16.24	16.96	17.86	19.47	16.67	19.42	17.09	25.22	33.33	31	28.57	25.21	28.32	35.51	TSS	NM_178597	Camk2g	NM_178597	calcium/calmodulin-dependent protein kinase II
chr14	22341646	15.89	12.61	10.26	11.61	0.89	0.88	1.75	0	1.71	11.3	6.94	2	2.04	2.52	1.77	0	3End	AK048336	Myst4		Histone acetyltransferase MYST4 (EC 2.3.1.48) (EC 2.3.1.-) (MYST protein 4) (MOZ, YBF2/SAS3, SAS2 and TIP60 protein 4) (Querkopf protein).
chr14	22456900	8.41	10.81	9.4	9.82	10.71	15.93	7.02	11.65	12.82	17.39	12.5	17	21.43	18.49	16.81	20.56	Intergenic
chr14	22650156	76.64	66.67	67.52	74.11	61.61	59.29	75.44	66.99	85.47	64.35	45.83	55	52.04	50.42	46.9	43.93	TSS	NM_011695	Vdac2	NM_011695	voltage-dependent anion channel 2
chr14	22723299	24.3	18.92	23.93	25.89	8.93	9.73	9.65	8.74	12.82	6.96	9.72	7	11.22	17.65	23.89	13.08	Intergenic
chr14	22807215	0.93	1.8	1.71	2.68	12.5	9.73	12.28	12.62	5.98	18.26	5.56	5	12.24	13.45	0.88	23.36	TSS	NM_145459	Zfp503	NM_145459	zinc finger protein 503
chr14	23603066	31.78	40.54	39.32	32.14	4.46	11.5	5.26	3.88	11.11	13.04	18.75	8	9.18	10.08	15.93	14.02	Intergenic
chr14	25226588	19.63	22.52	22.22	17.86	8.93	9.73	11.4	10.68	8.55	18.26	14.58	9	15.31	12.61	7.08	2.8	Intergenic
chr14	25758988	10.28	9.91	23.93	8.04	0.89	1.77	0	0.97	1.71	0.87	2.08	1	0	0	0	0.93	Intergenic
chr14	26351666	15.89	29.73	17.09	31.25	0	7.96	0	1.94	2.56	3.48	0.69	2	1.02	1.68	1.77	0.93	Intergenic
chr14	27457714	0	0.9	0.85	0	16.07	9.73	21.05	9.71	8.55	8.7	5.56	11	5.1	5.04	3.54	19.63	TSS	NM_007479	Arf4	NM_007479	ADP-ribosylation factor 4
chr14	27898109	15.89	12.61	12.82	17.86	32.14	30.09	30.7	37.86	27.35	45.22	37.5	36	34.69	36.97	44.25	28.04	TSS	AF494209	Il17rd	NM_134437	interleukin 17 receptor D
chr14	29323824	25.23	24.32	31.62	29.46	11.61	15.93	13.16	8.74	12.82	9.57	10.42	7	9.18	16.81	32.74	8.41	TSS	AK036824	Wnt5a	NM_009524	wingless-related MMTV integration site 5A
chr14	29583117	41.12	47.75	63.25	46.43	15.18	21.24	15.79	12.62	29.06	22.61	34.03	17	12.24	17.65	18.58	16.82	Intergenic
chr14	30165571	13.08	13.51	15.38	13.39	6.25	5.31	4.39	4.85	6.84	6.96	11.11	16	10.2	2.52	13.27	4.67	Intergenic
chr14	30822159	0.93	0	0	0	12.5	3.54	11.4	6.8	4.27	4.35	6.25	9	7.14	1.68	2.65	9.35	TSS	AK164042	Chdh	NM_175343	choline dehydrogenase
chr14	31452071	32.71	21.62	32.48	21.43	6.25	5.31	6.14	2.91	9.4	9.57	10.42	4	1.02	5.88	8.85	3.74	Intergenic
chr14	31467184	62.62	58.56	67.52	72.32	47.32	38.05	34.21	33.98	35.9	43.48	50.69	51	26.53	46.22	69.03	28.04	TSS	BC116369	Rft1		15 days embryo head cDNA, RIKEN full-length enriched library, clone:D930025H04 product:hypothetical protein, full insert sequence (Rft1 protein).
chr14	32229133	11.21	10.81	17.95	13.39	3.57	2.65	2.63	5.83	4.27	12.17	9.03	5	3.06	7.56	6.19	3.74	Gene body	AK043375	Sh3bp5	NM_011894	SH3-domain binding protein 5 (BTK-associated)
chr14	32594847	19.63	21.62	23.08	17.86	11.61	13.27	10.53	9.71	8.55	12.17	13.19	16	15.31	14.29	22.12	13.08	Intergenic
chr14	32643201	24.3	23.42	31.62	29.46	8.93	12.39	7.89	7.77	12.82	10.43	14.58	8	9.18	4.2	15.93	8.41	TSS	NM_001024604	Ankrd28	NM_001024604	ankyrin repeat domain 28
chr14	33420826	25.23	23.42	26.5	28.57	16.96	18.58	14.04	14.56	17.09	15.65	20.14	11	17.35	16.81	29.2	13.08	Gene body	NM_001001796	Prrxl1	NM_001001796	paired related homeobox protein-like 1
chr14	33421601	23.36	28.83	28.21	31.25	13.39	11.5	11.4	12.62	15.38	15.65	23.61	23	20.41	10.08	22.12	17.76	Gene body	NM_001001796	Prrxl1	NM_001001796	paired related homeobox protein-like 1
chr14	34027188	0	0.9	0.85	0	0	2.65	14.04	6.8	12.82	8.7	25	12	22.45	10.92	38.94	12.15	TSS	NM_153800	Arhgap22	NM_153800	Rho GTPase activating protein 22
chr14	34622588	37.38	43.24	33.33	30.36	17.86	18.58	12.28	17.48	11.97	20.87	16.67	21	23.47	23.53	23.89	14.02	3End	AK019667	AK019667		Mus musculus adult male testis cDNA, RIKEN full-length enriched library, clone:4930503F20 product:unclassifiable, full insert sequence.
chr14	35040043	55.14	56.76	58.12	38.39	8.04	17.7	15.79	14.56	17.95	24.35	27.78	22	14.29	24.37	22.12	18.69	Gene body	AK042641	Syt15	NM_176931	synaptotagmin XV isoform b
chr14	35157865	26.17	18.02	19.66	22.32	3.57	6.19	6.14	2.91	5.13	8.7	9.03	4	4.08	6.72	4.42	4.67	Gene body	NM_008133	Glud1	NM_008133	glutamate dehydrogenase 1
chr14	35187826	0.93	0.9	0	0.89	1.79	3.54	11.4	3.88	14.53	8.7	11.11	7	14.29	9.24	13.27	13.08	TSS	NM_011430	Sncg	NM_011430	synuclein, gamma
chr14	37514766	29.91	34.23	29.91	31.25	19.64	14.16	16.67	19.42	15.38	13.04	16.67	30	26.53	21.85	15.93	18.69	Intergenic
chr14	37733645	6.54	11.71	8.55	11.61	1.79	1.77	1.75	0.97	0.85	3.48	6.94	1	0	1.68	1.77	1.87	Gene body	NM_028407	Gcap14	NM_028407	granule cell antiserum positive 14 isoform 2
chr14	41965365	28.97	32.43	39.32	34.82	9.82	14.16	11.4	11.65	18.8	7.83	15.97	15	10.2	10.92	15.93	7.48	TSS	BC012245	Mbl1		Hypothetical protein.
chr14	44694096	2.8	1.8	5.13	2.68	15.18	18.58	15.79	18.45	32.48	18.26	15.28	14	15.31	32.77	22.12	12.15	Intergenic
chr14	45596254	13.08	14.41	11.97	9.82	4.46	4.42	3.51	5.83	5.13	5.22	5.56	4	4.08	9.24	11.5	5.61	3End	AK138521	AK138521		Mus musculus adult male testis cDNA, RIKEN full-length enriched library, clone:4931433C03 product:unclassifiable, full insert sequence.
chr14	46099196	9.35	11.71	12.82	13.39	1.79	6.19	2.63	6.8	3.42	6.09	2.08	5	3.06	3.36	3.54	3.74	Gene body	NM_146054	Plekhc1	NM_146054	pleckstrin homology domain containing, family C
chr14	46126980	21.5	22.52	17.95	17.86	31.25	36.28	33.33	33.01	35.9	24.35	25	17	22.45	15.97	21.24	18.69	Gene body	NM_146054	Plekhc1	NM_146054	pleckstrin homology domain containing, family C
chr14	46149437	19.63	21.62	20.51	27.68	10.71	12.39	9.65	8.74	8.55	11.3	13.89	16	6.12	8.4	27.43	8.41	TSS	NM_146054	Plekhc1	NM_146054	pleckstrin homology domain containing, family C
chr14	46149659	0.93	0	0	0.89	16.07	7.08	13.16	10.68	4.27	12.17	9.72	18	14.29	6.72	8.85	11.21	TSS	NM_146054	Plekhc1	NM_146054	pleckstrin homology domain containing, family C
chr14	46611764	32.71	25.23	23.93	28.57	3.57	7.96	4.39	2.91	6.84	13.04	11.81	3	5.1	8.4	5.31	3.74	Intergenic
chr14	47502032	6.54	3.6	2.56	2.68	41.07	21.24	29.82	33.98	13.68	25.22	16.67	22	21.43	4.2	2.65	36.45	TSS	NM_028966	Samd4	NM_028966	sterile alpha motif domain containing 4 isoform
chr14	47502972	0.93	3.6	0.85	1.79	29.46	10.62	26.32	20.39	14.53	26.96	8.33	12	14.29	15.13	2.65	34.58	TSS	NM_028966	Samd4	NM_028966	sterile alpha motif domain containing 4 isoform
chr14	47561052	0	0	0	0.89	7.14	10.62	8.77	3.88	8.55	14.78	11.11	3	21.43	15.13	7.08	8.41	Gene body	AK163751	Samd4	NM_028966	sterile alpha motif domain containing 4 isoform
chr14	48095246	21.5	14.41	15.38	18.75	2.68	2.65	4.39	4.85	4.27	9.57	11.11	7	3.06	5.88	3.54	3.74	Gene body	BC049155	Fbxo34		F-box only protein 34.
chr14	48974057	0	0	0	0	7.14	9.73	7.89	10.68	13.68	13.91	15.28	11	10.2	11.76	10.62	12.15	Intergenic
chr14	49041816	18.69	12.61	14.53	16.07	52.68	36.28	42.98	44.66	29.91	60	40.28	38	55.1	12.61	14.16	63.55	Intergenic
chr14	49135574	28.97	23.42	41.88	32.14	2.68	2.65	3.51	3.88	6.84	16.52	45.14	5	4.08	8.4	4.42	7.48	3End	AK031240	6720456H20Rik	NM_172600	hypothetical protein LOC218989
chr14	49291676	1.87	2.7	2.56	0.89	23.21	21.24	25.44	18.45	19.66	25.22	12.5	25	20.41	38.66	22.12	17.76	Gene body	AK042665	AK042665		Mus musculus 7 days neonate cerebellum cDNA, RIKEN full-length enriched library, clone:A730014E05 product:unclassifiable, full insert sequence.
chr14	49293749	11.21	13.51	16.24	16.07	25	21.24	16.67	25.24	23.08	17.39	44.44	39	38.78	38.66	43.36	60.75	Gene body	AK042665	AK042665		Mus musculus 7 days neonate cerebellum cDNA, RIKEN full-length enriched library, clone:A730014E05 product:unclassifiable, full insert sequence.
chr14	51516310	2.8	2.7	2.56	0.89	33.93	12.39	24.56	45.63	19.66	20	23.61	13	45.92	4.2	4.42	51.4	Intergenic
chr14	52358604	0	0	0	0	16.96	12.39	14.04	11.65	17.95	25.22	15.97	8	27.55	11.76	14.16	13.08	Intergenic
chr14	52503863	0	0	0.85	0	8.93	6.19	17.54	8.74	14.53	8.7	7.64	11	5.1	10.92	5.31	11.21	TSS	AK087101	Mett11d1	NM_001029990	D14Ertd209e protein
chr14	52530783	42.99	57.66	48.72	29.46	3.57	6.19	5.26	4.85	6.84	11.3	28.47	12	2.04	23.53	14.16	6.54	Gene body	NM_013864	Ndrg2	NM_013864	N-myc downstream regulated gene 2
chr14	52530982	39.25	40.54	52.14	39.29	4.46	7.96	4.39	9.71	6.84	9.57	22.92	12	2.04	10.92	11.5	6.54	Gene body	NM_013864	Ndrg2	NM_013864	N-myc downstream regulated gene 2
chr14	52531527	26.17	30.63	23.08	28.57	5.36	5.31	7.02	6.8	11.97	3.48	12.5	14	3.06	12.61	13.27	11.21	TSS	NM_013864	Ndrg2	NM_013864	N-myc downstream regulated gene 2
chr14	52531651	53.27	45.05	37.61	41.96	16.96	15.04	17.54	15.53	14.53	12.17	38.19	28	8.16	24.37	24.78	19.63	TSS	NM_013864	Ndrg2	NM_013864	N-myc downstream regulated gene 2
chr14	52560992	35.51	45.95	42.74	43.75	17.86	17.7	8.77	19.42	17.95	18.26	22.22	18	15.31	17.65	23.01	17.76	Intergenic
chr14	52605502	1.87	2.7	1.71	1.79	12.5	6.19	8.77	12.62	7.69	11.3	11.11	4	9.18	2.52	3.54	8.41	TSS	AK155659	mFLJ00128		Mus musculus 0 day neonate eyeball cDNA, RIKEN full-length enriched library, clone:E130112L23 product:similar to Human full-length cDNA 5-PRIME end of clone CS0DI001YE04 of placenta of Homo sapiens (Human) (Fragment) [Homo sapiens], full insert sequence.
chr14	55259992	4.67	3.6	4.27	3.57	56.25	18.58	45.61	41.75	29.91	38.26	36.11	38	45.92	8.4	6.19	64.49	TSS	NM_199470	Cdh24	NM_199470	cadherin-like 24
chr14	55482828	0	0	0	0	2.68	2.65	2.63	0	2.56	6.96	9.03	10	5.1	13.45	7.96	11.21	TSS	AY258064	Homez	NM_183174	homeodomain leucine zipper-encoding
chr14	55531648	1.87	0	0.85	0.89	36.61	38.94	50.88	30.1	35.04	41.74	22.22	44	64.29	42.86	47.79	56.07	TSS	AB012808	mboct		Mus musculus mRNA for mBOCT, complete cds.
chr14	55623296	4.67	5.41	7.69	4.46	26.79	25.66	23.68	17.48	18.8	21.74	21.53	22	10.2	12.61	21.24	19.63	Intergenic
chr14	55633947	0	0.9	0.85	0.89	11.61	14.16	12.28	12.62	20.51	8.7	18.06	13	15.31	11.76	15.93	17.76	TSS	NM_026890	Ngdn	NM_026890	neuroguidin, EIF4E binding protein
chr14	55635958	11.21	18.02	12.82	10.71	8.04	3.54	4.39	7.77	4.27	6.96	6.94	4	5.1	3.36	3.54	2.8	TSS	NM_026890	Ngdn	NM_026890	neuroguidin, EIF4E binding protein
chr14	55698668	29.91	15.32	24.79	20.54	0.89	2.65	2.63	4.85	3.42	8.7	13.19	7	0	9.24	3.54	4.67	Intergenic
chr14	55766162	48.6	45.95	52.14	41.96	20.54	20.35	12.28	20.39	19.66	21.74	16.67	23	8.16	27.73	24.78	23.36	Intergenic
chr14	56110378	71.96	67.57	69.23	74.11	119.64	99.12	116.67	119.42	112.82	126.09	106.25	130	124.49	84.03	76.99	128.97	TSS	NM_001024645	BC036313	NM_001024645	hypothetical protein LOC268747
chr14	56329814	16.82	12.61	15.38	16.07	5.36	7.96	4.39	3.88	5.13	6.09	4.17	4	4.08	5.04	7.08	7.48	Gene body	NM_019984	Tgm1	NM_019984	transglutaminase 1, K polypeptide
chr14	56334050	19.63	16.22	18.8	18.75	11.61	7.96	16.67	22.33	11.97	6.96	14.58	10	9.18	9.24	12.39	10.28	3End	AK002625	Rabggta	NM_019519	Rab geranylgeranyl transferase, a subunit
chr14	56386715	0.93	0.9	0.85	0	13.39	4.42	10.53	7.77	7.69	6.09	2.08	5	11.22	5.04	5.31	12.15	TSS	NM_008519	Ltb4r1	NM_008519	leukotriene B4 receptor 1
chr14	56516795	20.56	17.12	14.53	16.07	7.14	7.08	3.51	3.88	5.13	4.35	15.97	8	4.08	9.24	4.42	14.02	Gene body	NM_001082975	2310014G06Rik	NM_001082975	hypothetical protein LOC654795
chr14	57190254	24.3	31.53	31.62	30.36	6.25	10.62	13.16	10.68	11.11	7.83	9.72	11	11.22	19.33	28.32	3.74	TSS	NM_001014996	Cenpj	NM_001014996	centromere protein J
chr14	57504841	0	0.9	0	0.89	12.5	3.54	9.65	10.68	6.84	6.96	5.56	11	9.18	3.36	4.42	21.5	TSS	BC046507	Zmym2		Zmym2 protein.
chr14	57653196	28.97	29.73	24.79	25	34.82	46.02	32.46	40.78	49.57	41.74	36.11	36	46.94	44.54	49.56	46.73	3End	AY390399	Gja3	NM_016975	gap junction membrane channel protein alpha 3
chr14	59089630	17.76	22.52	22.22	23.21	8.04	7.96	7.89	10.68	5.98	7.83	14.58	7	23.47	15.97	11.5	14.02	Intergenic
chr14	59328771	19.63	13.51	26.5	17.86	2.68	3.54	5.26	3.88	6.84	17.39	11.81	4	10.2	6.72	7.08	4.67	Intergenic
chr14	60171894	23.36	32.43	41.88	37.5	6.25	6.19	6.14	5.83	8.55	13.04	25.69	14	8.16	14.29	17.7	12.15	Intergenic
chr14	60216513	21.5	24.32	29.91	26.79	12.5	14.16	11.4	14.56	11.11	8.7	14.58	21	19.39	28.57	35.4	22.43	TSS	NM_027986	Cdadc1	NM_027986	cytidine and dCMP deaminase domain containing 1
chr14	61301534	20.56	17.12	23.08	20.54	8.04	10.62	9.65	8.74	7.69	8.7	7.64	14	5.1	11.76	19.47	11.21	Intergenic
chr14	61528723	28.97	30.63	30.77	21.43	4.46	2.65	4.39	5.83	6.84	16.52	11.81	4	0	7.56	7.96	3.74	Intergenic
chr14	61532610	19.63	20.72	20.51	24.11	12.5	11.5	7.89	11.65	10.26	22.61	20.14	5	12.24	9.24	9.73	9.35	Intergenic
chr14	61627105	12.15	14.41	11.11	10.71	4.46	3.54	1.75	1.94	0	6.09	6.25	6	5.1	5.04	4.42	3.74	Gene body	AF167554	Tnfrsf19	NM_013869	tumor necrosis factor receptor superfamily,
chr14	61656376	75.7	81.08	69.23	68.75	137.5	119.47	114.04	103.88	140.17	113.91	88.89	76	103.06	91.6	86.73	105.61	TSS	AF167552	Tnfrsf19	NM_013869	tumor necrosis factor receptor superfamily,
chr14	62301422	2.8	1.8	1.71	0.89	8.93	7.08	13.16	9.71	12.82	13.04	6.94	8	7.14	1.68	0	7.48	TSS	AK139063	AK139063		Mus musculus Dleu2 mRNA, partial sequence, alternatively spliced.
chr14	62313658	11.21	10.81	12.82	16.07	2.68	2.65	2.63	0.97	1.71	5.22	8.33	1	1.02	5.88	4.42	4.67	Intergenic
chr14	62867510	65.42	51.35	46.15	35.71	7.14	7.08	8.77	11.65	9.4	64.35	32.64	11	5.1	6.72	8.85	11.21	Intergenic
chr14	63174476	0	0	0.85	0.89	15.18	7.08	8.77	3.88	14.53	11.3	6.25	8	14.29	1.68	0	11.21	Intergenic
chr14	63726395	33.64	37.84	39.32	29.46	8.93	5.31	4.39	7.77	7.69	4.35	11.81	7	3.06	16.81	19.47	5.61	Intergenic
chr14	63748529	9.35	11.71	10.26	7.14	6.25	3.54	3.51	5.83	9.4	8.7	4.17	3	2.04	2.52	2.65	0.93	Gene body	NM_007798	Ctsb	NM_007798	cathepsin B preproprotein
chr14	63809842	16.82	16.22	17.95	19.64	27.68	25.66	30.7	34.95	28.21	28.7	31.25	30	21.43	24.37	33.63	39.25	Gene body	BC115762	Neil2	NM_201610	nei like 2
chr14	63812862	84.11	81.08	83.76	86.61	105.36	113.27	102.63	116.5	109.4	127.83	105.56	113	101.02	79.83	112.39	88.79	TSS	BC115709	Neil2		Neil2 protein (Fragment).
chr14	63851619	14.95	15.32	21.37	25	5.36	4.42	4.39	2.91	6.84	9.57	10.42	6	4.08	5.88	9.73	7.48	Intergenic
chr14	63859898	18.69	15.32	20.51	16.96	8.93	11.5	8.77	7.77	10.26	7.83	13.19	15	8.16	9.24	16.81	13.08	Gene body	DQ436912	Gata4	NM_008092	GATA binding protein 4
chr14	63859961	11.21	15.32	11.11	15.18	2.68	7.08	3.51	0	7.69	3.48	3.47	4	4.08	3.36	5.31	4.67	Gene body	DQ436912	Gata4	NM_008092	GATA binding protein 4
chr14	63866378	49.53	51.35	38.46	48.21	26.79	28.32	21.93	24.27	21.37	14.78	20.83	28	15.31	25.21	28.32	10.28	TSS	AB075549	Gata4	NM_008092	GATA binding protein 4
chr14	64224947	37.38	31.53	33.33	37.5	18.75	22.12	17.54	21.36	17.95	15.65	24.31	35	32.65	30.25	20.35	28.04	TSS	AY534252	Xkr6		XK-related protein 6 (Fragment).
chr14	64479376	1.87	1.8	1.71	1.79	12.5	12.39	21.93	23.3	13.68	15.65	6.25	23	18.37	0.84	1.77	3.74	TSS	NM_028228	2610028A01Rik	NM_028228	PIN2/TRF1-interacting protein
chr14	64485831	11.21	6.31	11.11	9.82	0.89	0.88	0	0.97	0.85	3.48	9.03	2	1.02	6.72	1.77	1.87	Gene body	NM_028228	2610028A01Rik	NM_028228	PIN2/TRF1-interacting protein
chr14	65271239	3.74	2.7	1.71	1.79	16.07	11.5	11.4	21.36	8.55	18.26	12.5	18	22.45	5.04	5.31	9.35	TSS	NM_001081177	Kif13b	NM_001081177	kinesin family member 13B
chr14	65598994	14.95	16.22	15.38	19.64	7.14	7.96	7.02	5.83	4.27	9.57	11.81	2	5.1	10.92	7.96	4.67	Gene body	NM_153414	Ints9	NM_153414	cDNA sequence BC028953
chr14	65885713	33.64	30.63	29.06	27.68	49.11	57.52	49.12	47.57	52.14	42.61	44.44	43	38.78	39.5	46.9	53.27	TSS	BC086690	Fbxo16	NM_015795	F-box protein 16
chr14	65950468	62.62	43.24	50.43	50	17.86	13.27	19.3	18.45	19.66	18.26	22.22	16	6.12	38.66	31.86	13.08	Gene body	AK028094	AK028094		Mus musculus adult male testis cDNA, RIKEN full-length enriched library, clone:1700102D20 product:unclassifiable, full insert sequence.
chr14	66338251	11.21	6.31	7.69	9.82	0.89	1.77	2.63	0.97	0.85	8.7	5.56	1	4.08	5.88	1.77	0	Gene body	AK033154	Scara5	NM_028903	scavenger receptor class A, member 5
chr14	66378373	33.64	28.83	35.04	26.79	7.14	21.24	26.32	14.56	11.11	43.48	26.39	12	16.33	17.65	14.16	13.08	Gene body	NM_028903	Scara5	NM_028903	scavenger receptor class A, member 5
chr14	67482182	26.17	19.82	23.08	22.32	11.61	12.39	10.53	9.71	13.68	6.96	12.5	19	10.2	13.45	23.01	16.82	Gene body	NM_009955	Dpysl2	NM_009955	dihydropyrimidinase-like 2
chr14	67856407	18.69	27.93	20.51	16.07	77.68	57.52	84.21	88.35	74.36	84.35	64.58	57	87.76	23.53	24.78	78.5	Gene body	U92703	Ebf2	NM_010095	early B-cell factor 2
chr14	68089558	0	0	0	0	12.5	15.93	8.77	7.77	18.8	6.96	13.89	12	13.27	12.61	26.55	10.28	Intergenic
chr14	70107404	0	0.9	0	0	12.5	7.08	10.53	9.71	7.69	9.57	2.78	2	8.16	0	0.88	6.54	TSS	AK032854	R3hcc1		12 days embryo male wolffian duct includes surrounding region cDNA, RIKEN full-length enriched library, clone:6720463B14 product:weakly similar to hypothetical protein DKFZp564N123.1 (Activated spleen cDNA, RIKEN full-length enriched library, clone:F83010
chr14	70354514	7.48	8.11	9.4	12.5	2.68	3.54	1.75	2.91	4.27	3.48	7.64	3	1.02	2.52	1.77	2.8	Intergenic
chr14	70530733	17.76	19.82	21.37	17.86	36.61	28.32	28.95	31.07	28.21	28.7	33.33	37	34.69	50.42	30.09	33.64	Intergenic
chr14	70559088	22.43	18.92	19.66	21.43	11.61	9.73	9.65	9.71	11.97	6.09	13.89	24	10.2	14.29	29.2	13.08	TSS	AK132259	9930012K11Rik	NM_001004155	hypothetical protein LOC268759
chr14	70576626	57.01	56.76	56.41	48.21	97.32	94.69	91.23	114.56	85.47	100	70.83	69	97.96	61.34	61.06	89.72	TSS	NM_145978	Pdlim2	NM_145978	PDZ and LIM domain 2
chr14	70709935	13.08	12.61	32.48	16.07	5.36	2.65	0.88	2.91	2.56	13.04	15.97	2	2.04	0.84	0	0.93	Intergenic
chr14	70731263	42.99	38.74	41.03	40.18	8.04	7.08	5.26	8.74	7.69	13.04	25	21	1.02	6.72	10.62	1.87	Gene body	AK050076	fad123		Mus musculus fad123 mRNA for FAD123, complete cds.
chr14	70752058	35.51	16.22	18.8	21.43	1.79	3.54	2.63	3.88	1.71	2.61	21.53	5	1.02	6.72	3.54	1.87	TSS	AK158096	fad123		Mus musculus fad123 mRNA for FAD123, complete cds.
chr14	70787622	11.21	9.91	9.4	8.93	1.79	0.88	1.75	3.88	3.42	3.48	1.39	1	2.04	2.52	1.77	0.93	Gene body	NM_021308	Piwil2	NM_021308	piwi like homolog 2
chr14	70905549	36.45	30.63	40.17	33.04	10.71	13.27	17.54	10.68	13.68	13.91	31.25	16	5.1	21.01	19.47	16.82	Gene body	AK147534	mKIAA4159		Mus musculus adult male liver cDNA, RIKEN full-length enriched library, clone:1300013K14 product:bone morphogenetic protein 1, full insert sequence.
chr14	70906452	19.63	12.61	23.08	15.18	1.79	0.88	1.75	3.88	0.85	4.35	13.89	11	3.06	3.36	7.08	3.74	Gene body	AK147534	mKIAA4159		Mus musculus adult male liver cDNA, RIKEN full-length enriched library, clone:1300013K14 product:bone morphogenetic protein 1, full insert sequence.
chr14	70920533	21.5	23.42	26.5	22.32	10.71	11.5	14.91	12.62	14.53	19.13	8.33	16	7.14	10.08	25.66	6.54	3End	NM_011359	Sftpc	NM_011359	surfactant associated protein C
chr14	70940606	37.38	32.43	29.06	30.36	70.54	59.29	91.23	86.41	58.97	56.52	61.11	82	54.08	63.87	38.94	85.05	3End	NM_145219	Lgi3	NM_145219	leucine-rich repeat LGI family, member 3
chr14	70951533	14.95	9.91	11.97	10.71	5.36	5.31	2.63	3.88	4.27	6.09	9.03	6	4.08	4.2	9.73	3.74	TSS	NM_021877	Hr	NM_021877	hairless protein
chr14	73543233	0	0	0.85	0	16.96	14.16	15.79	13.59	17.95	13.04	18.75	25	16.33	17.65	15.04	10.28	TSS	AK013540	Rcbtb2	NM_134083	chromosome condensation 1-like
chr14	73572465	77.57	45.05	64.96	58.04	18.75	15.04	20.18	12.62	18.8	35.65	47.22	35	16.33	33.61	34.51	14.02	TSS	AK217036	Rcbtb2		Mus musculus adult male hippocampus cDNA, RIKEN full-length enriched library, clone:2900016J09 product:SIMILAR TO CHROMOSOME CONDENSATION 1-LIKE homolog [Mus musculus], full insert sequence.
chr14	74030758	45.79	21.62	28.21	19.64	3.57	1.77	2.63	4.85	4.27	31.3	29.86	17	2.04	13.45	8.85	3.74	Intergenic
chr14	75865918	31.78	36.94	34.19	30.36	12.5	14.16	16.67	19.42	13.68	8.7	23.61	21	29.59	21.85	28.32	14.95	Intergenic
chr14	76510411	16.82	16.22	16.24	11.61	9.82	7.96	18.42	9.71	11.97	10.43	8.33	5	5.1	3.36	4.42	5.61	TSS	NM_026177	1200011I18Rik	NM_026177	hypothetical protein LOC67467
chr14	76998536	79.44	71.17	82.05	71.43	132.14	115.04	132.46	139.81	125.64	153.04	105.56	105	147.96	95.8	96.46	135.51	Intergenic
chr14	77245693	31.78	54.05	50.43	37.5	5.36	11.5	11.4	10.68	12.82	19.13	19.44	11	5.1	14.29	13.27	7.48	Intergenic
chr14	78936367	12.15	11.71	10.26	14.29	25.89	20.35	31.58	26.21	23.08	24.35	11.11	15	12.24	15.97	17.7	34.58	TSS	AK158300	AK158300		Mus musculus adult inner ear cDNA, RIKEN full-length enriched library, clone:F930102B02 product:similar to A-kinase anchor protein 11 (Protein kinase A anchoring protein 11) (PRKA11) (A kinase anchor protein 220 kDa) (AKAP 220) (hAKAP220) [Homo sapiens],
chr14	79322002	15.89	13.51	21.37	12.5	0.89	0.88	2.63	0.97	3.42	4.35	6.25	1	3.06	1.68	3.54	0	Gene body	AK033642	1300010F03Rik		Adult male cecum cDNA, RIKEN full-length enriched library, clone:9130206H04 product:hypothetical P-loop containing nucleotide triphosphate hydrolases structure containing protein, full insert sequence.
chr14	79790200	8.41	12.61	6.84	7.14	32.14	30.09	37.72	23.3	46.15	25.22	26.39	24	28.57	16.81	12.39	31.78	TSS	NM_025832	Narg1l	NM_025832	NMDA receptor regulated 1-like
chr14	79881426	0	0.9	0	0	9.82	7.96	11.4	3.88	15.38	9.57	3.47	7	2.04	9.24	0.88	9.35	TSS	NM_018765	Wbp4	NM_018765	WW domain binding protein 4
chr14	84846039	49.53	51.35	47.01	44.64	55.36	52.21	48.25	62.14	54.7	51.3	46.53	75	76.53	79.83	82.3	88.79	TSS	NM_001013753	Pcdh17	NM_001013753	protocadherin 17
chr14	84847917	44.86	45.05	47.86	46.43	30.36	29.2	34.21	31.07	34.19	26.96	30.56	31	30.61	26.89	48.67	22.43	Gene body	NM_001013753	Pcdh17	NM_001013753	protocadherin 17
chr14	85387730	12.15	9.91	11.97	16.96	5.36	5.31	1.75	3.88	4.27	7.83	4.86	2	5.1	4.2	3.54	3.74	Intergenic
chr14	86889480	41.12	34.23	38.46	39.29	13.39	9.73	18.42	19.42	19.66	51.3	30.56	16	14.29	15.97	18.58	13.08	Intergenic
chr14	87676696	22.43	26.13	26.5	25	11.61	14.16	11.4	16.5	12.82	20	20.83	16	19.39	17.65	21.24	14.95	Intergenic
chr14	88528724	19.63	21.62	21.37	20.54	9.82	7.08	7.02	7.77	5.98	12.17	14.58	10	14.29	9.24	15.04	4.67	Intergenic
chr14	88818316	0	0	0	0	7.14	5.31	6.14	10.68	8.55	14.78	12.5	8	13.27	13.45	12.39	13.08	Intergenic
chr14	90047787	33.64	39.64	47.01	35.71	16.96	13.27	14.91	14.56	19.66	14.78	18.75	23	29.59	15.97	27.43	14.02	Intergenic
chr14	98999506	14.95	3.6	10.26	8.04	8.04	4.42	7.02	8.74	7.69	11.3	8.33	14	25.51	21.01	23.01	23.36	Intergenic
chr14	99181832	4.67	16.22	7.69	11.61	11.61	20.35	11.4	17.48	13.68	9.57	13.89	5	4.08	3.36	6.19	6.54	Intergenic
chr14	100685510	54.21	40.54	47.86	45.54	25	23.89	21.93	17.48	25.64	19.13	27.08	37	17.35	65.55	51.33	12.15	Intergenic
chr14	102128521	11.21	10.81	10.26	8.04	36.61	24.78	41.23	32.04	23.08	48.7	19.44	22	45.92	10.08	15.93	22.43	TSS	NM_201529	Lmo7	NM_201529	LIM domain only 7
chr14	102315284	19.63	4.5	5.98	8.04	12.5	18.58	16.67	12.62	19.66	16.52	5.56	7	8.16	5.04	7.96	5.61	Intergenic
chr14	102986498	27.1	25.23	31.62	33.93	11.61	15.04	13.16	12.62	18.8	13.04	29.86	10	20.41	18.49	22.12	14.95	Intergenic
chr14	104865070	4.67	4.5	3.42	3.57	17.86	12.39	15.79	12.62	8.55	11.3	8.33	14	29.59	6.72	7.08	17.76	Gene body	NM_011143	Pou4f1	NM_011143	POU domain, class 4, transcription factor 1
chr14	105882317	0.93	1.8	2.56	1.79	6.25	12.39	1.75	4.85	11.11	9.57	8.33	6	15.31	8.4	10.62	8.41	Intergenic
chr14	108816566	12.15	17.12	13.68	12.5	8.04	5.31	6.14	5.83	6.84	12.17	15.97	7	19.39	15.13	12.39	8.41	Intergenic
chr14	111178515	7.48	10.81	10.26	9.82	1.79	2.65	3.51	2.91	1.71	6.96	5.56	3	1.02	0.84	3.54	3.74	Intergenic
chr14	111772471	7.48	10.81	6.84	6.25	2.68	2.65	4.39	3.88	6.84	5.22	0.69	0	0	0	0	0	Intergenic
chr14	112079877	46.73	31.53	57.26	34.82	23.21	17.7	18.42	20.39	22.22	33.91	50	31	35.71	31.09	37.17	35.51	Gene body	NM_029273	Slitrk5	NM_029273	SLIT and NTRK-like family, member 5 isoform 1
chr14	118836257	0.93	0	0	0	12.5	3.54	9.65	6.8	5.98	6.96	1.39	2	7.14	0.84	1.77	9.35	Intergenic
chr14	118873129	2.8	3.6	1.71	2.68	23.21	12.39	16.67	12.62	17.95	20.87	15.28	16	36.73	2.52	0	25.23	Intergenic
chr14	119105547	6.54	9.91	6.84	6.25	35.71	16.81	29.82	28.16	21.37	26.96	28.47	21	23.47	5.88	6.19	57.01	TSS	NM_001033336	Abcc4	NM_001033336	ATP-binding cassette, sub-family C (CFTR/MRP),
chr14	119106046	85.05	63.96	82.91	63.39	26.79	26.55	28.07	25.24	35.9	27.83	32.64	43	16.33	26.05	46.9	24.3	TSS	NM_001033336	Abcc4	NM_001033336	ATP-binding cassette, sub-family C (CFTR/MRP),
chr14	119115660	13.08	10.81	21.37	18.75	1.79	0	1.75	0	0.85	6.09	6.25	1	0	4.2	2.65	0.93	Intergenic
chr14	119216170	40.19	41.44	36.75	44.64	23.21	28.32	21.05	25.24	19.66	32.17	27.78	25	40.82	33.61	41.59	33.64	Gene body	NM_023878	Cldn10	NM_023878	claudin 10 isoform a
chr14	119537619	24.3	28.83	25.64	25	28.57	33.63	21.93	32.04	28.21	30.43	30.56	36	43.88	47.06	38.05	46.73	TSS	NM_015820	Hs6st3	NM_015820	heparan sulfate 6-O-sulfotransferase 3
chr14	121115928	23.36	17.12	18.8	15.18	9.82	7.08	7.02	5.83	6.84	19.13	20.14	13	11.22	15.97	12.39	8.41	Intergenic
chr14	121245504	43.93	28.83	33.33	38.39	9.82	15.04	9.65	8.74	11.97	9.57	28.47	10	8.16	19.33	18.58	10.28	Intergenic
chr14	121309745	77.57	63.06	65.81	69.64	119.64	113.27	94.74	106.8	103.42	116.52	113.89	132	88.78	78.15	92.92	148.6	TSS	AK017701	Ranbp5		Mus musculus Ran binding protein 5 mRNA, partial cds.
chr14	121348708	6.54	10.81	13.68	7.14	0.89	0	0.88	0.97	0.85	3.48	1.39	0	0	1.68	0	1.87	3End	NM_023579	Ranbp5	NM_023579	RAN binding protein 5
chr14	121737860	13.08	10.81	13.68	15.18	5.36	2.65	5.26	4.85	3.42	10.43	6.94	4	3.06	2.52	2.65	3.74	Gene body	NM_145465	Stk24	NM_145465	serine/threonine protein kinase 24
chr14	121777680	0	0	0	0	16.07	25.66	14.04	19.42	18.8	17.39	21.53	19	8.16	10.08	33.63	15.89	TSS	NM_145465	Stk24	NM_145465	serine/threonine protein kinase 24
chr14	121821479	0.93	0.9	0	0	4.46	6.19	3.51	4.85	4.27	3.48	16.67	8	13.27	10.08	6.19	4.67	Intergenic
chr14	121870859	42.99	29.73	42.74	33.93	10.71	16.81	13.16	9.71	17.95	32.17	17.36	10	8.16	7.56	15.93	14.95	Gene body	AK085471	Slc15a1	NM_053079	solute carrier family 15 (oligopeptide
chr14	121904772	2.8	3.6	3.42	1.79	14.29	18.58	14.04	20.39	21.37	23.48	20.14	20	14.29	12.61	15.93	13.08	TSS	NM_053079	Slc15a1	NM_053079	solute carrier family 15 (oligopeptide
chr14	122123752	11.21	10.81	13.68	8.93	4.46	2.65	2.63	3.88	2.56	7.83	10.42	2	1.02	9.24	3.54	3.74	Gene body	AK122431	Dock9	NM_001081039	dedicator of cytokinesis 9
chr14	124026052	14.02	11.71	9.4	13.39	44.64	32.74	40.35	41.75	29.91	46.96	21.53	22	60.2	13.45	4.42	42.06	TSS	NM_177393	Nalcn	NM_177393	voltage gated channel like 1
chr15	5058293	55.14	30.63	29.06	25	39.29	59.29	54.39	60.19	49.57	40	35.42	32	21.43	24.37	25.66	21.5	TSS	AK052796	Card6		10 days lactation, adult female mammary gland cDNA, RIKEN full-length enriched library, clone:D730008L15 product:weakly similar to CASPASE RECRUITMENT DOMAIN PROTEIN 6 (Fragment).
chr15	5094284	0	0	0.85	0	7.14	12.39	15.79	4.85	15.38	13.04	2.78	0	6.12	12.61	0.88	11.21	TSS	NM_001013367	Prkaa1	NM_001013367	protein kinase, AMP-activated, alpha 1 catalytic
chr15	6394682	26.17	21.62	23.93	27.68	3.57	3.54	2.63	2.91	3.42	18.26	19.44	0	3.06	8.4	2.65	4.67	TSS	NM_013485	C9	NM_013485	complement component 9
chr15	6396939	17.76	13.51	16.24	16.07	0.89	0.88	0.88	2.91	0.85	3.48	8.33	3	2.04	4.2	4.42	4.67	TSS	NM_013485	C9	NM_013485	complement component 9
chr15	6521118	7.48	23.42	9.4	16.96	21.43	16.81	15.79	21.36	22.22	13.04	7.64	8	6.12	5.88	7.96	9.35	Intergenic
chr15	7109800	36.45	36.04	28.21	26.79	4.46	3.54	9.65	4.85	8.55	5.22	22.22	8	3.06	10.08	14.16	5.61	Gene body	S73496	Lifr		Mus musculus 13 days pregnant adult female placenta cDNA, RIKEN full-length enriched library, clone:I530009I08 product:leukemia inhibitory factor receptor, full insert sequence.
chr15	9012682	41.12	45.95	64.1	42.86	20.54	15.93	9.65	10.68	14.53	14.78	17.36	15	14.29	10.92	34.51	18.69	Gene body	NM_001040395	1110020G09Rik	NM_001040395	hypothetical protein LOC68646 isoform 2
chr15	9206719	18.69	9.01	16.24	12.5	0	0.88	0.88	0	1.71	10.43	7.64	0	2.04	0.84	1.77	0.93	TSS	NM_207216	Ugt3a1	NM_207216	UDP glycosyltransferases 3 family, polypeptide
chr15	10156451	24.3	15.32	23.08	22.32	2.68	4.42	7.02	4.85	1.71	6.09	9.72	3	2.04	5.88	5.31	3.74	Gene body	AK052679	Prlr	NM_011169	prolactin receptor
chr15	10232622	18.69	14.41	21.37	26.79	4.46	2.65	6.14	4.85	3.42	9.57	9.72	5	5.1	5.04	7.08	4.67	Gene body	AK081676	Prlr		Mus musculus 3 days neonate thymus cDNA, RIKEN full-length enriched library, clone:A630063N04 product:prolactin receptor, full insert sequence.
chr15	10400085	0	0	0	0	5.36	7.96	7.02	5.83	11.11	6.09	1.39	2	1.02	5.88	0	5.61	TSS	AK140224	AK140224		Mus musculus ES cells cDNA, RIKEN full-length enriched library, clone:C330022M23 product:unclassifiable, full insert sequence.
chr15	10561872	18.69	17.12	26.5	22.32	0.89	0.88	1.75	1.94	4.27	18.26	18.75	1	0	2.52	1.77	5.61	Intergenic
chr15	10643834	46.73	36.94	38.46	36.61	49.11	52.21	56.14	50.49	56.41	46.96	43.06	80	67.35	67.23	60.18	76.64	TSS	AK160119	Rai14	NM_030690	ankycorbin
chr15	11896630	19.63	20.72	24.79	26.79	8.04	11.5	6.14	6.8	9.4	6.09	7.64	15	7.14	21.85	18.58	11.21	Gene body	BC027576	BC027576		Mus musculus adult male testis cDNA, RIKEN full-length enriched library, clone:1700047G03 product:unclassifiable, full insert sequence.
chr15	14314963	16.82	16.22	13.68	13.39	7.14	5.31	7.02	7.77	8.55	4.35	19.44	9	12.24	10.08	16.81	13.08	Intergenic
chr15	19400511	9.35	15.32	12.82	12.5	4.46	3.54	2.63	2.91	3.42	13.04	4.86	2	8.16	6.72	4.42	0.93	Intergenic
chr15	21233317	9.35	9.91	4.27	5.36	0	0	0.88	0	1.71	6.96	9.72	21	16.33	13.45	6.19	4.67	Gene body	NM_001008420	Cdh12	NM_001008420	cadherin 12
chr15	22301197	13.08	13.51	10.26	7.14	0	0	0	0.97	0.85	5.22	15.97	8	16.33	10.08	7.08	11.21	Intergenic
chr15	23050205	6.54	2.7	5.98	2.68	0	0	0	0	0	12.17	13.19	14	7.14	9.24	5.31	9.35	Gene body	NM_001081299	Cdh18	NM_001081299	cadherin 18
chr15	25199008	16.82	17.12	21.37	19.64	0	0	0.88	0	0.85	22.61	15.28	27	54.08	14.29	15.04	11.21	Intergenic
chr15	25259946	14.95	10.81	9.4	10.71	2.68	1.77	4.39	5.83	4.27	3.48	6.25	3	5.1	4.2	2.65	2.8	Gene body	BC100491	BC100491		Mus musculus adult male testis cDNA, RIKEN full-length enriched library, clone:4930445E18 product:unclassifiable, full insert sequence.
chr15	25398401	11.21	12.61	11.97	13.39	0	0	0	0	0	9.57	3.47	18	20.41	10.08	11.5	4.67	Intergenic
chr15	25399244	11.21	16.22	5.98	8.93	0	0.88	0	0	0	10.43	11.11	16	22.45	11.76	15.04	9.35	Intergenic
chr15	25519141	14.02	8.11	12.82	15.18	0	0.88	0.88	0.97	0.85	0	0	1	1.02	3.36	0	0.93	Intergenic
chr15	25587711	0	0.9	5.98	4.46	0	1.77	0	0.97	0	9.57	5.56	9	6.12	7.56	11.5	10.28	Gene body	AK028552	Myo10	NM_019472	myosin X
chr15	25589118	6.54	9.91	12.82	9.82	0	0	1.75	0.97	0.85	5.22	10.42	16	10.2	12.61	5.31	7.48	Gene body	AK028552	Myo10	NM_019472	myosin X
chr15	25623660	21.5	21.62	23.93	21.43	39.29	50.44	43.86	45.63	52.99	16.52	25	0	0	21.01	26.55	32.71	Gene body	AK089482	myo 10		Mus musculus partial mRNA for myosin X (myo 10 gene).
chr15	25643687	14.02	9.01	12.82	12.5	0	0	0	0	0	8.7	4.86	34	15.31	5.04	7.96	7.48	Intergenic
chr15	25644072	20.56	18.02	15.38	18.75	41.07	33.63	28.95	33.98	34.19	20.87	23.61	33	24.49	28.57	24.78	45.79	Intergenic
chr15	25644103	14.02	12.61	11.11	15.18	0.89	2.65	1.75	0.97	1.71	5.22	6.25	6	3.06	3.36	4.42	3.74	Intergenic
chr15	25688804	10.28	8.11	4.27	12.5	0	0	0	0	0	15.65	13.89	18	16.33	16.81	12.39	5.61	Gene body	AK161653	myo 10		Mus musculus partial mRNA for myosin X (myo 10 gene).
chr15	25731672	2.8	3.6	1.71	5.36	0	0	0	0.97	0	10.43	2.08	8	7.14	5.88	8.85	6.54	Gene body	AK122371	Myo10	NM_019472	myosin X
chr15	25914332	0.93	0.9	0	0	10.71	5.31	7.02	13.59	6.84	4.35	4.17	6	6.12	0	0.88	16.82	TSS	AK170489	Zfp622	NM_144523	zinc finger protein 622
chr15	26825784	45.79	47.75	58.12	47.32	20.54	25.66	31.58	27.18	23.08	24.35	34.72	27	29.59	37.82	58.41	22.43	TSS	NM_176959	Fbxl7	NM_176959	F-box and leucine-rich repeat protein 7
chr15	27339751	16.82	20.72	18.8	14.29	4.46	2.65	2.63	3.88	5.13	6.96	5.56	2	1.02	10.08	6.19	2.8	Intergenic
chr15	27387802	8.41	7.21	11.97	8.04	0.89	0.88	0	0.97	1.71	3.48	8.33	0	2.04	4.2	1.77	3.74	Intergenic
chr15	27560948	40.19	41.44	35.04	41.96	46.43	42.48	44.74	45.63	41.88	40	38.19	30	26.53	27.73	24.78	25.23	TSS	AK134955	Fam105b		Protein FAM105B.
chr15	27589466	24.3	28.83	34.19	38.39	8.93	12.39	7.89	9.71	13.68	13.04	13.19	7	19.39	18.49	30.97	12.15	Gene body	AK152120	BC052328	NM_198301	hypothetical protein LOC223433
chr15	27850729	10.28	17.12	11.11	10.71	2.68	3.54	3.51	2.91	0.85	2.61	6.25	3	2.04	3.36	4.42	3.74	Intergenic
chr15	31184542	10.28	11.71	5.98	7.14	0	0	2.63	0.97	0	2.61	9.72	1	0	1.68	0	0	Gene body	NM_146057	Dap	NM_146057	death-associated protein
chr15	31184913	19.63	15.32	20.51	18.75	5.36	5.31	8.77	3.88	4.27	5.22	13.89	6	3.06	10.08	8.85	13.08	Gene body	NM_146057	Dap	NM_146057	death-associated protein
chr15	31348019	24.3	23.42	24.79	28.57	14.29	12.39	10.53	11.65	15.38	6.96	13.19	13	8.16	13.45	19.47	8.41	Intergenic
chr15	32950381	14.02	20.72	23.08	19.64	5.36	5.31	2.63	5.83	5.98	15.65	7.64	6	8.16	3.36	7.96	2.8	Gene body	NM_008304	Sdc2	NM_008304	syndecan 2
chr15	34012958	0	0	0	0.89	4.46	7.08	10.53	3.88	12.82	10.43	2.08	0	0	10.92	0	13.08	TSS	NM_026002	Mtdh	NM_026002	LYRIC
chr15	34373114	0.93	1.8	0.85	0.89	13.39	6.19	8.77	13.59	7.69	9.57	5.56	4	9.18	0.84	0	8.41	TSS	AK137031	Rpl30	NM_009083	ribosomal protein L30
chr15	35222856	0.93	0.9	0	0.89	13.39	9.73	14.04	8.74	17.09	14.78	2.78	2	0	11.76	1.77	9.35	Intergenic
chr15	36136279	19.63	16.22	22.22	16.96	5.36	7.96	6.14	4.85	5.98	10.43	11.11	2	1.02	8.4	5.31	1.87	Intergenic
chr15	36577890	28.04	35.14	31.62	30.36	16.96	17.7	12.28	17.48	18.8	15.65	23.61	14	27.55	19.33	15.93	14.95	Intergenic
chr15	36610657	14.95	13.51	19.66	16.96	3.57	4.42	3.51	1.94	5.13	13.91	8.33	7	2.04	4.2	5.31	0	Intergenic
chr15	36741134	42.06	28.83	48.72	48.21	5.36	15.04	11.4	8.74	15.38	19.13	20.83	10	10.2	8.4	10.62	6.54	Intergenic
chr15	36905684	13.08	12.61	10.26	11.61	1.79	1.77	1.75	2.91	3.42	5.22	5.56	5	1.02	2.52	6.19	2.8	Intergenic
chr15	37163388	0	0	0.85	0	8.93	11.5	7.89	9.71	10.26	8.7	8.33	10	15.31	13.45	12.39	8.41	TSS	NM_026496	Grhl2	NM_026496	transcription factor CP2-like 3
chr15	37447043	9.35	11.71	12.82	17.86	1.79	0.88	1.75	2.91	2.56	0.87	3.47	2	2.04	4.2	4.42	1.87	Intergenic
chr15	38008061	0.93	0.9	0	0	15.18	8.85	16.67	10.68	11.97	5.22	7.64	3	2.04	15.13	2.65	14.02	TSS	NM_001081359	Ubr5	NM_001081359	extraembryonic development protein
chr15	38508277	20.56	19.82	23.93	24.11	23.21	26.55	20.18	21.36	23.93	28.7	22.22	33	34.69	37.82	35.4	34.58	Intergenic
chr15	38591859	57.94	55.86	54.7	60.71	24.11	28.32	18.42	23.3	27.35	17.39	38.89	28	17.35	49.58	56.64	42.06	TSS	NM_025494	Atp6v1c1	NM_025494	ATPase, H+ transporting, lysosomal V1 subunit
chr15	38592496	40.19	37.84	35.9	39.29	50	65.49	70.18	74.76	65.81	53.04	57.64	63	60.2	63.03	60.18	51.4	TSS	NM_025494	Atp6v1c1	NM_025494	ATPase, H+ transporting, lysosomal V1 subunit
chr15	38838094	14.95	15.32	17.09	15.18	23.21	13.27	60.53	33.01	32.48	30.43	26.39	36	33.67	47.06	30.97	45.79	TSS	AK088399	Fzd6	NM_008056	frizzled 6
chr15	39676284	28.04	20.72	22.22	25.89	5.36	8.85	11.4	9.71	12.82	14.78	17.36	4	6.12	8.4	7.96	6.54	Gene body	NM_022722	Dpys	NM_022722	dihydropyrimidinase
chr15	40487775	7.48	4.5	5.98	6.25	36.61	15.93	26.32	21.36	23.93	27.83	13.89	20	24.49	23.53	11.5	43.93	TSS	NM_011766	Zfpm2	NM_011766	zinc finger protein, multitype 2
chr15	41621037	138.32	128.83	121.37	114.29	180.36	204.42	182.46	171.84	211.11	139.13	165.28	176	139.8	145.38	166.37	155.14	TSS	NM_130885	Oxr1	NM_130885	oxidation resistance 1
chr15	44508314	26.17	23.42	21.37	21.43	4.46	8.85	7.89	20.39	18.8	24.35	18.75	10	7.14	8.4	10.62	7.48	Gene body	AK220268	5730410E15Rik	NM_178765	Golgi-localized syntaphilin-related protein
chr15	45957490	16.82	15.32	17.09	14.29	6.25	5.31	5.26	6.8	8.55	6.09	4.17	4	4.08	4.2	11.5	1.87	Intergenic
chr15	48882577	14.02	9.01	7.69	9.82	3.57	1.77	7.89	4.85	2.56	3.48	5.56	0	0	1.68	0	0	Intergenic
chr15	51697131	14.95	13.51	19.66	17.86	7.14	7.96	5.26	7.77	5.98	5.22	16.67	1	3.06	3.36	15.93	4.67	TSS	NM_080635	Eif3h	NM_080635	eukaryotic translation initiation factor 3,
chr15	53001957	19.63	26.13	25.64	22.32	10.71	7.96	7.89	7.77	8.55	10.43	20.14	16	9.18	16.81	8.85	10.28	Gene body	NM_010162	Ext1	NM_010162	exostosin 1
chr15	54314481	16.82	13.51	17.95	14.29	6.25	6.19	6.14	9.71	7.69	5.22	9.03	14	8.16	12.61	10.62	1.87	Intergenic
chr15	54938321	25.23	26.13	27.35	22.32	12.5	16.81	12.28	12.62	11.97	12.17	11.81	19	7.14	7.56	26.55	7.48	Intergenic
chr15	55009749	15.89	12.61	11.11	11.61	3.57	5.31	3.51	5.83	4.27	14.78	11.11	3	5.1	5.88	4.42	3.74	Gene body	NM_001037937	Depdc6	NM_001037937	DEP domain containing 6 isoform b
chr15	55388955	0	0	0	0.89	15.18	19.47	26.32	5.83	13.68	32.17	4.86	5	12.24	33.61	0	41.12	TSS	NM_134092	Mtbp	NM_134092	MDM2 Binding protein
chr15	55398821	20.56	21.62	35.04	18.75	5.36	4.42	3.51	2.91	5.13	9.57	19.44	5	3.06	11.76	17.7	7.48	Intergenic
chr15	55435731	18.69	19.82	18.8	24.11	10.71	8.85	7.89	10.68	7.69	16.52	26.39	7	7.14	18.49	10.62	3.74	Gene body	NM_134092	Mtbp	NM_134092	MDM2 Binding protein
chr15	55485701	0.93	0.9	0.85	0	8.04	5.31	9.65	10.68	5.13	11.3	4.86	7	13.27	4.2	7.96	4.67	Gene body	NM_016667	Sntb1	NM_016667	syntrophin, basic 1
chr15	55681556	8.41	11.71	10.26	9.82	3.57	1.77	2.63	1.94	1.71	2.61	4.17	5	2.04	8.4	5.31	1.87	Gene body	NM_016667	Sntb1	NM_016667	syntrophin, basic 1
chr15	57540632	37.38	35.14	46.15	48.21	8.04	15.04	14.04	12.62	17.09	13.04	27.78	16	4.08	9.24	26.55	9.35	Gene body	NM_199449	Zhx2	NM_199449	zinc fingers and homeoboxes protein 2
chr15	58765652	59.81	66.67	54.7	63.39	93.75	104.42	122.81	124.27	99.15	73.91	79.17	97	83.67	65.55	73.45	92.52	TSS	NM_023172	Ndufb9	NM_023172	NADH dehydrogenase (ubiquinone) 1 beta
chr15	58824410	33.64	18.02	15.38	24.11	5.36	2.65	5.26	2.91	1.71	12.17	13.19	5	3.06	3.36	5.31	0.93	Gene body	AK030533	Mtss1	NM_144800	actin monomer-binding protein
chr15	58830638	69.16	59.46	46.15	69.64	7.14	7.96	12.28	16.5	13.68	12.17	57.64	19	1.02	13.45	26.55	13.08	Gene body	AK030533	Mtss1	NM_144800	actin monomer-binding protein
chr15	59026173	8.41	11.71	14.53	14.29	2.68	4.42	1.75	2.91	3.42	4.35	6.94	7	4.08	6.72	2.65	2.8	Intergenic
chr15	59479944	22.43	17.12	22.22	18.75	40.18	13.27	4.39	11.65	10.26	11.3	21.53	9	6.12	6.72	6.19	8.41	TSS	AK080228	Trib1	NM_144549	tribbles homolog 1
chr15	60569806	17.76	12.61	12.82	18.75	1.79	3.54	3.51	3.88	5.13	4.35	9.72	5	1.02	11.76	8.85	2.8	Intergenic
chr15	61745054	8.41	13.51	24.79	12.5	0	0	0	0	2.56	5.22	2.78	0	2.04	0.84	0	0	Intergenic
chr15	66118092	1.87	0.9	1.71	1.79	32.14	12.39	17.54	23.3	13.68	21.74	16.67	12	48.98	0.84	1.77	34.58	TSS	NM_152923	Kcnq3	NM_152923	potassium voltage-gated channel, subfamily Q,
chr15	66205677	40.19	39.64	49.57	33.04	12.5	15.93	21.05	14.56	19.66	10.43	22.22	20	25.51	28.57	31.86	12.15	Intergenic
chr15	66441239	11.21	10.81	20.51	14.29	1.79	4.42	1.75	3.88	2.56	10.43	11.11	6	4.08	4.2	8.85	2.8	Gene body	AK047044	Phf20l1	NM_001081409	PHD finger protein 20-like 1
chr15	66528429	7.48	7.21	11.11	8.04	0.89	0.88	1.75	0.97	0	1.74	5.56	4	2.04	1.68	1.77	2.8	Gene body	U76389	Tg	NM_009375	thyroglobulin
chr15	66678786	17.76	18.92	21.37	17.86	9.82	11.5	10.53	8.74	7.69	12.17	19.44	11	13.27	18.49	15.93	14.02	Gene body	NM_009375	Tg	NM_009375	thyroglobulin
chr15	66993291	79.44	47.75	42.74	49.11	11.61	6.19	10.53	16.5	5.98	62.61	40.97	6	6.12	5.04	10.62	6.54	Intergenic
chr15	67005786	22.43	18.02	20.51	18.75	10.71	12.39	7.89	9.71	15.38	9.57	9.03	8	7.14	7.56	11.5	10.28	Gene body	AK169958	AK169958		Mus musculus adult male pituitary gland cDNA, RIKEN full-length enriched library, clone:5330418N22 product:unclassifiable, full insert sequence.
chr15	68194145	0	0	0	0	11.61	13.27	14.91	8.74	12.82	18.26	4.17	3	4.08	9.24	0.88	23.36	Intergenic
chr15	72377210	6.54	8.11	5.98	5.36	19.64	20.35	20.18	13.59	26.5	26.09	13.19	16	42.86	3.36	11.5	8.41	TSS	NM_001033876	Kcnk9	NM_001033876	potassium channel, subfamily K, member 9
chr15	72745922	12.15	9.01	11.97	15.18	1.79	1.77	3.51	2.91	4.27	3.48	7.64	2	0	10.08	3.54	3.74	Intergenic
chr15	72921490	15.89	15.32	14.53	24.11	3.57	7.96	3.51	2.91	8.55	6.09	5.56	5	4.08	5.04	6.19	3.74	TSS	NM_053068	Chrac1	NM_053068	chromatin accessibility complex 1
chr15	73016649	46.73	52.25	41.88	50.89	25	38.05	15.79	14.56	40.17	20	22.92	25	24.49	24.37	33.63	21.5	TSS	NM_153178	Eif2c2	NM_153178	eukaryotic translation initiation factor 2C, 2
chr15	73343377	53.27	54.95	54.7	63.39	128.57	104.42	107.89	124.27	99.15	108.7	94.44	116	129.59	26.05	77.88	101.87	TSS	NM_001081066	Dennd3	NM_001081066	DENN/MADD domain containing 3
chr15	73392764	18.69	15.32	12.82	16.07	6.25	5.31	7.02	5.83	5.13	5.22	11.81	10	7.14	4.2	11.5	5.61	Gene body	NM_001081066	Dennd3	NM_001081066	DENN/MADD domain containing 3
chr15	73536972	40.19	35.14	39.32	33.04	16.07	28.32	15.79	19.42	29.06	20	22.22	18	19.39	17.65	20.35	25.23	TSS	NM_173365	Gpr20	NM_173365	G protein-coupled receptor 20
chr15	73555841	60.75	49.55	46.15	52.68	85.71	92.92	94.74	109.71	96.58	72.17	105.56	87	50	74.79	83.19	112.15	TSS	AK004562	Ptp4a3	NM_008975	protein tyrosine phosphatase 4a3
chr15	73644683	79.44	61.26	71.79	58.04	33.93	30.09	49.12	23.3	38.46	68.7	59.72	27	37.76	26.89	34.51	37.38	Gene body	AK132992	Gm628		Mus musculus adult male testis cDNA, RIKEN full-length enriched library, clone:4930545J21 product:hypothetical ARM repeat fold containing protein, full insert sequence.
chr15	73682422	21.5	24.32	17.95	21.43	11.61	9.73	9.65	10.68	8.55	6.96	20.83	17	21.43	11.76	12.39	12.15	Intergenic
chr15	74346696	0	0.9	0	0	5.36	7.96	8.77	5.83	12.82	6.96	2.78	0	2.04	19.33	1.77	7.48	TSS	NM_174991	Bai1	NM_174991	brain-specific angiogenesis inhibitor 1
chr15	74348690	26.17	32.43	22.22	30.36	100.89	60.18	108.77	84.47	93.16	90.43	72.92	62	128.57	46.22	37.17	91.59	Gene body	NM_174991	Bai1	NM_174991	brain-specific angiogenesis inhibitor 1
chr15	74458693	30.84	32.43	27.35	32.14	13.39	14.16	15.79	13.59	12.82	19.13	13.19	13	10.2	31.09	38.05	10.28	Gene body	AK006048	1700016M24Rik		1700016M24Rik protein.
chr15	74755922	18.69	18.92	17.95	23.21	10.71	12.39	9.65	8.74	9.4	10.43	36.81	27	14.29	15.13	14.16	18.69	Intergenic
chr15	75051541	44.86	34.23	47.01	36.61	4.46	4.42	14.04	20.39	11.11	17.39	53.47	17	13.27	18.49	15.04	12.15	Gene body	BC025446	BC025446		CDNA sequence BC025446.
chr15	75397086	2.8	2.7	3.42	4.46	4.46	2.65	1.75	8.74	4.27	3.48	6.25	11	12.24	16.81	8.85	16.82	TSS	AK034884	Ly6h	NM_011837	lymphocyte antigen 6 complex, locus H
chr15	75506284	28.97	29.73	39.32	36.61	10.71	14.16	14.91	14.56	17.95	8.7	15.97	10	14.29	13.45	23.89	11.21	Gene body	NM_028404	Top1mt	NM_028404	DNA topoisomerase 1, mitochondrial
chr15	75577136	16.82	16.22	13.68	10.71	66.96	31.86	47.37	45.63	41.03	49.57	41.67	41	53.06	5.88	10.62	71.03	3End	NM_194350	Mafa	NM_194350	Mafa homolog
chr15	75577797	86.92	81.98	75.21	85.71	129.46	118.58	132.46	117.48	141.03	119.13	111.11	134	134.69	95.8	94.69	101.87	TSS	NM_194350	Mafa	NM_194350	Mafa homolog
chr15	75698822	21.5	20.72	22.22	17.86	24.11	24.78	22.81	42.72	19.66	21.74	22.22	39	32.65	42.02	36.28	38.32	3End	NM_026960	Gsdmdc1	NM_026960	gasdermin domain containing 1
chr15	75786051	11.21	13.51	17.95	13.39	2.68	5.31	5.26	4.85	3.42	4.35	5.56	4	5.1	10.08	7.08	1.87	Intergenic
chr15	76036764	25.23	24.32	27.35	20.54	46.43	46.9	64.04	47.57	25.64	33.04	34.72	59	43.88	41.18	44.25	57.94	TSS	AF188008	Plec1		Mus musculus plectin isoform plec 0,1c,2alpha (Plec1) mRNA, partial cds.
chr15	76039027	94.39	109.91	101.71	96.43	148.21	138.94	161.4	184.47	150.43	92.17	165.97	177	103.06	105.88	110.62	157.01	TSS	NM_201387	Plec1	NM_201387	plectin 1 isoform 4
chr15	76125254	0	0	0.85	0.89	9.82	8.85	29.82	11.65	22.22	21.74	5.56	3	6.12	15.97	1.77	15.89	TSS	AK005822	AK005822		Mus musculus adult male testis cDNA, RIKEN full-length enriched library, clone:1700010G02 product:inferred: 5-OXOPROLINASE (EC 3.5.2.9) (5-OXO-L-PROLINASE) (PYROGLUTAMASE) (5-OPASE). [Rat] {Rattus norvegicus}, full insert sequence.
chr15	76175082	68.22	58.56	65.81	68.75	36.61	36.28	26.32	31.07	38.46	30.43	32.64	55	18.37	30.25	74.34	21.5	TSS	AK170272	Cyc1	NM_025567	cytochrome c-1
chr15	76186911	8.41	9.01	11.97	10.71	28.57	19.47	23.68	20.39	19.66	13.04	9.72	21	22.45	12.61	16.81	21.5	3End	AK004406	Maf1	NM_026859	repressor of RNA polymerase III transcription
chr15	76199966	56.07	59.46	67.52	68.75	32.14	42.48	29.82	32.04	31.62	29.57	41.67	49	29.59	36.97	71.68	37.38	TSS	NM_021555	Brp16	NM_021555	brain protein 16
chr15	76349382	22.43	19.82	20.51	13.39	81.25	42.48	72.81	88.35	52.99	80	41.67	73	68.37	24.37	30.09	134.58	Gene body	NM_130893	Scrt1	NM_130893	scratch homolog 1, zinc finger protein
chr15	76352174	29.91	35.14	33.33	35.71	43.75	53.1	51.75	48.54	52.14	41.74	37.5	48	53.06	51.26	53.1	56.07	TSS	NM_130893	Scrt1	NM_130893	scratch homolog 1, zinc finger protein
chr15	76353973	21.5	28.83	23.93	30.36	60.71	46.02	68.42	60.19	60.68	70.43	59.72	53	96.94	11.76	29.2	59.81	TSS	NM_130893	Scrt1	NM_130893	scratch homolog 1, zinc finger protein
chr15	76411409	50.47	42.34	47.01	33.93	14.29	7.96	5.26	12.62	16.24	44.35	67.36	17	14.29	14.29	13.27	19.63	Gene body	NM_172960	Adck5	NM_172960	aarF domain containing kinase 5
chr15	76456359	8.41	7.21	6.84	6.25	21.43	15.93	33.33	26.21	28.21	21.74	20.83	30	9.18	10.08	7.96	49.53	TSS	NM_025842	Vps28	NM_025842	vacuolar protein sorting 28
chr15	76527378	29.91	13.51	14.53	8.93	0	0	2.63	0.97	0	4.35	9.03	2	0	1.68	1.77	0	TSS	NM_182805	Gpt1	NM_182805	glutamic pyruvic transaminase 1, soluble
chr15	76647732	14.95	17.12	18.8	13.39	35.71	39.82	67.54	32.04	43.59	37.39	37.5	35	27.55	34.45	28.32	38.32	TSS	AK141623	D15Wsu169e	NM_198420	hypothetical protein 9530053N22
chr15	76730273	3.74	4.5	5.13	4.46	8.04	13.27	12.28	9.71	16.24	4.35	4.17	5	2.04	3.36	2.65	2.8	TSS	NM_025536	Commd5	NM_025536	COMM domain containing 5
chr15	76839519	38.32	50.45	54.7	54.46	16.07	10.62	14.04	14.56	16.24	20.87	28.47	20	16.33	12.61	27.43	28.97	Intergenic
chr15	77089150	18.69	15.32	15.38	16.96	6.25	7.08	5.26	7.77	5.98	6.96	8.33	8	9.18	8.4	24.78	11.21	Gene body	NM_053104	Rbm9	NM_053104	RNA binding motif protein 9 isoform 1
chr15	77459326	20.56	20.72	17.09	16.96	9.82	10.62	8.77	8.74	12.82	14.78	9.72	12	8.16	3.36	17.7	8.41	Intergenic
chr15	77646515	24.3	27.03	24.79	24.11	16.07	15.04	14.04	15.53	16.24	14.78	11.11	15	9.18	10.08	22.12	14.95	Gene body	BC128498	Myh9		Myh9 protein.
chr15	77672102	54.21	51.35	52.99	50	31.25	32.74	28.07	25.24	29.06	11.3	41.67	34	17.35	27.73	41.59	36.45	TSS	BC128498	Myh9		Myh9 protein.
chr15	77958600	16.82	17.12	17.95	14.29	8.04	11.5	7.89	9.71	8.55	9.57	11.11	9	20.41	14.29	21.24	8.41	Gene body	AK043153	AK043153		Mus musculus 7 days neonate cerebellum cDNA, RIKEN full-length enriched library, clone:A730060N03 product:hypothetical protein, full insert sequence.
chr15	78361456	40.19	44.14	49.57	55.36	18.75	9.73	19.3	17.48	17.09	21.74	25	29	14.29	16.81	22.12	21.5	TSS	NM_028331	C1qtnf6	NM_028331	C1q and tumor necrosis factor related protein 6
chr15	78501945	9.35	11.71	12.82	13.39	4.46	4.42	4.39	2.91	5.98	3.48	5.56	7	7.14	12.61	8.85	0.93	TSS	AK018845	1700041B01Rik		Adult male testis cDNA, RIKEN full-length enriched library, clone:1700041B01 product:hypothetical protein, full insert sequence. (Fragment).
chr15	78687696	77.57	66.67	62.39	83.04	37.5	38.05	47.37	40.78	31.62	76.52	55.56	32	34.69	40.34	29.2	28.97	TSS	NM_025622	Lgals2	NM_025622	lectin, galactose-binding, soluble 2
chr15	78819138	31.78	31.53	28.21	31.25	12.5	15.04	14.04	15.53	15.38	10.43	16.67	20	13.27	22.69	34.51	27.1	Gene body	NM_001024716	Triobp	NM_001024716	TRIO and F-actin binding protein isoform 1
chr15	78873896	44.86	35.14	47.86	50	16.96	25.66	16.67	19.42	18.8	18.26	19.44	20	17.35	32.77	35.4	14.02	TSS	NM_015738	Galr3	NM_015738	galanin receptor 3
chr15	78928144	88.79	113.51	132.48	130.36	30.36	56.64	29.82	34.95	46.15	46.09	65.28	47	32.65	65.55	59.29	47.66	Intergenic
chr15	79059605	14.95	12.61	15.38	16.07	5.36	5.31	7.89	4.85	6.84	9.57	14.58	11	5.1	4.2	15.04	4.67	TSS	NM_008837	Pick1	NM_008837	protein interacting with C kinase 1
chr15	79082483	0.93	1.8	0.85	0	25.89	33.63	21.05	15.53	29.06	37.39	23.61	28	25.51	14.29	23.89	33.64	Gene body	NM_020516	Slc16a8	NM_020516	solute carrier family 16, member 8
chr15	79347069	0	0.9	0	0.89	12.5	15.93	30.7	7.77	21.37	21.74	1.39	2	2.04	15.13	1.77	14.02	TSS	NM_134090	Kdelr3	NM_134090	KDEL (Lys-Asp-Glu-Leu) endoplasmic reticulum
chr15	79501345	0	0	0	0	16.07	6.19	14.04	14.56	8.55	10.43	2.08	5	7.14	8.4	2.65	14.02	TSS	NM_172609	Tomm22	NM_172609	translocase of outer mitochondrial membrane 22
chr15	79527369	21.5	17.12	16.24	13.39	0.89	1.77	0.88	3.88	9.4	16.52	13.19	4	1.02	4.2	1.77	2.8	Gene body	NM_013818	Gtpbp1	NM_013818	GTP binding protein 1
chr15	79921862	21.5	19.82	17.95	21.43	46.43	41.59	46.49	26.21	40.17	28.7	43.75	42	35.71	46.22	39.82	41.12	TSS	NM_207708	Syngr1	NM_207708	synaptogyrin 1 isoform 1a
chr15	80080334	21.5	23.42	37.61	24.11	5.36	1.77	5.26	4.85	1.71	6.09	26.39	12	5.1	7.56	6.19	11.21	Gene body	AK044773	Smcr7l	NM_178719	hypothetical protein LOC239555
chr15	80084934	0	0	0	0	11.61	6.19	17.54	5.83	9.4	6.09	9.72	12	2.04	12.61	9.73	0	TSS	NM_009716	Atf4	NM_009716	activating transcription factor 4
chr15	80261344	5.61	4.5	5.13	3.57	8.04	9.73	9.65	15.53	9.4	9.57	23.61	13	14.29	10.08	19.47	18.69	Intergenic
chr15	80643516	24.3	25.23	28.21	37.5	7.14	12.39	10.53	8.74	12.82	12.17	14.58	9	9.18	18.49	13.27	10.28	Gene body	NM_177124	Tnrc6b	NM_177124	trinucleotide repeat containing 6b isoform 2
chr15	80664959	29.91	19.82	31.62	26.79	7.14	10.62	9.65	7.77	9.4	16.52	15.97	12	7.14	9.24	17.7	3.74	Gene body	NM_177124	Tnrc6b	NM_177124	trinucleotide repeat containing 6b isoform 2
chr15	81066111	7.48	5.41	6.84	10.71	55.36	23.89	34.21	42.72	35.04	33.91	40.97	36	35.71	5.04	15.93	86.92	TSS	NM_145132	Mchr1	NM_145132	melanin-concentrating hormone receptor 1
chr15	81252628	101.87	97.3	90.6	109.82	144.64	149.56	183.33	153.4	148.72	112.17	138.89	149	130.61	121.01	91.15	155.14	Gene body	AK042110	Xpnpep3		Mus musculus 3 days neonate thymus cDNA, RIKEN full-length enriched library, clone:A630059F20 product:hypothetical Creatinase/prolidase N-terminal domain structure containing protein, full insert sequence.
chr15	81525312	33.64	40.54	36.75	31.25	86.61	62.83	68.42	84.47	58.97	72.17	54.17	69	70.41	34.45	29.2	102.8	3End	AY100452	D930017K21Rik		Lmb145-cap1-243 protein precursor (Fragment).
chr15	81525473	24.3	26.13	25.64	29.46	43.75	60.18	53.51	44.66	41.88	46.09	38.89	51	52.04	44.54	46.9	52.34	3End	AY100452	D930017K21Rik		Lmb145-cap1-243 protein precursor (Fragment).
chr15	81605188	25.23	17.12	13.68	19.64	5.36	2.65	3.51	1.94	3.42	5.22	5.56	6	3.06	6.72	7.96	6.54	TSS	AK157711	Zc3h7b	NM_001081016	ubiquitous tetratricopeptide containing protein
chr15	81628543	24.3	22.52	24.79	22.32	7.14	7.96	10.53	10.68	10.26	23.48	18.06	9	7.14	11.76	3.54	5.61	3End	NM_001081016	Zc3h7b	NM_001081016	ubiquitous tetratricopeptide containing protein
chr15	81958096	0.93	0	0	0	11.61	15.93	18.42	13.59	11.11	22.61	2.78	2	5.1	23.53	0	18.69	TSS	NM_172428	Ccdc134	NM_172428	coiled-coil domain containing 134
chr15	82030572	19.63	9.91	19.66	15.18	0	0.88	0	0	0	6.96	10.42	0	1.02	1.68	1.77	0	Gene body	NM_033218	Srebf2	NM_033218	sterol regulatory element binding factor 2
chr15	82123629	15.89	19.82	12.82	28.57	16.96	23.01	22.81	18.45	17.09	23.48	27.08	34	30.61	41.18	33.63	37.38	Gene body	AK046722	40789	NM_011889	septin 3
chr15	82473522	17.76	12.61	10.26	12.5	1.79	0.88	0	1.94	0.85	3.48	6.94	1	3.06	2.52	2.65	0.93	TSS	NR_003552	Cyp2d13		Mus musculus adult male liver cDNA, RIKEN full-length enriched library, clone:1300007K12 product:similar to CYTOCHROME P450 2D3 (EC 1.14.14.1) (CYPIID3) (P450-DB3) (DEBRISOQUINE 4-HYDROXYLASE) [Rattus norvegicus], full insert sequence.
chr15	82839891	25.23	18.02	29.91	21.43	2.68	4.42	4.39	2.91	5.98	13.91	6.94	4	4.08	12.61	9.73	0.93	Gene body	AK162939	Nfam1		NFAT activation molecule 1 precursor (Calcineurin/NFAT-activating ITAM-containing protein) (NFAT-activating protein with ITAM motif 1).
chr15	82999276	16.82	22.52	21.37	18.75	68.75	80.53	44.74	54.37	42.74	21.74	18.06	46	52.04	36.97	45.13	57.94	TSS	AK010858	Cyb5r3		Mus musculus strain ISS cytochrome b-5 reductase mRNA, complete cds.
chr15	83283289	9.35	16.22	10.26	13.39	2.68	1.77	2.63	1.94	4.27	4.35	12.5	6	1.02	5.04	0	4.67	Intergenic
chr15	83294877	2.8	3.6	2.56	4.46	41.07	16.81	27.19	16.5	18.8	26.09	12.5	30	15.31	11.76	0	37.38	Intergenic
chr15	83394130	49.53	53.15	35.9	42.86	13.39	22.12	14.04	12.62	17.09	11.3	22.92	30	17.35	20.17	39.82	26.17	TSS	NM_009775	Tspo	NM_009775	peripheral benzodiazepine receptor
chr15	83394633	19.63	22.52	11.97	20.54	80.36	47.79	80.7	89.32	53.85	44.35	56.25	70	63.27	32.77	21.24	89.72	TSS	NM_009775	Tspo	NM_009775	peripheral benzodiazepine receptor
chr15	83945964	73.83	61.26	76.92	77.68	15.18	16.81	12.28	13.59	17.95	19.13	38.89	19	15.31	27.73	36.28	12.15	Gene body	NM_029427	Pnpla5	NM_029427	patatin-like phospholipase domain containing 5
chr15	84134207	2.8	4.5	2.56	4.46	12.5	14.16	24.56	5.83	14.53	17.39	12.5	13	24.49	30.25	12.39	15.89	Gene body	NM_133167	Parvb	NM_133167	parvin, beta
chr15	84275628	10.28	10.81	11.11	10.71	2.68	3.54	3.51	3.88	3.42	3.48	5.56	4	5.1	5.88	8.85	1.87	TSS	AK129415	1810041L15Rik		1810041L15Rik protein (Hypothetical protein).
chr15	84493741	45.79	30.63	20.51	34.82	29.46	24.78	26.32	24.27	23.08	34.78	38.19	42	36.73	47.06	43.36	53.27	TSS	AK046057	Arhgap8	NM_146061	Rho GTPase activating protein 8
chr15	84842910	4.67	5.41	6.84	6.25	23.21	17.7	13.16	24.27	19.66	19.13	16.67	22	14.29	10.92	14.16	12.15	Intergenic
chr15	85125021	0	0	0.85	0	10.71	12.39	20.18	13.59	22.22	18.26	19.44	10	19.39	31.09	17.7	24.3	Intergenic
chr15	85483615	68.22	70.27	70.09	55.36	26.79	35.4	37.72	30.1	31.62	26.09	32.64	39	22.45	55.46	69.91	27.1	Gene body	AK041762	AK041762		Mus musculus 3 days neonate thymus cDNA, RIKEN full-length enriched library, clone:A630035J15 product:unclassifiable, full insert sequence.
chr15	85491927	37.38	33.33	49.57	41.07	8.93	10.62	10.53	11.65	19.66	16.52	27.78	18	9.18	15.97	27.43	10.28	Gene body	AK041762	AK041762		Mus musculus 3 days neonate thymus cDNA, RIKEN full-length enriched library, clone:A630035J15 product:unclassifiable, full insert sequence.
chr15	85505798	27.1	20.72	23.08	15.18	0.89	5.31	2.63	4.85	8.55	5.22	9.03	4	1.02	3.36	5.31	1.87	Intergenic
chr15	85508464	63.55	48.65	58.97	35.71	10.71	15.93	14.91	23.3	11.11	52.17	56.25	17	8.16	17.65	8.85	8.41	Intergenic
chr15	85533129	39.25	34.23	41.88	35.71	6.25	14.16	12.28	19.42	13.68	17.39	21.53	15	9.18	14.29	14.16	15.89	Intergenic
chr15	85641429	32.71	28.83	33.33	28.57	10.71	10.62	11.4	16.5	11.97	13.91	16.67	17	9.18	16.81	23.01	7.48	TSS	NM_197998	2210021J22Rik	NM_197998	hypothetical protein LOC72355
chr15	85682258	59.81	46.85	66.67	52.68	16.96	22.12	19.3	22.33	18.8	66.09	45.14	23	18.37	21.01	15.93	14.95	Gene body	NM_001033337	AW124722	NM_001033337	hypothetical protein LOC239570
chr15	86645185	6.54	8.11	0	4.46	0.89	0	0	0	0	0	0	6	7.14	14.29	10.62	7.48	Intergenic
chr15	87382226	37.38	31.53	38.46	31.25	18.75	15.93	16.67	22.33	21.37	20.87	31.94	30	25.51	31.93	38.05	33.64	Gene body	AK090194	AW049604		Mus musculus 16 days neonate male medulla oblongata cDNA, RIKEN full-length enriched library, clone:G630016A22 product:hypothetical protein, full insert sequence.
chr15	87440225	15.89	15.32	19.66	18.75	7.14	7.96	7.02	12.62	11.97	14.78	15.97	9	9.18	9.24	10.62	7.48	Intergenic
chr15	87672695	29.91	20.72	28.21	28.57	11.61	12.39	7.02	7.77	11.97	2.61	20.14	14	18.37	15.13	32.74	18.69	Intergenic
chr15	88065204	0	0	0	0	9.82	7.96	9.65	12.62	7.69	10.43	7.64	9	8.16	9.24	12.39	7.48	Intergenic
chr15	88490083	20.56	19.82	23.08	18.75	12.5	21.24	13.16	10.68	24.79	15.65	19.44	11	12.24	13.45	15.04	13.08	Intergenic
chr15	88518707	20.56	25.23	23.93	17.86	7.14	8.85	7.89	4.85	9.4	15.65	11.81	7	6.12	10.92	9.73	8.41	Gene body	AK220233	mKIAA4191		Mus musculus bone marrow macrophage cDNA, RIKEN full-length enriched library, clone:G530012I18 product:bromodomain containing 1, full insert sequence.
chr15	88582740	46.73	56.76	52.14	55.36	90.18	77.88	87.72	96.12	76.92	84.35	82.64	103	89.8	43.7	79.65	143.93	TSS	NM_181412	Zbed4	NM_181412	zinc finger, BED domain containing 4
chr15	88674034	9.35	10.81	9.4	11.61	20.54	16.81	19.3	19.42	21.37	13.04	11.81	17	15.31	15.97	14.16	11.21	Intergenic
chr15	88683323	34.58	38.74	41.03	27.68	0.89	4.42	2.63	1.94	0.85	10.43	22.92	5	0	3.36	1.77	1.87	Intergenic
chr15	88684530	17.76	15.32	13.68	18.75	6.25	7.96	4.39	5.83	5.98	8.7	9.03	12	2.04	5.88	15.93	11.21	Intergenic
chr15	88690161	19.63	9.91	13.68	17.86	1.79	1.77	4.39	0.97	2.56	6.96	13.19	2	1.02	5.04	1.77	0.93	TSS	NM_145478	Pim3	NM_145478	proviral integration site 3
chr15	88697576	54.21	41.44	56.41	59.82	10.71	16.81	21.93	17.48	13.68	13.91	48.61	13	8.16	21.01	30.97	17.76	3End	NM_145478	Pim3	NM_145478	proviral integration site 3
chr15	88722336	19.63	16.22	19.66	20.54	3.57	2.65	0	2.91	0	5.22	16.67	1	0	0.84	1.77	0	TSS	AK006138	AK006138		Mus musculus adult male testis cDNA, RIKEN full-length enriched library, clone:1700019P01 product:unclassifiable, full insert sequence.
chr15	88953397	2.8	2.7	2.56	4.46	10.71	10.62	21.93	5.83	9.4	3.48	6.25	9	9.18	12.61	12.39	12.15	TSS	AK052441	Tubgcp6		13 days embryo lung cDNA, RIKEN full-length enriched library, clone:D430023H11 product:hypothetical Phospholipase A2 containing protein, full insert sequence. (Fragment).
chr15	88977298	85.05	87.39	78.63	91.96	116.96	120.35	126.32	121.36	135.04	137.39	120.83	102	135.71	118.49	91.15	128.04	Gene body	NM_011161	Mapk11	NM_011161	mitogen-activated protein kinase 11
chr15	89003661	0.93	0.9	0	0	49.11	13.27	42.11	54.37	11.11	29.57	14.58	22	17.35	11.76	1.77	62.62	Intergenic
chr15	89185776	15.89	15.32	12.82	17.86	39.29	29.2	42.98	27.18	39.32	48.7	20.83	18	23.47	42.02	22.12	29.91	TSS	NM_178919	Tmem112b	NM_178919	hypothetical protein LOC105847
chr15	89311089	42.06	40.54	58.97	52.68	14.29	18.58	10.53	19.42	16.24	24.35	21.53	16	7.14	10.08	14.16	10.28	Intergenic
chr15	89363357	24.3	23.42	23.08	20.54	30.36	30.09	27.19	37.86	16.24	45.22	21.53	38	29.59	36.13	31.86	34.58	Gene body	NM_021423	Shank3	NM_021423	SH3/ankyrin domain gene 3
chr15	90626559	27.1	22.52	23.08	27.68	9.82	16.81	18.42	22.33	17.09	14.78	21.53	12	10.2	13.45	12.39	8.41	Intergenic
chr15	90879776	4.67	7.21	4.27	4.46	18.75	14.16	27.19	13.59	17.95	22.61	11.81	15	16.33	9.24	2.65	28.04	TSS	NM_016705	Kif21a	NM_016705	kinesin family member 21A
chr15	90904308	15.89	9.01	7.69	11.61	0.89	0.88	0	2.91	5.13	5.22	1.39	1	2.04	1.68	0.88	2.8	Intergenic
chr15	91574415	16.82	21.62	17.09	18.75	8.04	9.73	9.65	8.74	8.55	9.57	11.81	13	16.33	15.97	16.81	10.28	Intergenic
chr15	92337627	15.89	18.92	18.8	18.75	7.14	8.85	7.02	10.68	7.69	17.39	16.67	5	8.16	6.72	15.93	7.48	Intergenic
chr15	93167793	73.83	90.99	85.47	94.64	35.71	35.4	33.33	46.6	35.9	40.87	71.53	38	44.9	40.34	45.13	26.17	TSS	AK011702	YAF2		Mus musculus YAF2 mRNA for YY1 associated factor-2-a, complete cds.
chr15	94246148	11.21	8.11	11.97	8.04	1.79	2.65	1.75	2.91	2.56	2.61	3.47	6	4.08	4.2	1.77	3.74	Intergenic
chr15	94579603	0	0.9	0	0	3.57	8.85	8.77	10.68	11.11	6.96	11.11	5	17.35	9.24	11.5	3.74	Intergenic
chr15	95594043	54.21	51.35	47.01	49.11	58.93	73.45	69.3	63.11	67.52	59.13	76.39	79	75.51	82.35	71.68	96.26	Intergenic
chr15	96306970	71.96	70.27	83.76	80.36	55.36	59.29	36.84	61.17	58.97	45.22	54.17	49	47.96	42.02	54.87	45.79	Intergenic
chr15	96376196	13.08	16.22	24.79	21.43	15.18	15.04	2.63	5.83	8.55	2.61	1.39	1	2.04	2.52	4.42	1.87	Intergenic
chr15	96376695	12.15	8.11	14.53	13.39	37.5	25.66	11.4	22.33	19.66	4.35	0.69	3	5.1	2.52	2.65	4.67	Intergenic
chr15	96471519	14.95	11.71	15.38	13.39	6.25	6.19	3.51	4.85	5.13	5.22	13.89	13	10.2	17.65	11.5	18.69	TSS	AK047459	Slc38a1	NM_134086	solute carrier family 38, member 1
chr15	96491540	53.27	53.15	48.72	50	30.36	30.97	40.35	34.95	30.77	31.3	60.42	51	56.12	54.62	47.79	57.94	Intergenic
chr15	96529670	25.23	24.32	16.24	19.64	91.96	11.5	21.93	65.05	18.8	3.48	2.08	1	2.04	1.68	0	1.87	TSS	BC027259	mKIAA1382		Mus musculus 11 days pregnant adult female ovary and uterus cDNA, RIKEN full-length enriched library, clone:5033402L14 product:hypothetical protein, full insert sequence.
chr15	96683745	13.08	9.91	13.68	11.61	8.04	15.04	14.91	16.5	12.82	21.74	15.97	23	21.43	31.09	22.12	28.04	Intergenic
chr15	96835060	12.15	9.01	8.55	10.71	8.04	5.31	4.39	3.88	5.98	6.09	4.86	3	3.06	2.52	1.77	4.67	Gene body	AB055004	Slc38a4	NM_027052	solute carrier family 38, member 4
chr15	98011956	54.21	50.45	56.41	56.25	20.54	45.13	20.18	19.42	29.06	26.09	22.92	28	26.53	25.21	31.86	23.36	Intergenic
chr15	98399468	128.04	136.94	121.37	123.21	183.93	169.03	151.75	172.82	135.9	138.26	144.44	175	177.55	174.79	151.33	182.24	TSS	AK140384	AK140384		Mus musculus 4 days neonate thymus cDNA, RIKEN full-length enriched library, clone:B630007K22 product:hypothetical protein, full insert sequence.
chr15	98440568	42.06	47.75	57.26	42.86	23.21	27.43	20.18	18.45	23.93	18.26	17.36	37	23.47	12.61	30.97	24.3	TSS	NM_007405	Adcy6	NM_007405	adenylate cyclase 6
chr15	98479085	12.15	10.81	15.38	14.29	2.68	1.77	3.51	9.71	2.56	6.96	11.81	6	3.06	5.04	3.54	2.8	Gene body	BC049928	Ddx23		Mus musculus adult male testis cDNA, RIKEN full-length enriched library, clone:4921506D17 product:weakly similar to PRP28, U5 SNRNP 100 KDA PROTEIN [Homo sapiens], full insert sequence.
chr15	98508757	13.08	16.22	15.38	18.75	4.46	0	0.88	4.85	7.69	6.09	16.67	5	2.04	3.36	4.42	4.67	TSS	BC048531	Rnd1	NM_172612	Rho family GTPase 1
chr15	98724771	17.76	21.62	22.22	16.96	38.39	35.4	46.49	32.04	38.46	29.57	25	37	37.76	25.21	30.97	50.47	Gene body	NM_007857	Dhh	NM_007857	desert hedgehog
chr15	98887763	80.37	88.29	79.49	83.04	122.32	127.43	145.61	128.16	144.44	110.43	121.53	122	101.02	127.73	115.04	126.17	Gene body	NM_013639	Prph	NM_013639	peripherin
chr15	99055432	38.32	32.43	34.19	29.46	83.04	58.41	69.3	78.64	60.68	73.91	70.83	74	93.88	39.5	47.79	80.37	TSS	NM_010601	Kcnh3	NM_010601	potassium voltage-gated channel, subfamily H
chr15	99115213	33.64	43.24	43.59	36.61	17.86	23.89	14.91	17.48	18.8	17.39	19.44	10	23.47	18.49	38.94	14.95	Gene body	NM_001081254	EG545136	NM_001081254	predicted gene, EG545136
chr15	99261092	14.02	16.22	14.53	10.71	3.57	4.42	3.51	6.8	4.27	4.35	7.64	7	4.08	13.45	10.62	3.74	Gene body	NM_001001884	C230021P08Rik	NM_001001884	hypothetical protein LOC380969
chr15	99304659	14.02	9.01	10.26	9.82	2.68	3.54	1.75	3.88	4.27	4.35	2.08	11	1.02	1.68	4.42	6.54	TSS	NM_029236	Bcdin3d	NM_029236	BCDIN3 domain containing
chr15	99333337	17.76	12.61	16.24	11.61	6.25	5.31	5.26	3.88	3.42	3.48	5.56	2	5.1	6.72	9.73	1.87	Gene body	NM_028224	Faim2	NM_028224	lifeguard isoform 1
chr15	99346018	42.99	35.14	58.12	50	4.46	7.96	7.02	5.83	11.11	15.65	10.42	8	8.16	21.01	15.04	7.48	Gene body	AK136791	Lfg		Mus musculus lifeguard (Lfg) mRNA, complete cds.
chr15	99536249	9.35	9.91	10.26	9.82	25.89	32.74	25.44	27.18	26.5	20.87	9.72	16	10.2	17.65	6.19	20.56	Gene body	NM_031842	Smarcd1	NM_031842	SWI/SNF related, matrix associated, actin
chr15	99620629	32.71	15.32	34.19	23.21	1.79	3.54	5.26	3.88	0.85	5.22	14.58	3	4.08	12.61	3.54	0	Gene body	AF307845	Lima1		Lima1 protein.
chr15	99788745	68.22	36.94	28.21	57.14	2.68	10.62	3.51	4.85	4.27	3.48	1.39	2	4.08	0	7.96	0.93	Gene body	AK133226	Gm920		Adult male testis cDNA, RIKEN full-length enriched library, clone:4932418P17 product:hypothetical Alanine-rich region profile containing protein, full insert sequence. (Fragment).
chr15	100059666	38.32	28.83	34.19	38.39	16.07	12.39	9.65	16.5	12.82	7.83	15.97	18	6.12	13.45	22.12	12.15	TSS	NM_007497	Atf1	NM_007497	activating transcription factor 1
chr15	100294191	16.82	20.72	18.8	19.64	9.82	13.27	11.4	9.71	11.11	16.52	14.58	17	7.14	13.45	23.89	14.95	Intergenic
chr15	100381442	19.63	21.62	18.8	22.32	39.29	29.2	32.46	30.1	22.22	29.57	24.31	37	31.63	36.13	30.09	42.06	TSS	AK147898	Tcfcp2	NM_033476	transcription factor CP2
chr15	100492582	25.23	23.42	27.35	21.43	4.46	5.31	4.39	3.88	6.84	10.43	17.36	8	2.04	5.04	3.54	7.48	Intergenic
chr15	100493310	24.3	15.32	19.66	16.07	5.36	5.31	3.51	2.91	5.13	12.17	14.58	3	1.02	8.4	4.42	3.74	Intergenic
chr15	100870772	26.17	21.62	22.22	18.75	4.46	7.96	7.02	7.77	7.69	6.96	7.64	8	10.2	15.97	20.35	12.15	Gene body	NM_001077499	Scn8a	NM_001077499	sodium channel, voltage-gated, type VIII, alpha
chr15	100883651	4.67	6.31	5.98	5.36	16.07	14.16	10.53	13.59	10.26	11.3	7.64	15	18.37	7.56	7.96	15.89	Intergenic
chr15	100917280	23.36	11.71	25.64	22.32	1.79	0	1.75	1.94	0.85	18.26	21.53	1	2.04	0.84	2.65	1.87	Intergenic
chr15	101054565	9.35	13.51	13.68	16.07	2.68	4.42	1.75	2.91	3.42	2.61	4.17	6	4.08	3.36	9.73	4.67	TSS	AK038079	AK038079		Mus musculus 16 days neonate thymus cDNA, RIKEN full-length enriched library, clone:A130076P06 product:unclassifiable, full insert sequence.
chr15	101090671	15.89	17.12	22.22	17.86	7.14	1.77	3.51	6.8	10.26	11.3	16.67	8	7.14	9.24	8.85	6.54	Intergenic
chr15	101091165	35.51	30.63	60.68	50	9.82	7.96	4.39	3.88	11.11	13.91	19.44	13	4.08	13.45	25.66	3.74	Intergenic
chr15	101157748	34.58	27.93	29.06	34.82	15.18	18.58	14.04	12.62	14.53	13.91	11.81	25	9.18	18.49	24.78	6.54	Gene body	AK138921	AK138921		Mus musculus adult male aorta and vein cDNA, RIKEN full-length enriched library, clone:A530006D11 product:unclassifiable, full insert sequence.
chr15	101546537	14.02	14.41	14.53	20.54	6.25	7.96	5.26	4.85	5.13	8.7	7.64	10	17.35	5.04	9.73	6.54	Intergenic
chr15	101616393	29.91	34.23	39.32	33.04	19.64	21.24	15.79	13.59	15.38	13.91	31.25	29	20.41	26.89	32.74	24.3	TSS	NM_213728	Krt72	NM_213728	keratin 72
chr15	101686992	32.71	31.53	34.19	29.46	14.29	10.62	18.42	27.18	17.09	18.26	24.31	19	21.43	21.01	21.24	15.89	Intergenic
chr15	101936706	51.4	35.14	49.57	40.18	17.86	15.93	15.79	21.36	15.38	16.52	20.14	18	13.27	28.57	32.74	22.43	TSS	BC036265	Tenc1	NM_153533	C1 domain-containing phosphatase and tensin-like
chr15	102076072	39.25	53.15	49.57	50.89	25.89	21.24	17.54	24.27	19.66	14.78	32.64	37	23.47	28.57	38.05	26.17	TSS	NM_001042727	Rarg	NM_001042727	retinoic acid receptor, gamma isoform 2
chr15	102170313	0.93	0.9	0.85	1.79	8.93	7.96	6.14	11.65	6.84	6.09	14.58	8	11.22	11.76	3.54	9.35	Gene body	NM_153416	Aaas	NM_153416	achalasia, adrenocortical insufficiency,
[truncated: 3,575 more rows]
